# Supplementary material
Source: PubMed Central journal article supplement (PMC5367150)

**Facile functionalization at the C4 position of pyrimidine nucleosides *via* amide group activation with (benzotriazol-1-yloxy)tris(dimethylamino)phosphonium hexafluorophosphate (BOP) and biological evaluations of the products**

Hari K. Akula, Hariprasad Kokatla, Graciela Andrei, Robert Snoeck, Dominique Schols,  
Jan Balzarini, Lijia Yang and Mahesh K. Lakshman\*

**TABLE OF CONTENTS**

| <b>Information</b>                                                                            | <b>Page</b> |
|-----------------------------------------------------------------------------------------------|-------------|
| 500 MHz <sup>1</sup> H NMR spectrum of compound <b>4</b> in CDCl <sub>3</sub>                 | S-5         |
| 125 MHz <sup>13</sup> C NMR spectrum of compound <b>4</b> in CDCl <sub>3</sub>                | S-6         |
| 500 MHz <sup>1</sup> H NMR spectrum of compound <b>6</b> in acetone- <i>d</i> <sub>6</sub>    | S-7         |
| 125 MHz <sup>13</sup> C NMR spectrum of compound <b>6</b> in acetone- <i>d</i> <sub>6</sub>   | S-8         |
| 500 MHz <sup>1</sup> H NMR spectrum of compound <b>11a</b> in CDCl <sub>3</sub>               | S-9         |
| 125 MHz <sup>13</sup> C NMR spectrum of compound <b>11a</b> in CDCl <sub>3</sub>              | S-10        |
| 500 MHz <sup>1</sup> H NMR spectrum of compound <b>11b</b> in acetone- <i>d</i> <sub>6</sub>  | S-11        |
| 125 MHz <sup>13</sup> C NMR spectrum of compound <b>11b</b> in acetone- <i>d</i> <sub>6</sub> | S-12        |
| gCOSY spectrum of compound <b>11b</b> in acetone- <i>d</i> <sub>6</sub>                       | S-13        |
| 500 MHz <sup>1</sup> H NMR spectrum of compound <b>11c</b> in CDCl <sub>3</sub>               | S-14        |
| 500 MHz <sup>1</sup> H NMR spectrum of compound <b>11d</b> in CDCl <sub>3</sub>               | S-15        |
| 125 MHz <sup>13</sup> C NMR spectrum of compound <b>11d</b> in CDCl <sub>3</sub>              | S-16        |
| 500 MHz <sup>1</sup> H NMR spectrum of compound <b>11e</b> in CDCl <sub>3</sub>               | S-17        |
| 125 MHz <sup>13</sup> C NMR spectrum of compound <b>11e</b> in acetone- <i>d</i> <sub>6</sub> | S-18        |
| 500 MHz <sup>1</sup> H NMR spectrum of compound <b>11f</b> in CDCl <sub>3</sub>               | S-19        |
| 125 MHz <sup>13</sup> C NMR spectrum of compound <b>11f</b> in CDCl <sub>3</sub>              | S-20        |
| gCOSY spectrum of compound <b>11f</b> in CDCl <sub>3</sub>                                    | S-21        |
| 500 MHz <sup>1</sup> H NMR spectrum of compound <b>11g</b> in CDCl <sub>3</sub>               | S-22        |
| 125 MHz <sup>13</sup> C NMR spectrum of compound <b>11g</b> in CDCl <sub>3</sub>              | S-23        |
| gCOSY spectrum of compound <b>11g</b> in CDCl <sub>3</sub>                                    | S-24        |
| Expansion of gCOSY spectrum of compound <b>11g</b> in CDCl <sub>3</sub>                       | S-25        |
| 500 MHz <sup>1</sup> H NMR spectrum of compound <b>11h</b> in acetone- <i>d</i> <sub>6</sub>  | S-26        |
| 125 MHz <sup>13</sup> C NMR spectrum of compound <b>11h</b> in acetone- <i>d</i> <sub>6</sub> | S-27        |
| 500 MHz <sup>1</sup> H NMR spectrum of compound <b>11i</b> in acetone- <i>d</i> <sub>6</sub>  | S-28        |
| 125 MHz <sup>13</sup> C NMR spectrum of compound <b>11i</b> in acetone- <i>d</i> <sub>6</sub> | S-29        |
| 500 MHz <sup>1</sup> H NMR spectrum of compound <b>11j</b> in CDCl <sub>3</sub>               | S-30        |
| 125 MHz <sup>13</sup> C NMR spectrum of compound <b>11j</b> in CDCl <sub>3</sub>              | S-31        |
| 500 MHz <sup>1</sup> H NMR spectrum of compound <b>12a</b> in acetone- <i>d</i> <sub>6</sub>  | S-32        |
| 125 MHz <sup>13</sup> C NMR spectrum of compound <b>12a</b> in acetone- <i>d</i> <sub>6</sub> | S-33        |
| 500 MHz <sup>1</sup> H NMR spectrum of compound <b>12b</b> in CDCl <sub>3</sub>               | S-34        |
| 125 MHz <sup>13</sup> C NMR spectrum of compound <b>12b</b> in acetone- <i>d</i> <sub>6</sub> | S-35        |
| 500 MHz <sup>1</sup> H NMR spectrum of compound <b>12c</b> in acetone- <i>d</i> <sub>6</sub>  | S-36        |

|                                                                                       |      |
|---------------------------------------------------------------------------------------|------|
| 125 MHz $^{13}\text{C}$ NMR spectrum of compound <b>12c</b> in acetone- $d_6$         | S-37 |
| gCOSY spectrum of compound <b>12c</b> in acetone- $d_6$                               | S-38 |
| gHMQC spectrum of compound <b>12c</b> in acetone- $d_6$                               | S-39 |
| 500 MHz $^1\text{H}$ NMR spectrum of compound <b>12d</b> in acetone- $d_6$            | S-40 |
| 125 MHz $^{13}\text{C}$ NMR spectrum of compound <b>12d</b> in acetone- $d_6$         | S-41 |
| 500 MHz $^1\text{H}$ NMR spectrum of compound <b>12e</b> in $\text{CDCl}_3$           | S-42 |
| 125 MHz $^{13}\text{C}$ NMR spectrum of compound <b>12e</b> in $\text{CDCl}_3$        | S-43 |
| gCOSY spectrum of compound <b>12e</b> in $\text{CDCl}_3$                              | S-44 |
| 500 MHz $^1\text{H}$ NMR spectrum of compound <b>13a</b> in acetone- $d_6$            | S-45 |
| 125 MHz $^{13}\text{C}$ NMR spectrum of compound <b>13a</b> in acetone- $d_6$         | S-46 |
| 500 MHz $^1\text{H}$ NMR spectrum of compound <b>13b</b> in acetone- $d_6$            | S-47 |
| 125 MHz $^{13}\text{C}$ NMR spectrum of compound <b>13b</b> in acetone- $d_6$         | S-48 |
| 500 MHz $^1\text{H}$ NMR spectrum of compound <b>13c</b> in acetone- $d_6$            | S-49 |
| 125 MHz $^{13}\text{C}$ NMR spectrum of compound <b>13c</b> in acetone- $d_6$         | S-50 |
| gCOSY spectrum of compound <b>13c</b> in acetone- $d_6$                               | S-51 |
| 500 MHz $^1\text{H}$ NMR spectrum of compound <b>13d</b> in acetone- $d_6$            | S-52 |
| 125 MHz $^{13}\text{C}$ NMR spectrum of compound <b>13d</b> in acetone- $d_6$         | S-53 |
| 500 MHz $^1\text{H}$ NMR spectrum of compound <b>14a</b> in $\text{CDCl}_3$           | S-54 |
| 125 MHz $^{13}\text{C}$ NMR spectrum of compound <b>14a</b> in $\text{CDCl}_3$        | S-55 |
| 500 MHz $^1\text{H}$ NMR spectrum of compound <b>14b</b> in $\text{CDCl}_3$           | S-56 |
| 125 MHz $^{13}\text{C}$ NMR spectrum of compound <b>14b</b> in $\text{CDCl}_3$        | S-57 |
| 500 MHz $^1\text{H}$ NMR spectrum of compound <b>15</b> in $\text{CDCl}_3$            | S-58 |
| 125 MHz $^{13}\text{C}$ NMR spectrum of compound <b>15</b> in $\text{CDCl}_3$         | S-59 |
| 500 MHz $^1\text{H}$ NMR spectrum of compound <b>16a</b> in $\text{CDCl}_3$           | S-60 |
| 125 MHz $^{13}\text{C}$ NMR spectrum of compound <b>16a</b> in $\text{CDCl}_3$        | S-61 |
| 500 MHz $^1\text{H}$ NMR spectrum of compound <b>16b</b> in $\text{CDCl}_3$           | S-62 |
| 125 MHz $^{13}\text{C}$ NMR spectrum of compound <b>16b</b> in $\text{CDCl}_3$        | S-63 |
| 500 MHz $^1\text{H}$ NMR spectrum of compound <b>17</b> in $\text{CDCl}_3$            | S-64 |
| 125 MHz $^{13}\text{C}$ NMR spectrum of compound <b>17</b> in $\text{CDCl}_3$         | S-65 |
| 500 MHz $^1\text{H}$ NMR spectrum of compound <b>18</b> in $\text{CDCl}_3$            | S-66 |
| 125 MHz $^{13}\text{C}$ NMR spectrum of compound of <b>18</b> in $\text{CDCl}_3$      | S-67 |
| 500 MHz $^1\text{H}$ NMR spectrum of compound <b>19</b> in $\text{CDCl}_3$            | S-68 |
| 125 MHz $^{13}\text{C}$ NMR spectrum of compound <b>19</b> in $\text{CDCl}_3$         | S-69 |
| 500 MHz $^1\text{H}$ NMR spectrum of compound <b>5</b> in $\text{CD}_3\text{OD}$      | S-70 |
| 125 MHz $^{13}\text{C}$ NMR spectrum of compound <b>5</b> in $\text{CD}_3\text{OD}$   | S-71 |
| 500 MHz $^1\text{H}$ NMR spectrum of compound <b>20a</b> in $\text{CD}_3\text{OD}$    | S-72 |
| 125 MHz $^{13}\text{C}$ NMR spectrum of compound <b>20a</b> in $\text{CD}_3\text{OD}$ | S-73 |
| 500 MHz $^1\text{H}$ NMR spectrum of compound <b>20b</b> in $\text{CD}_3\text{OD}$    | S-74 |
| 125 MHz $^{13}\text{C}$ NMR spectrum of compound <b>20b</b> in $\text{CD}_3\text{OD}$ | S-75 |
| 500 MHz $^1\text{H}$ NMR spectrum of compound <b>20c</b> in $\text{CD}_3\text{OD}$    | S-76 |
| 125 MHz $^{13}\text{C}$ NMR spectrum of compound <b>20c</b> in $\text{CD}_3\text{OD}$ | S-77 |
| 500 MHz $^1\text{H}$ NMR spectrum of compound <b>20d</b> in $\text{CD}_3\text{OD}$    | S-78 |
| 125 MHz $^{13}\text{C}$ NMR spectrum of compound <b>20d</b> in $\text{CD}_3\text{OD}$ | S-79 |
| 500 MHz $^1\text{H}$ NMR spectrum of compound <b>20e</b> in $\text{CD}_3\text{OD}$    | S-80 |

|                                                                                           |       |
|-------------------------------------------------------------------------------------------|-------|
| 125 MHz <sup>13</sup> C NMR spectrum of compound <b>20e</b> in CD <sub>3</sub> OD         | S-81  |
| gCOSY spectrum of compound <b>20e</b> in CD <sub>3</sub> OD                               | S-82  |
| gHMQC spectrum of compound <b>20e</b> in CD <sub>3</sub> OD                               | S-83  |
| Expansion of gHMQC spectrum of compound <b>20e</b> in CD <sub>3</sub> OD                  | S-84  |
| 500 MHz <sup>1</sup> H NMR spectrum of compound <b>20f</b> in CD <sub>3</sub> OD          | S-85  |
| 125 MHz <sup>13</sup> C NMR spectrum of compound <b>20f</b> in CD <sub>3</sub> OD         | S-86  |
| 500 MHz <sup>1</sup> H NMR spectrum of compound <b>20g</b> in CD <sub>3</sub> OD          | S-87  |
| 125 MHz <sup>13</sup> C NMR spectrum of compound <b>20g</b> in CD <sub>3</sub> OD         | S-88  |
| 500 MHz <sup>1</sup> H NMR spectrum of compound <b>20h</b> in CD <sub>3</sub> OD          | S-89  |
| 125 MHz <sup>13</sup> C NMR spectrum of compound <b>20h</b> in CD <sub>3</sub> OD         | S-90  |
| 500 MHz <sup>1</sup> H NMR spectrum of compound <b>20i</b> in CD <sub>3</sub> OD          | S-91  |
| 125 MHz <sup>13</sup> C NMR spectrum of compound <b>20i</b> in CD <sub>3</sub> OD         | S-92  |
| 500 MHz <sup>1</sup> H NMR spectrum of compound <b>20j</b> in CD <sub>3</sub> OD          | S-93  |
| 125 MHz <sup>13</sup> C NMR spectrum of compound <b>20j</b> in CD <sub>3</sub> OD         | S-94  |
| 500 MHz <sup>1</sup> H NMR spectrum of compound <b>21a</b> in CD <sub>3</sub> OD          | S-95  |
| 125 MHz <sup>13</sup> C NMR spectrum of compound <b>21a</b> in CD <sub>3</sub> OD         | S-96  |
| 500 MHz <sup>1</sup> H NMR spectrum of compound <b>21b</b> in CD <sub>3</sub> OD          | S-97  |
| 125 MHz <sup>13</sup> C NMR spectrum of compound <b>21b</b> in CD <sub>3</sub> OD         | S-98  |
| 500 MHz <sup>1</sup> H NMR spectrum of compound <b>21c</b> in CD <sub>3</sub> OD          | S-99  |
| 125 MHz <sup>13</sup> C NMR spectrum of compound <b>21c</b> in CD <sub>3</sub> OD         | S-100 |
| 500 MHz <sup>1</sup> H NMR spectrum of compound <b>21d</b> in CD <sub>3</sub> OD          | S-101 |
| 125 MHz <sup>13</sup> C NMR spectrum of compound <b>21d</b> in CD <sub>3</sub> OD         | S-102 |
| gCOSY spectrum of compound <b>21d</b> in CD <sub>3</sub> OD                               | S-103 |
| 500 MHz <sup>1</sup> H NMR spectrum of compound <b>21e</b> in CD <sub>3</sub> OD          | S-104 |
| 500 MHz <sup>1</sup> H NMR spectrum of compound <b>21e</b> in DMSO- <i>d</i> <sub>6</sub> | S-105 |
| 500 MHz <sup>1</sup> H NMR spectrum of compound <b>22a</b> in CD <sub>3</sub> OD          | S-106 |
| 125 MHz <sup>13</sup> C NMR spectrum of compound <b>22a</b> in CD <sub>3</sub> OD         | S-107 |
| 500 MHz <sup>1</sup> H NMR spectrum of compound <b>22b</b> in CD <sub>3</sub> OD          | S-108 |
| 125 MHz <sup>13</sup> C NMR spectrum of compound <b>22b</b> in CD <sub>3</sub> OD         | S-109 |
| gCOSY spectrum of compound <b>22b</b> in CD <sub>3</sub> OD                               | S-110 |
| gHMQC spectrum of compound <b>22b</b> in CD <sub>3</sub> OD                               | S-111 |
| 500 MHz <sup>1</sup> H NMR spectrum of compound <b>22c</b> in CD <sub>3</sub> OD          | S-112 |
| 125 MHz <sup>13</sup> C NMR spectrum of compound <b>22c</b> in CD <sub>3</sub> OD         | S-113 |
| 500 MHz <sup>1</sup> H NMR spectrum of compound <b>22d</b> in CD <sub>3</sub> OD          | S-114 |
| 125 MHz <sup>13</sup> C NMR spectrum of compound <b>22d</b> in CD <sub>3</sub> OD         | S-115 |
| 500 MHz <sup>1</sup> H NMR spectrum of compound <b>23a</b> in CD <sub>3</sub> OD          | S-116 |
| 125 MHz <sup>13</sup> C NMR spectrum of compound <b>23a</b> in CD <sub>3</sub> OD         | S-117 |
| 500 MHz <sup>1</sup> H NMR spectrum of compound <b>23b</b> in CD <sub>3</sub> OD          | S-118 |
| 125 MHz <sup>13</sup> C NMR spectrum of compound <b>23b</b> in CD <sub>3</sub> OD         | S-119 |
| 500 MHz <sup>1</sup> H NMR spectrum of compound <b>24</b> in CD <sub>3</sub> OD           | S-120 |
| 125 MHz <sup>13</sup> C NMR spectrum of compound <b>24</b> in CD <sub>3</sub> OD          | S-121 |
| 500 MHz <sup>1</sup> H NMR spectrum of compound <b>25a</b> in CDCl <sub>3</sub>           | S-122 |
| 125 MHz <sup>13</sup> C NMR spectrum of compound <b>25a</b> in CDCl <sub>3</sub>          | S-123 |
| 500 MHz <sup>1</sup> H NMR spectrum of compound <b>25b</b> in CDCl <sub>3</sub>           | S-124 |

|                                                                                       |       |
|---------------------------------------------------------------------------------------|-------|
| 125 MHz $^{13}\text{C}$ NMR spectrum of compound <b>25b</b> in $\text{CDCl}_3$        | S-125 |
| 500 MHz $^1\text{H}$ NMR spectrum of compound <b>26a</b> in $\text{CD}_3\text{OD}$    | S-126 |
| 125 MHz $^{13}\text{C}$ NMR spectrum of compound <b>26a</b> in $\text{CD}_3\text{OD}$ | S-127 |
| 500 MHz $^1\text{H}$ NMR spectrum of compound <b>26b</b> in $\text{CD}_3\text{OD}$    | S-128 |
| 125 MHz $^{13}\text{C}$ NMR spectrum of compound <b>26b</b> in $\text{CD}_3\text{OD}$ | S-129 |
| 500 MHz $^1\text{H}$ NMR spectrum of compound <b>26c</b> in $\text{CD}_3\text{OD}$    | S-130 |
| 125 MHz $^{13}\text{C}$ NMR spectrum of compound <b>26c</b> in $\text{CD}_3\text{OD}$ | S-131 |
| gCOSY spectrum of compound <b>26c</b> in $\text{CD}_3\text{OD}$                       | S-132 |
| 500 MHz $^1\text{H}$ NMR spectrum of compound <b>26d</b> in $\text{CD}_3\text{OD}$    | S-133 |
| 125 MHz $^{13}\text{C}$ NMR spectrum of compound <b>26d</b> in $\text{CD}_3\text{OD}$ | S-134 |

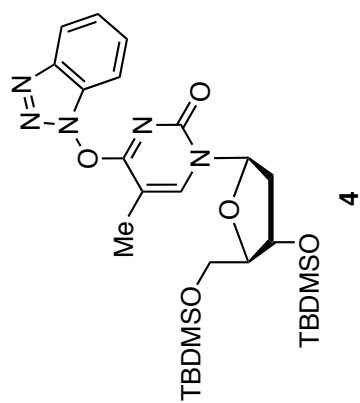

4

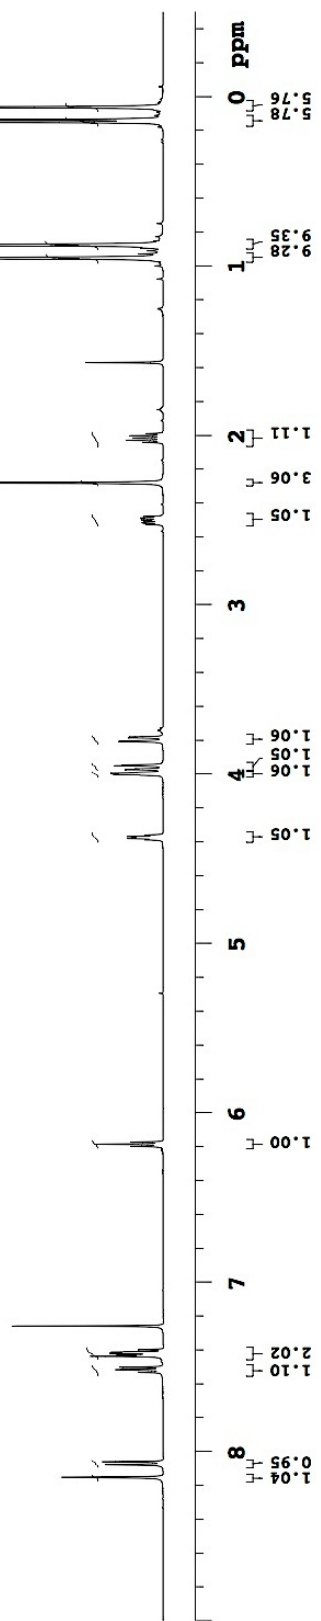

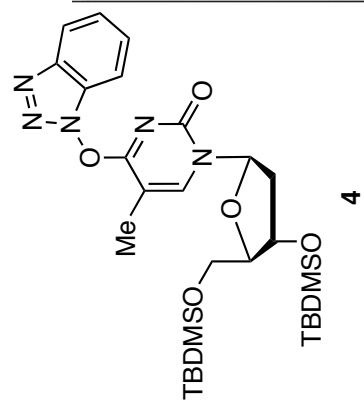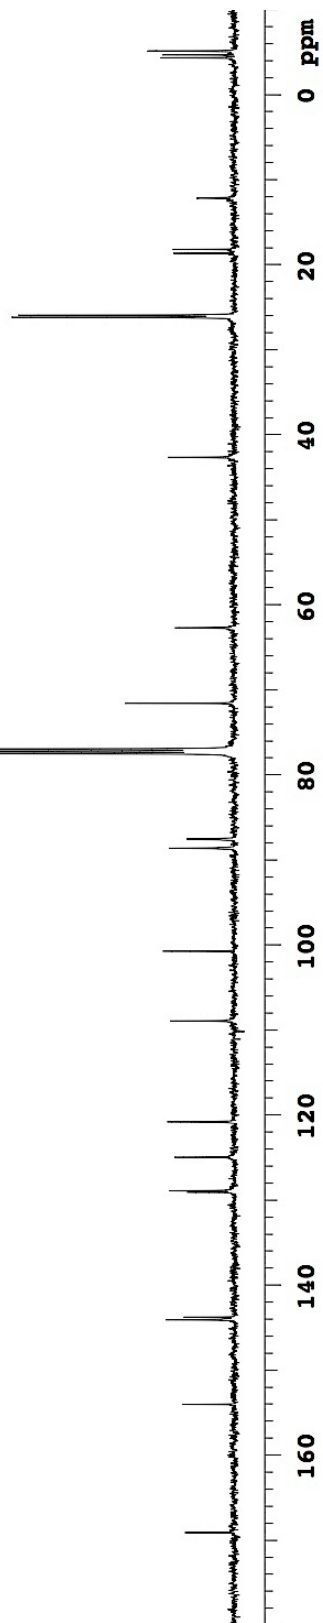

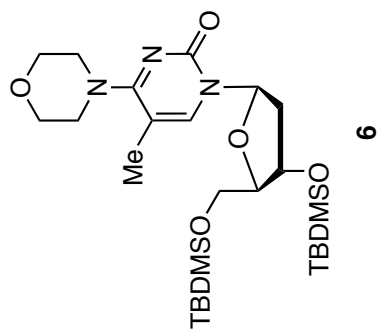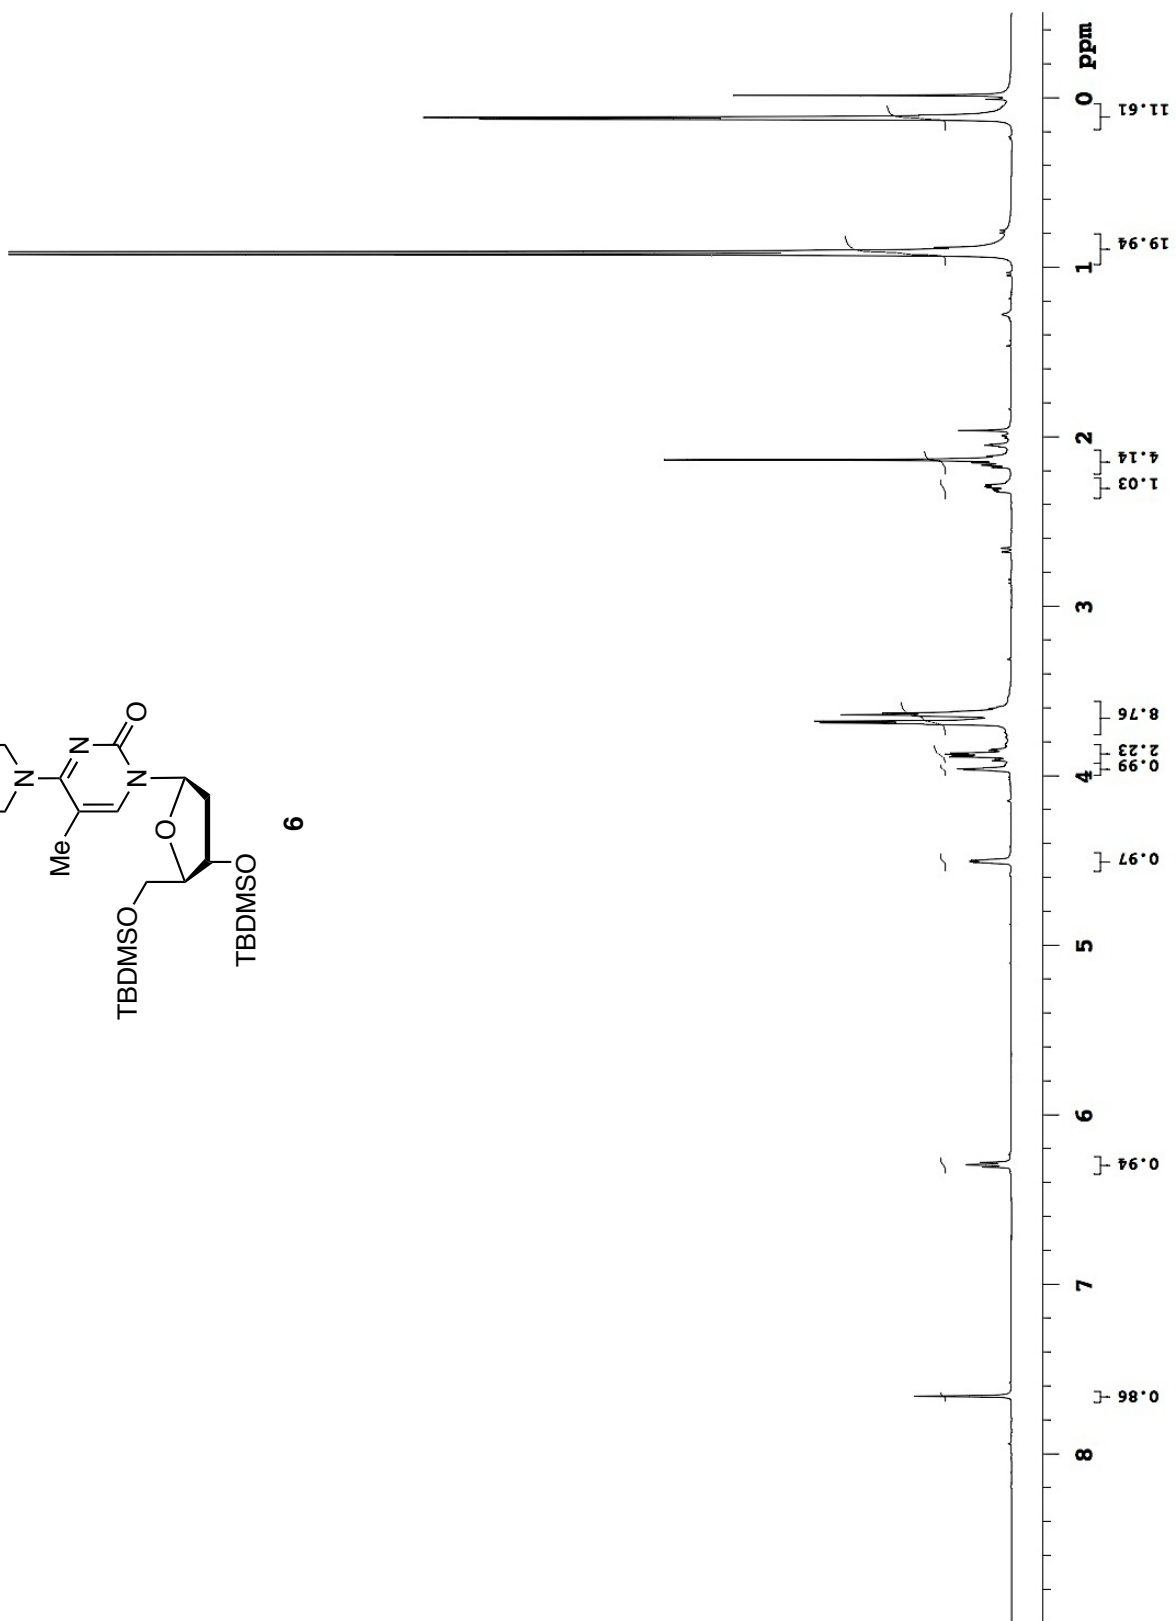

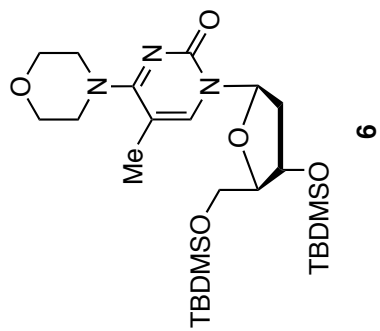

6

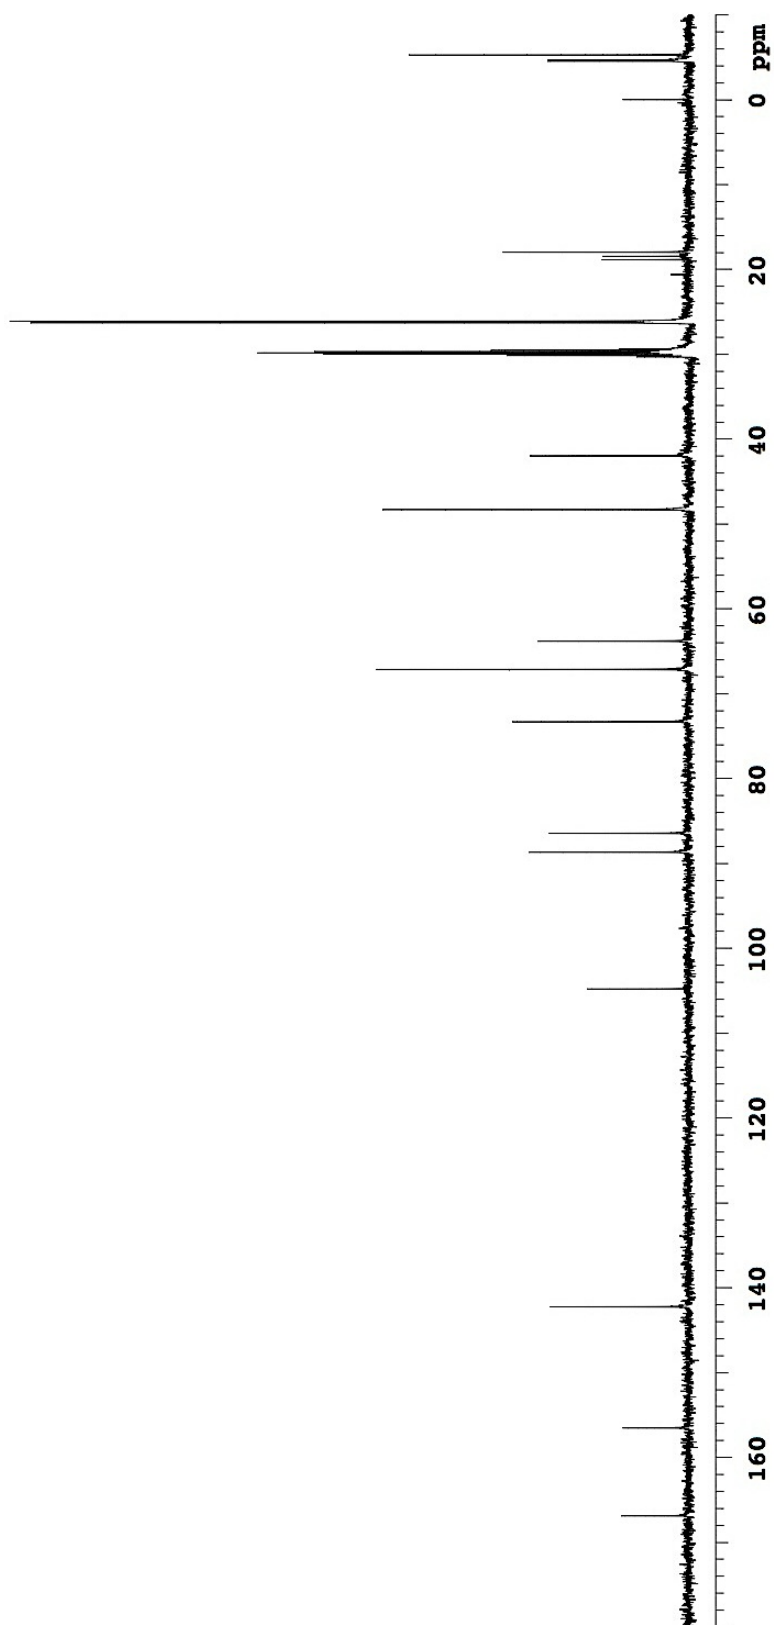



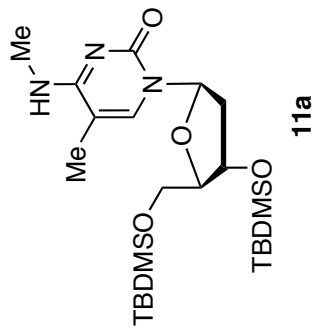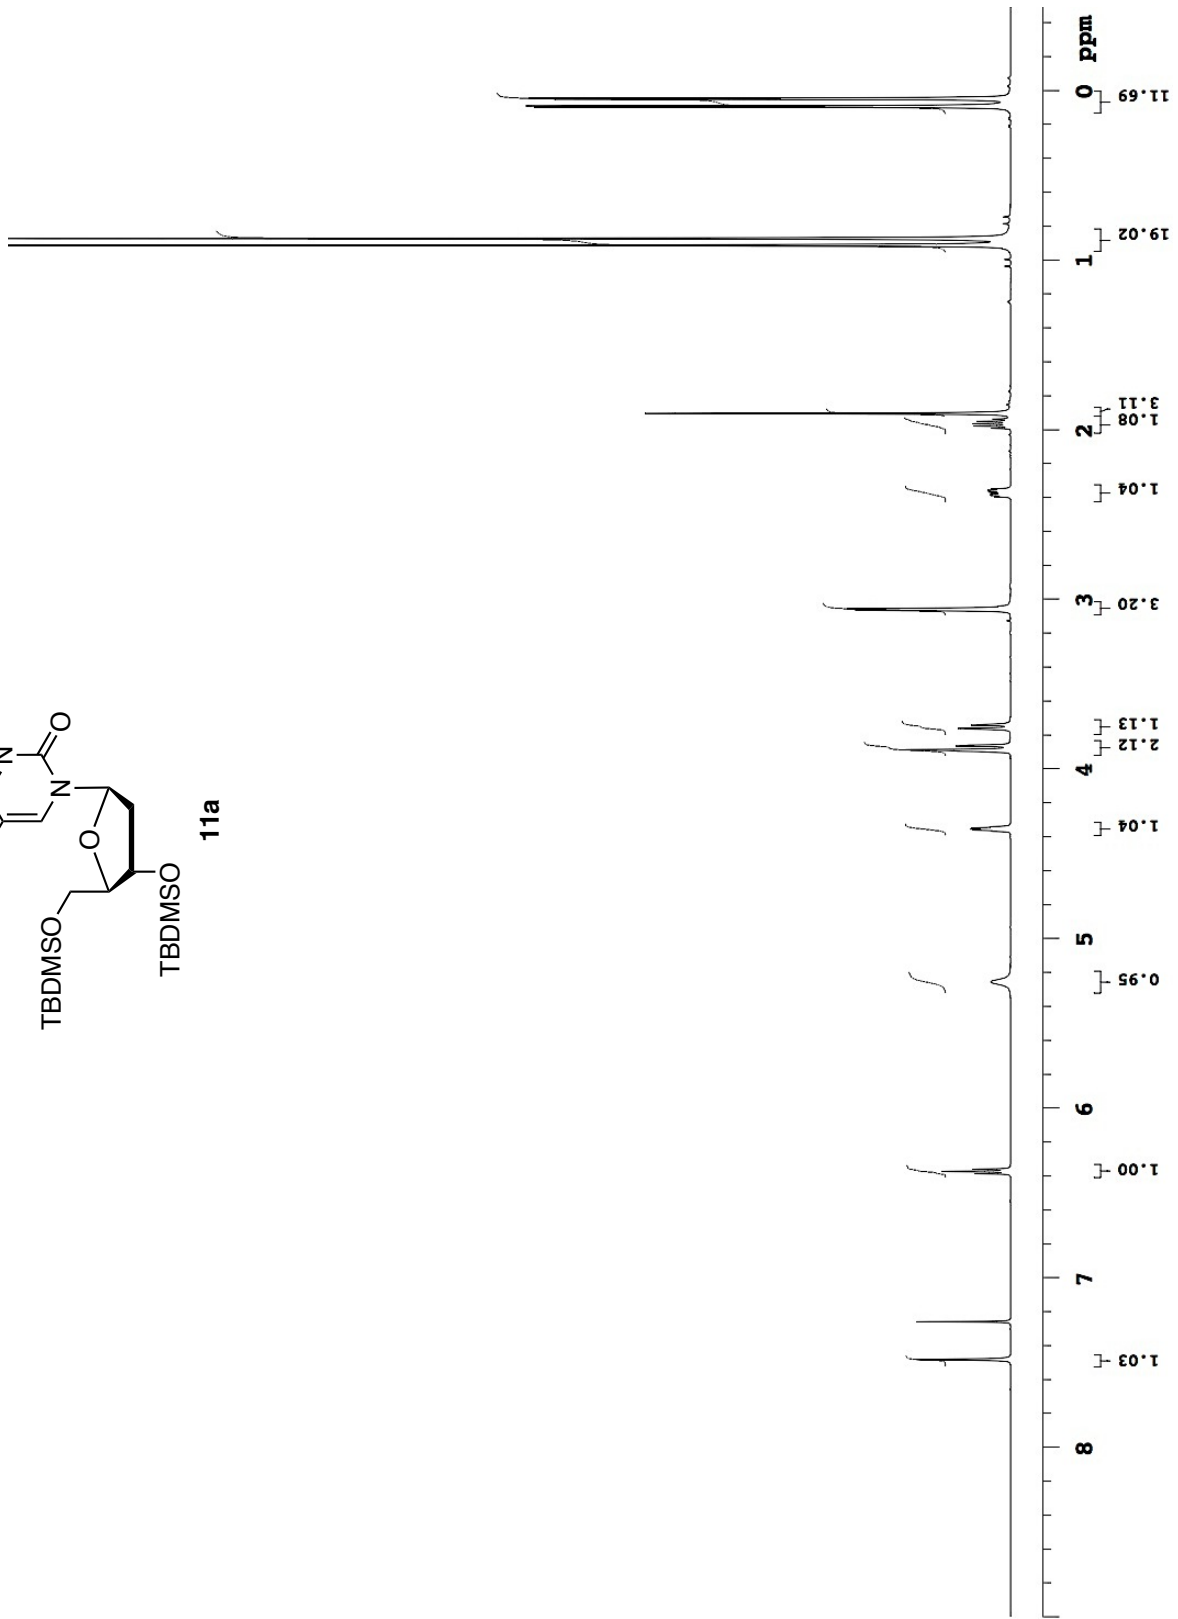

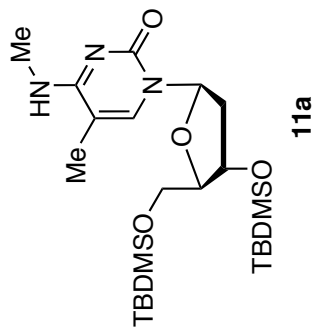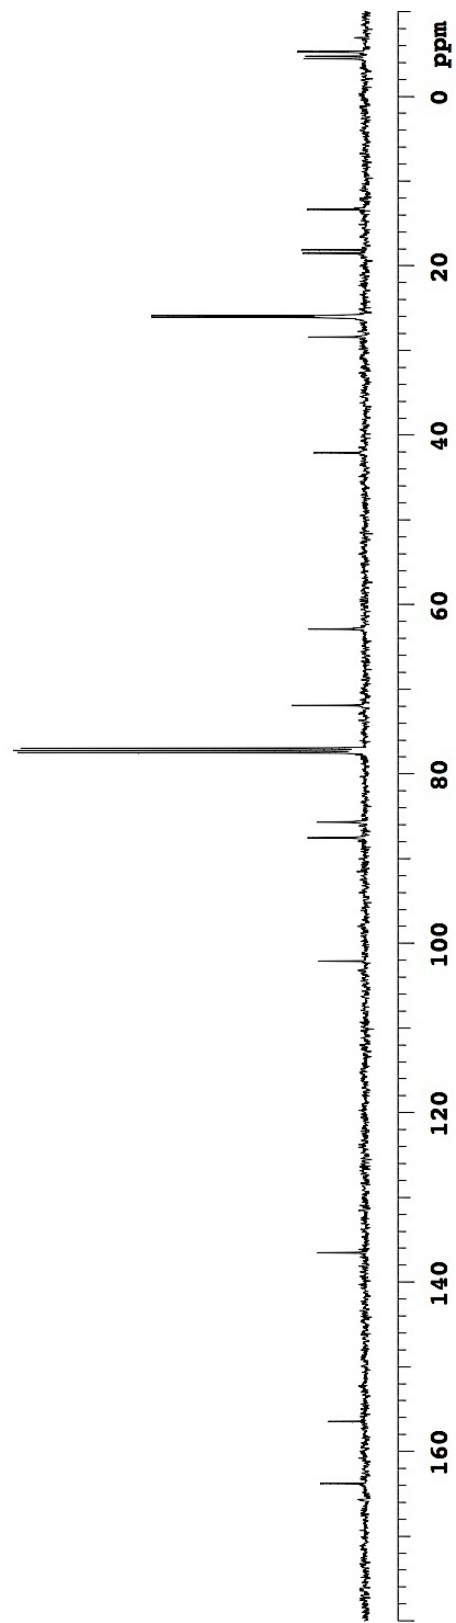

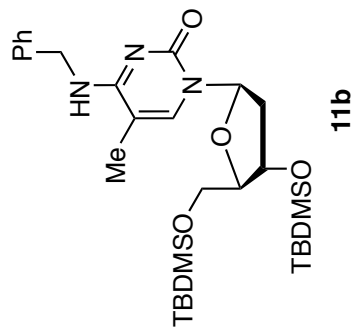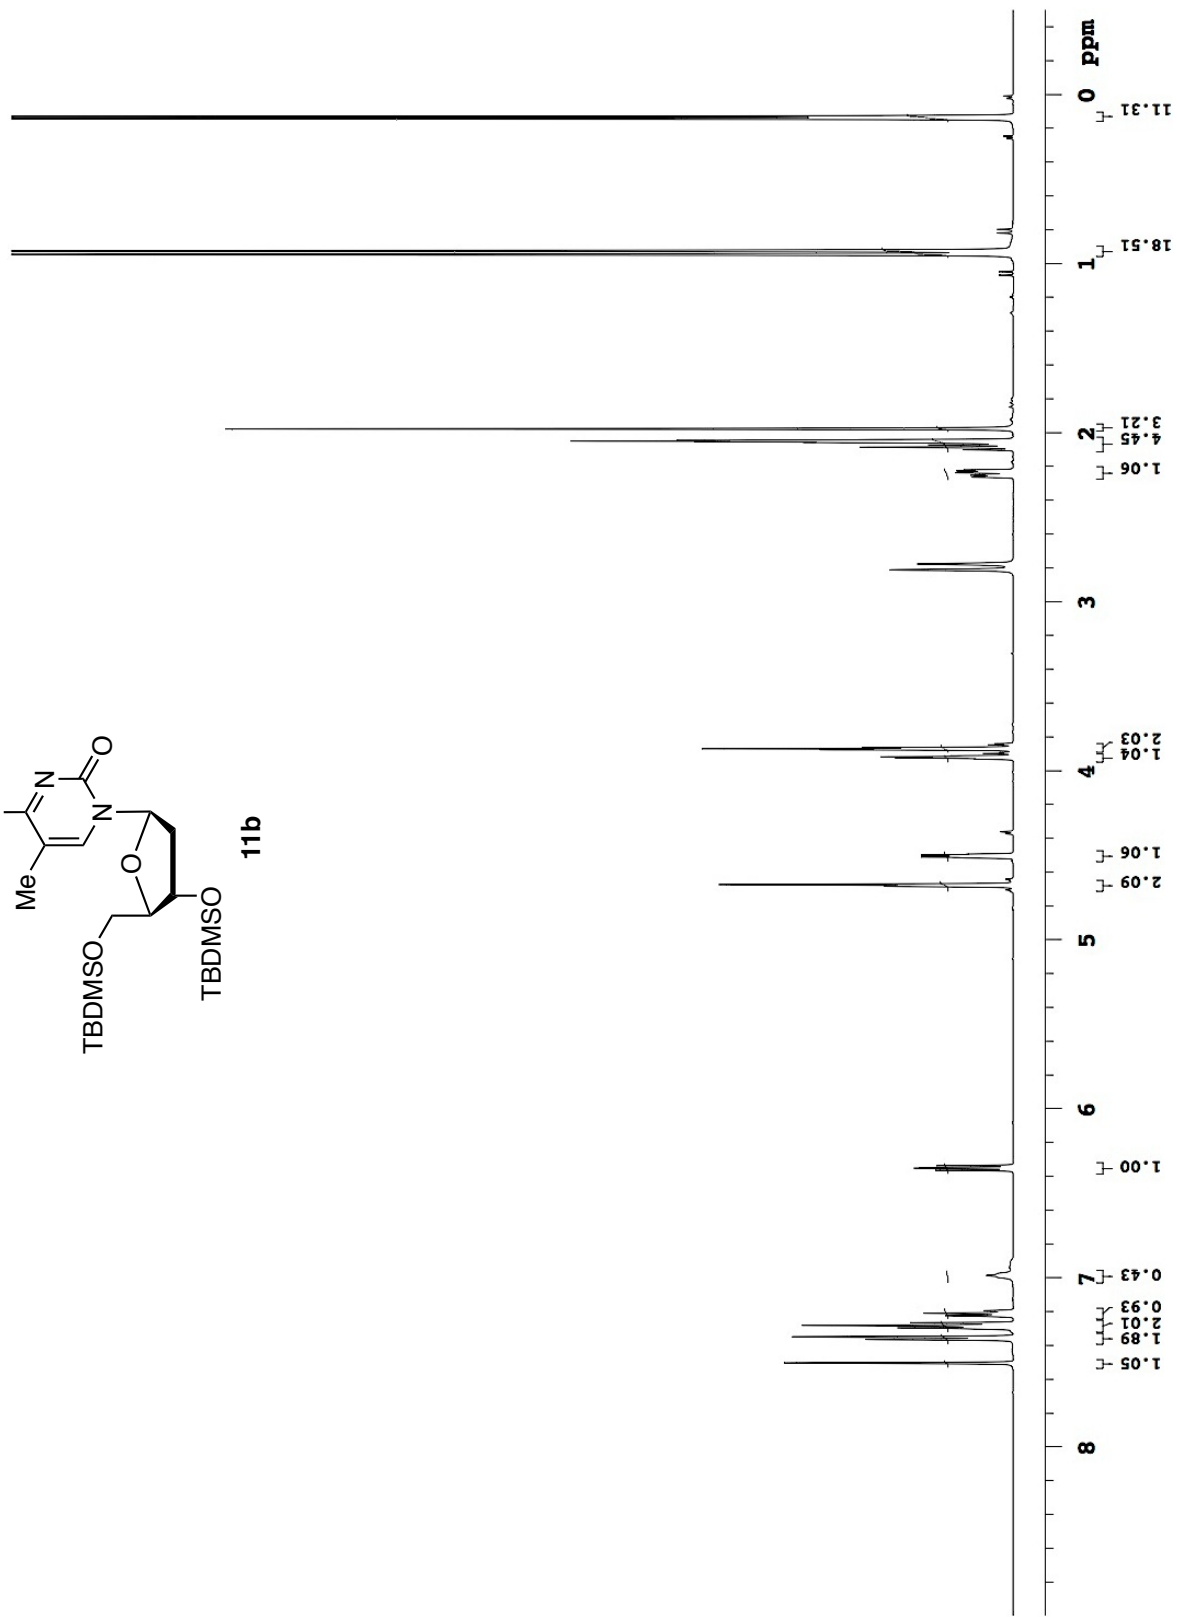

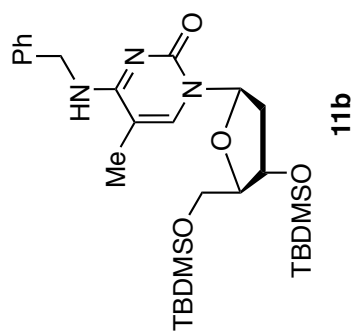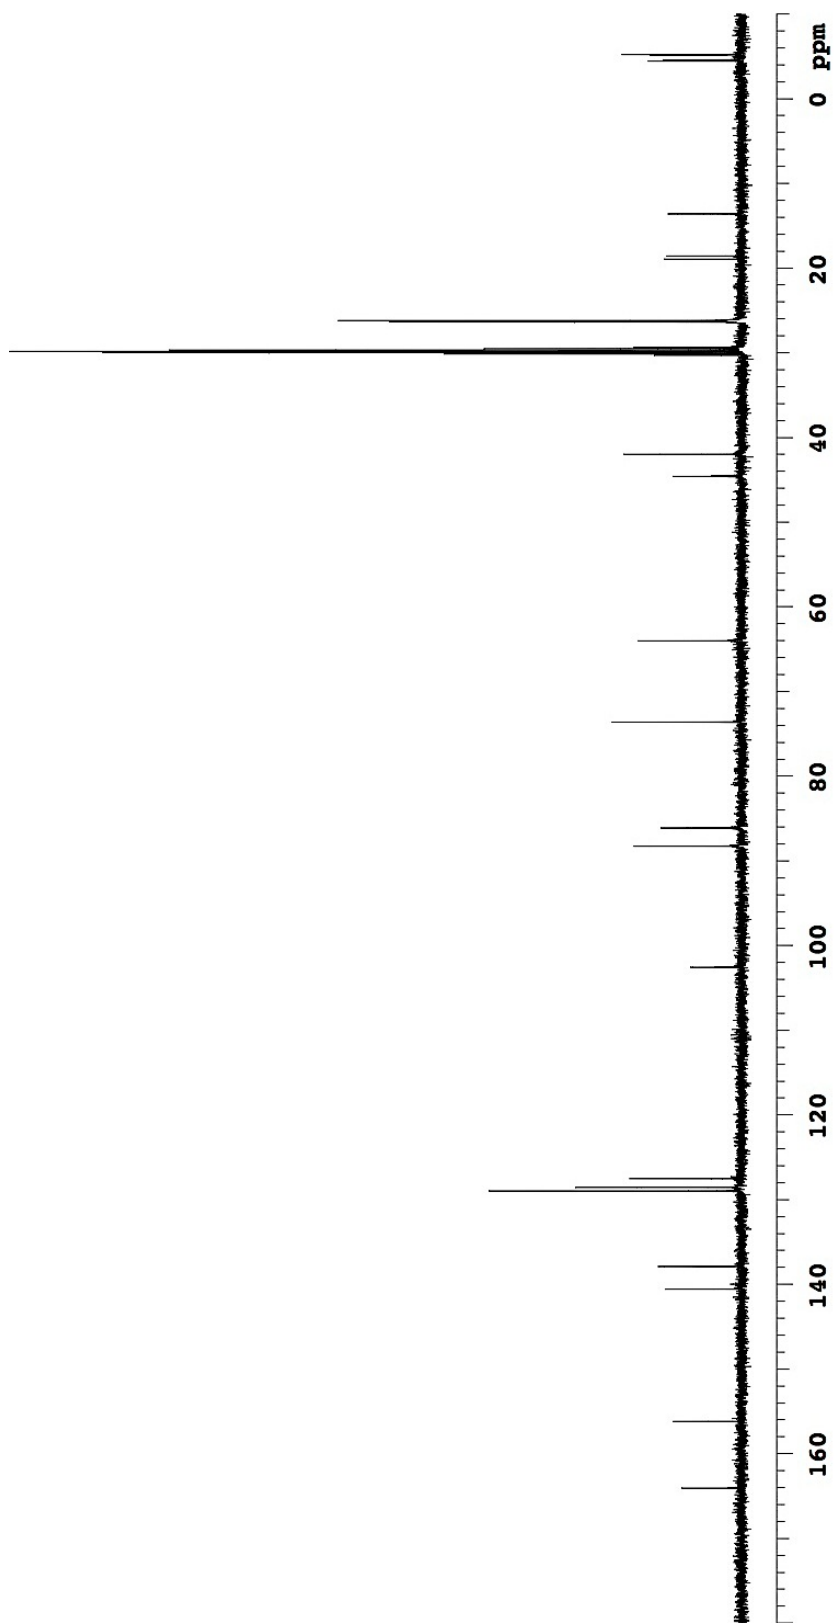

gCOSY spectrum of compound **11b** in acetone- $d_6$

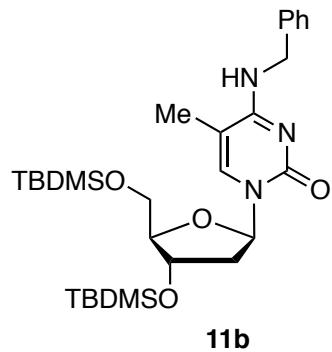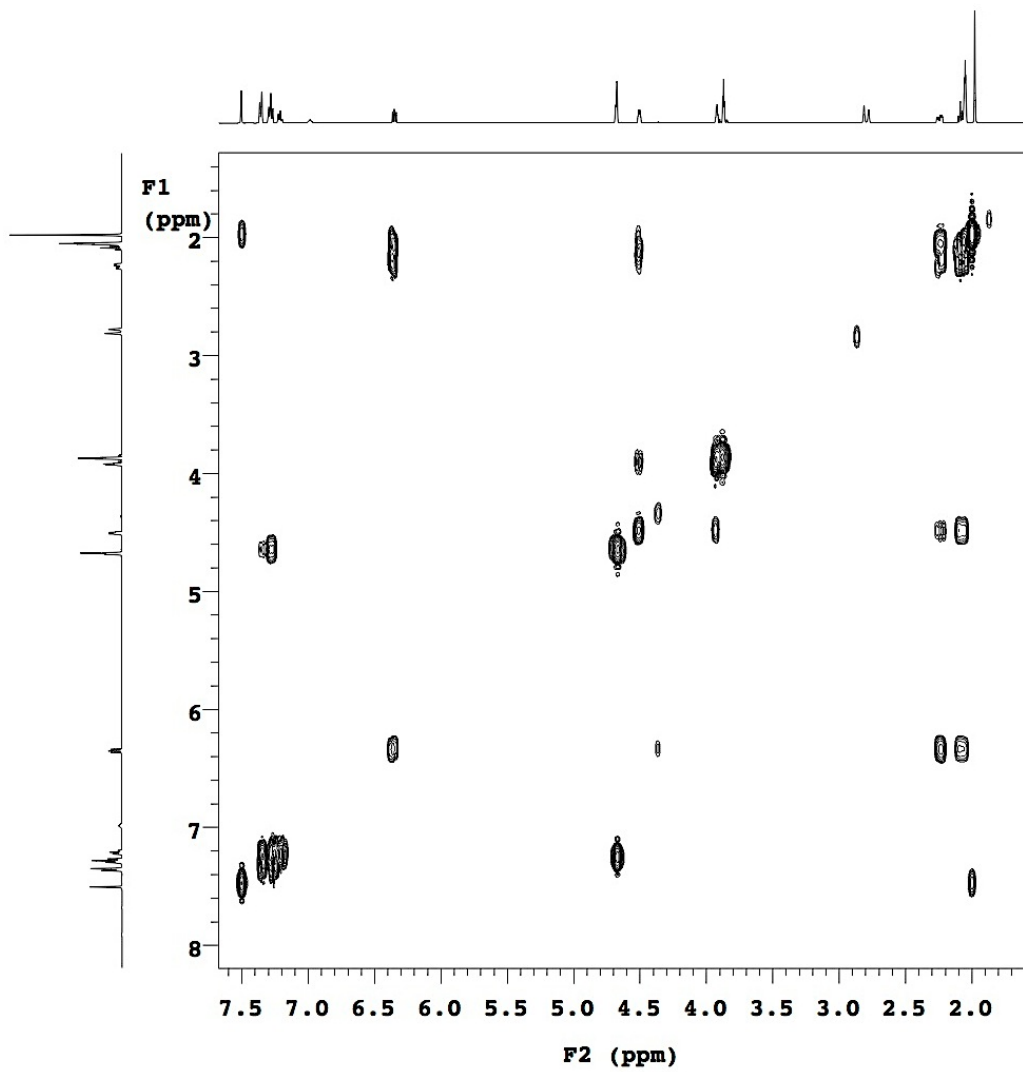

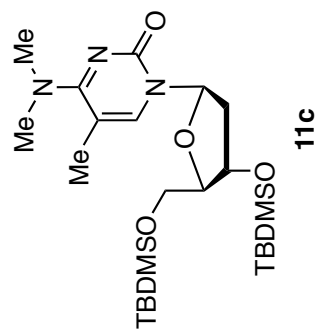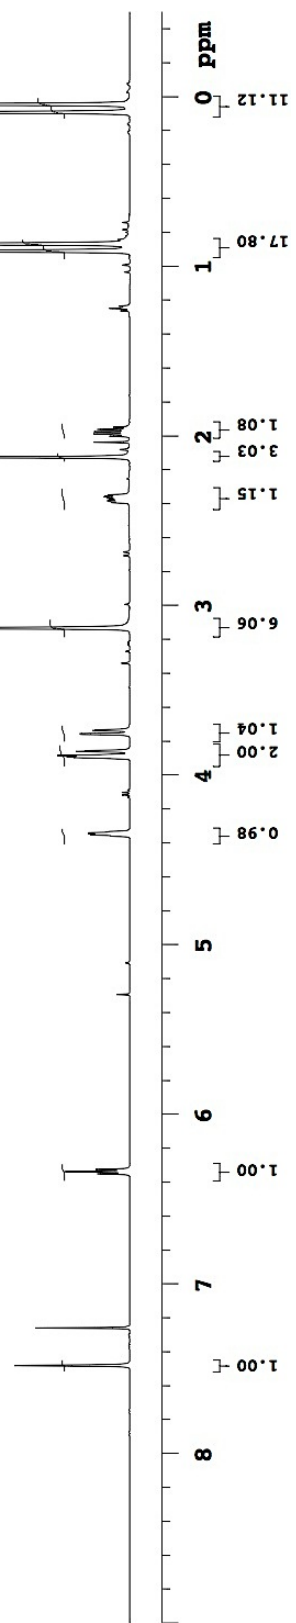

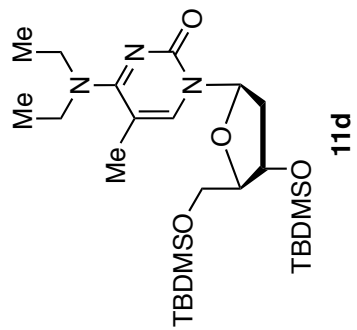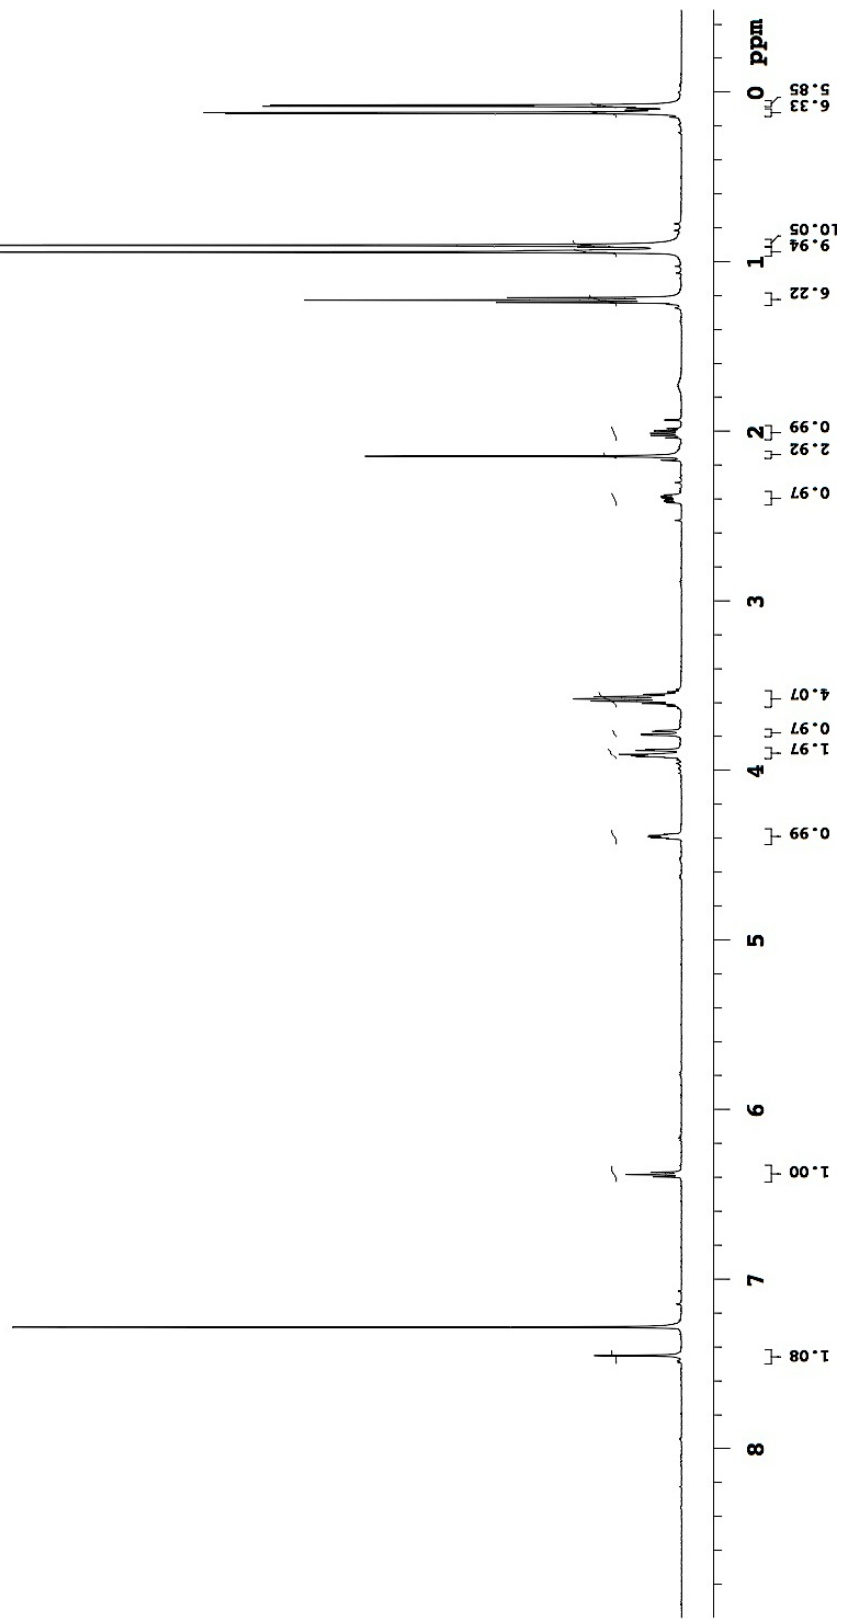

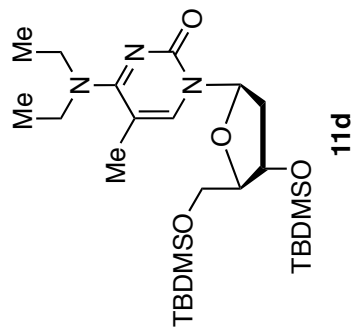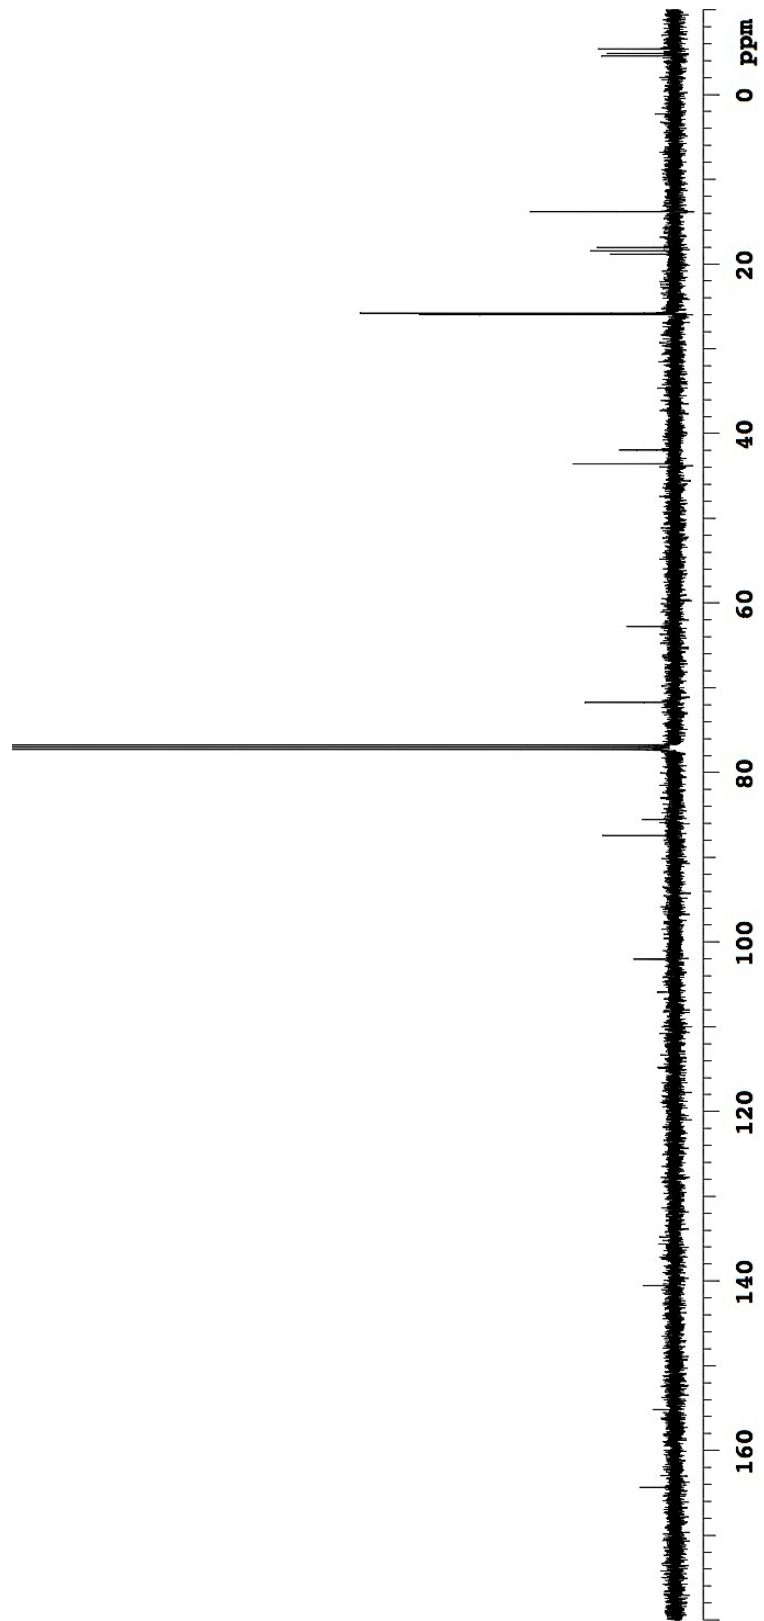



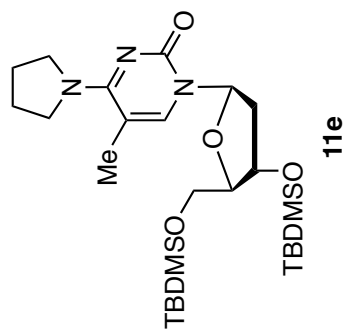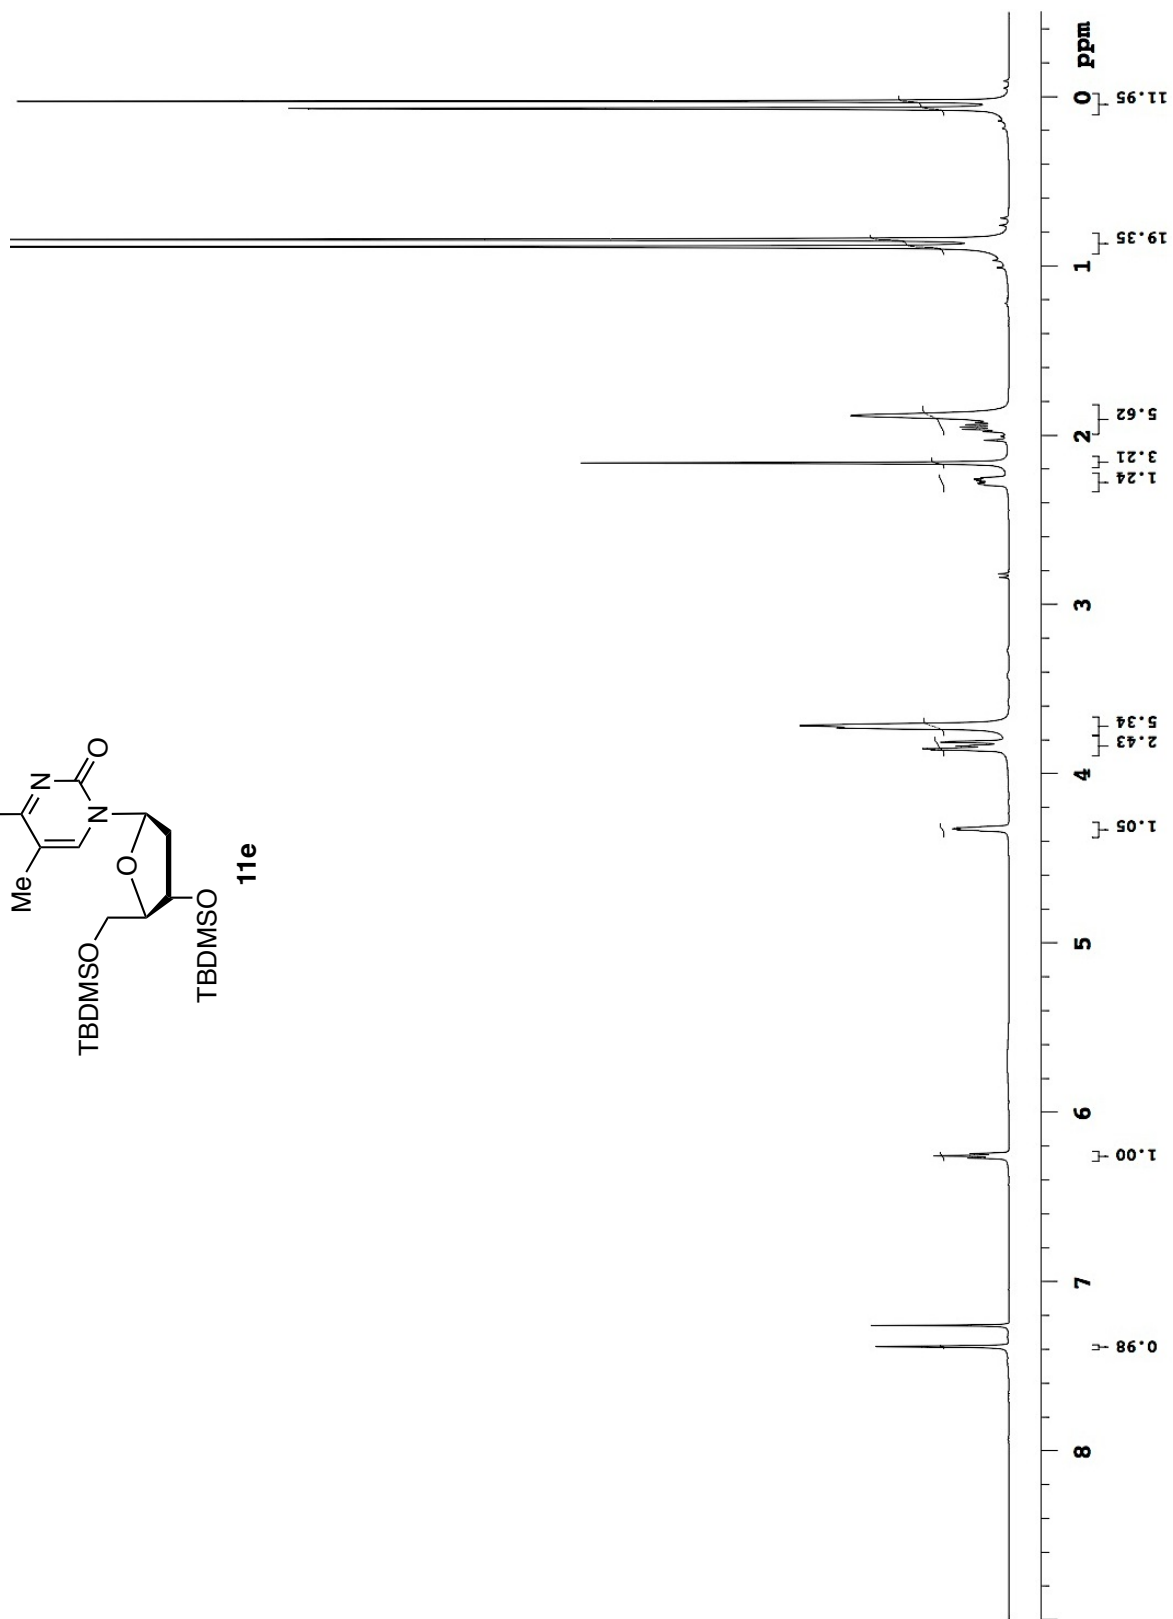

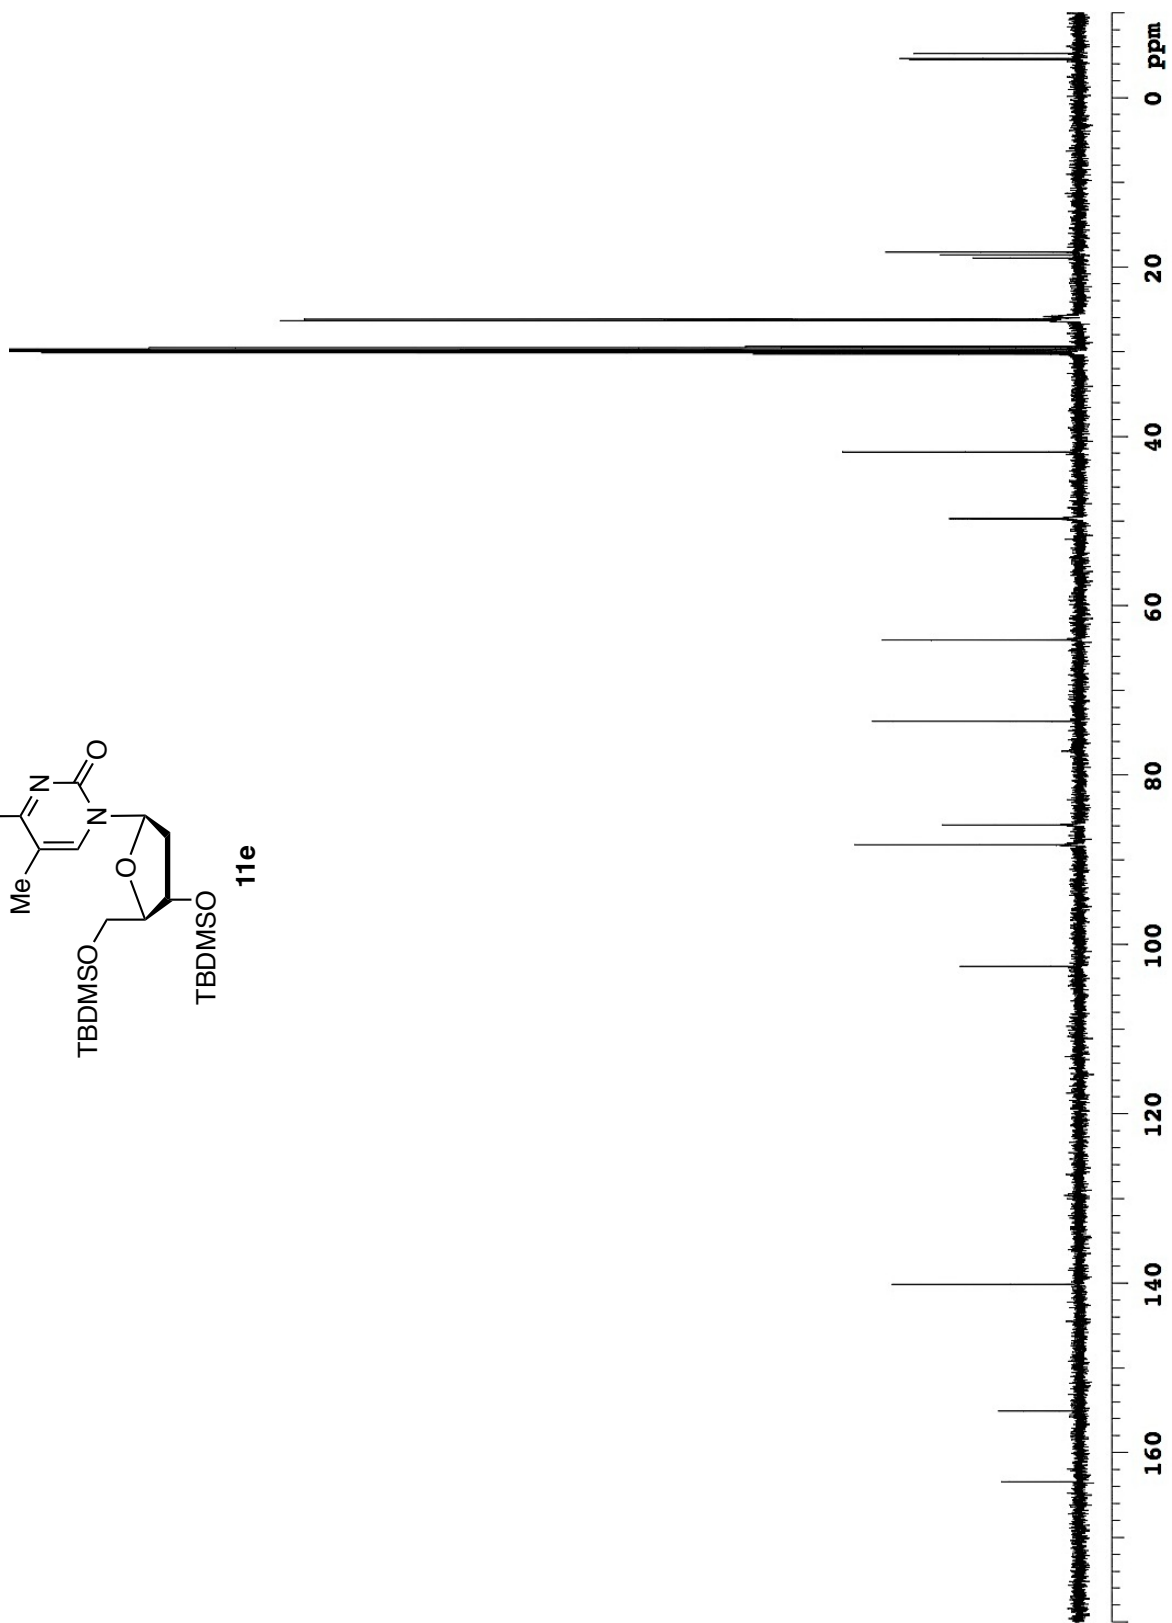

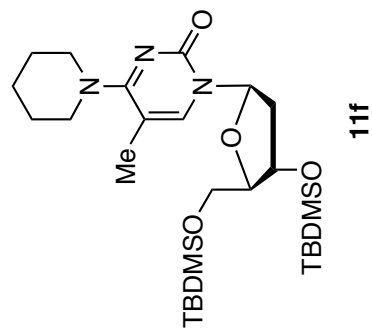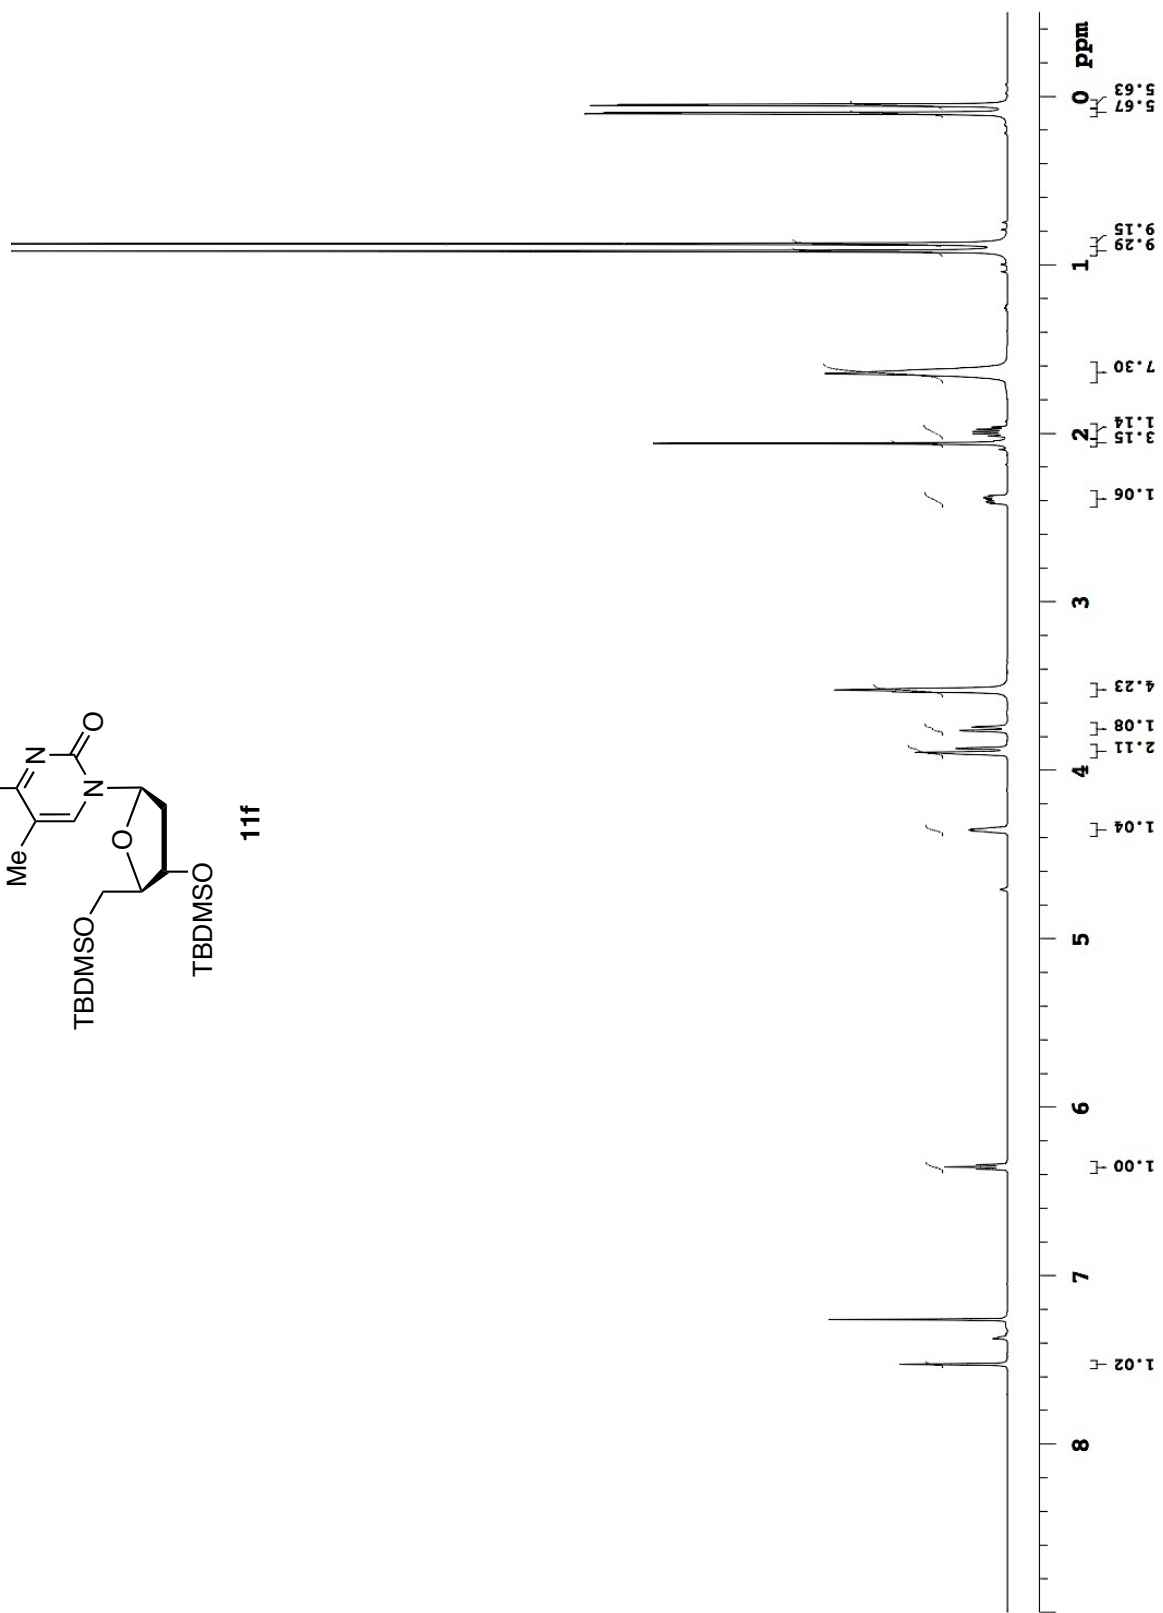

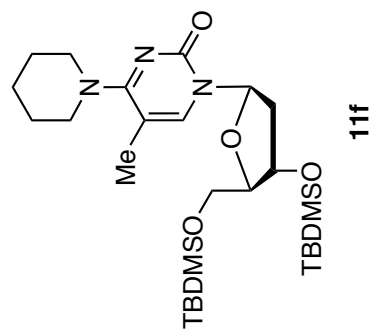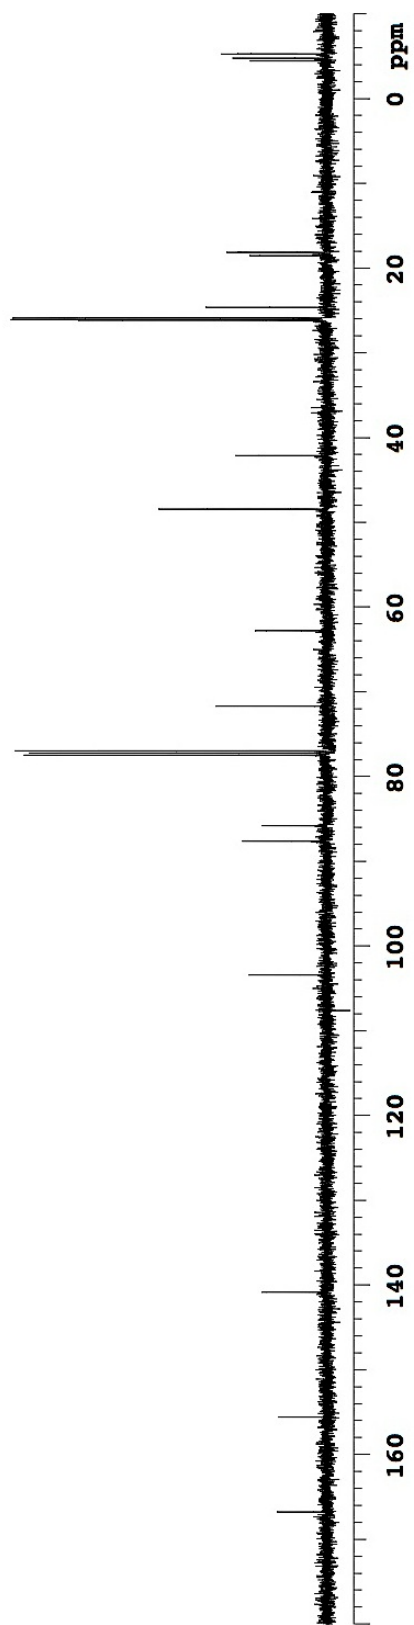

gCOSY spectrum of compound **11f** in CDCl<sub>3</sub>

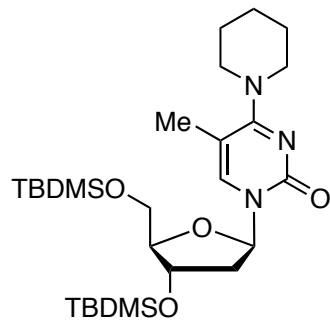

**11f**

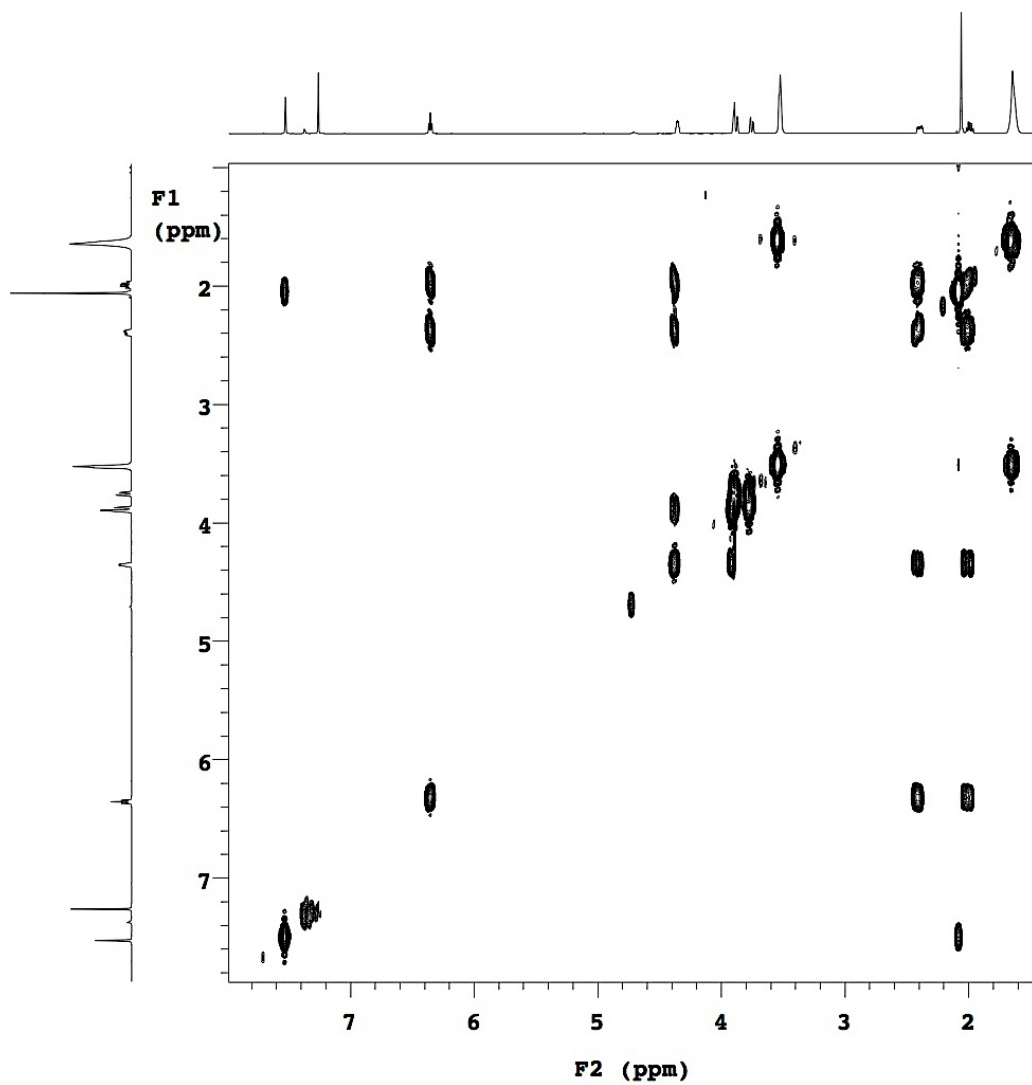

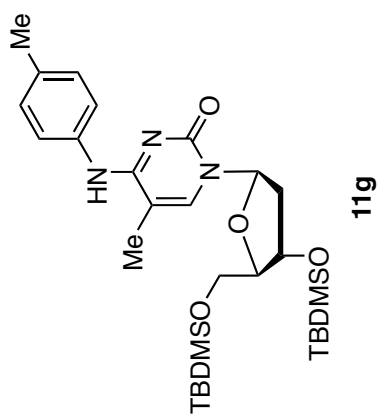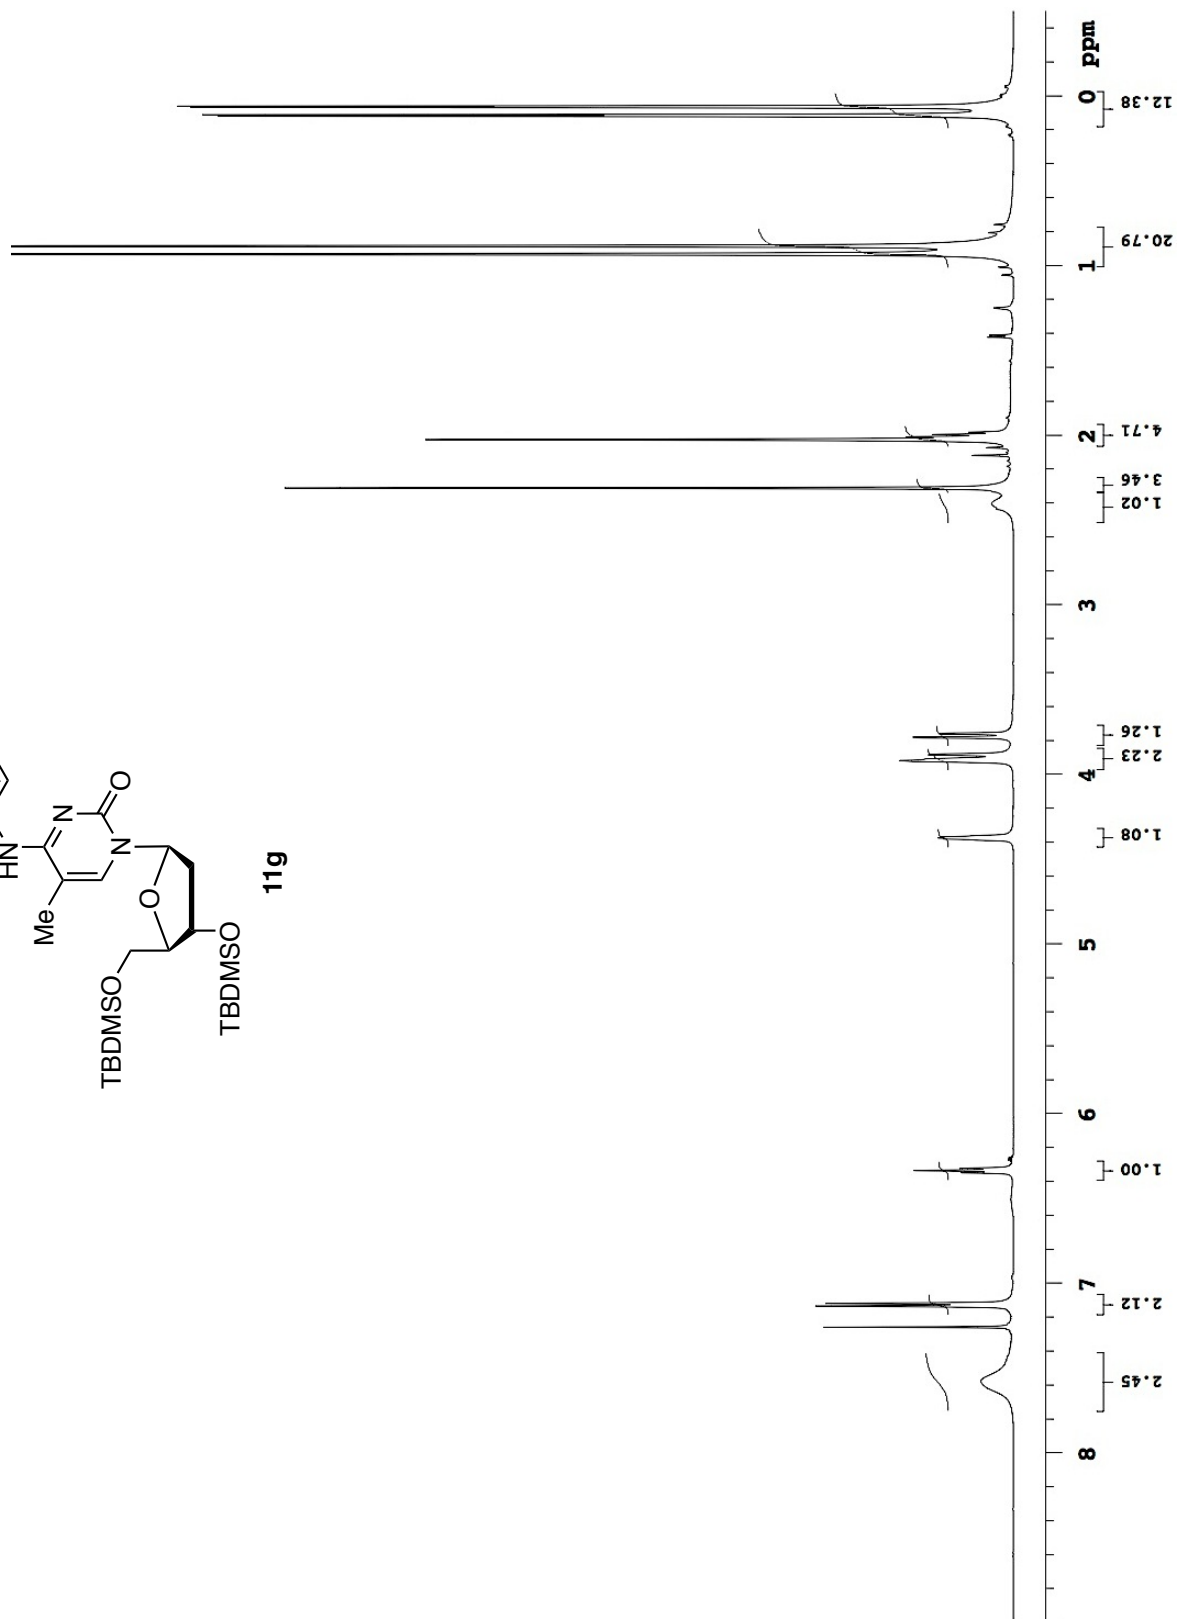

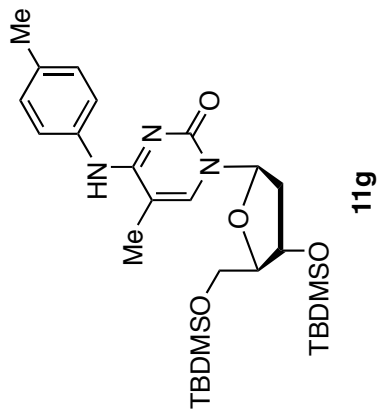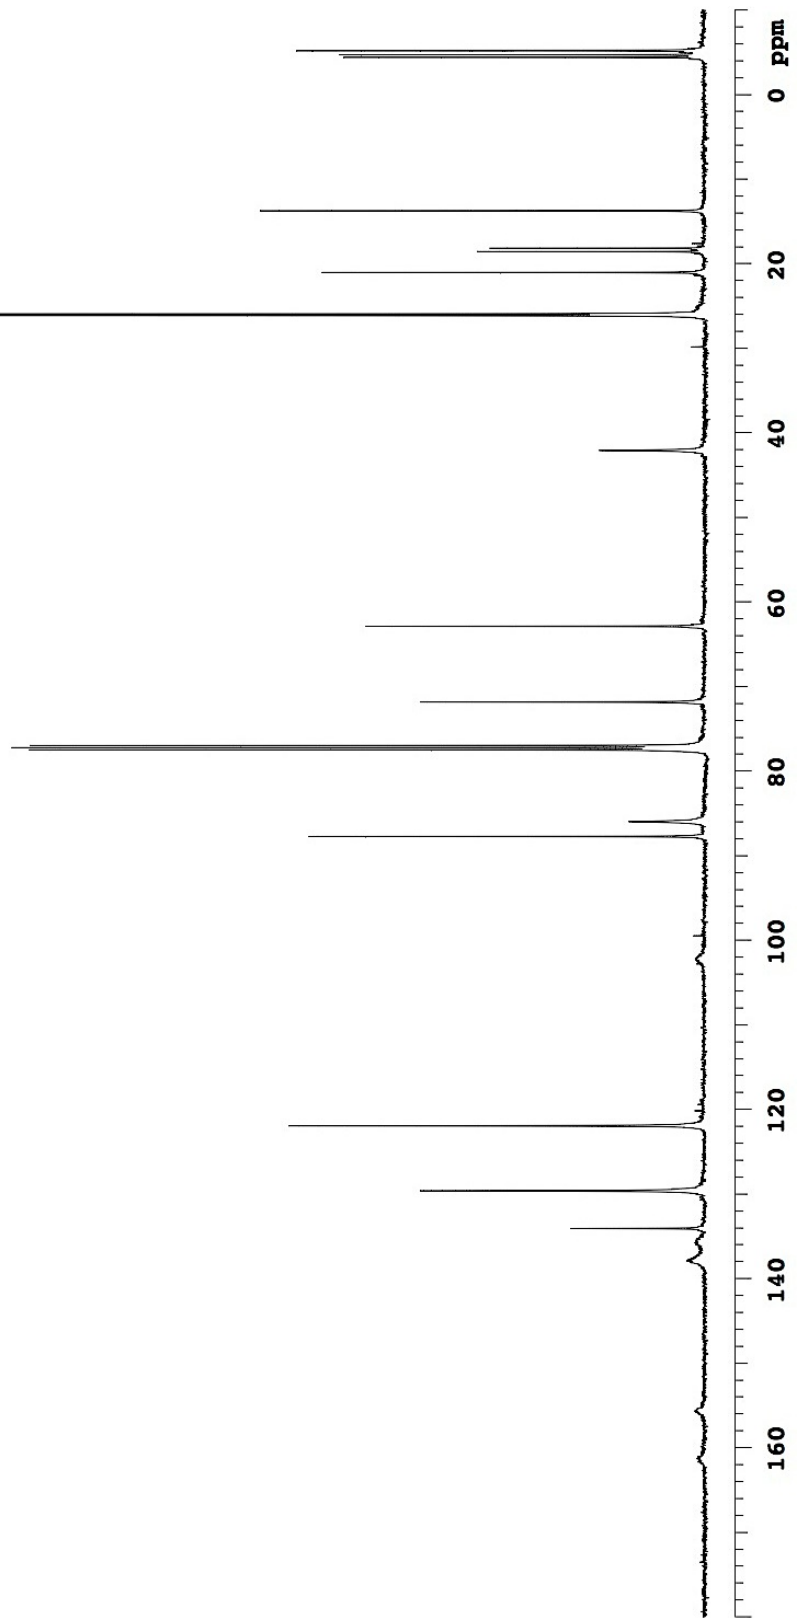

gCOSY spectrum of compound **11g** in CDCl<sub>3</sub>

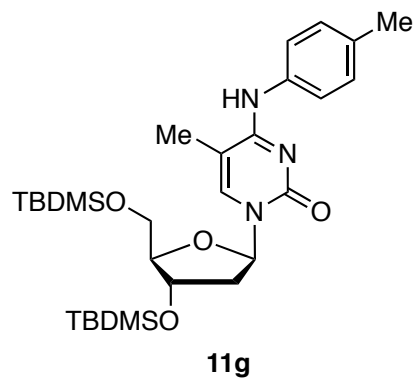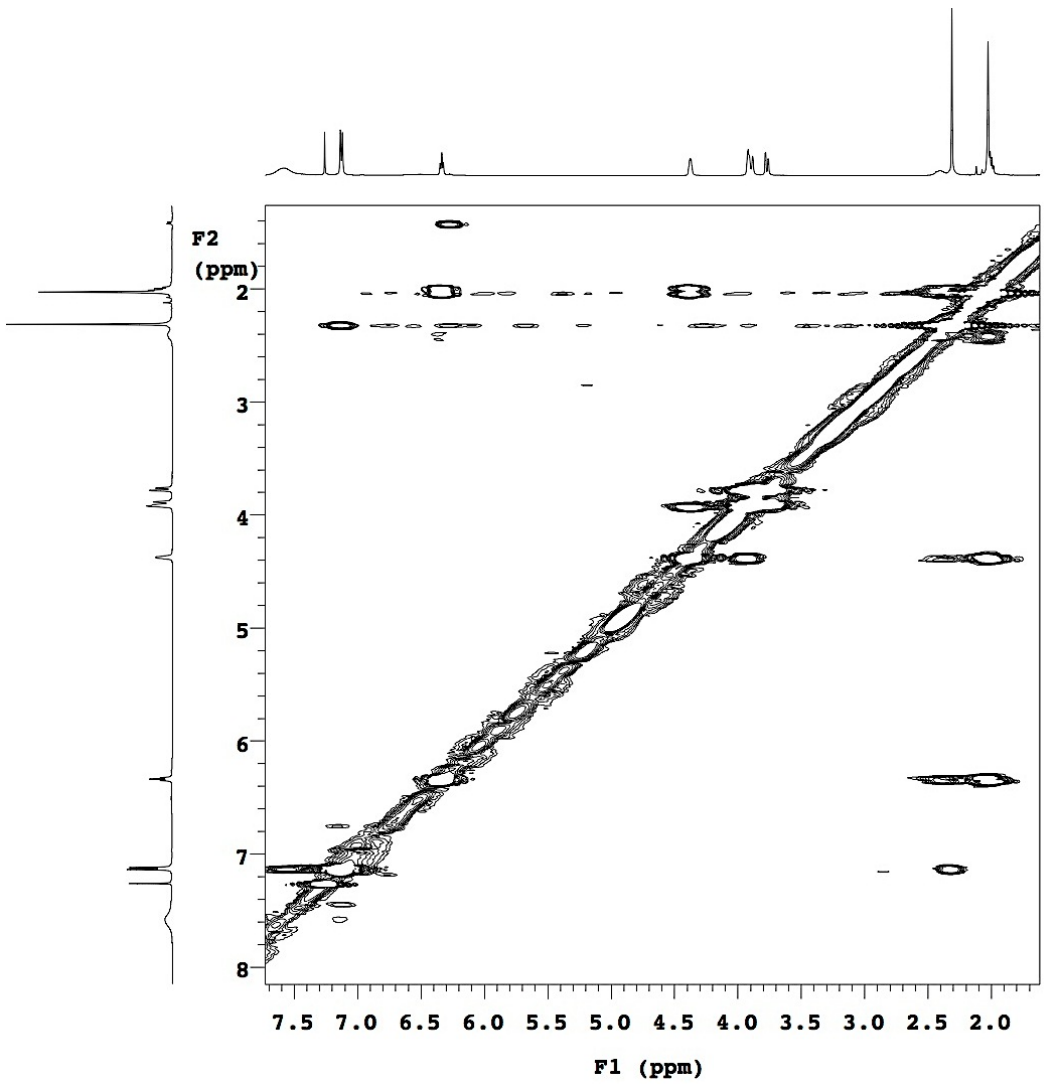



Expansion of gCOSY spectrum of compound **11g** in CDCl<sub>3</sub>

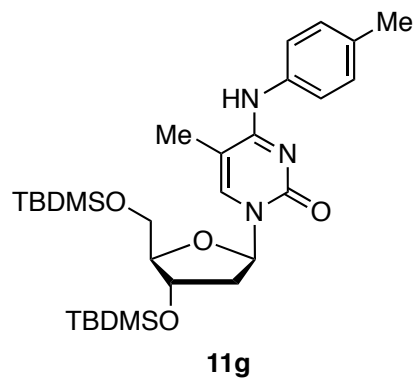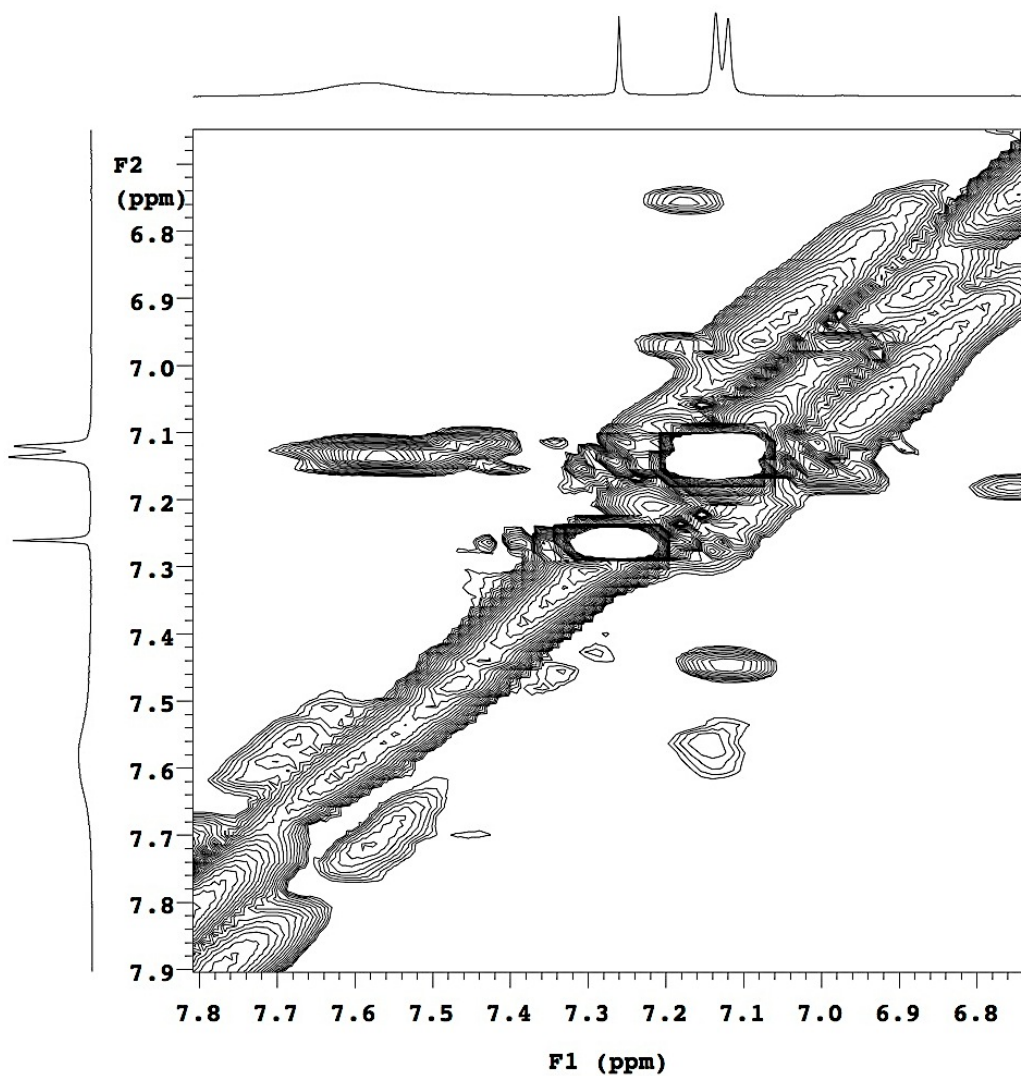

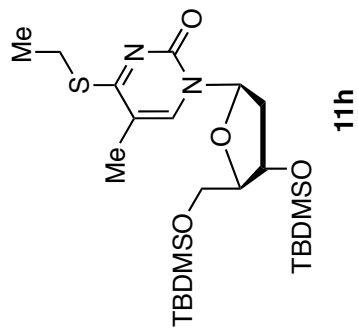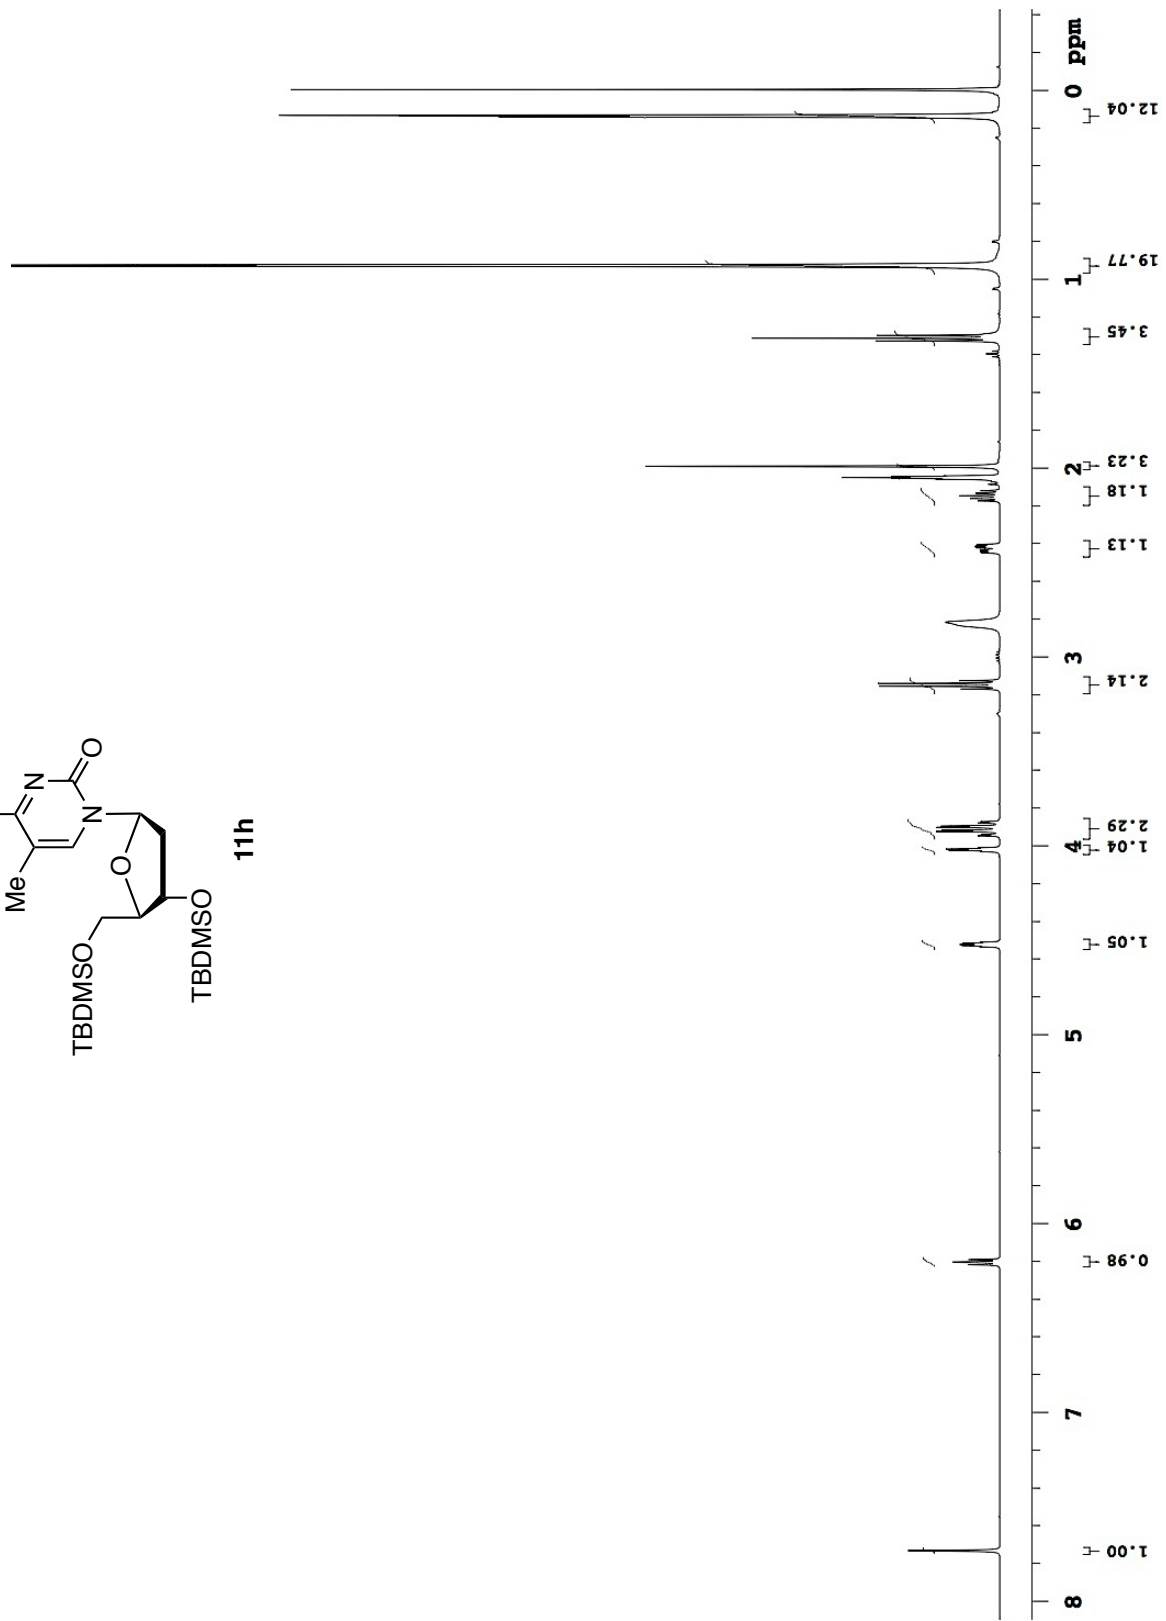

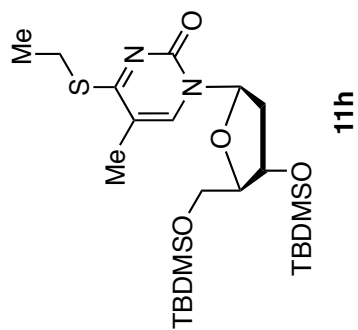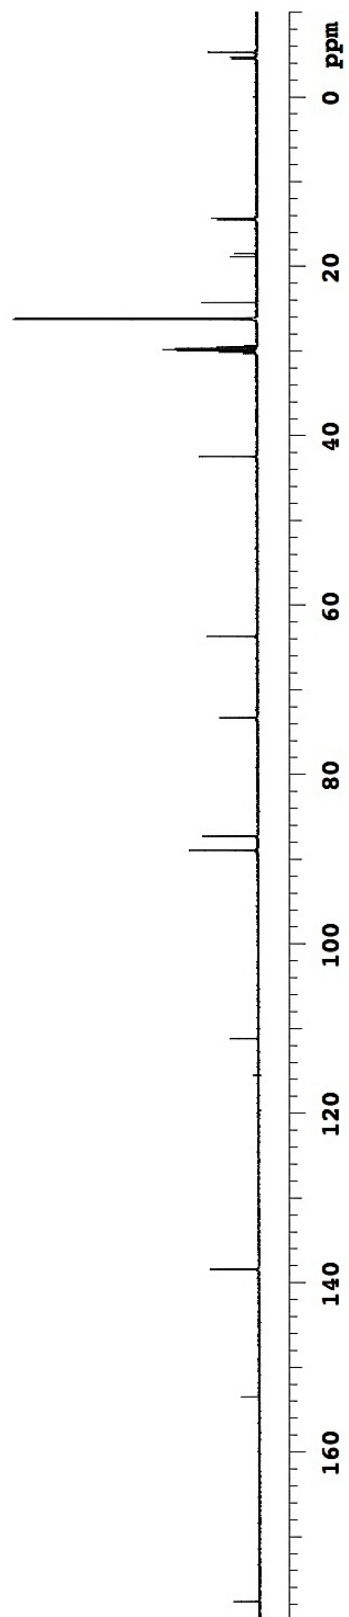

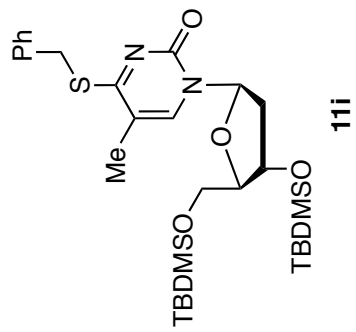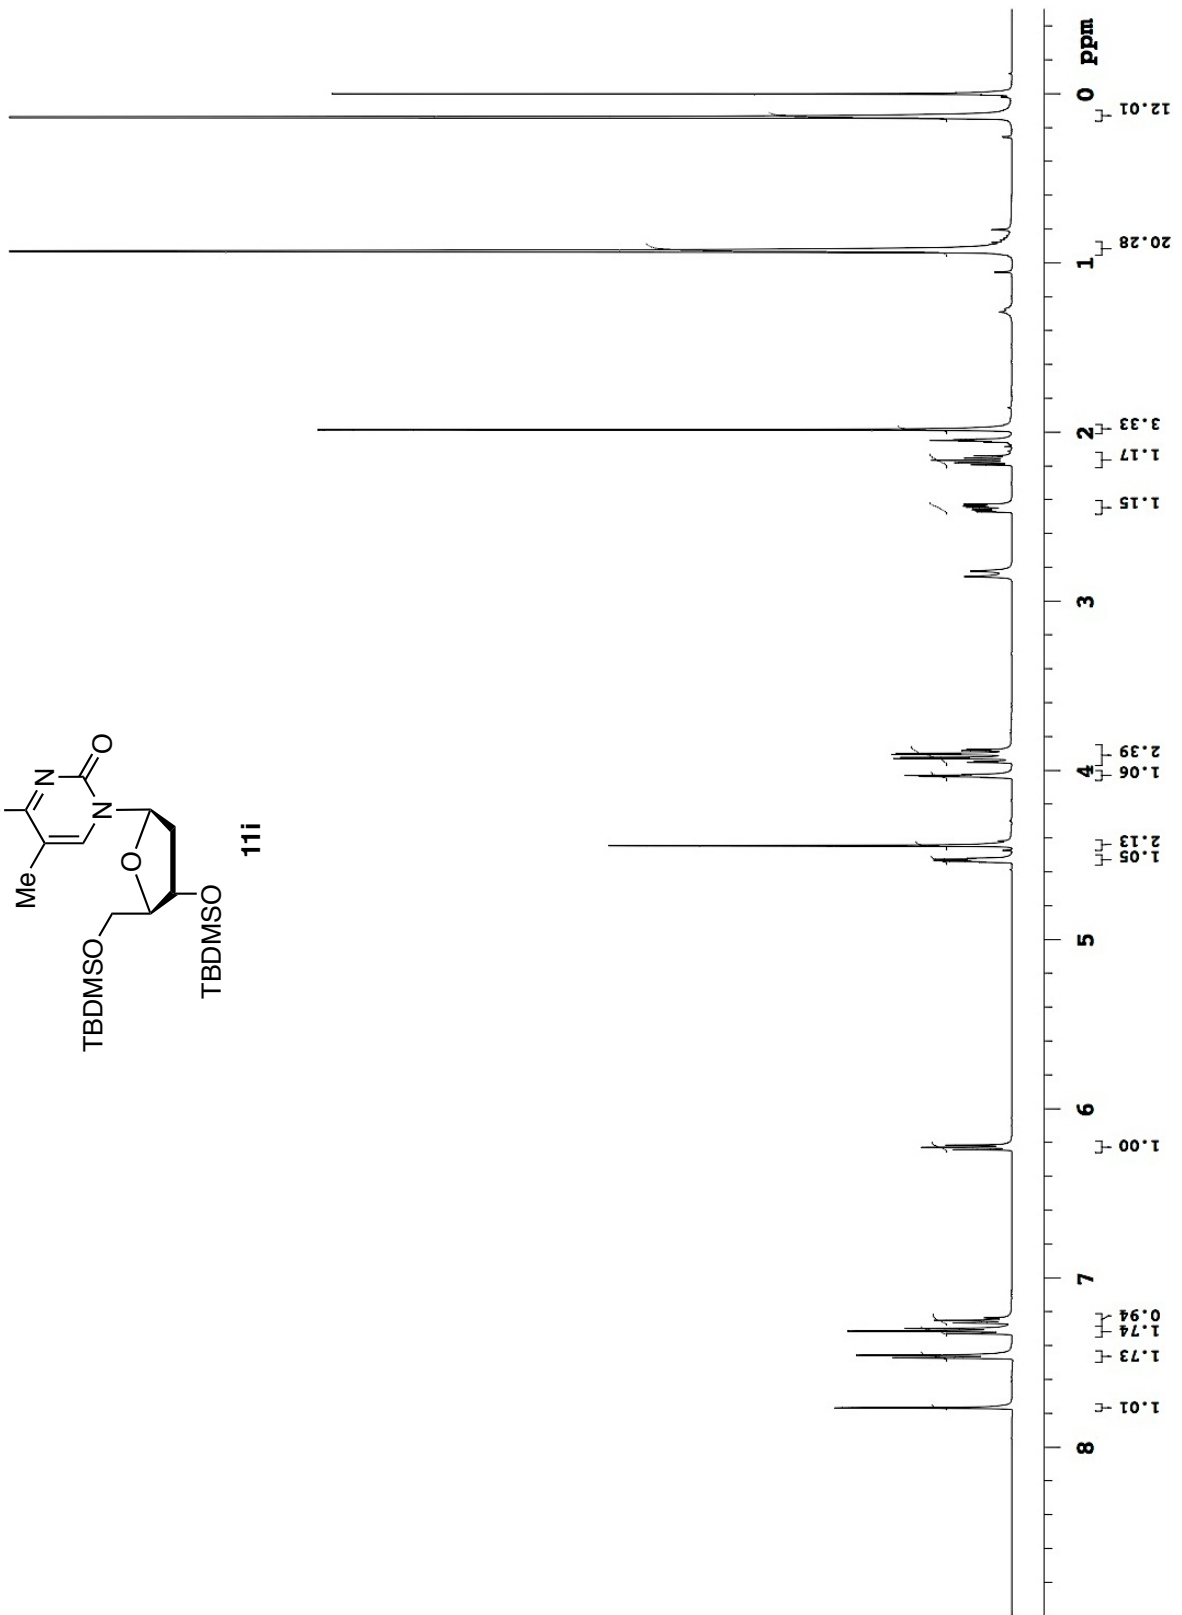

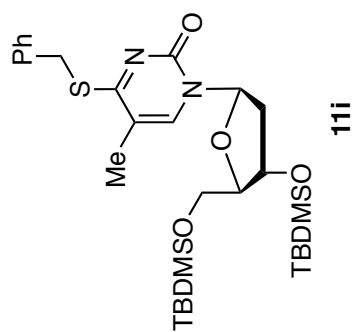

11i

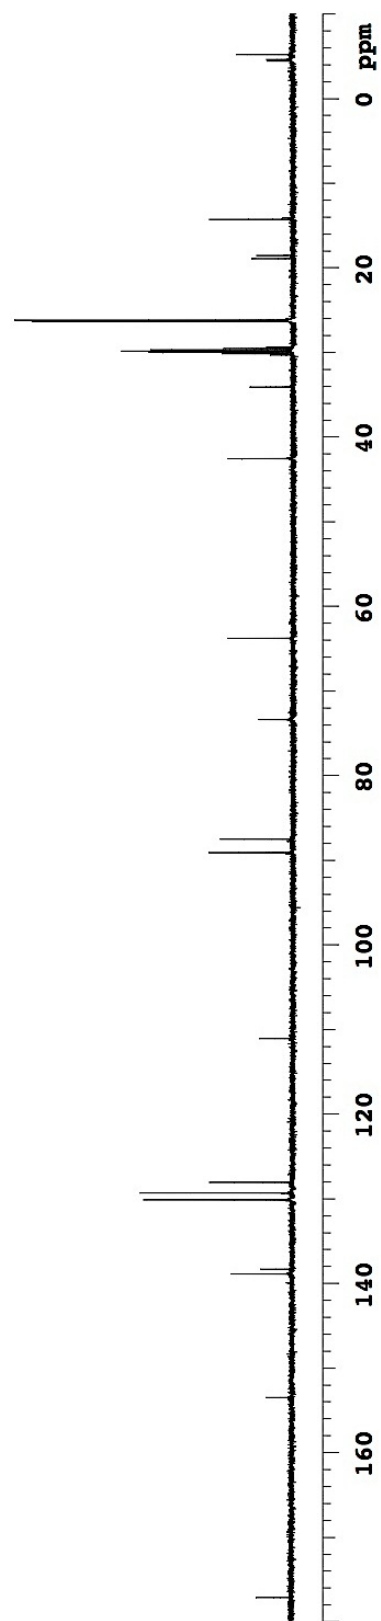

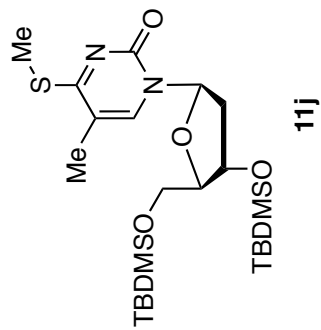

11j

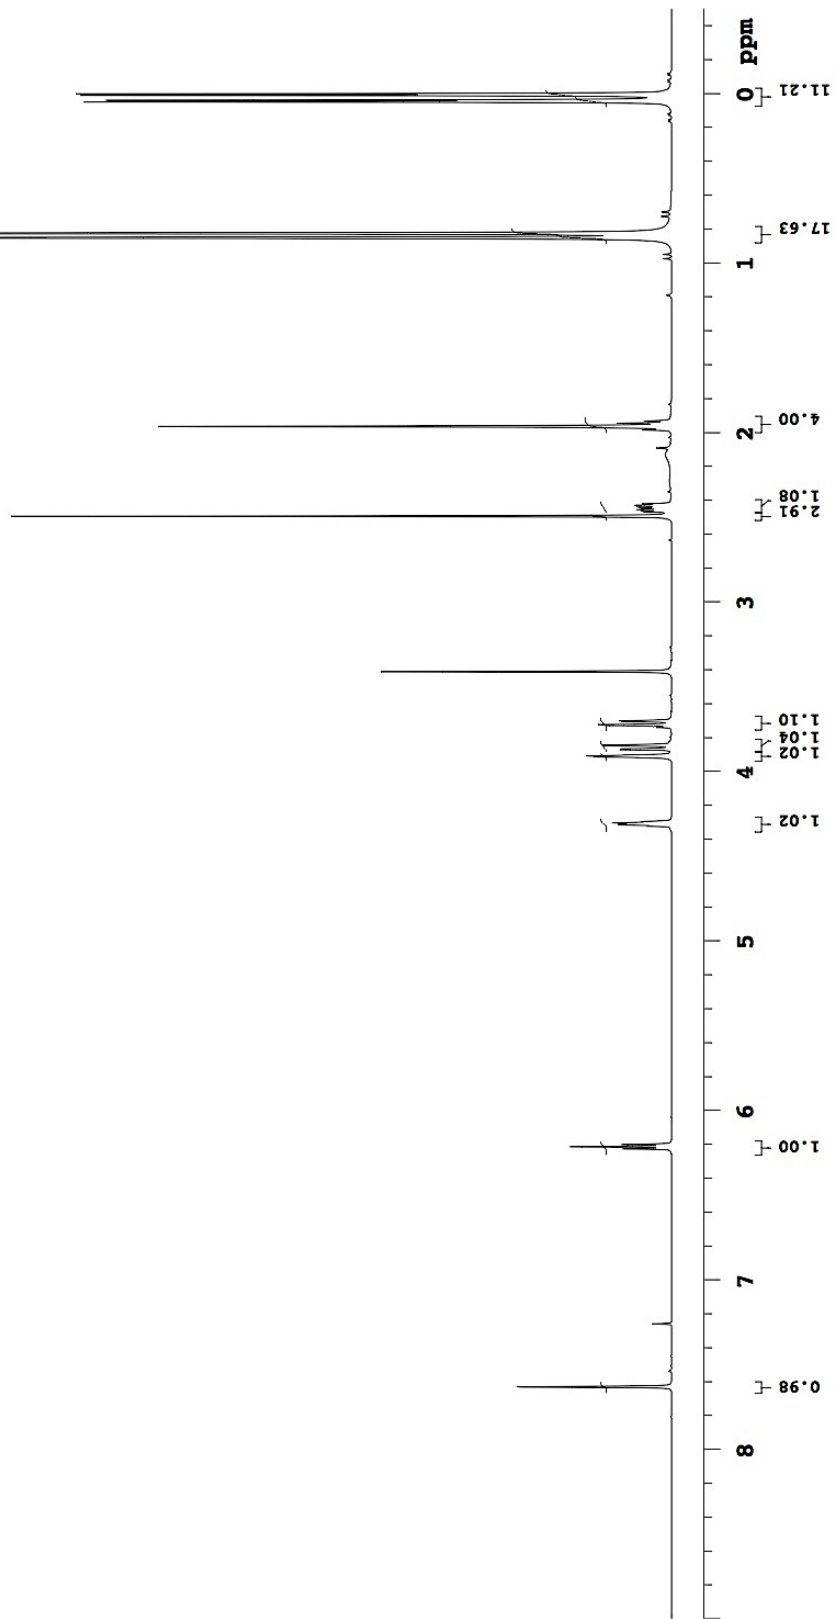

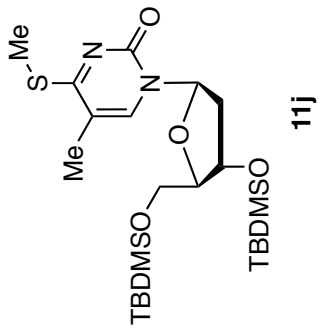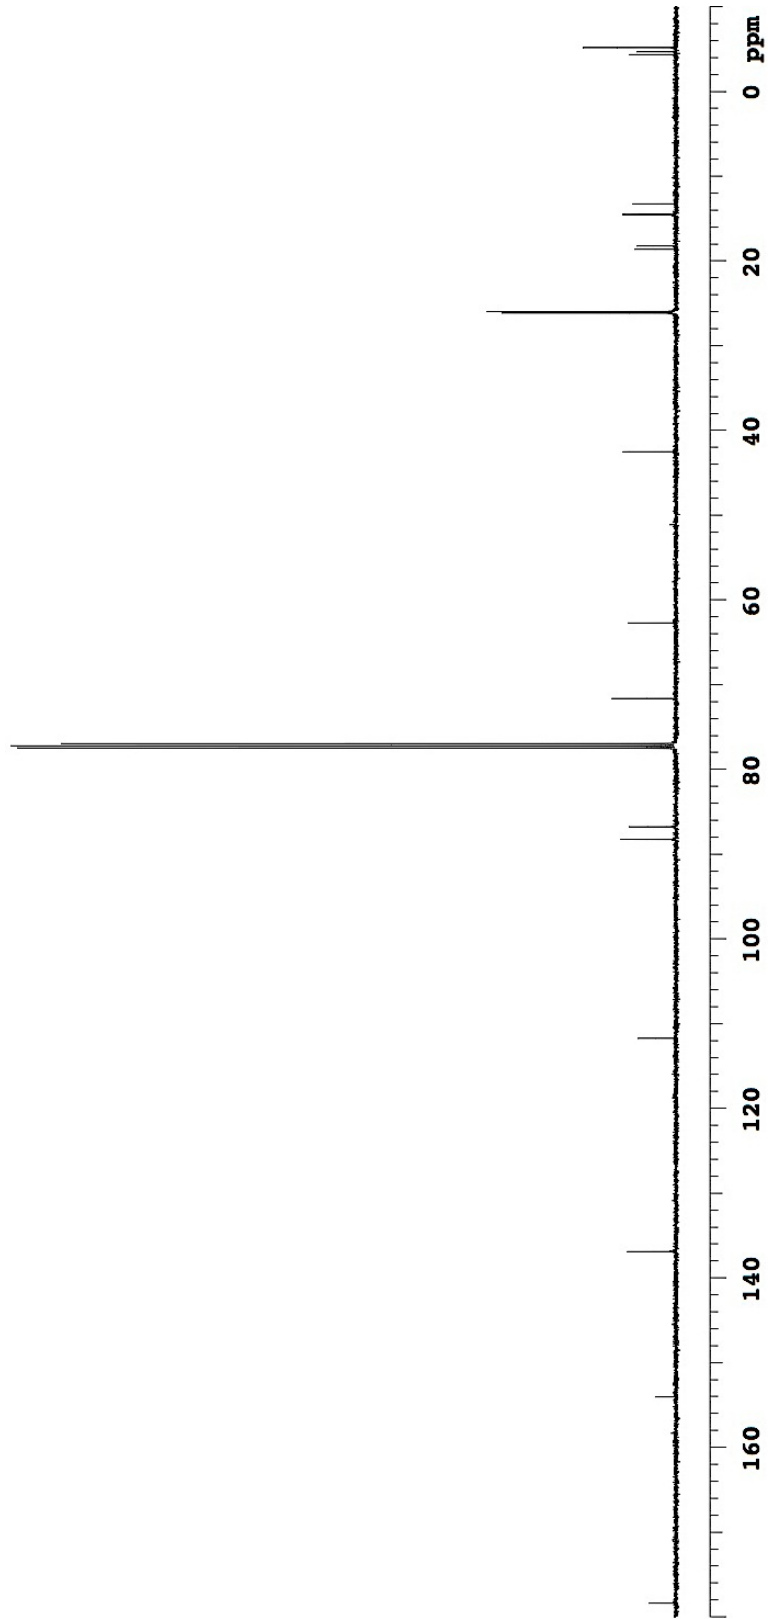

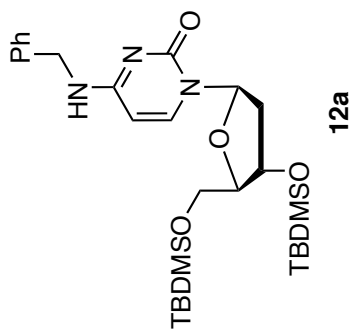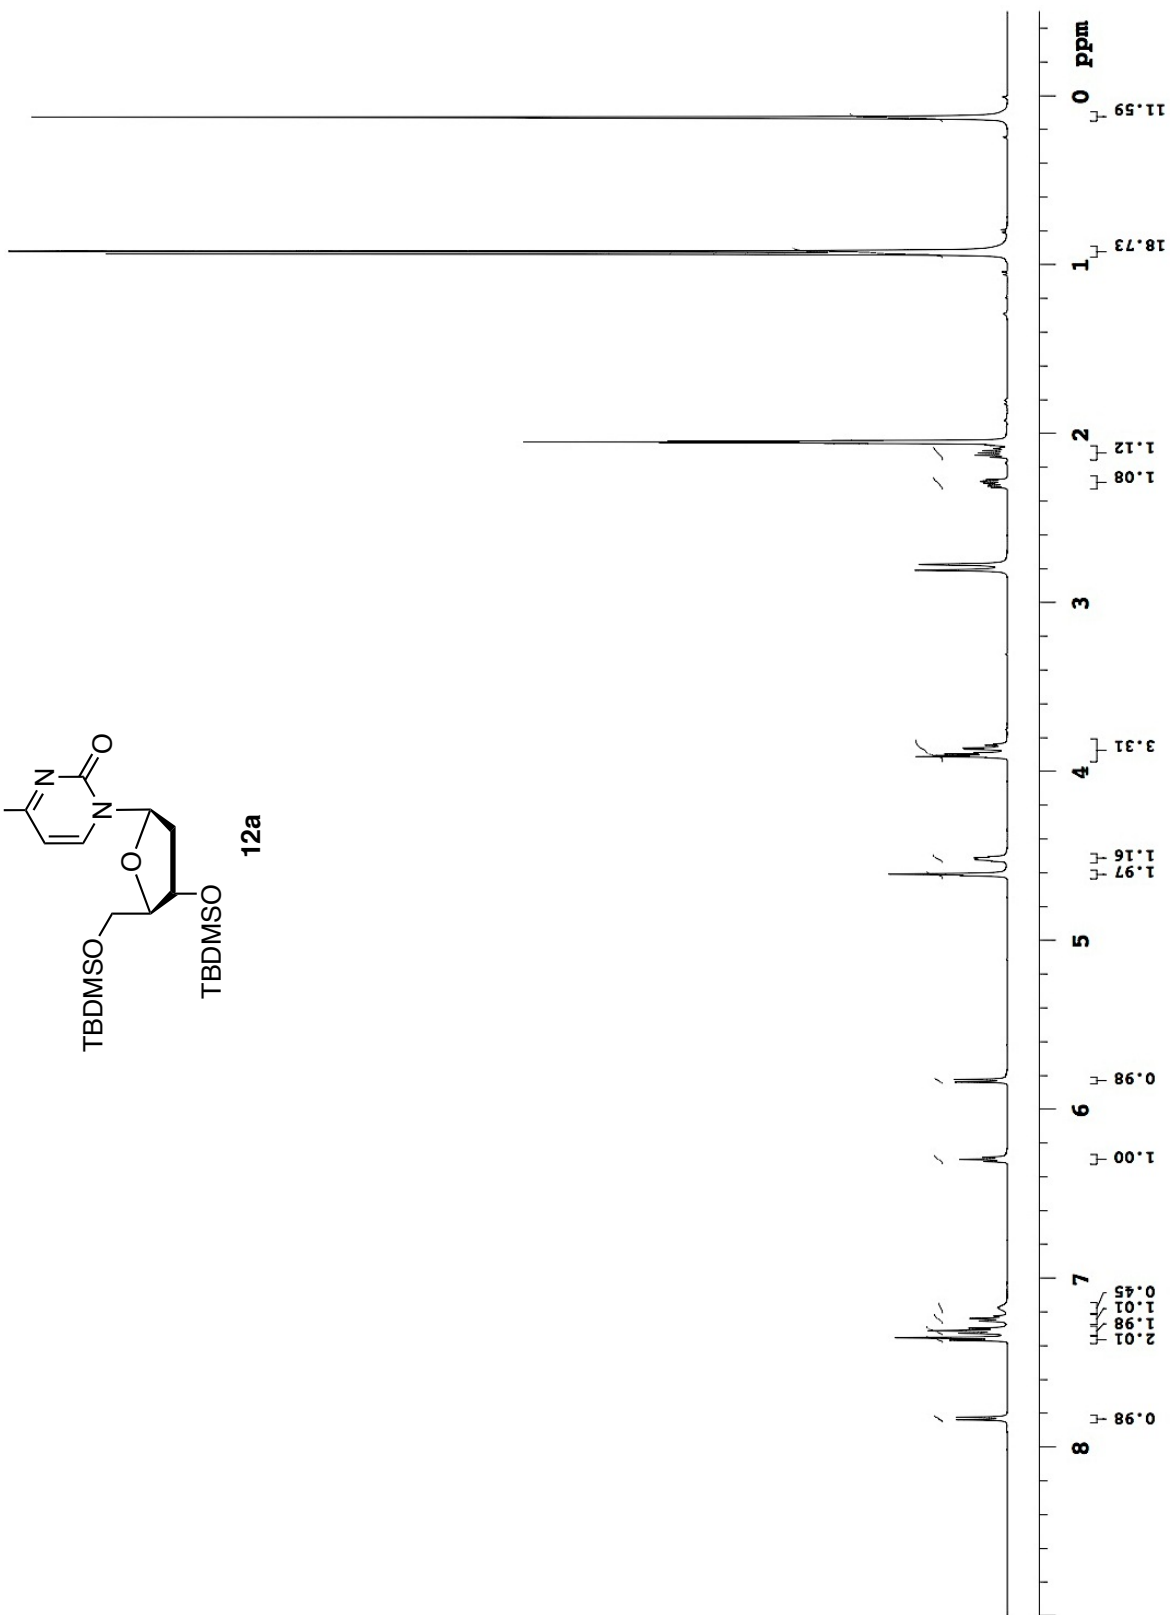



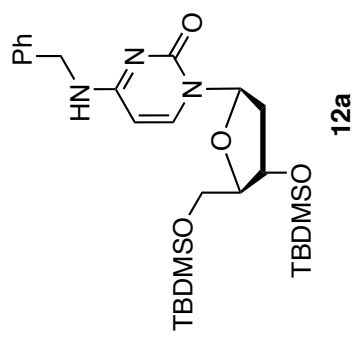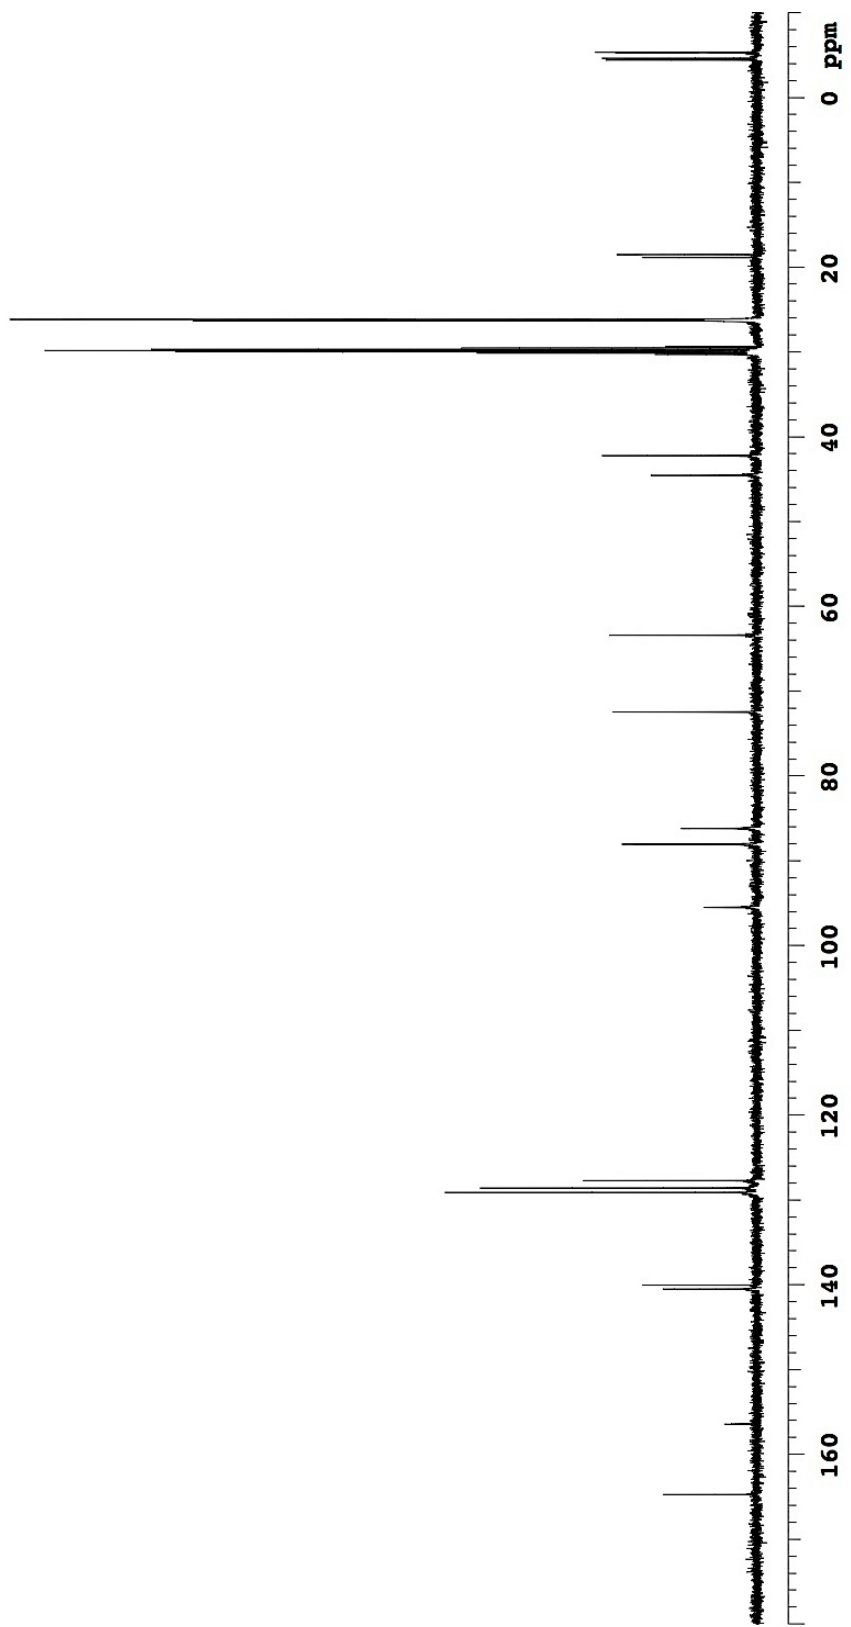

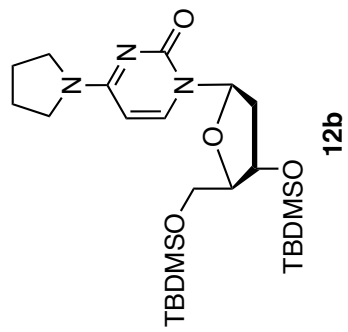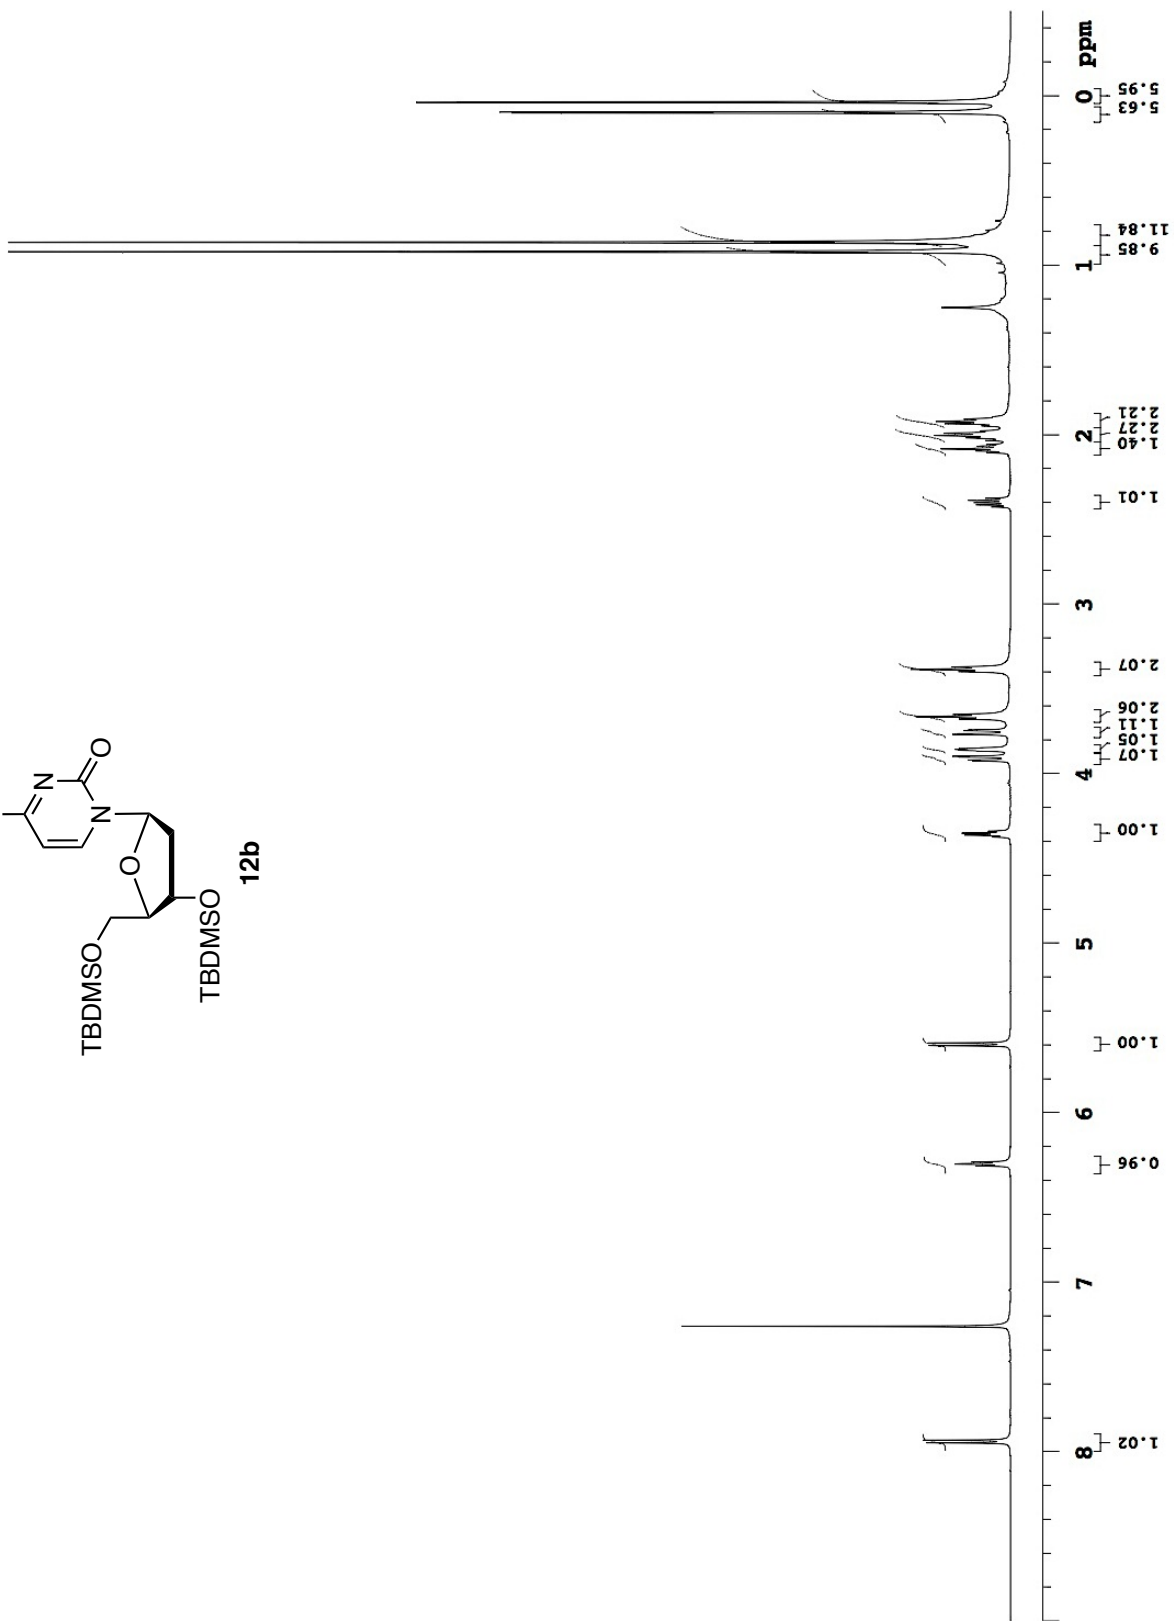

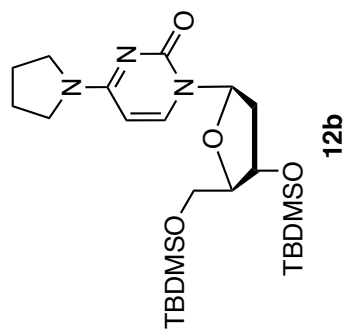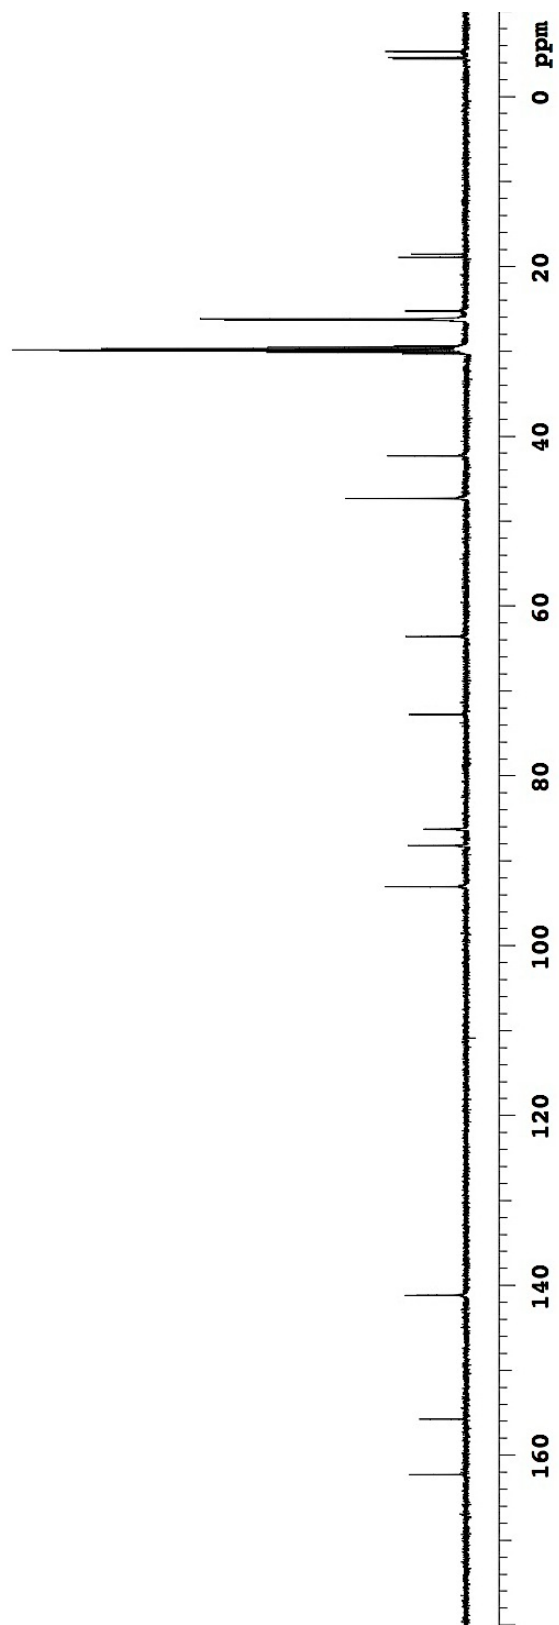

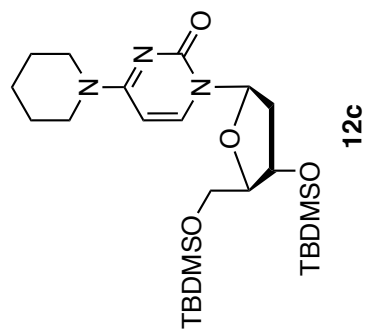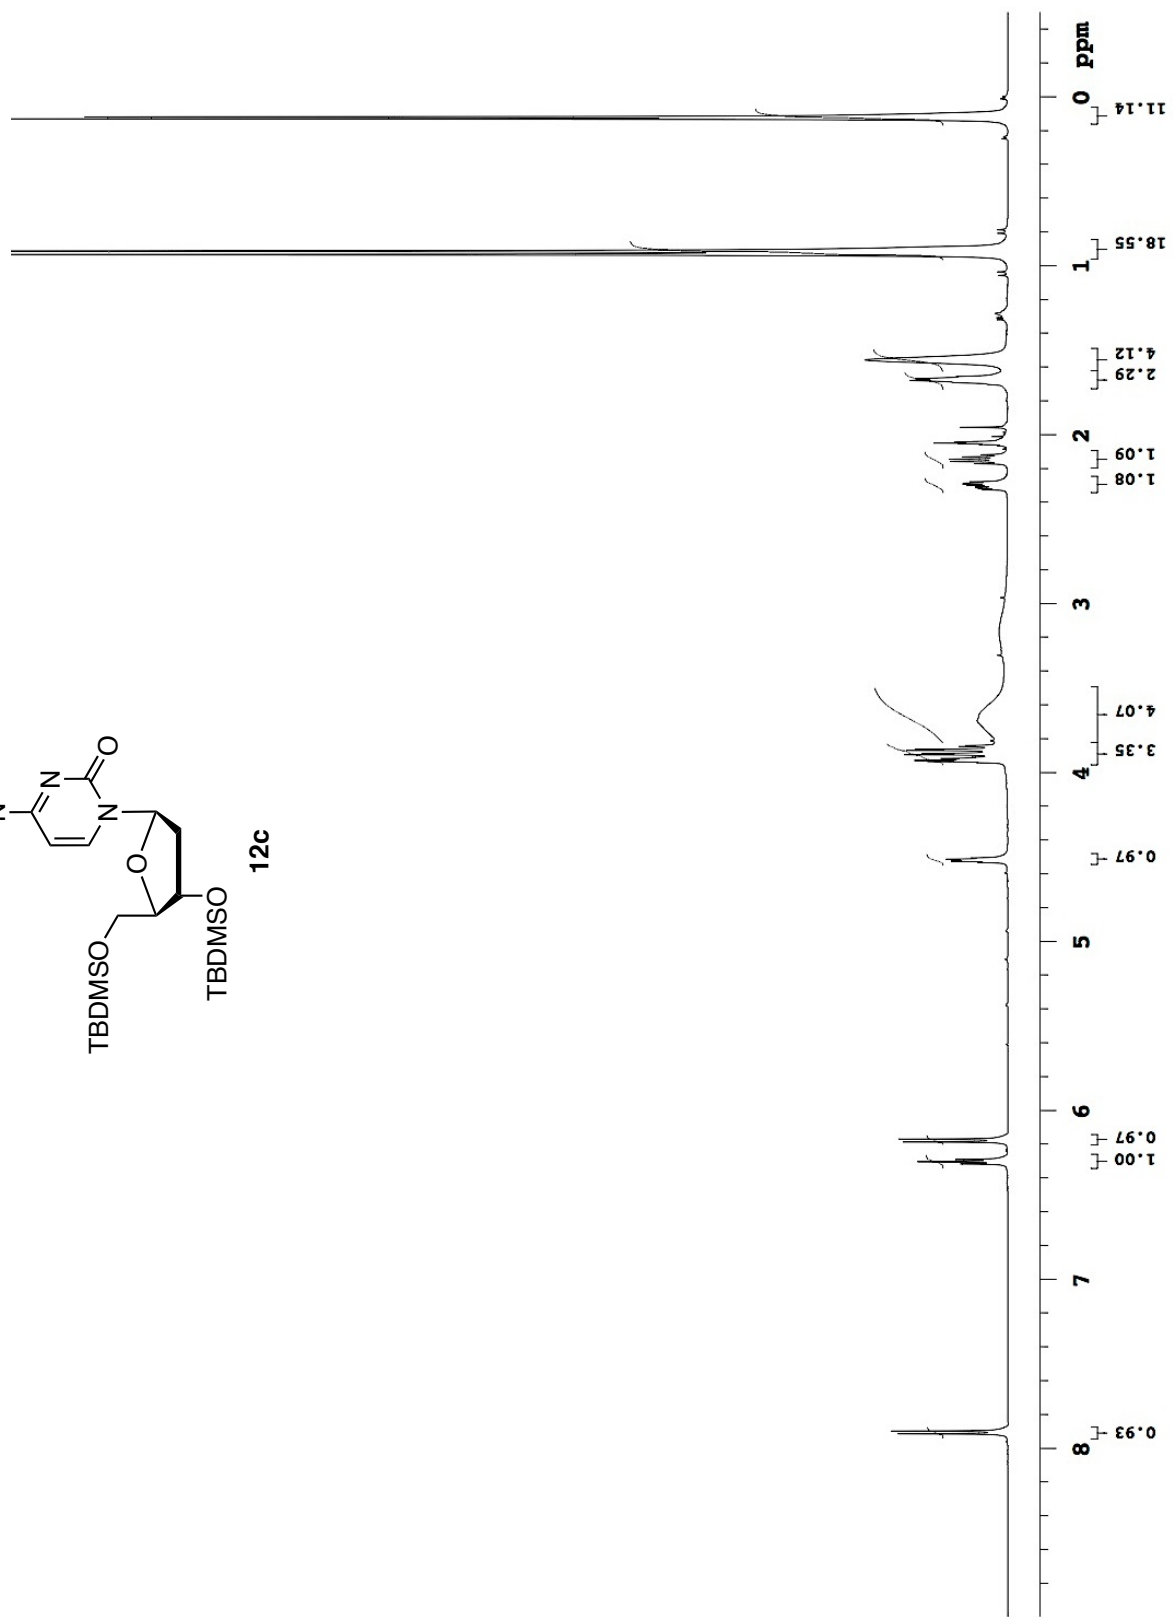

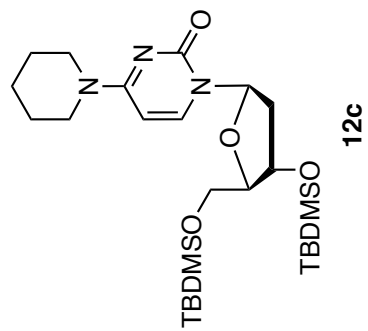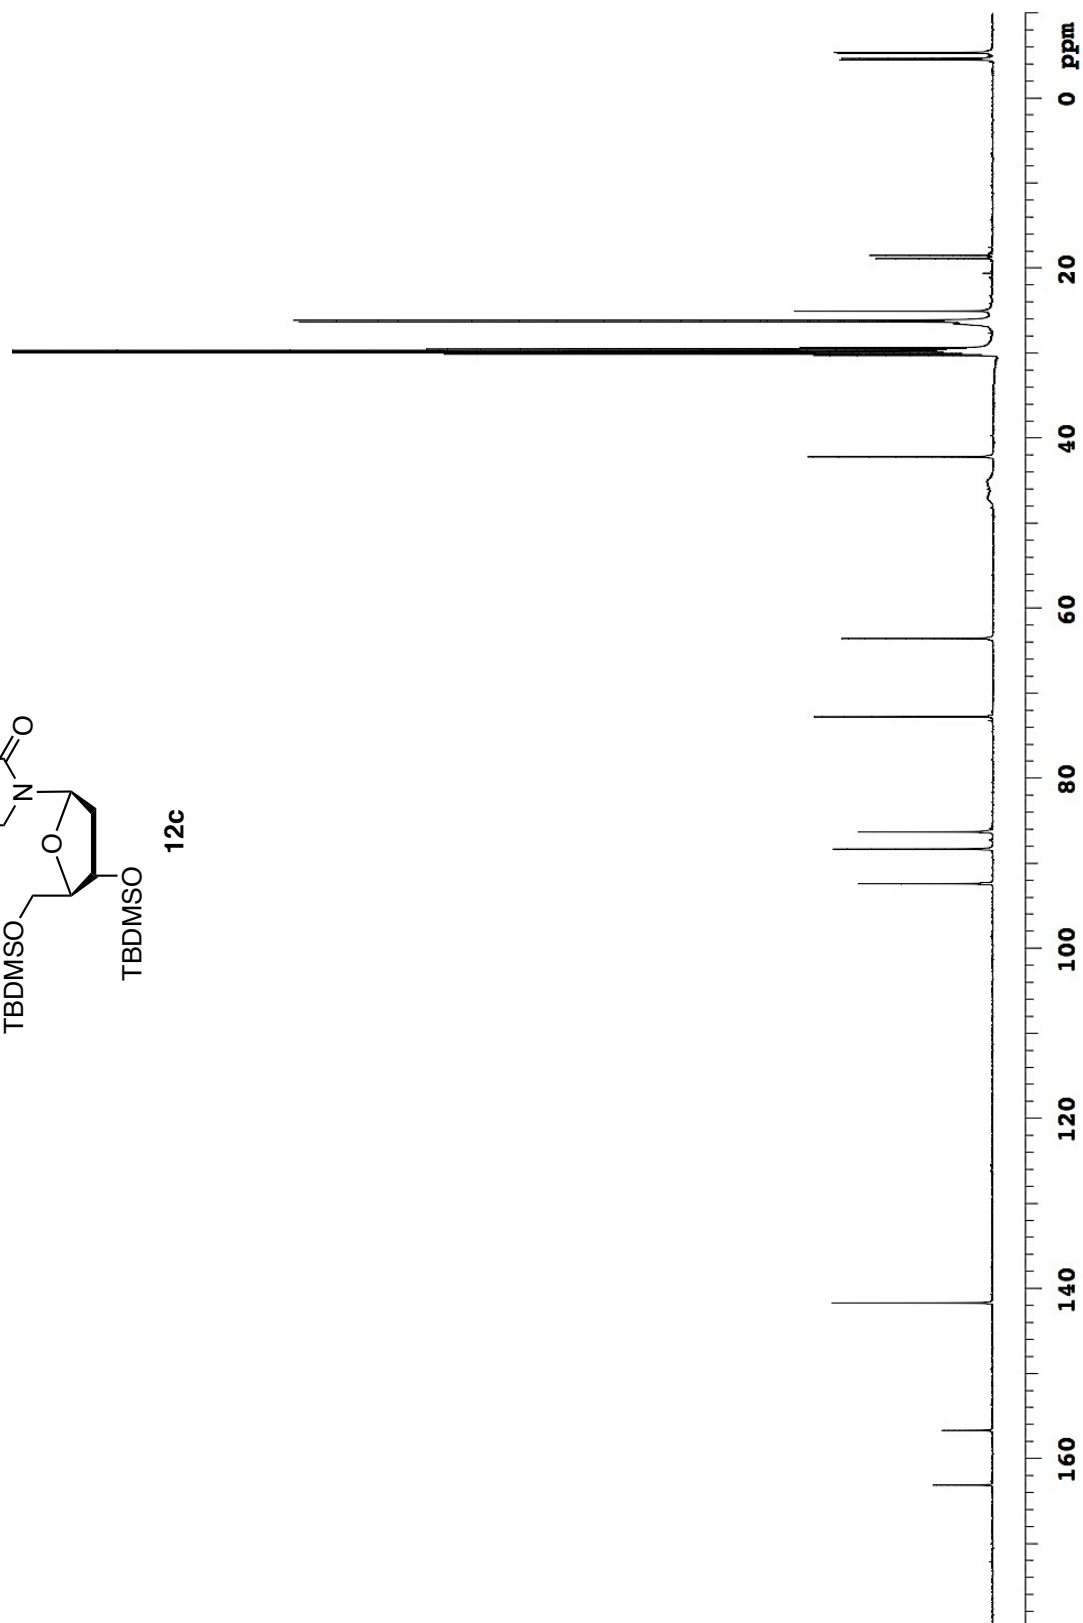

gCOSY spectrum of compound **12c** in acetone-*d*<sub>6</sub>

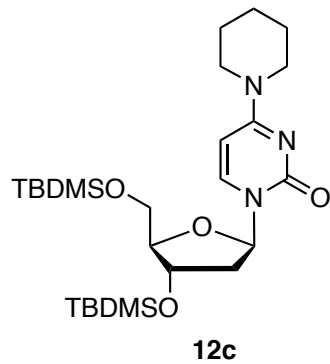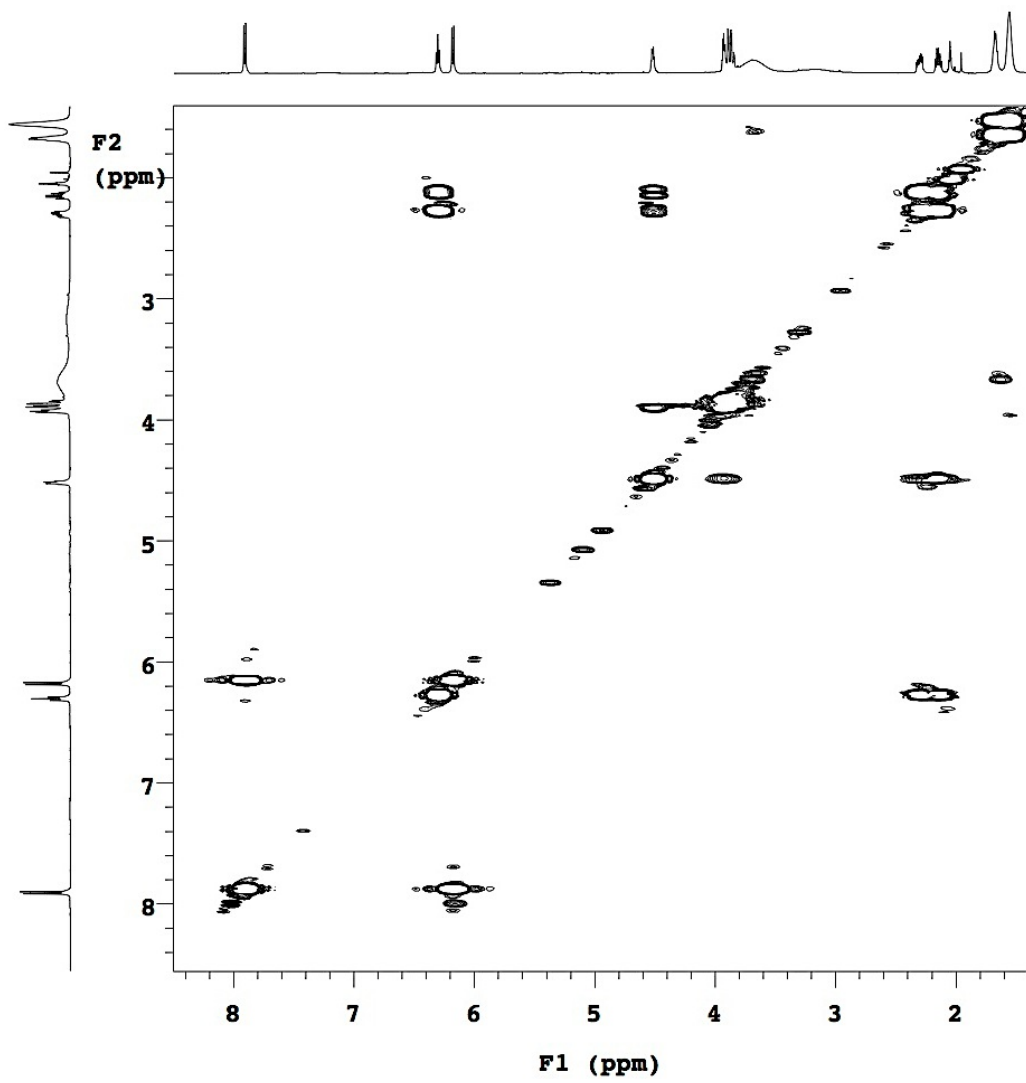

gHMQC spectrum of compound **12c** in acetone- $d_6$

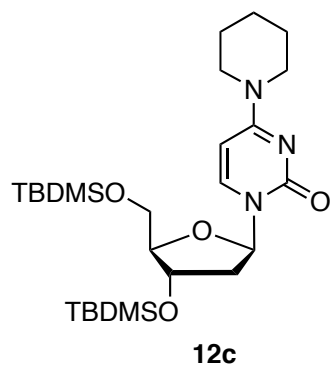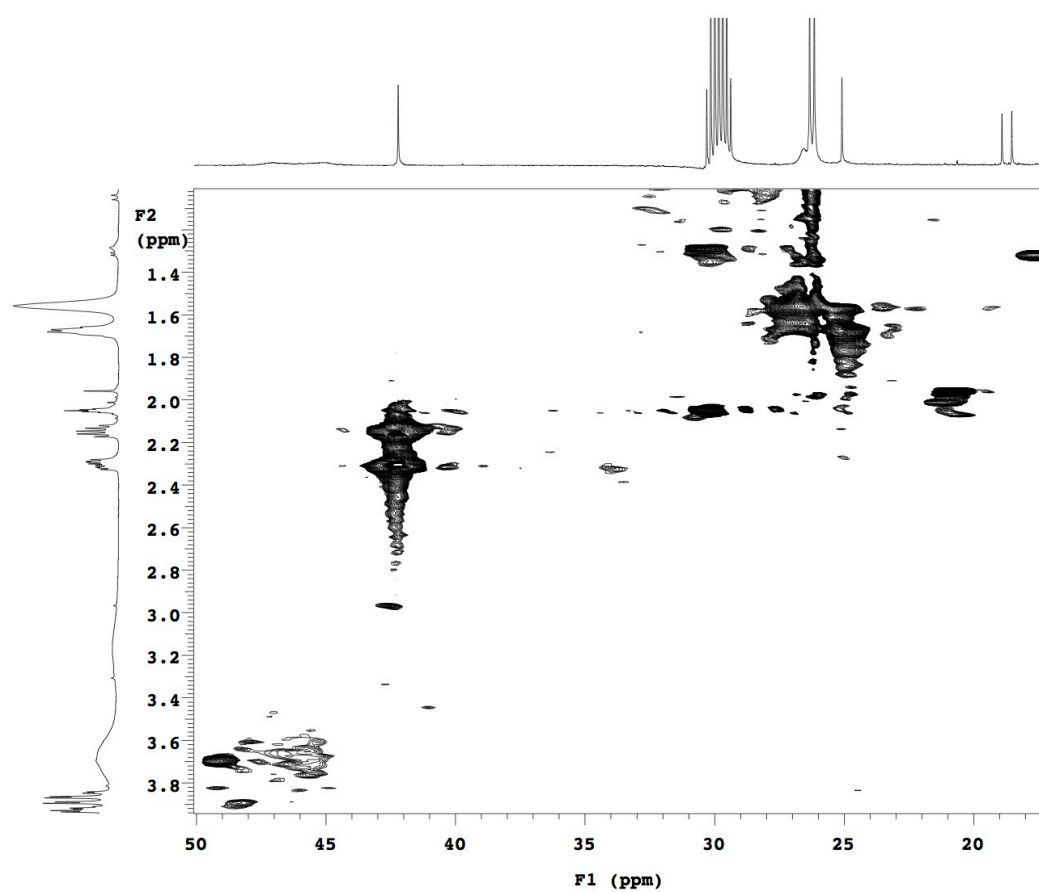

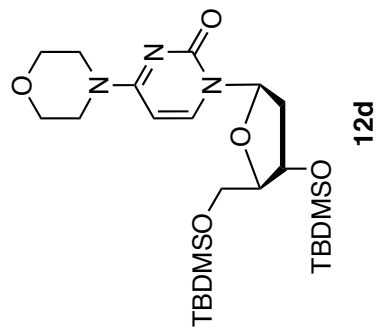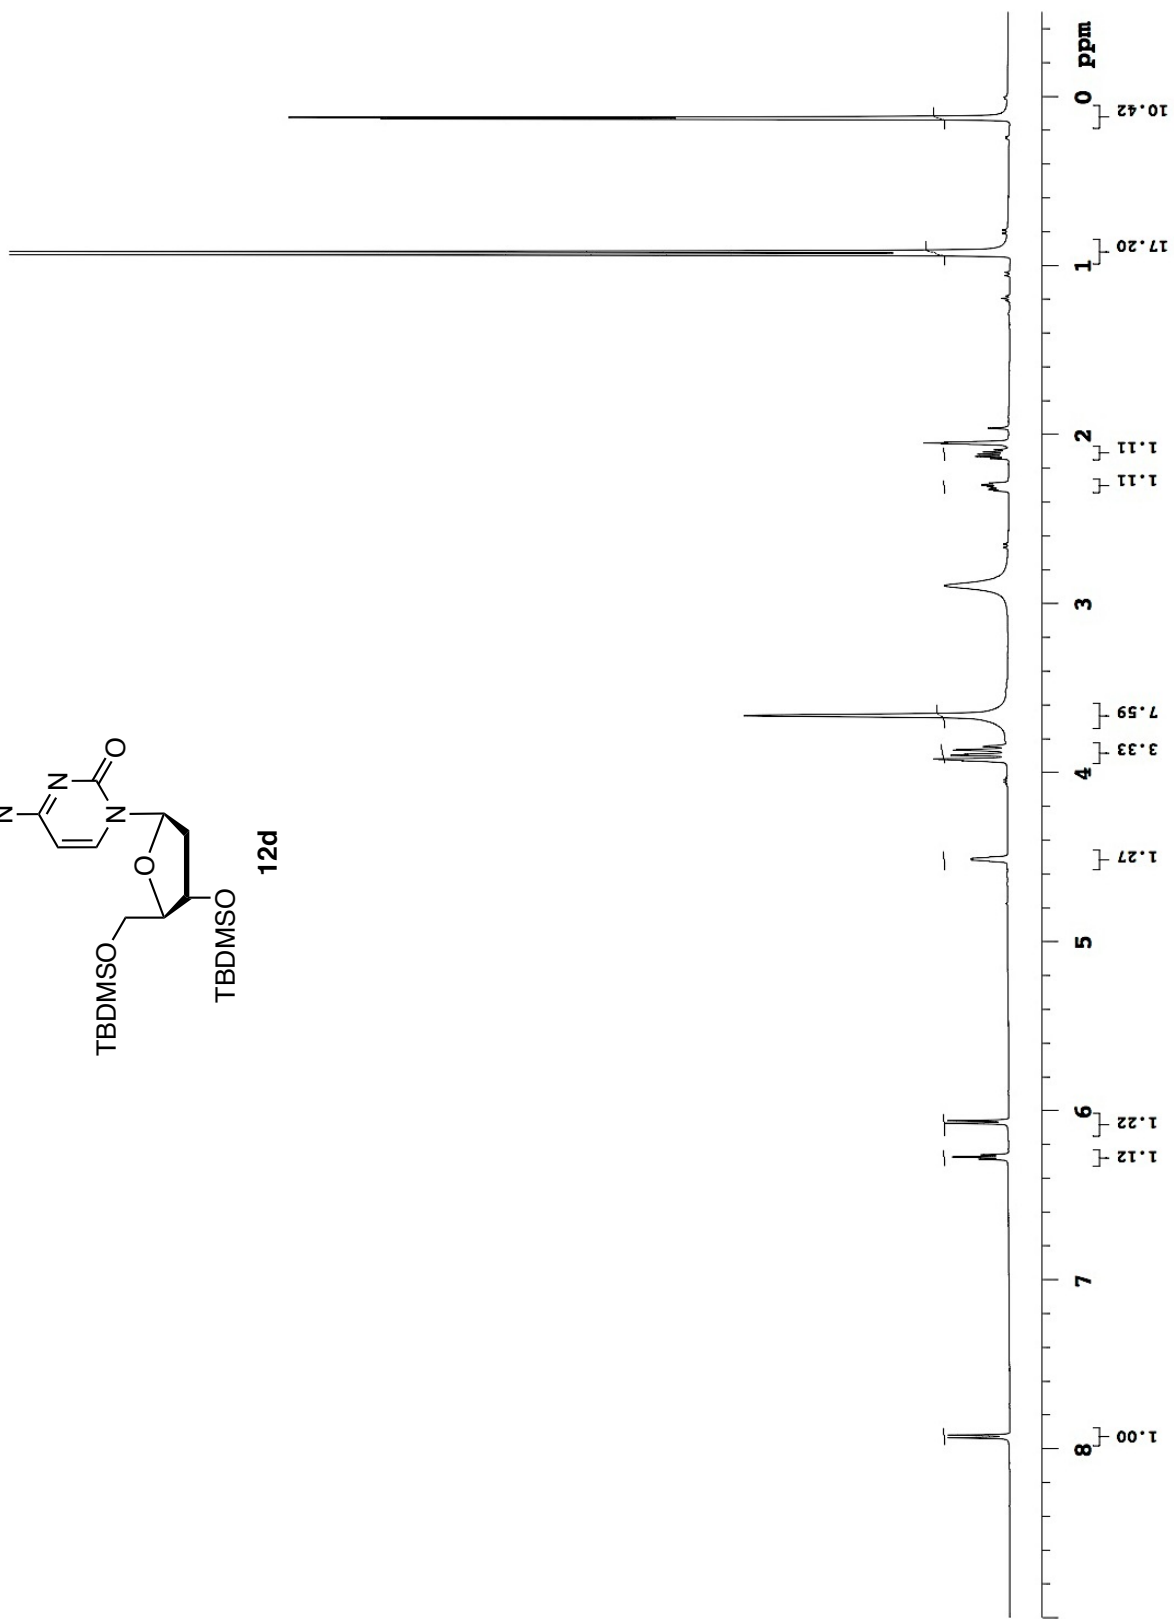



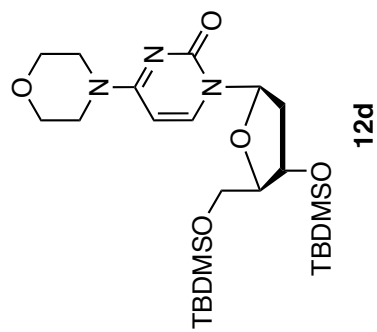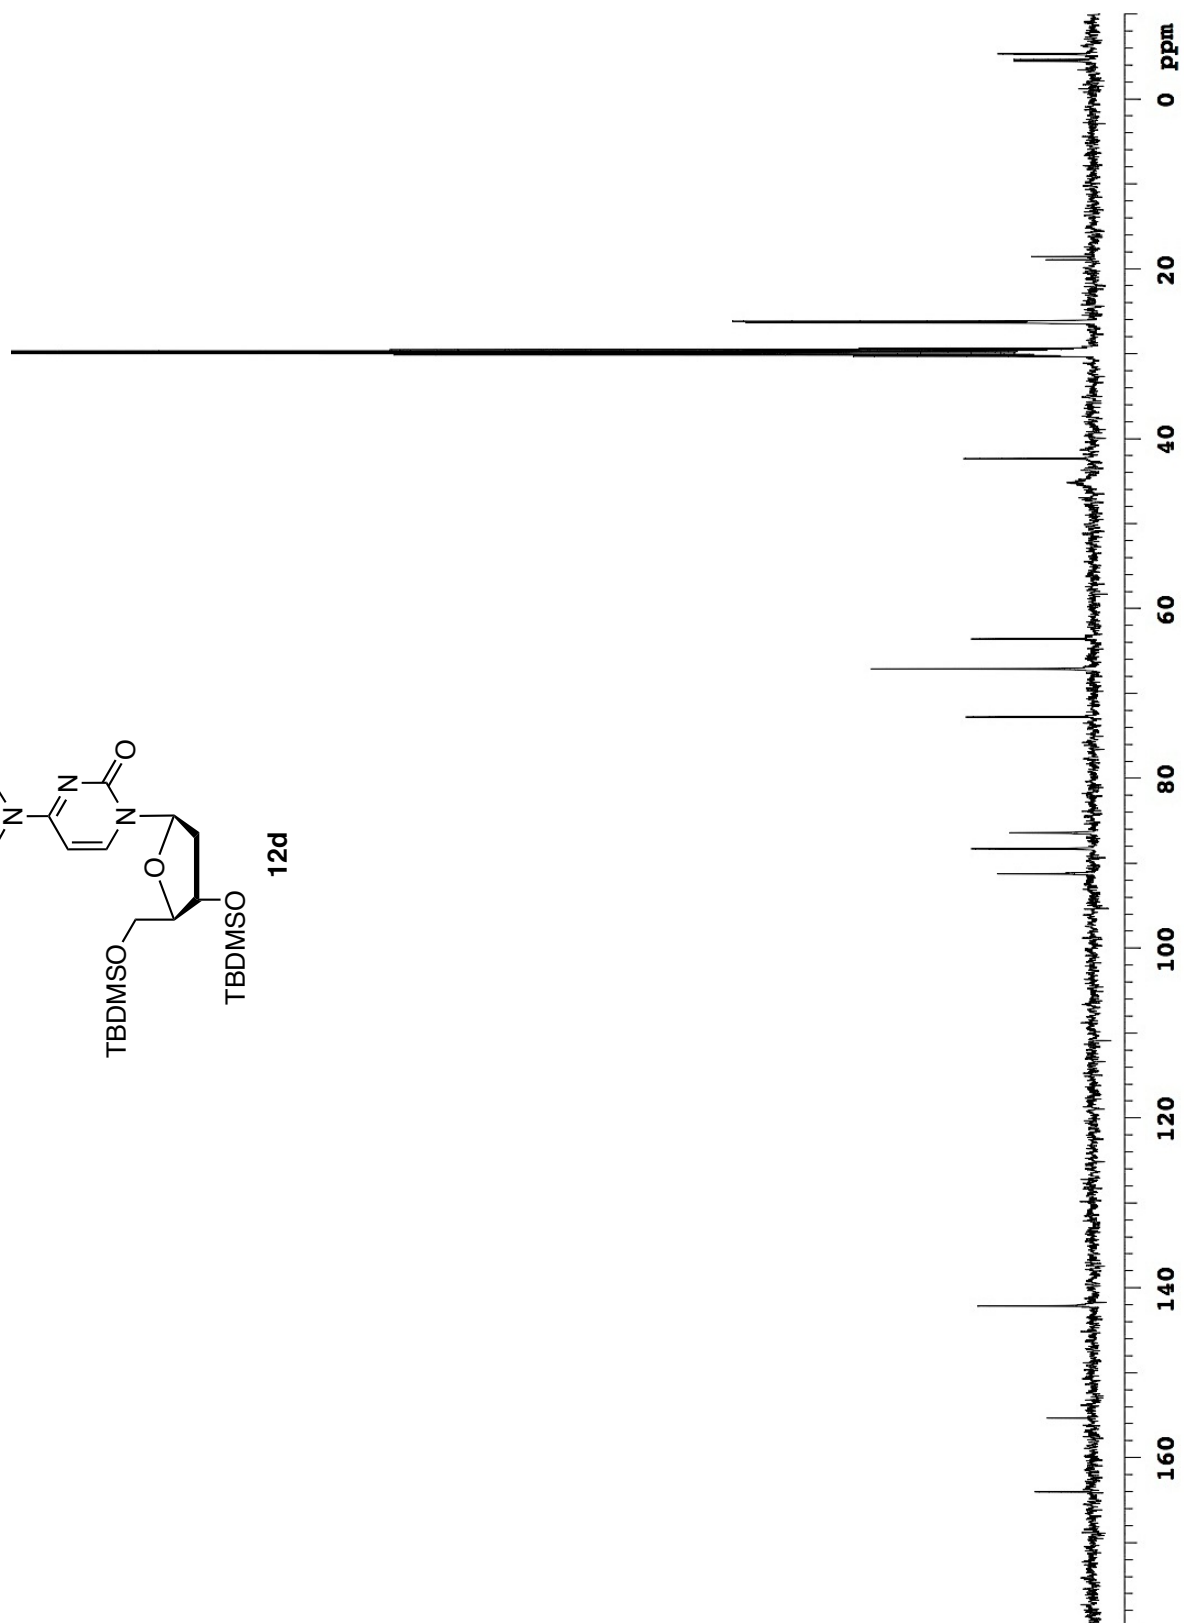

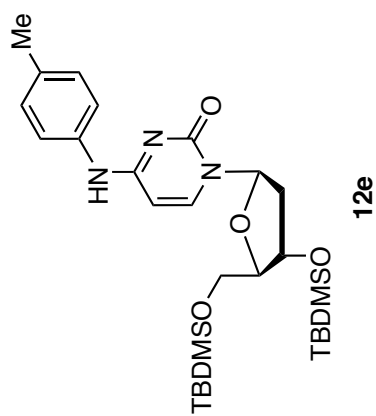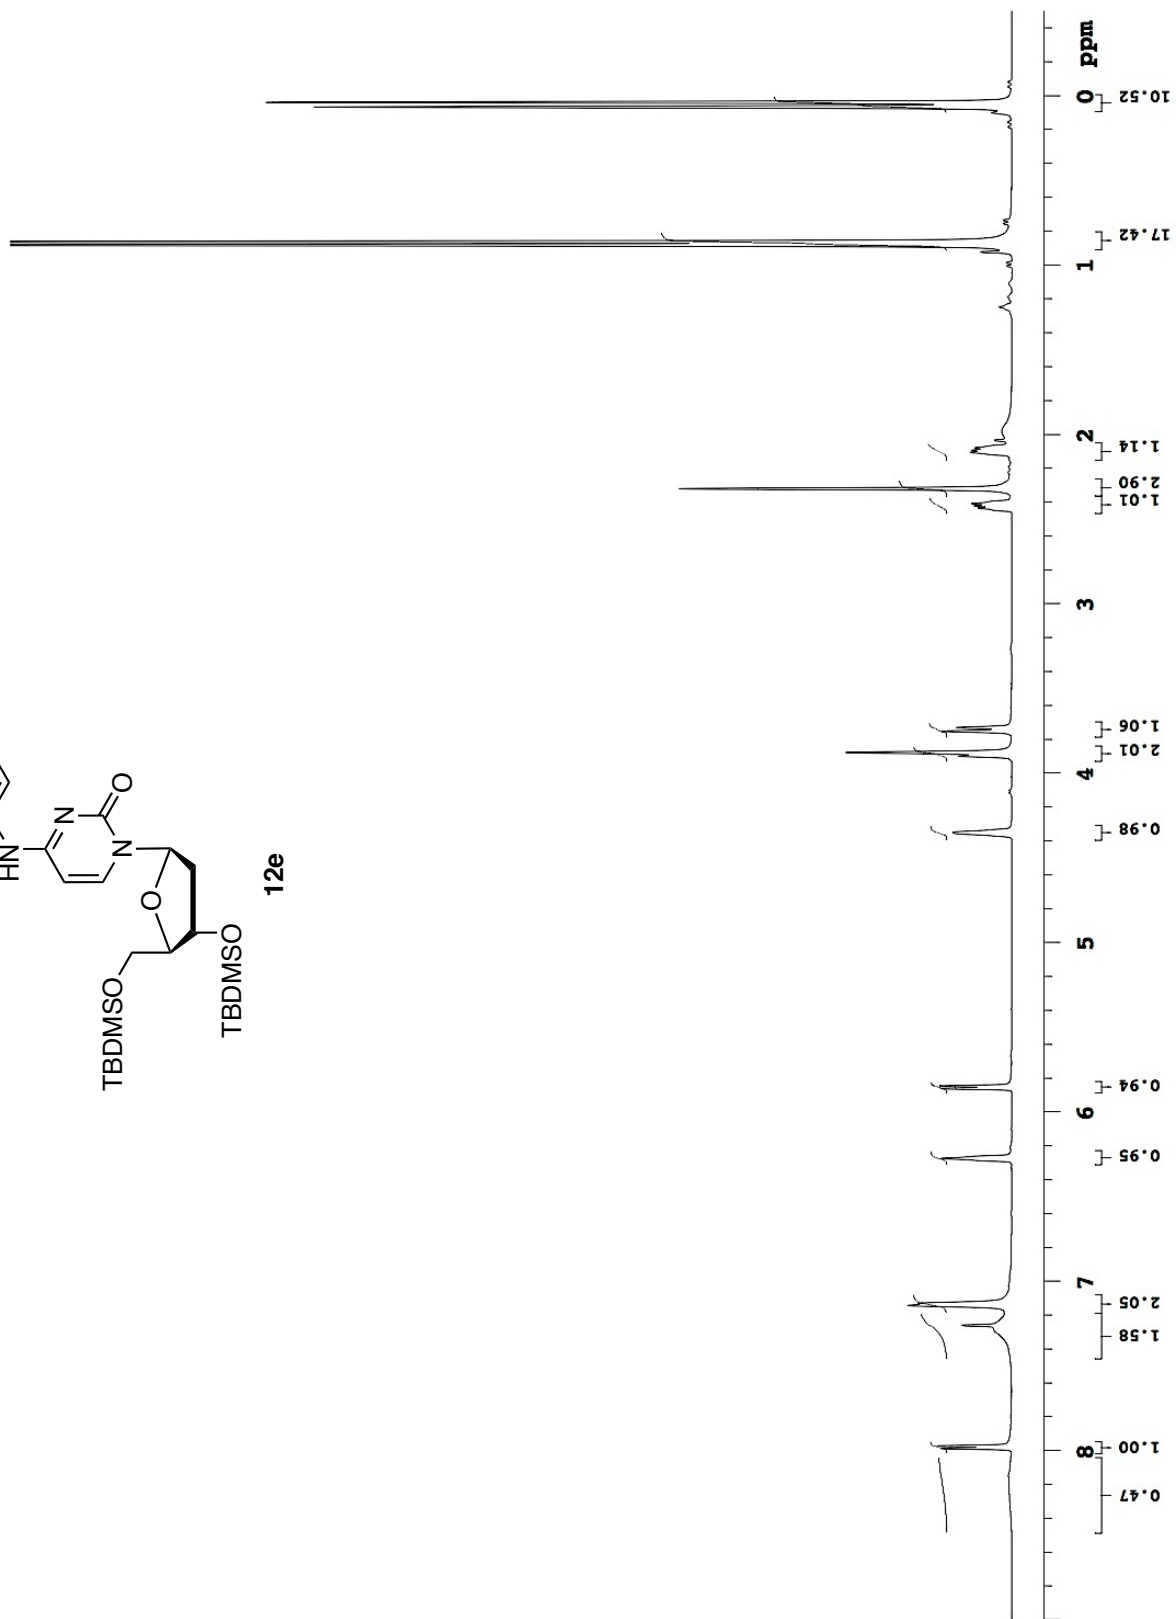

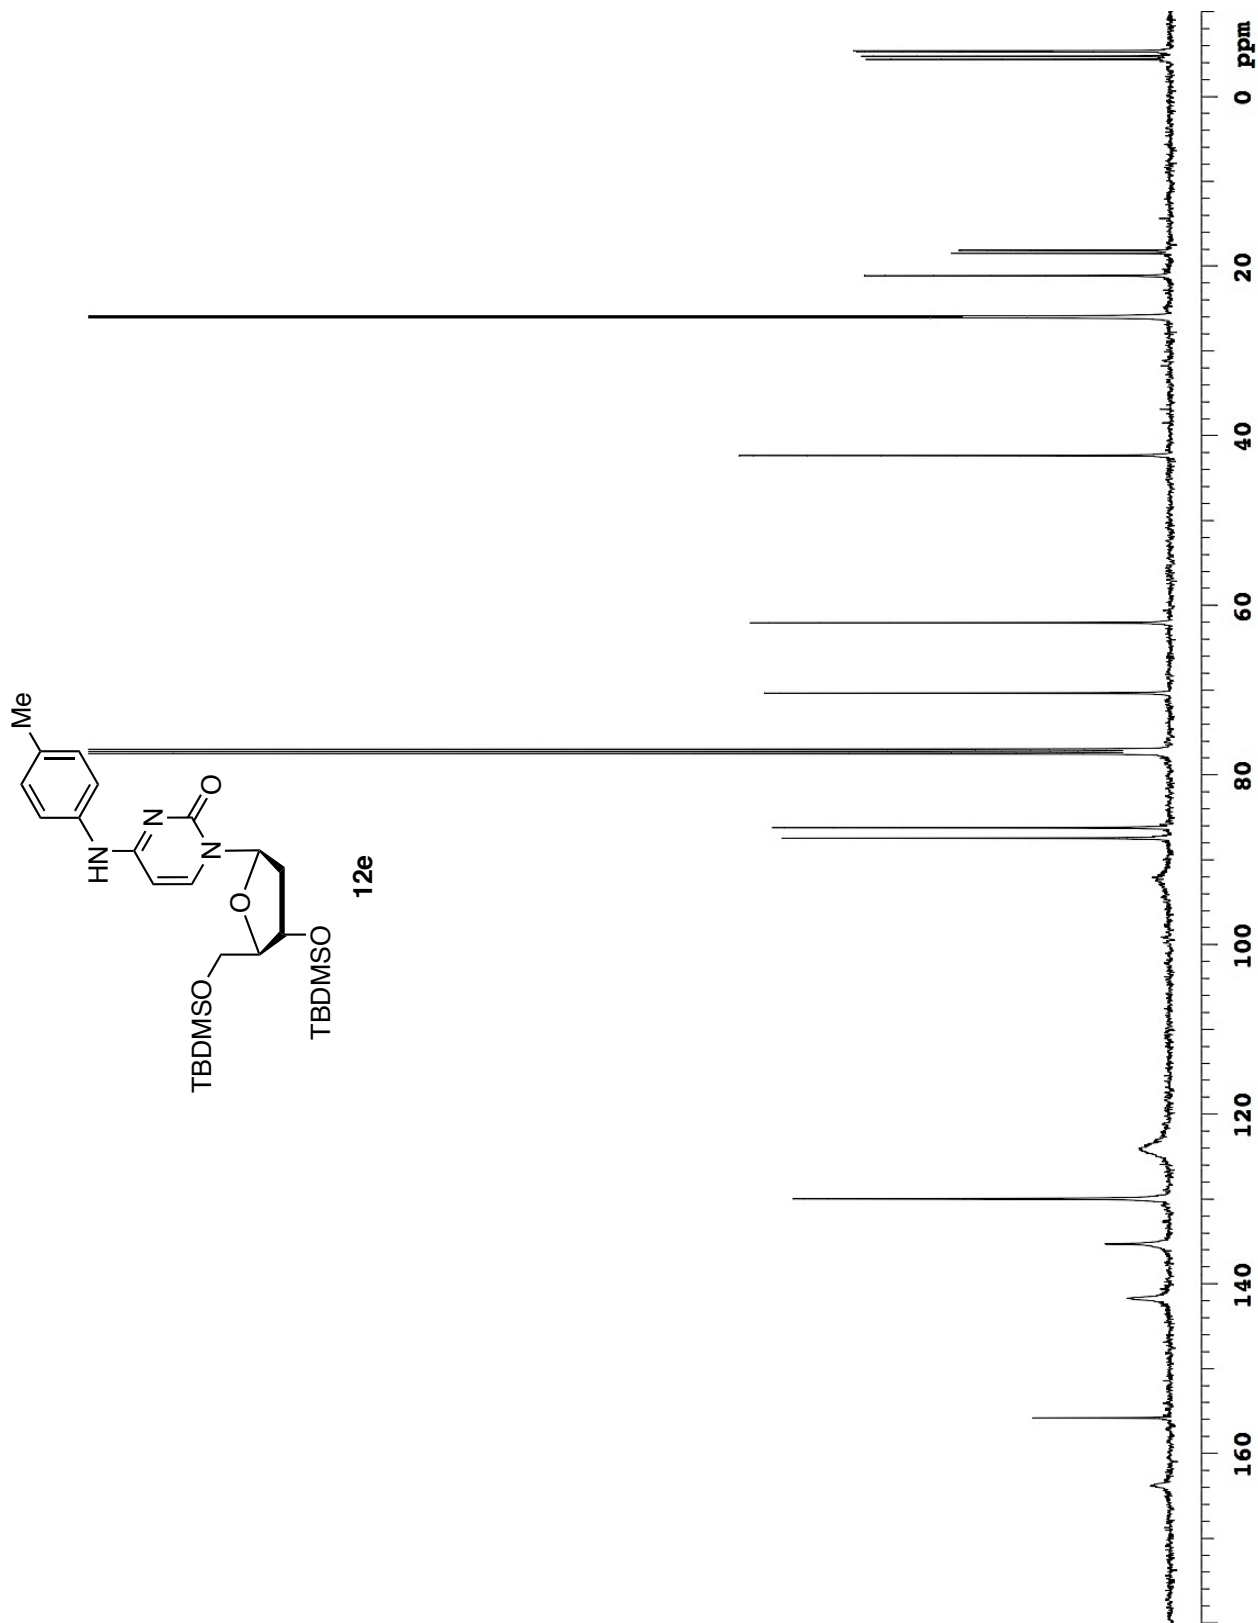

gCOSY spectrum of compound **12e** in CDCl<sub>3</sub>

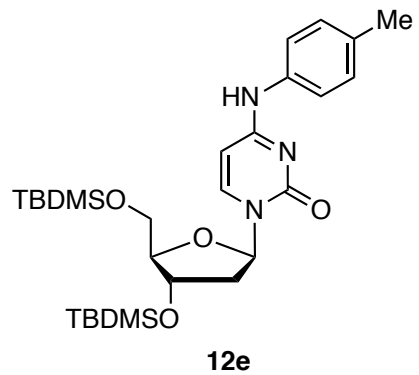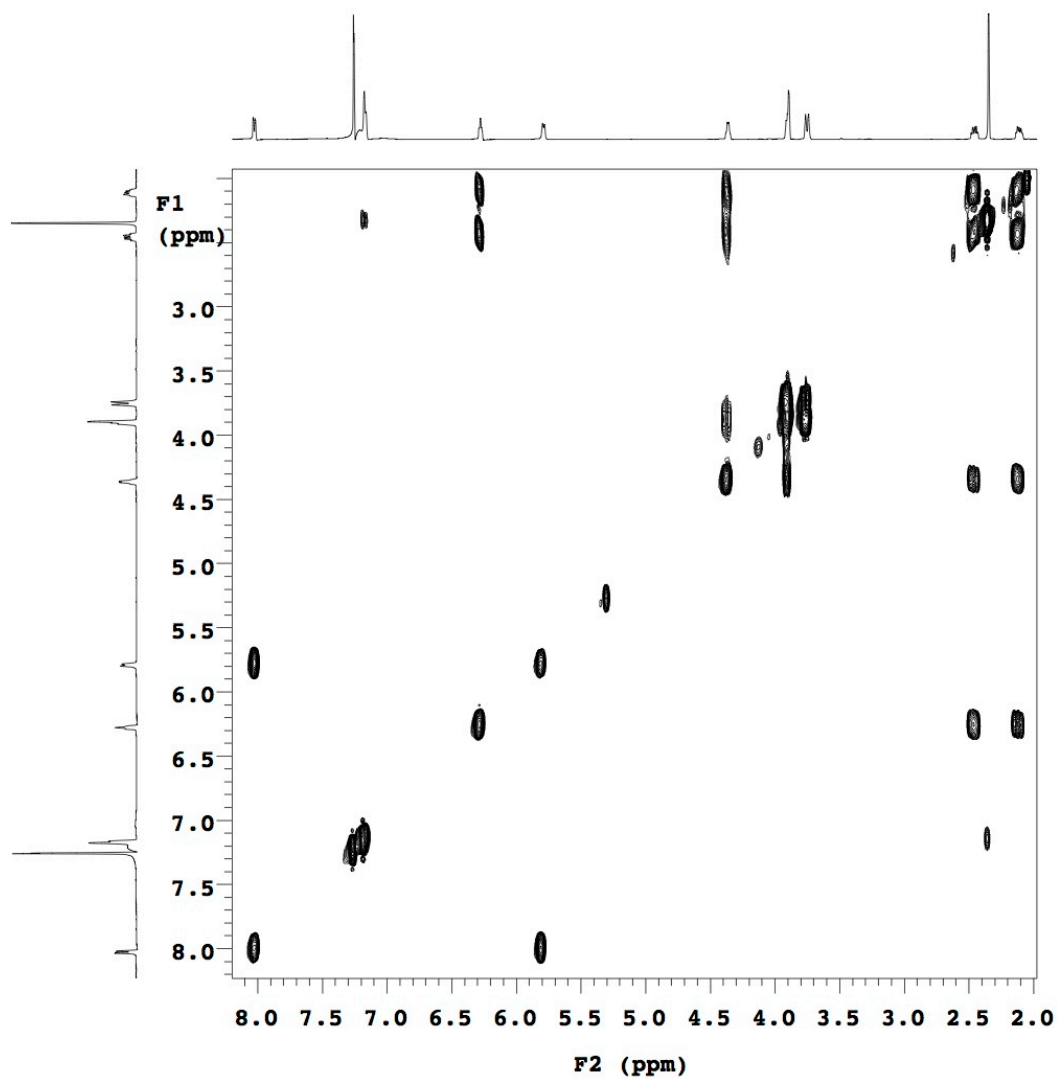

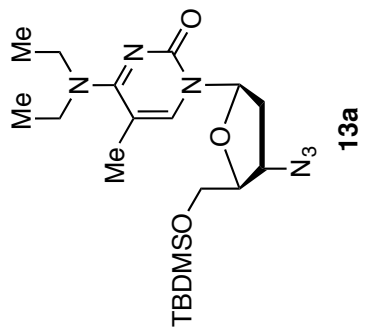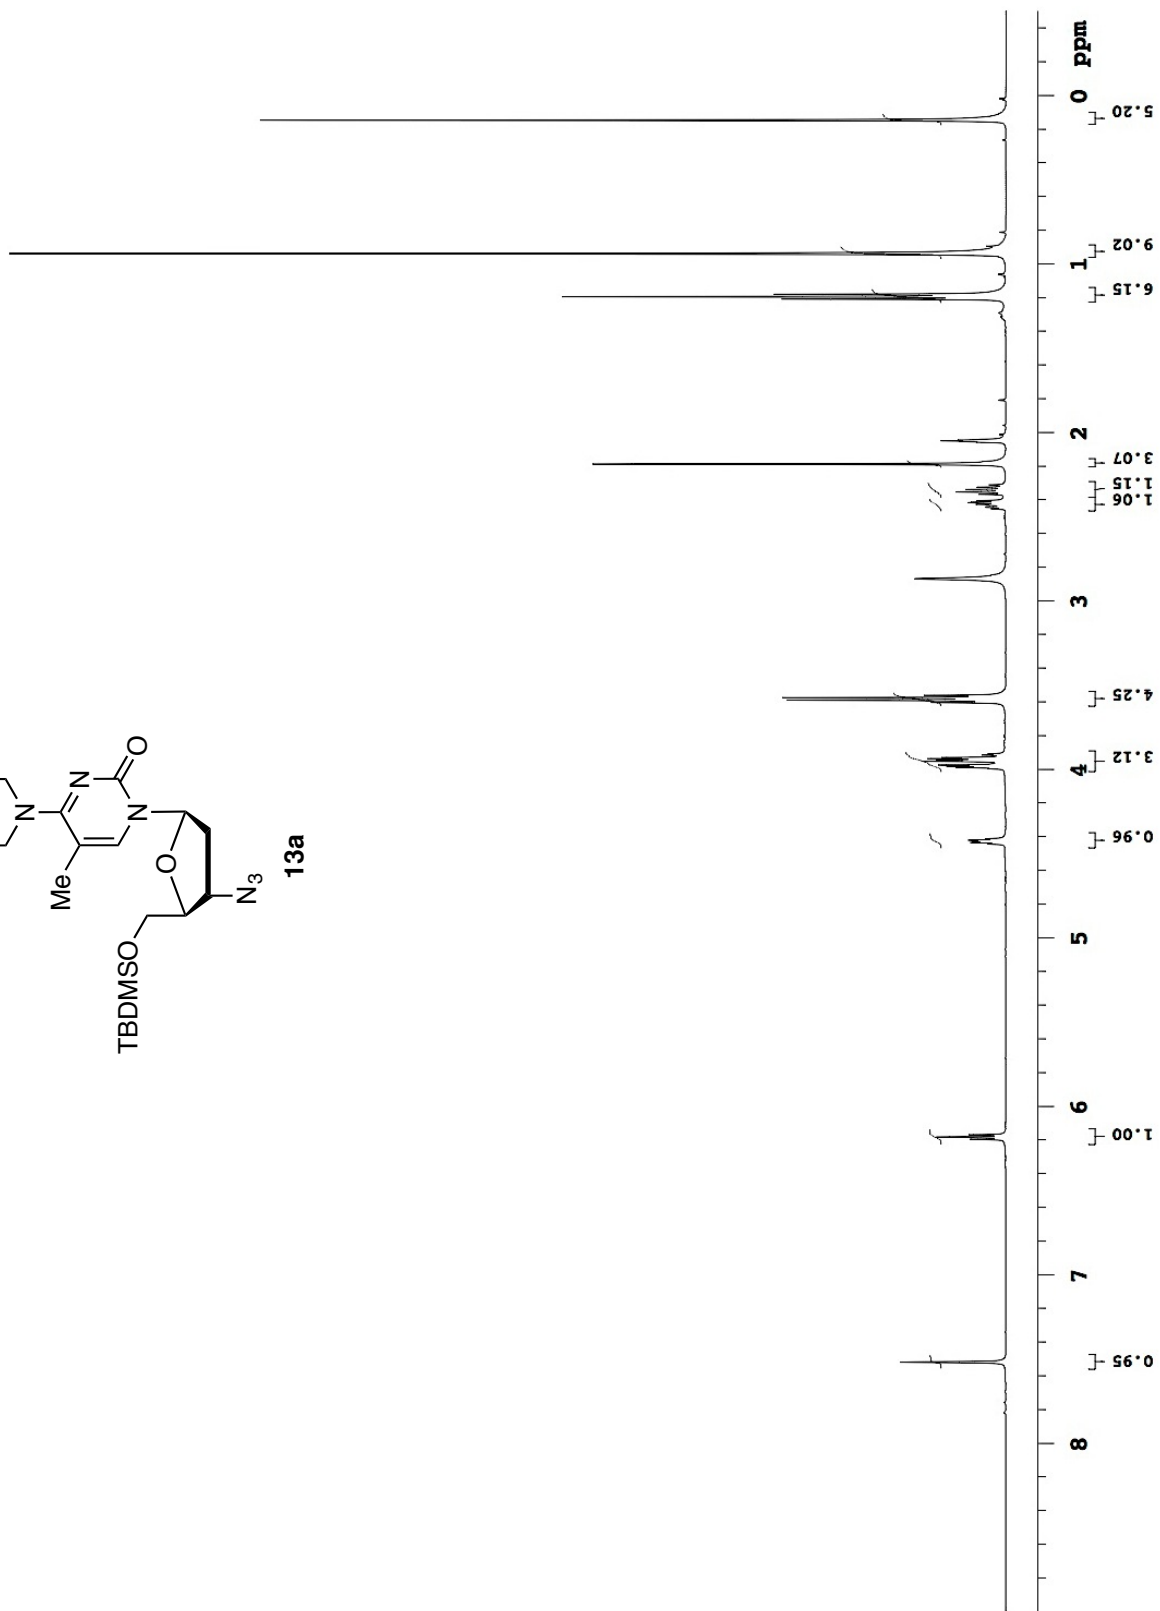

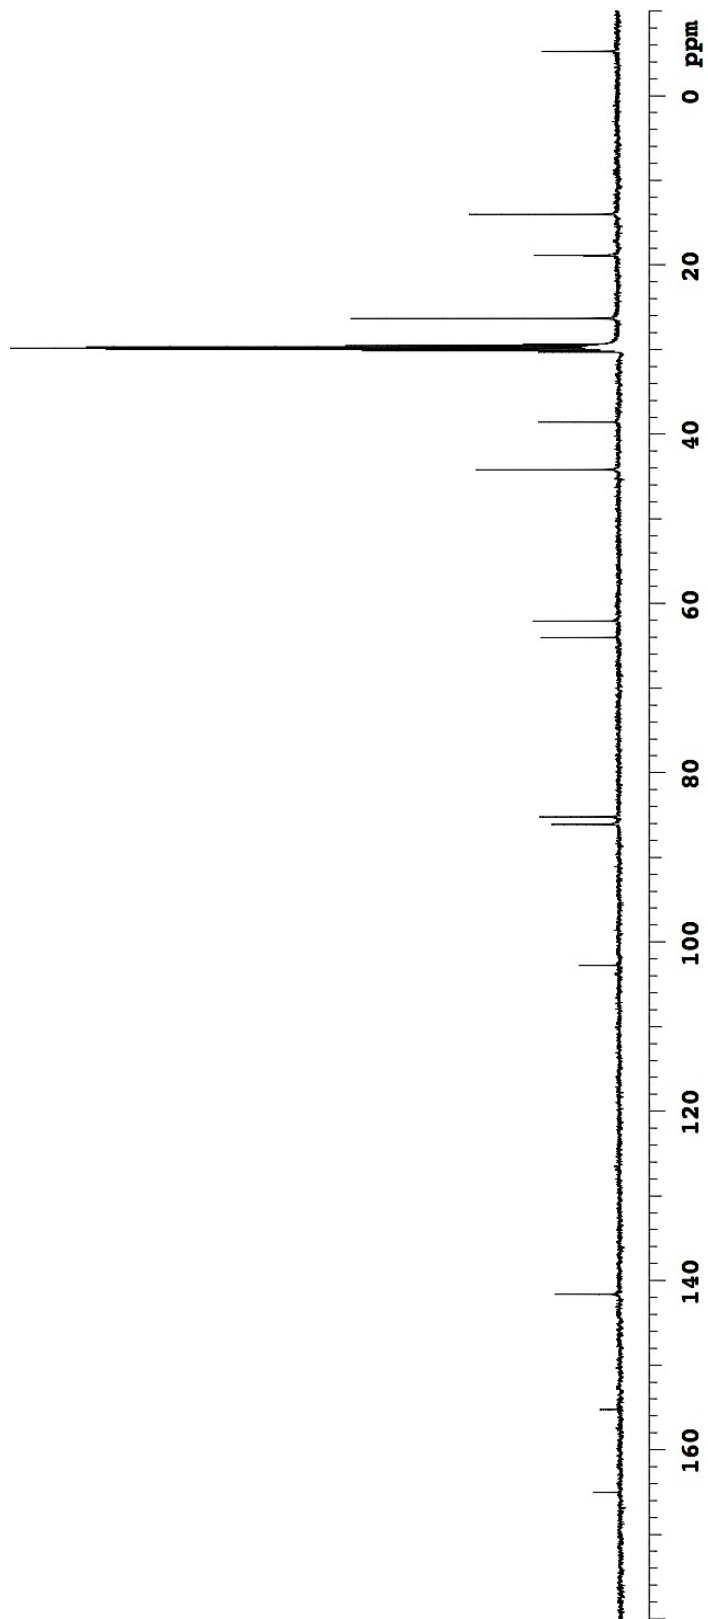

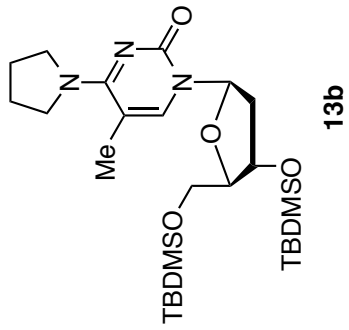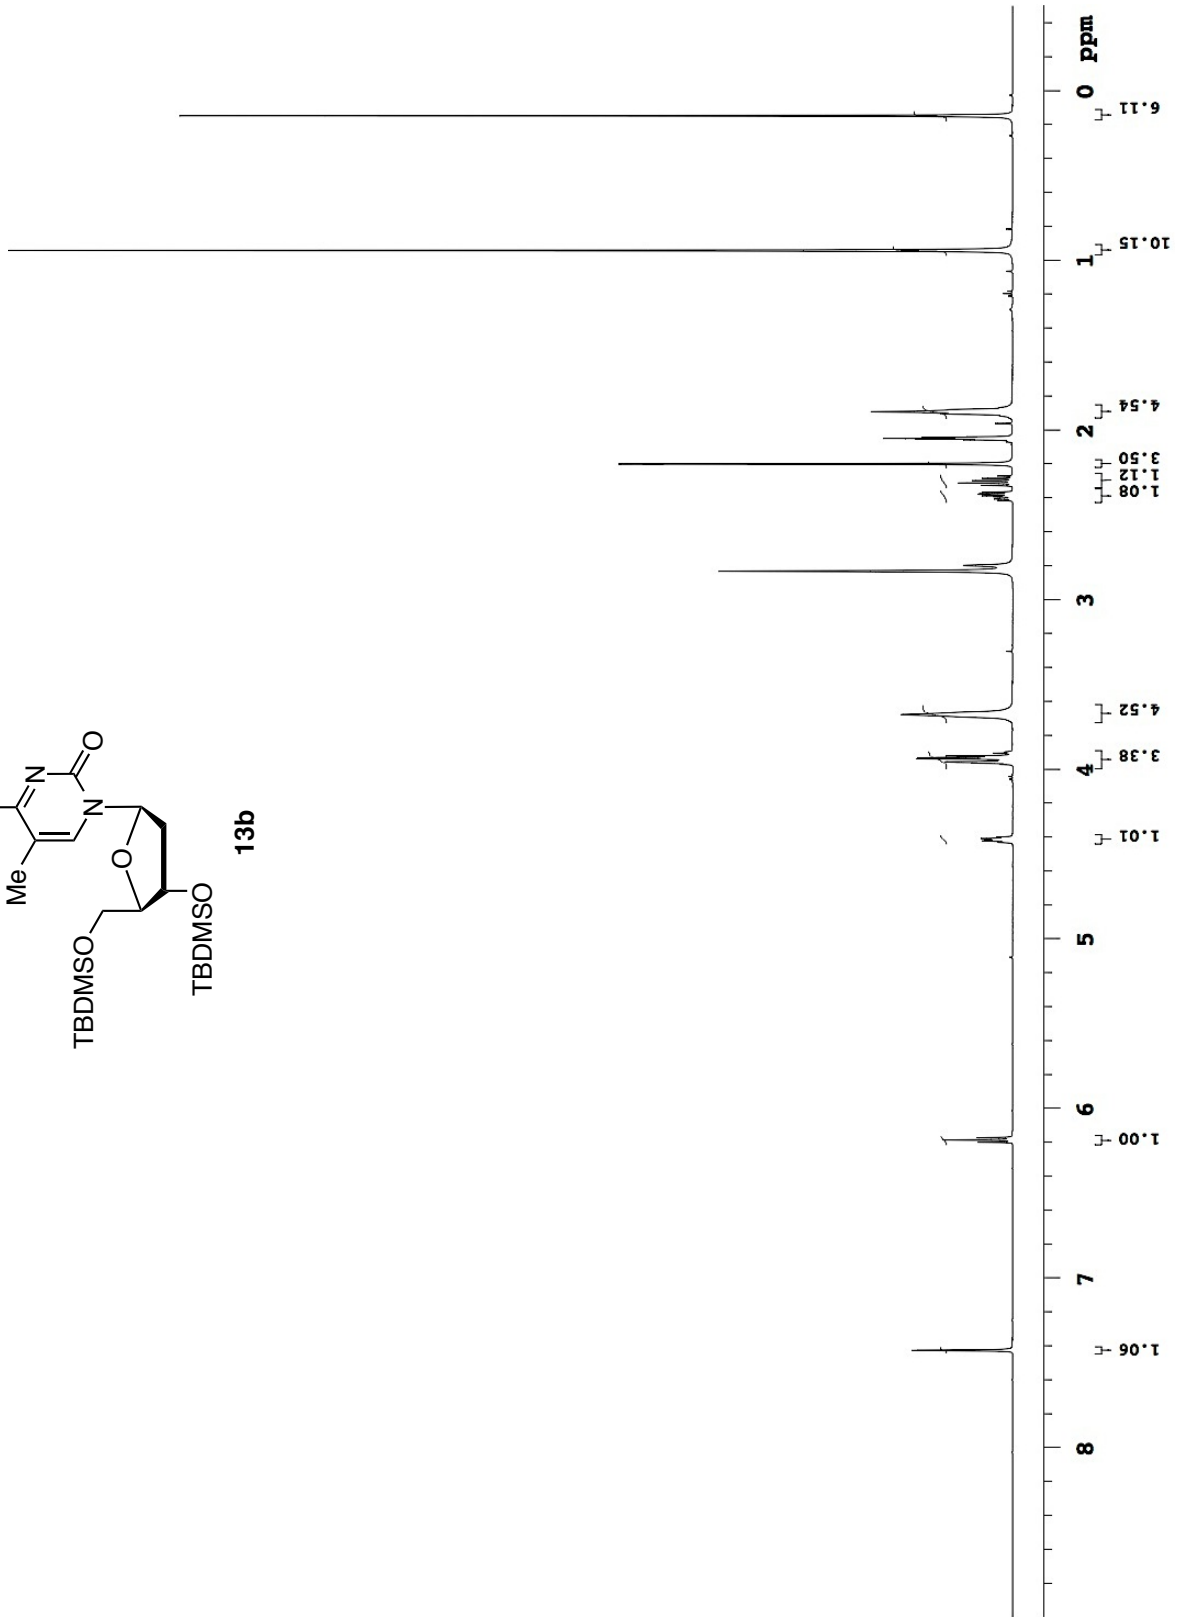

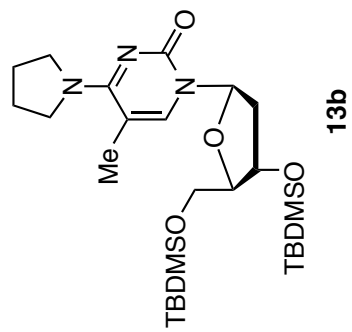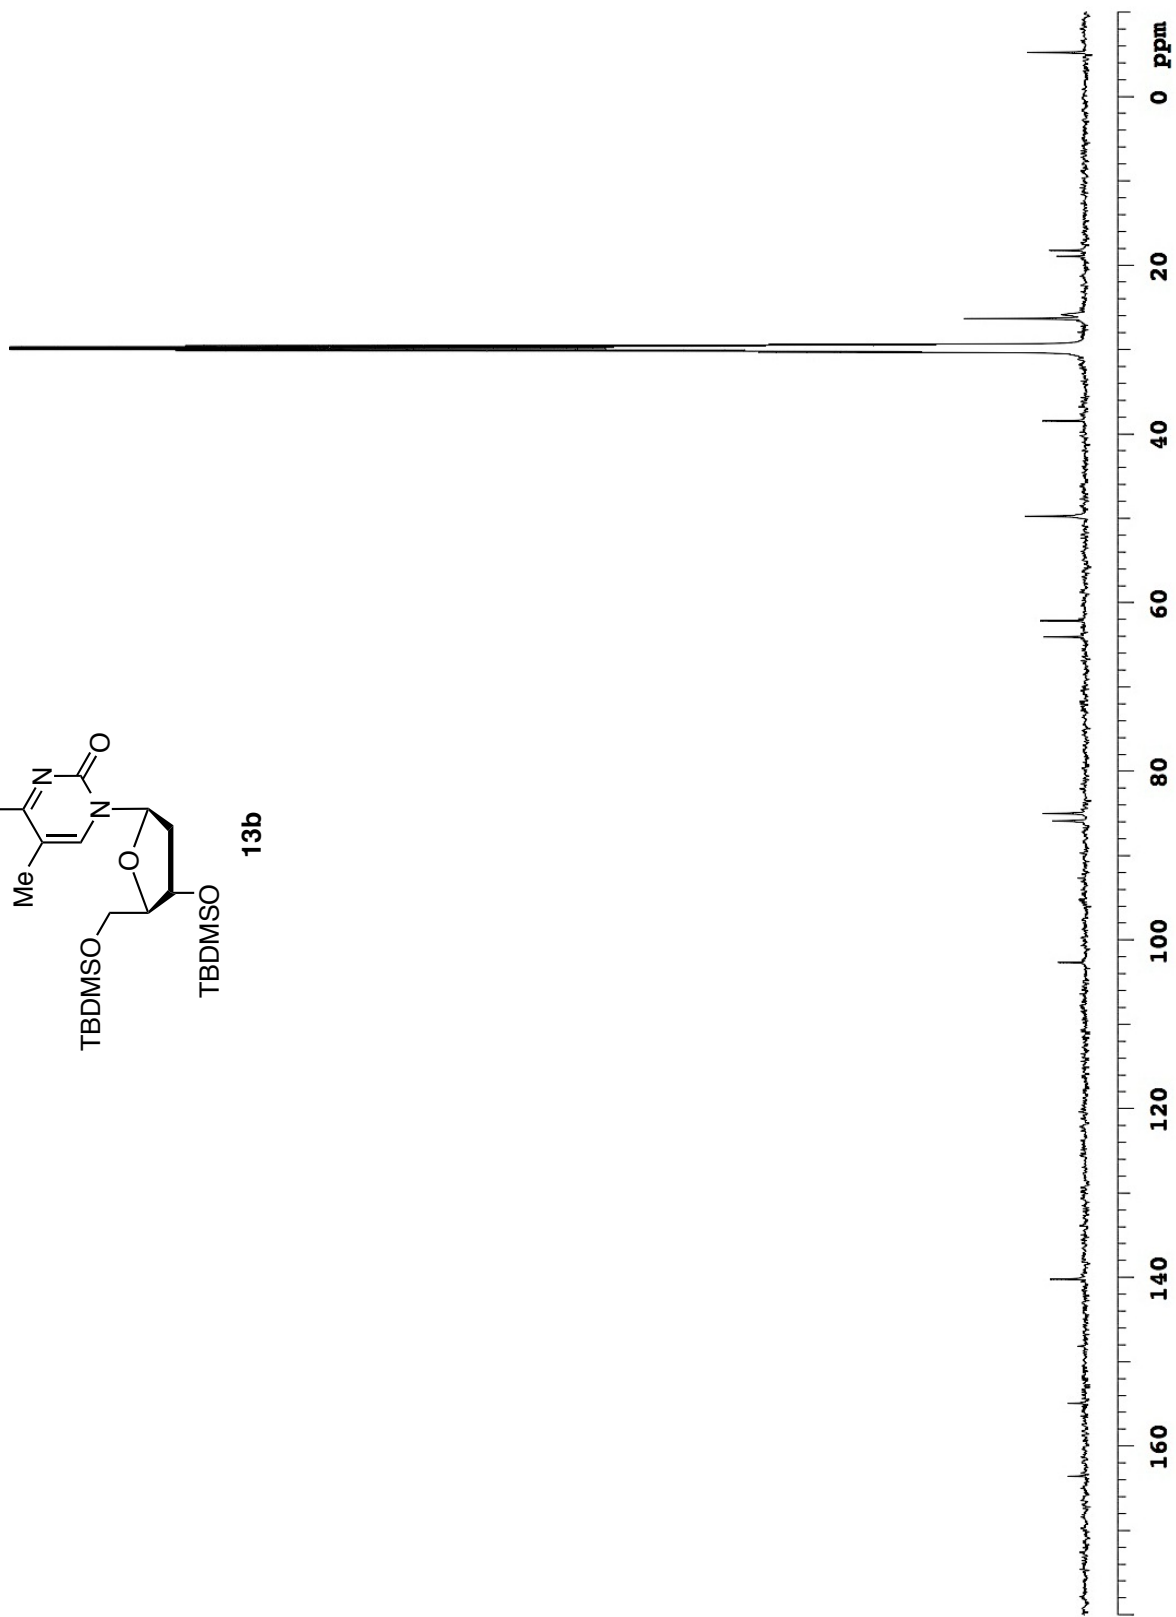



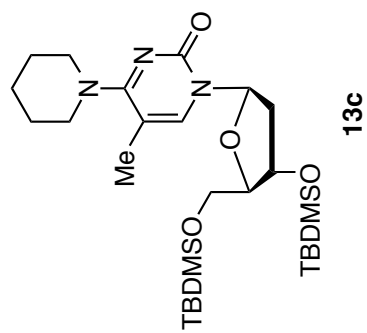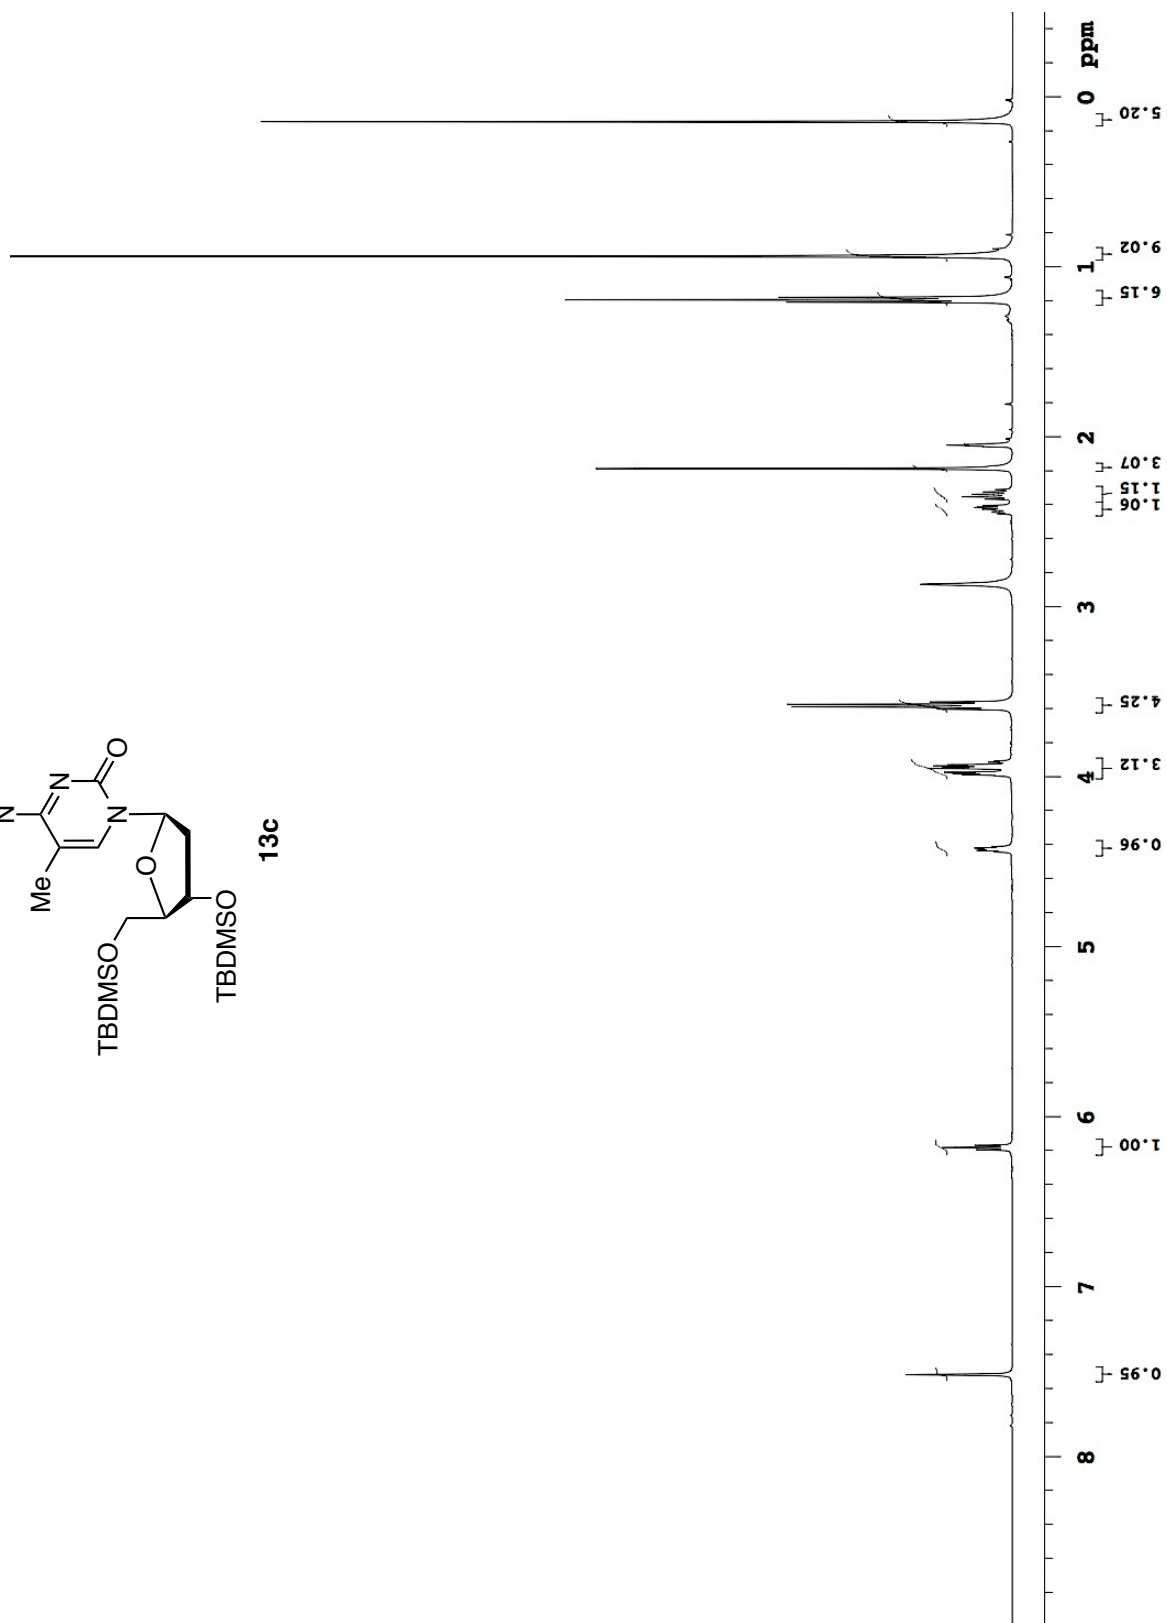

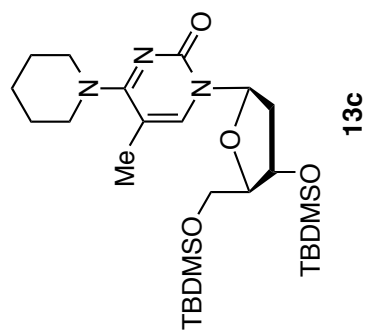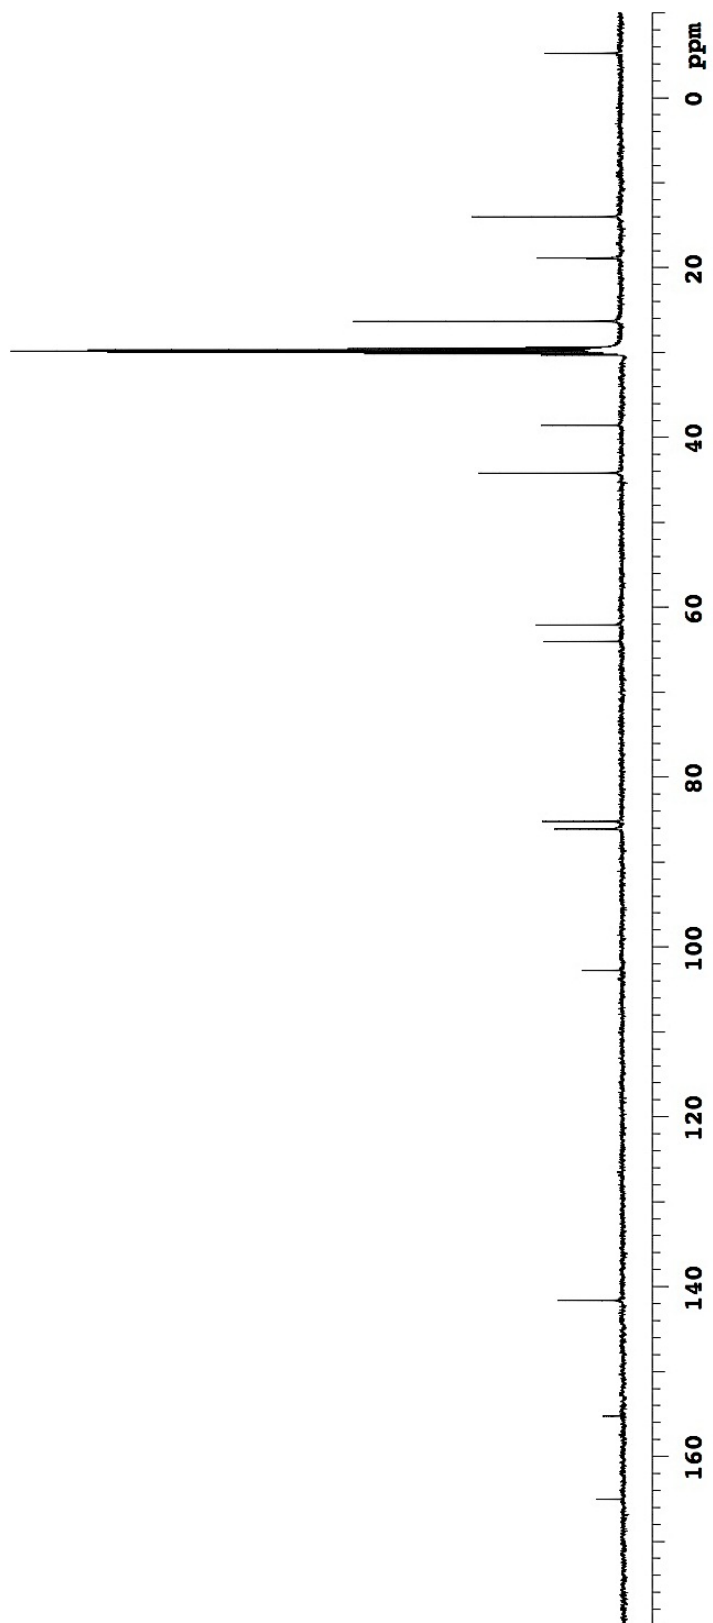

gCOSY spectrum of compound **13c** in acetone-*d*<sub>6</sub>

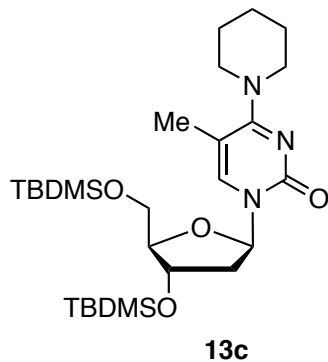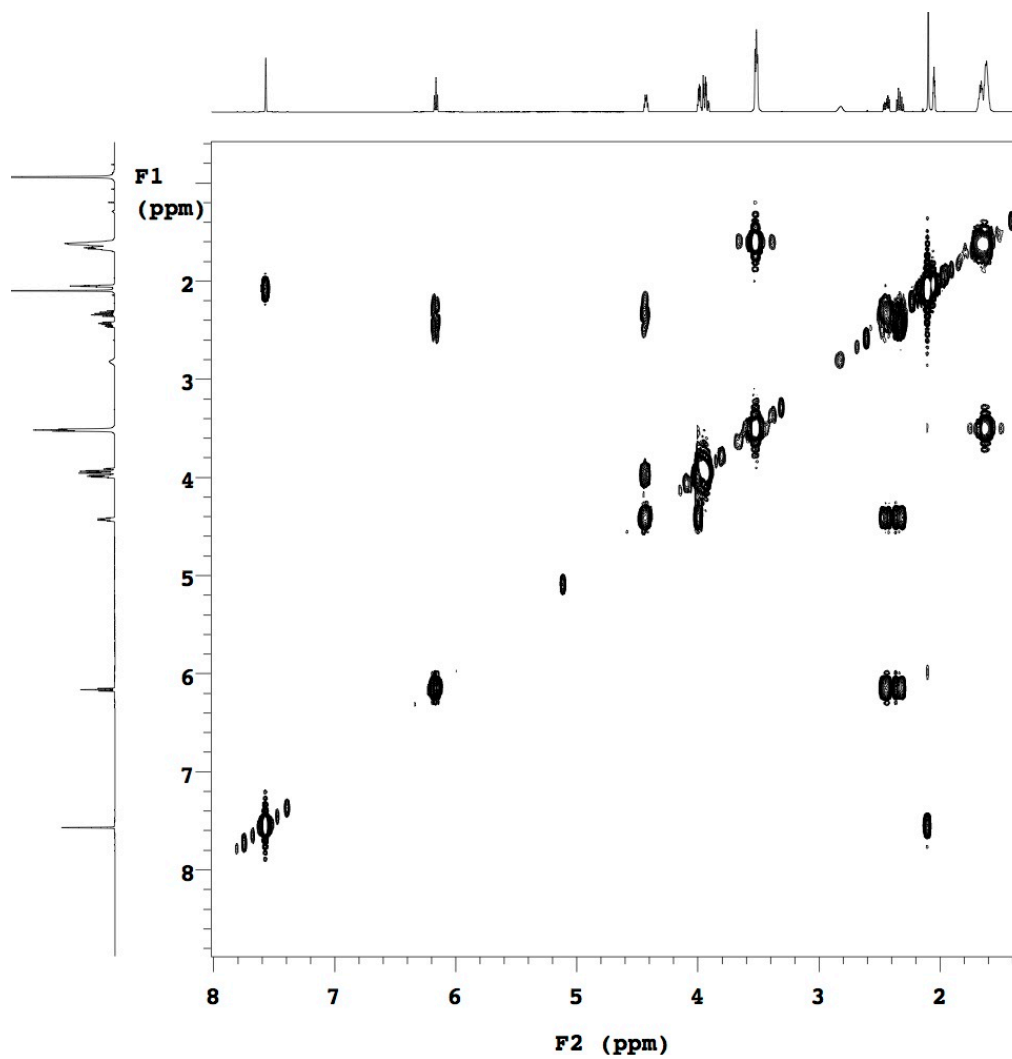

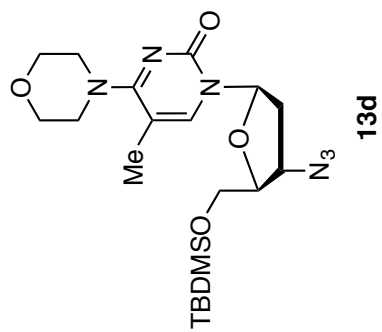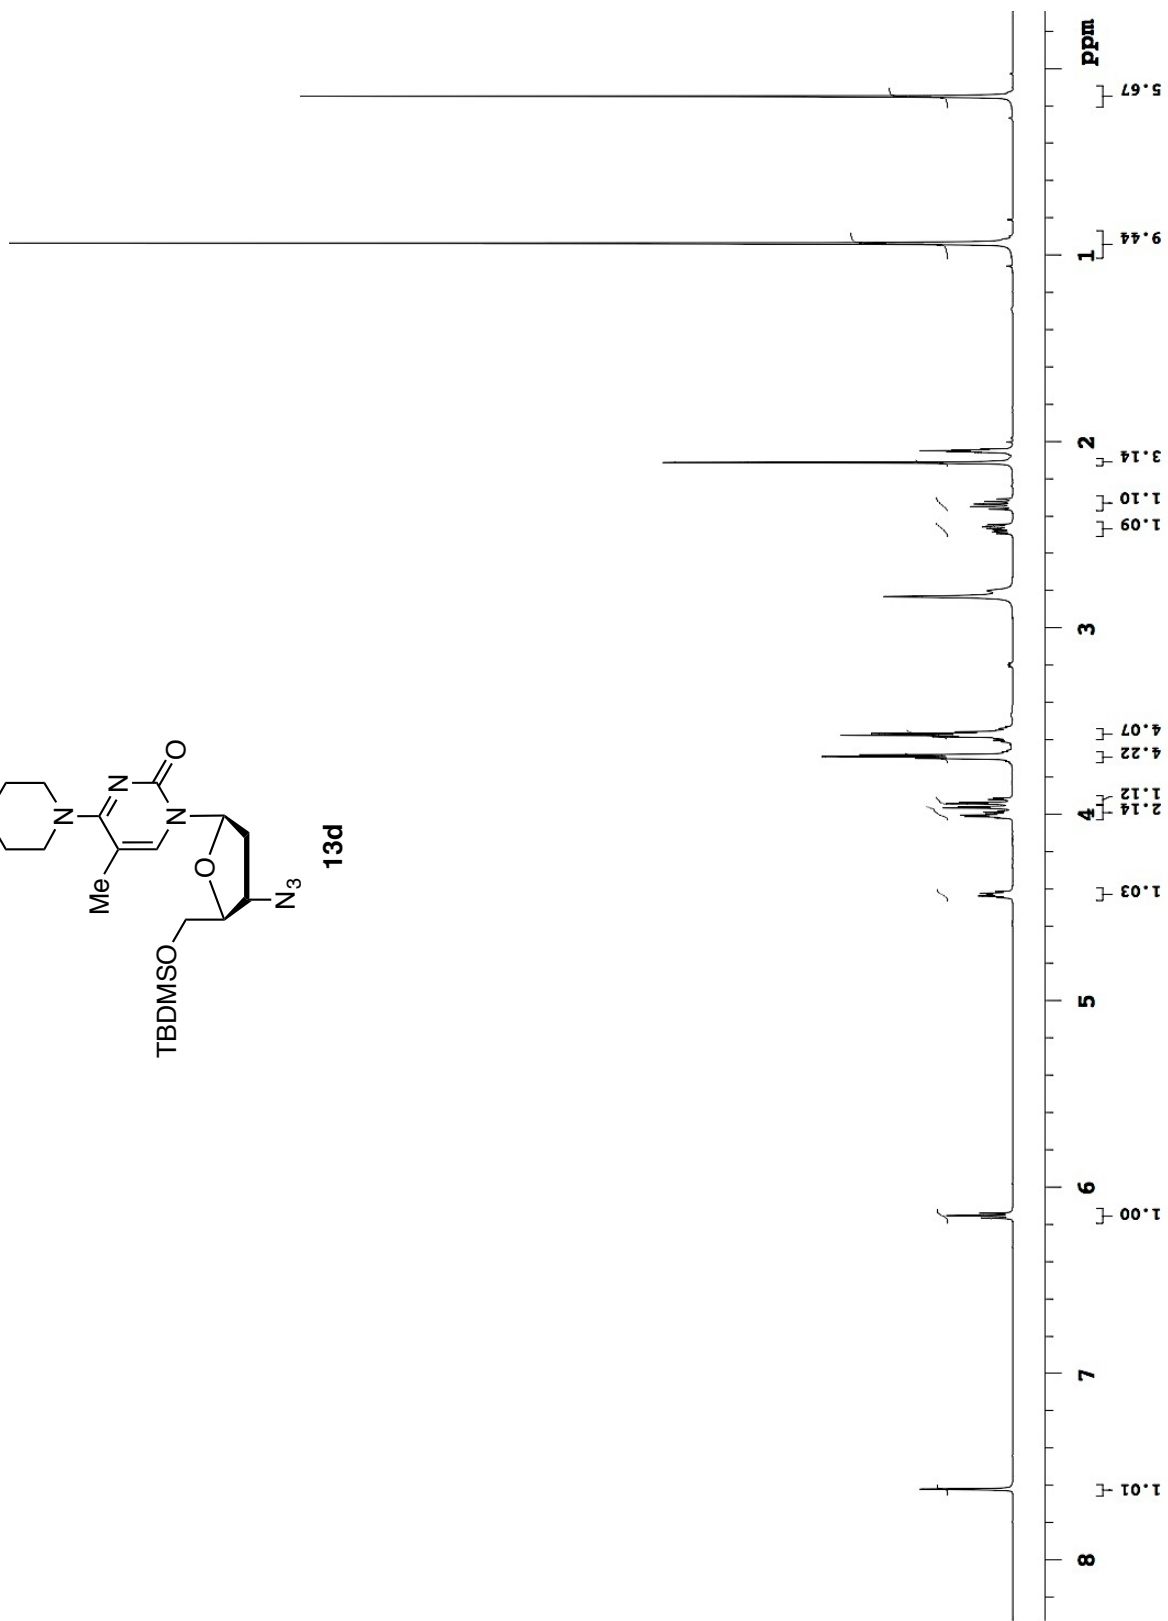

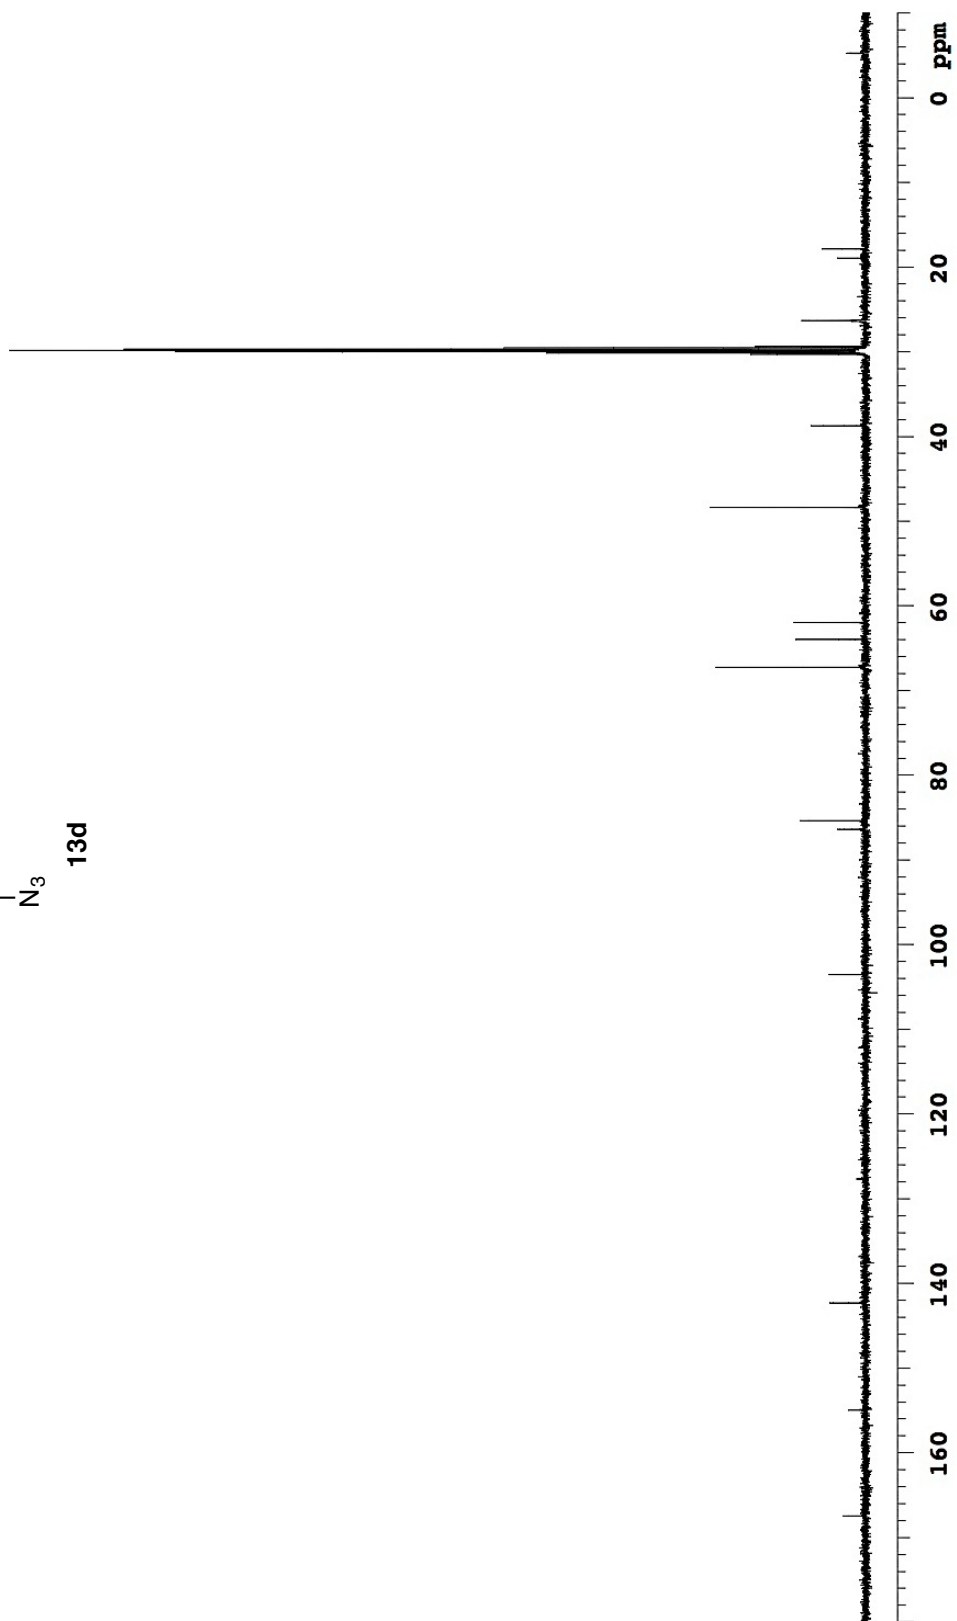

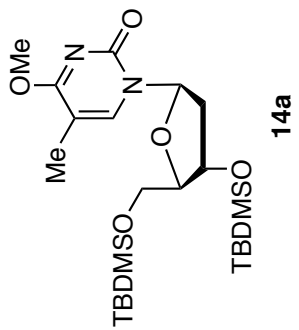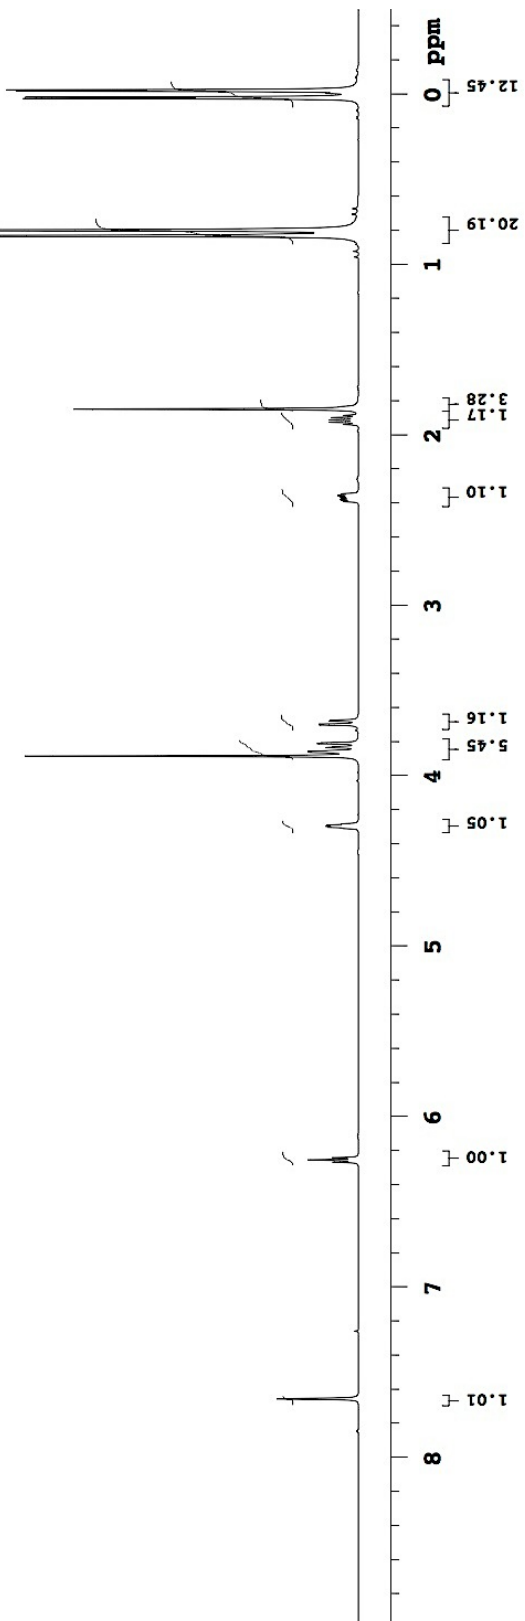

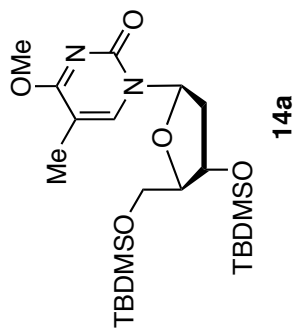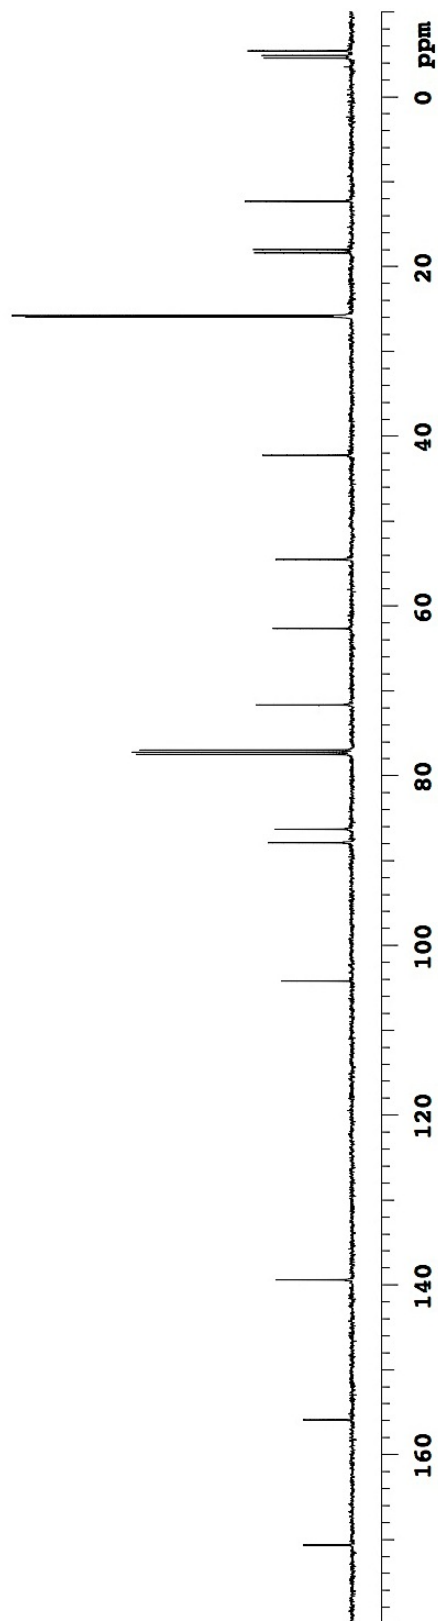

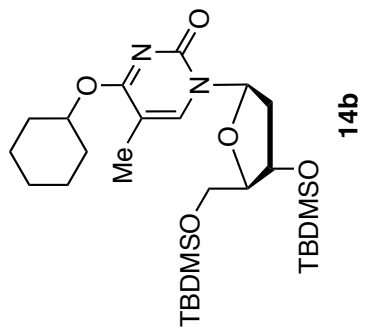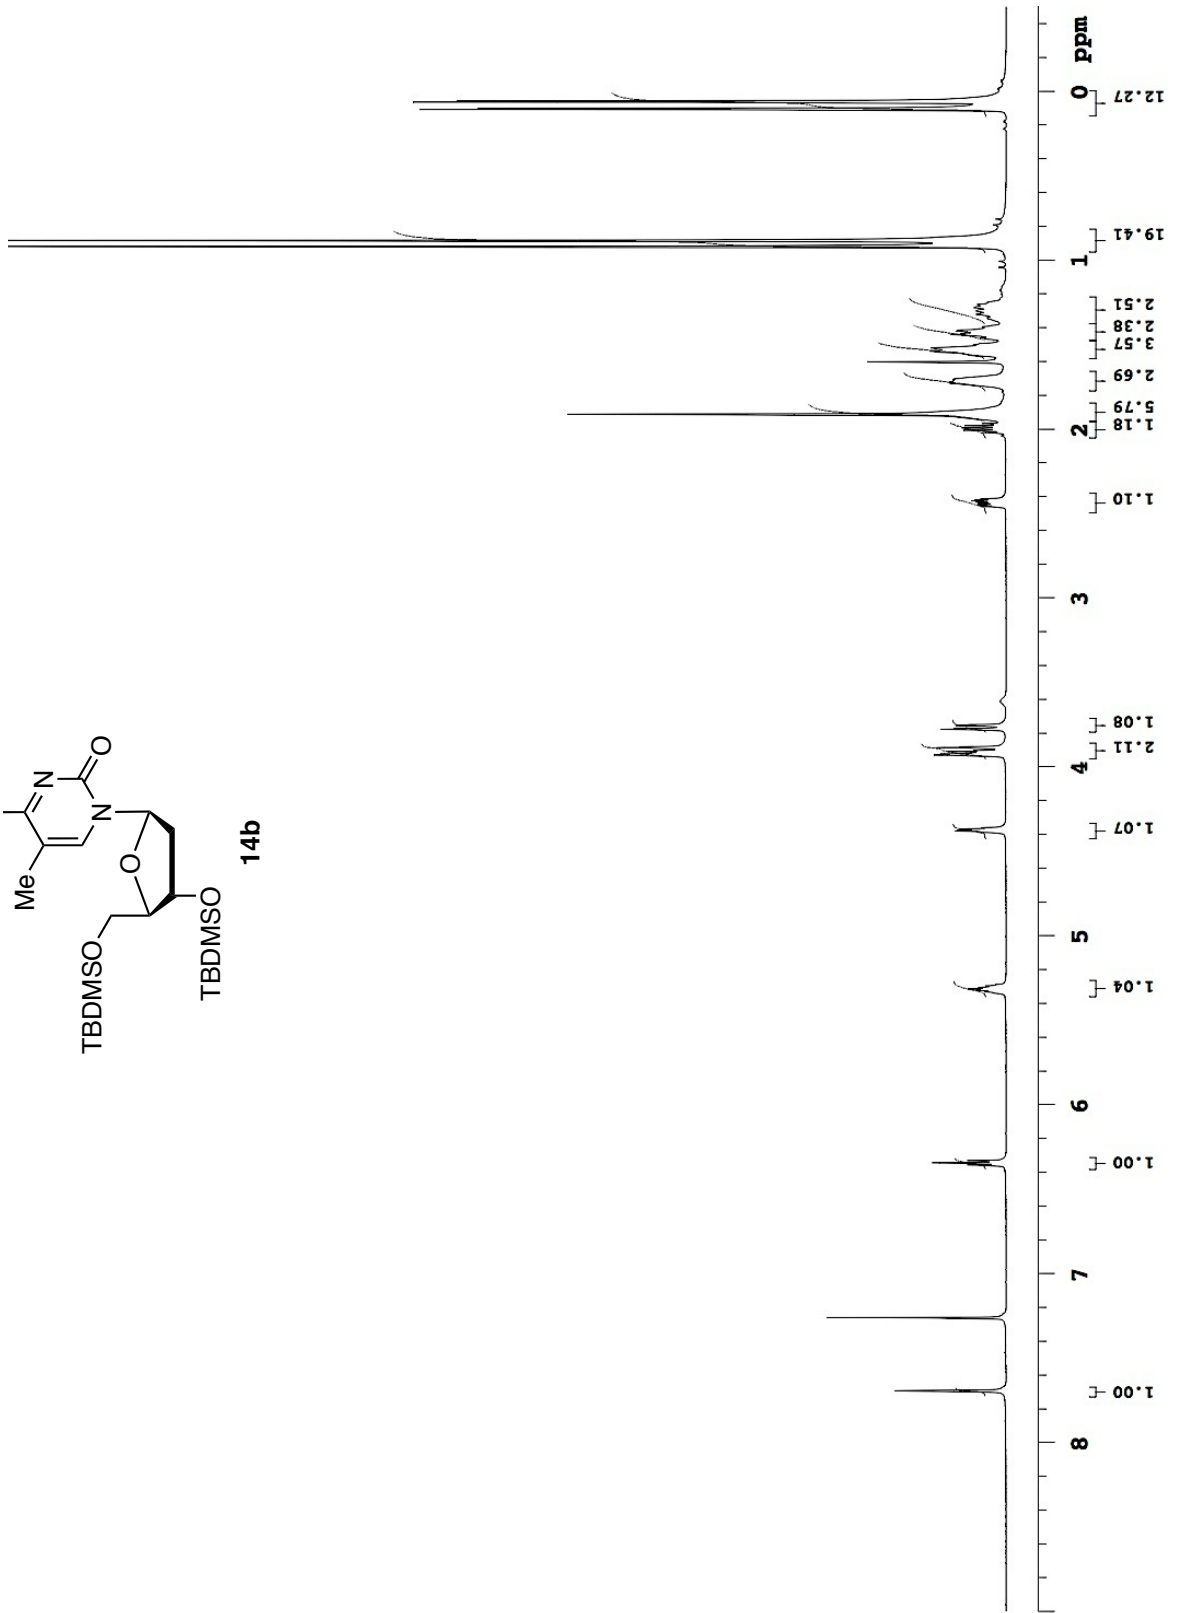



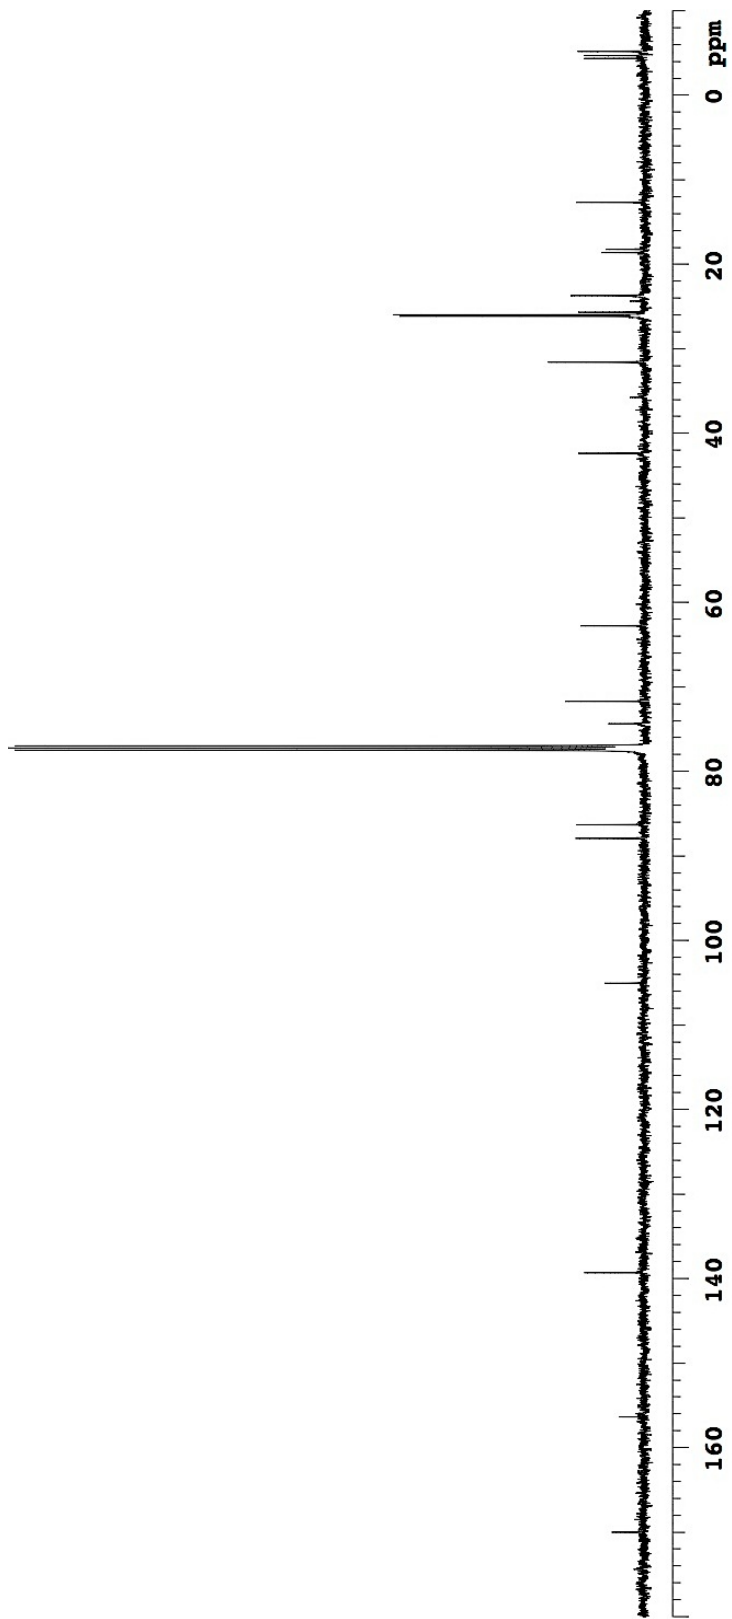

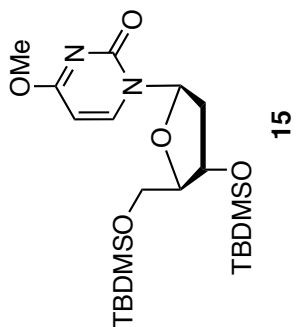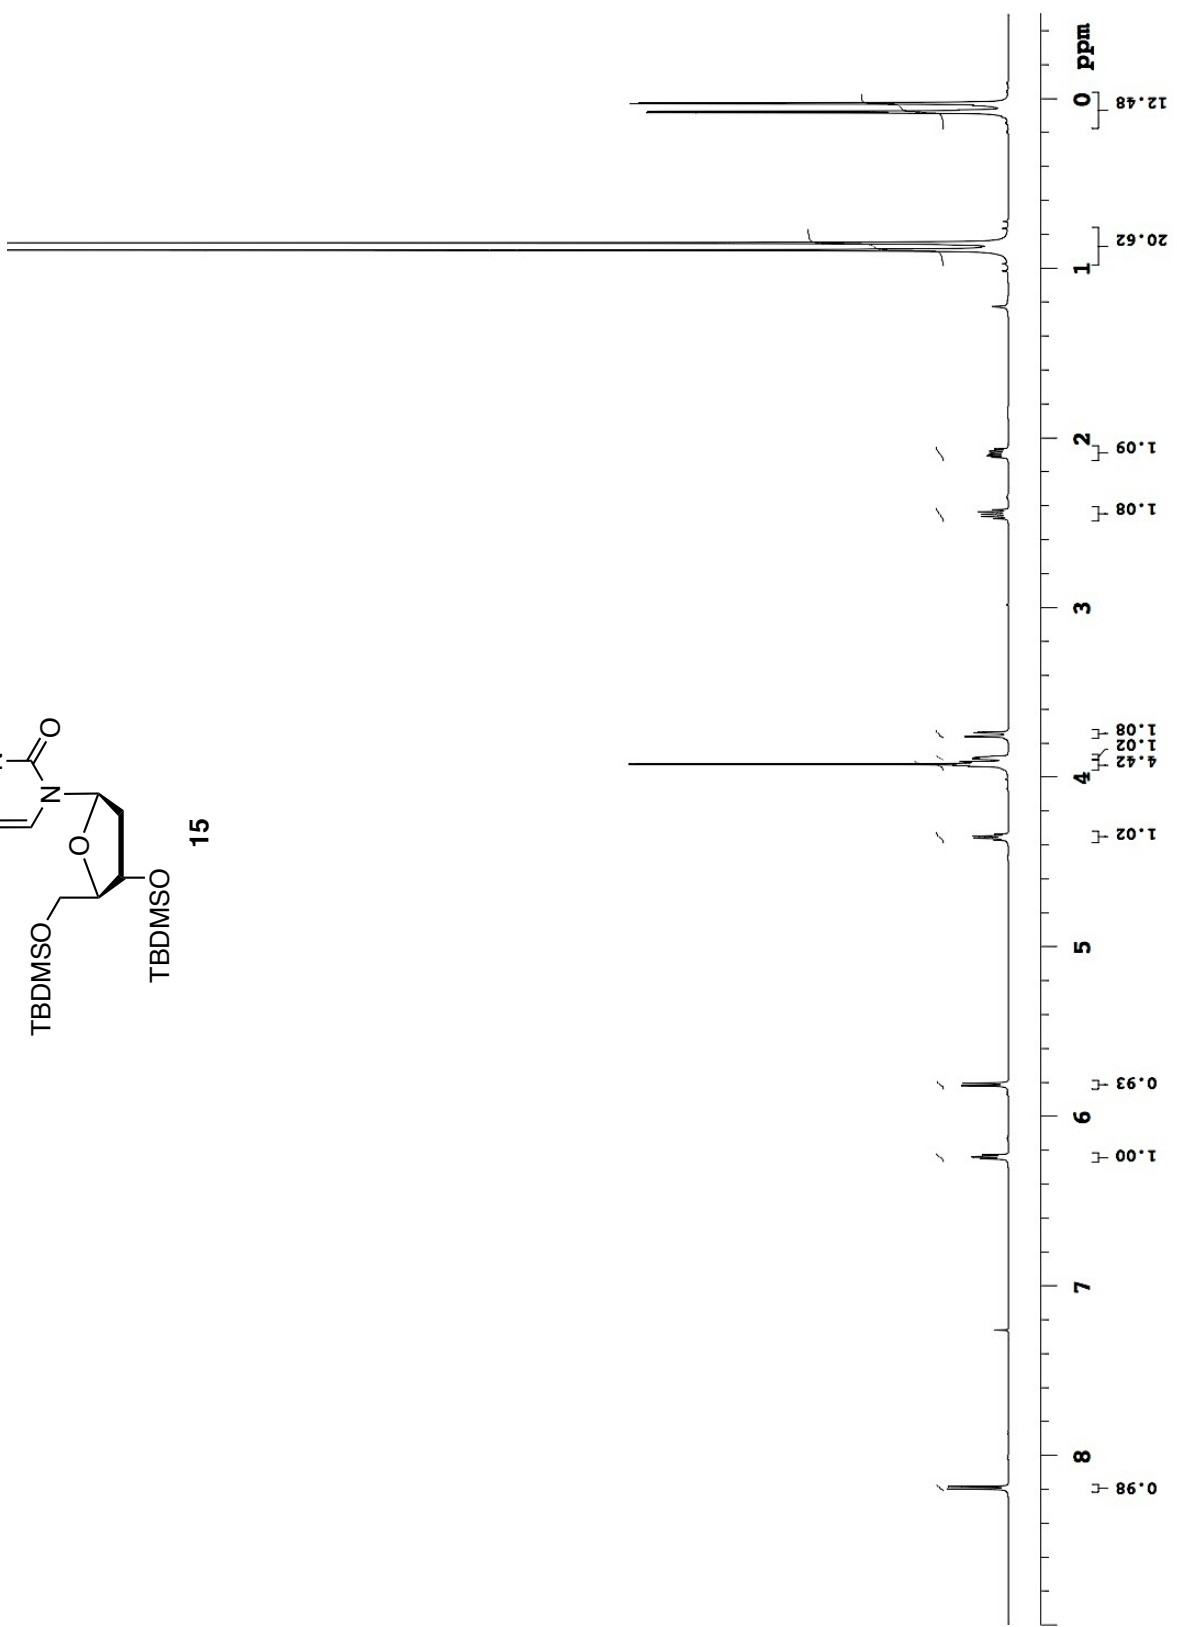

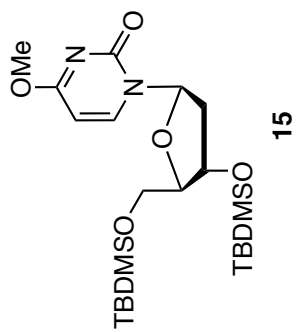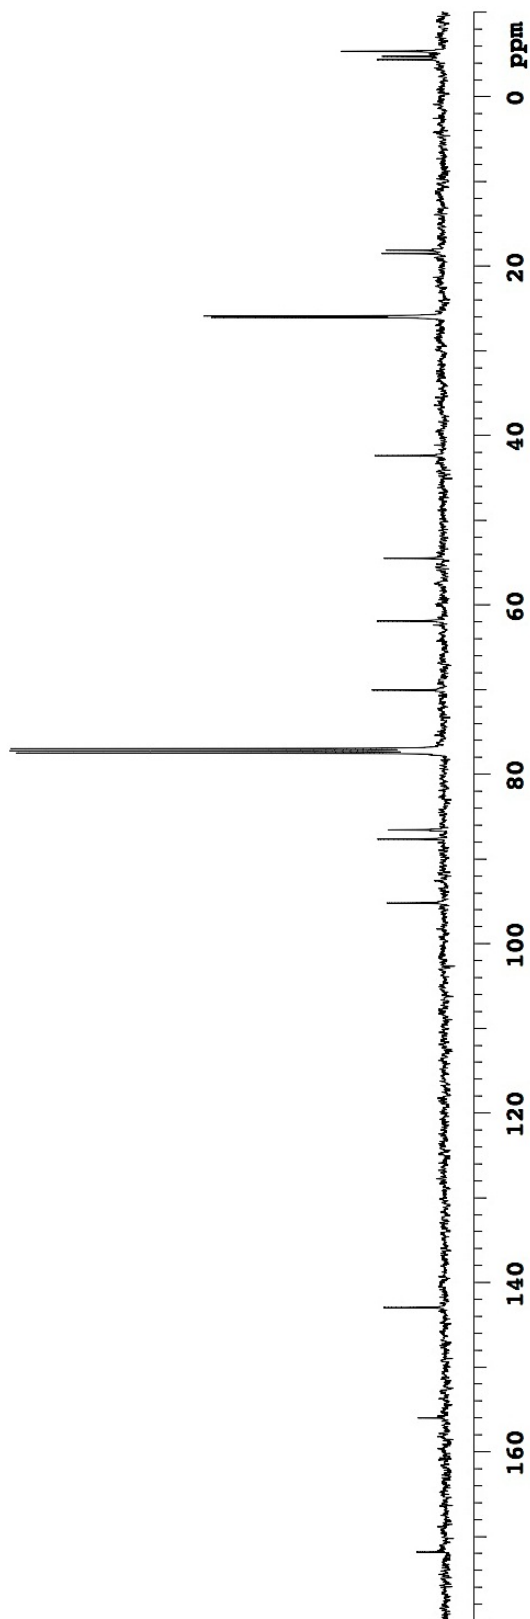

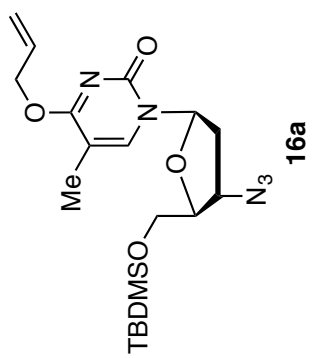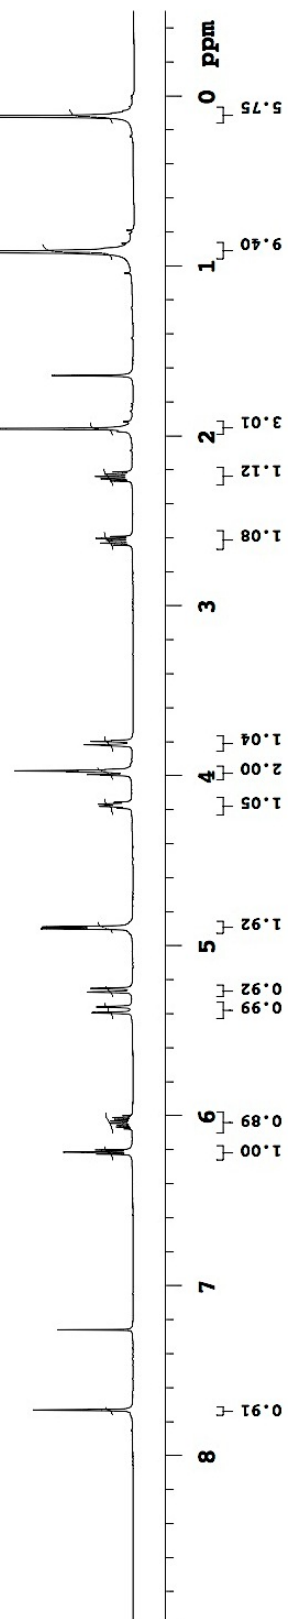

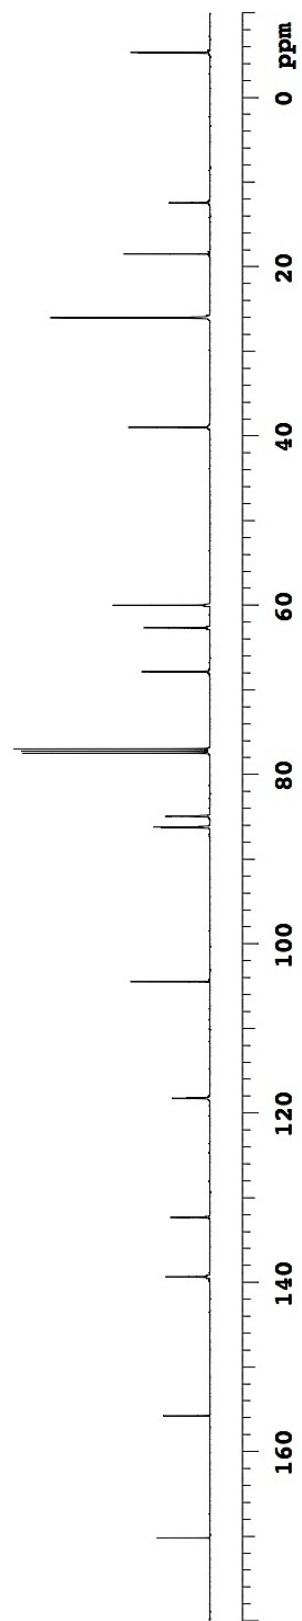

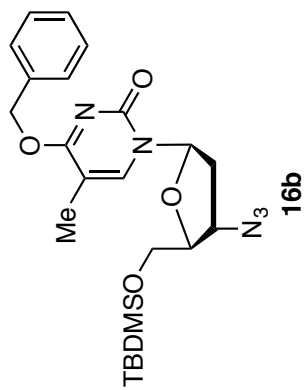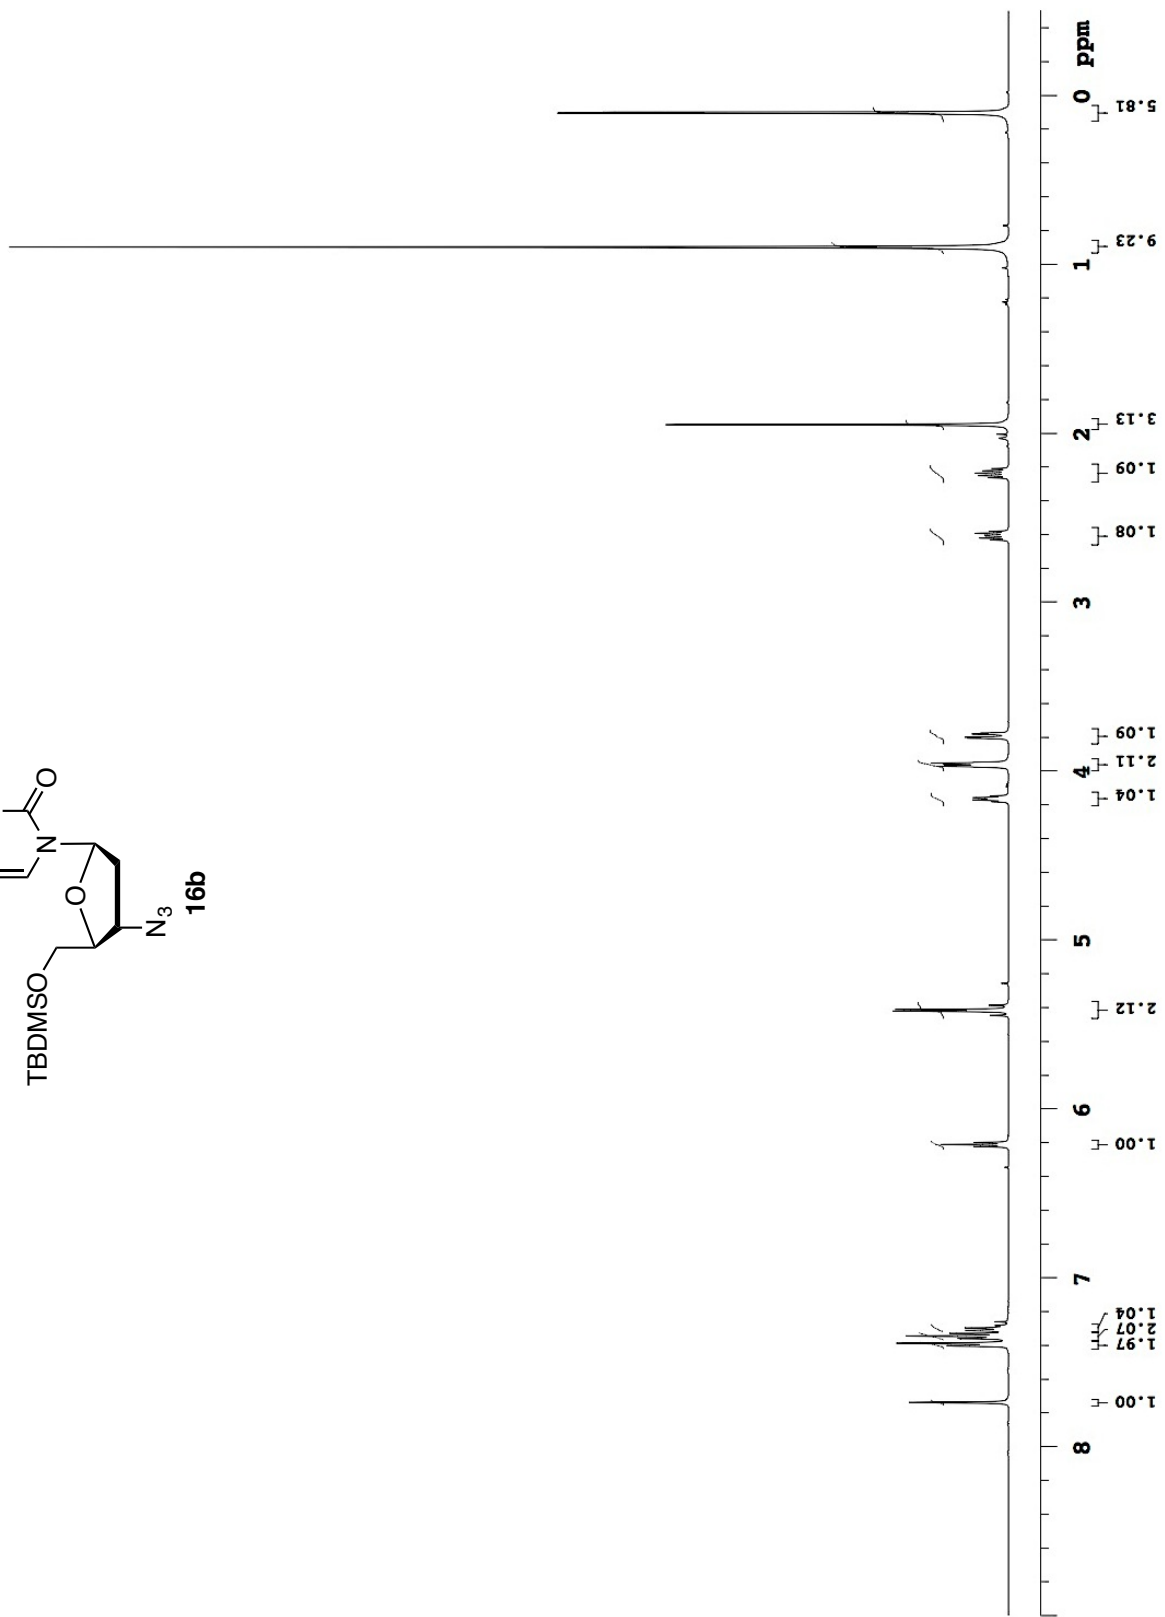

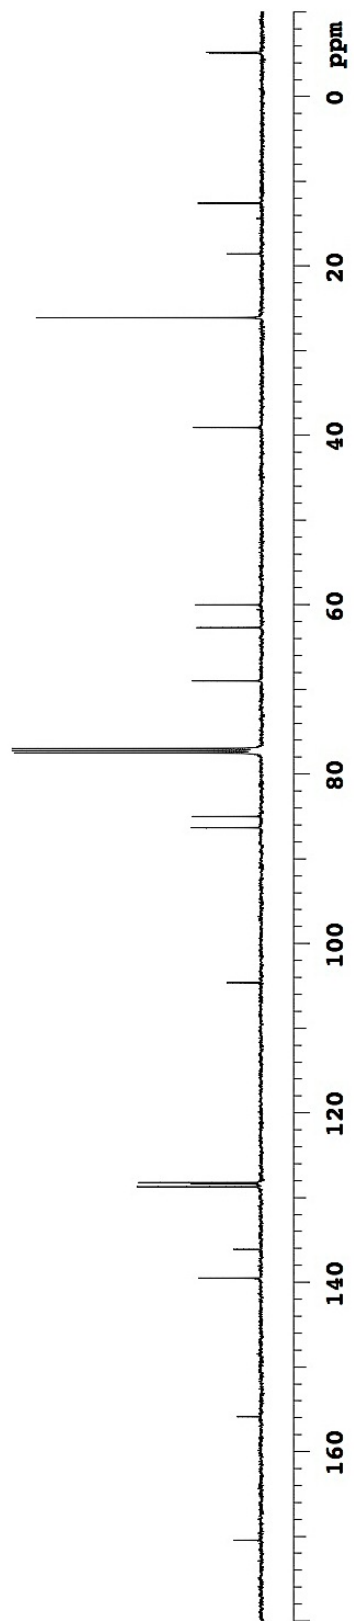

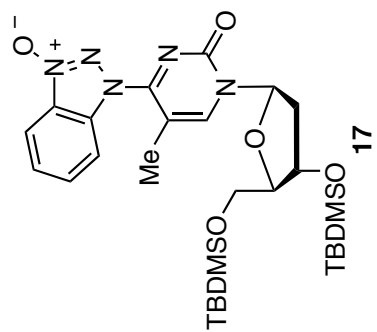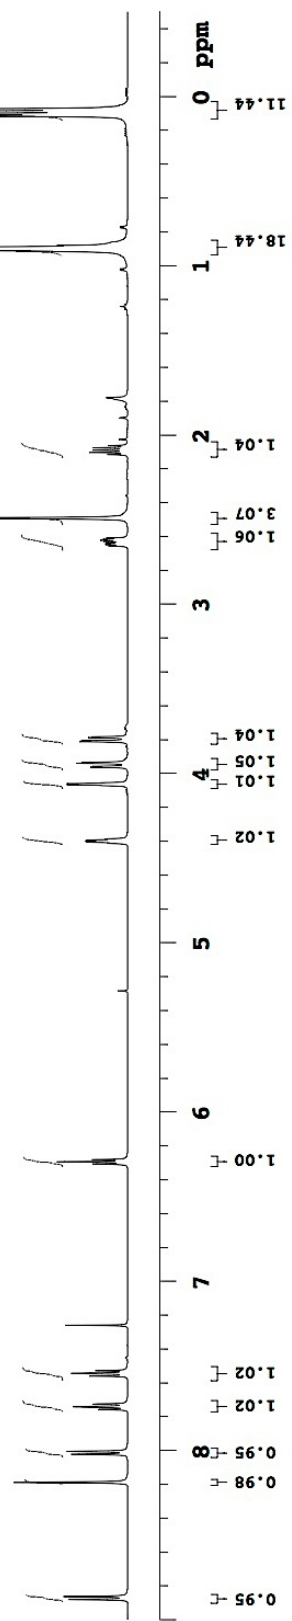



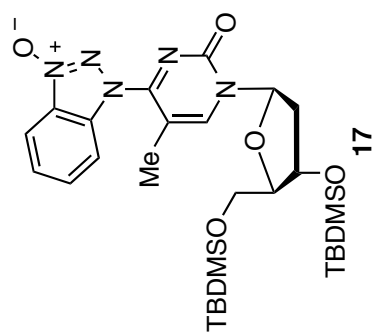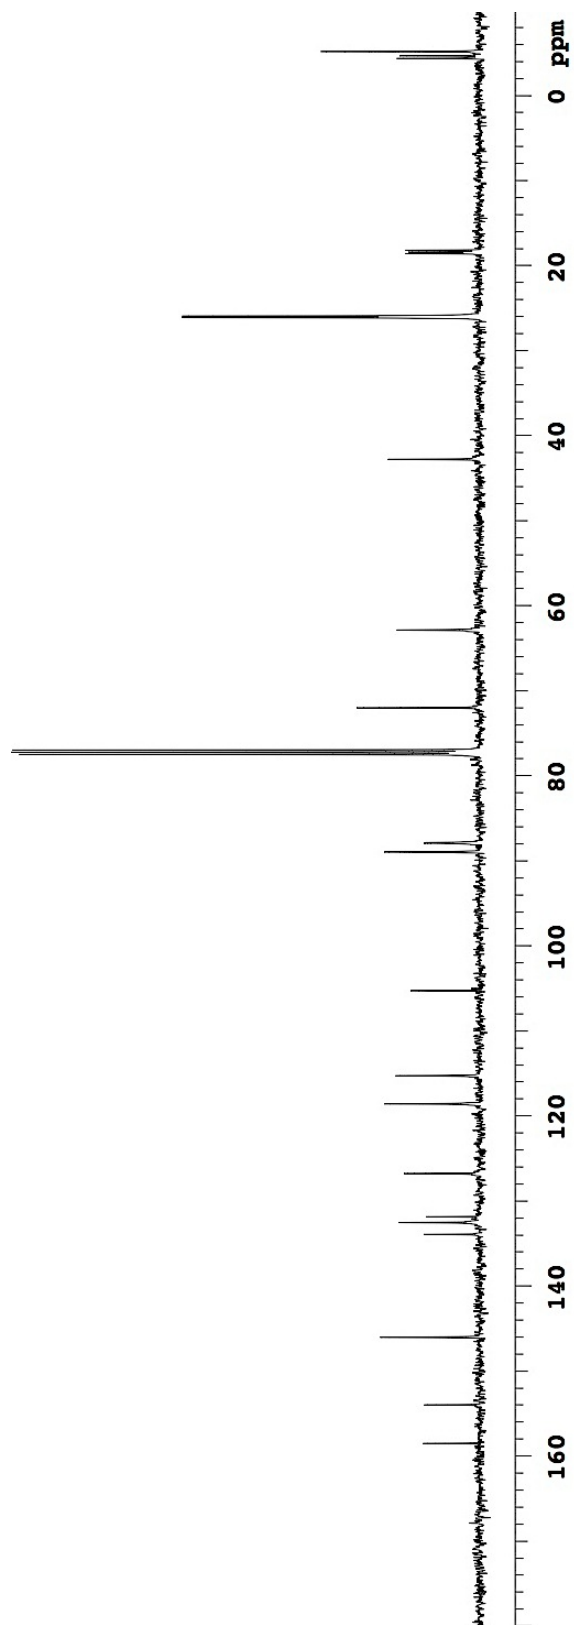

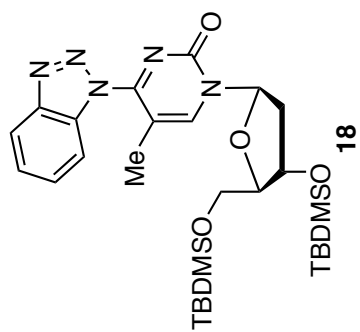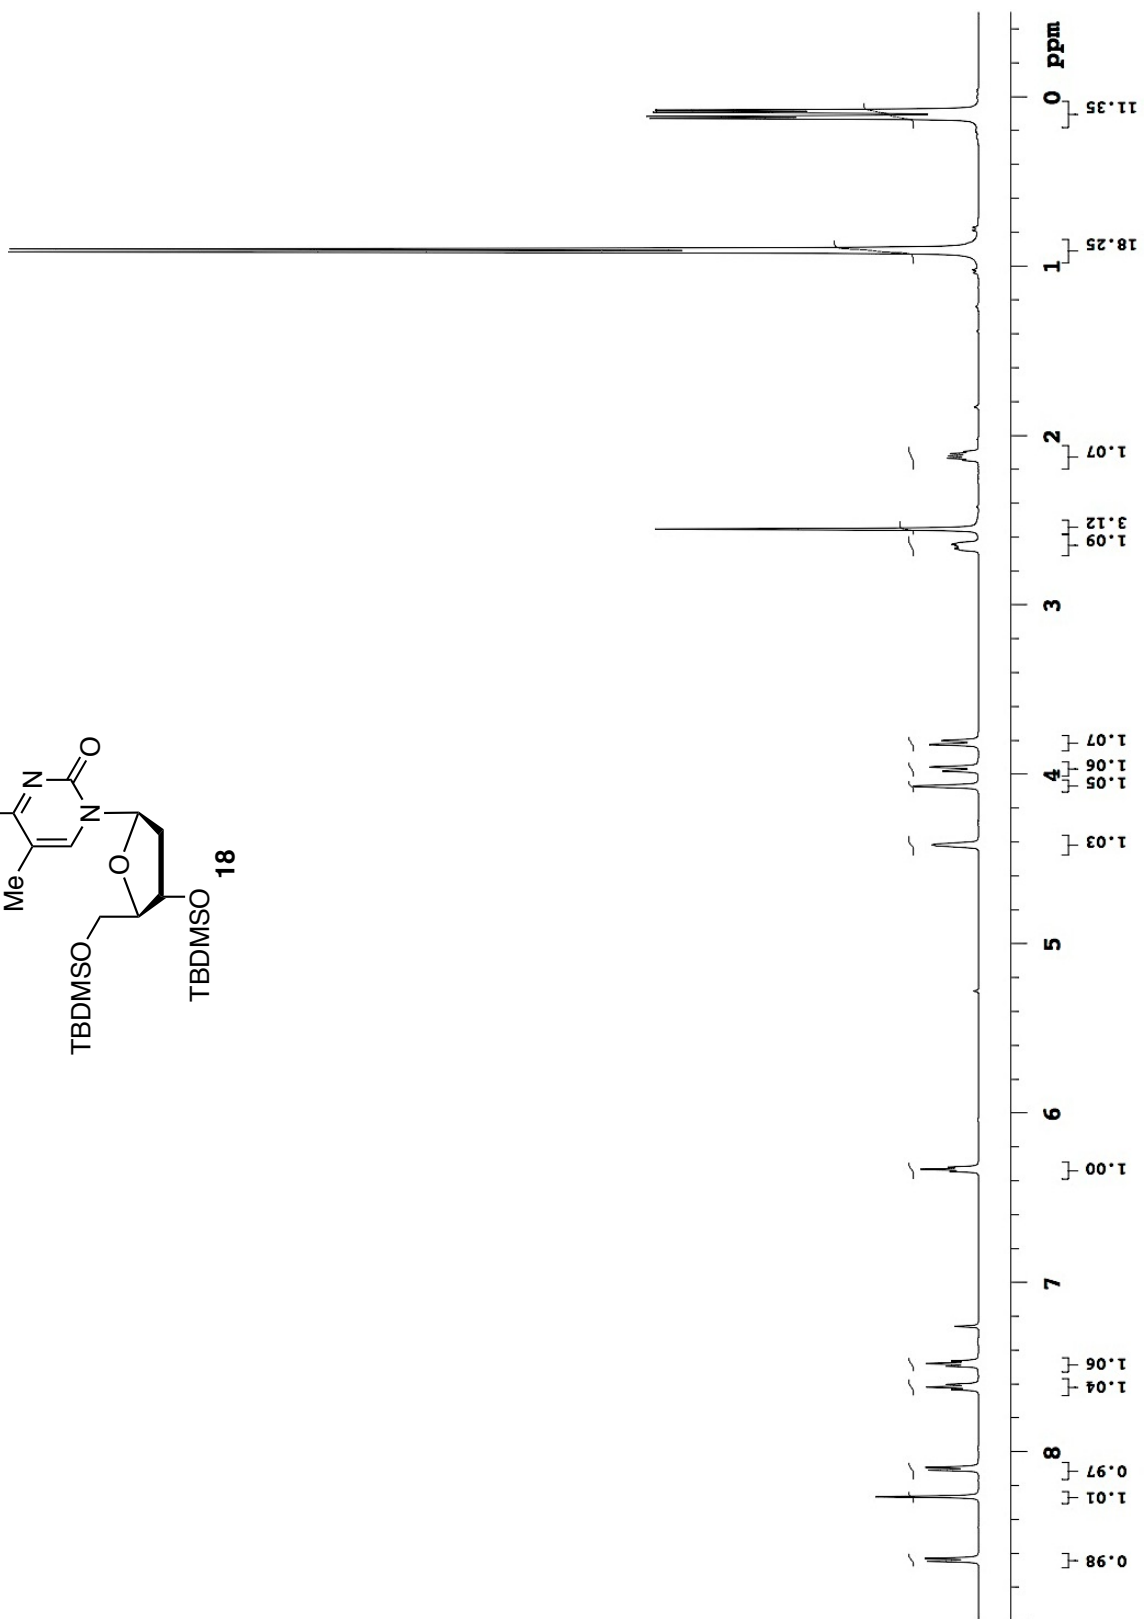

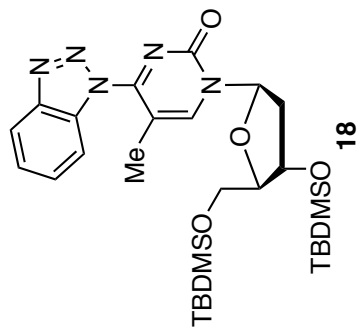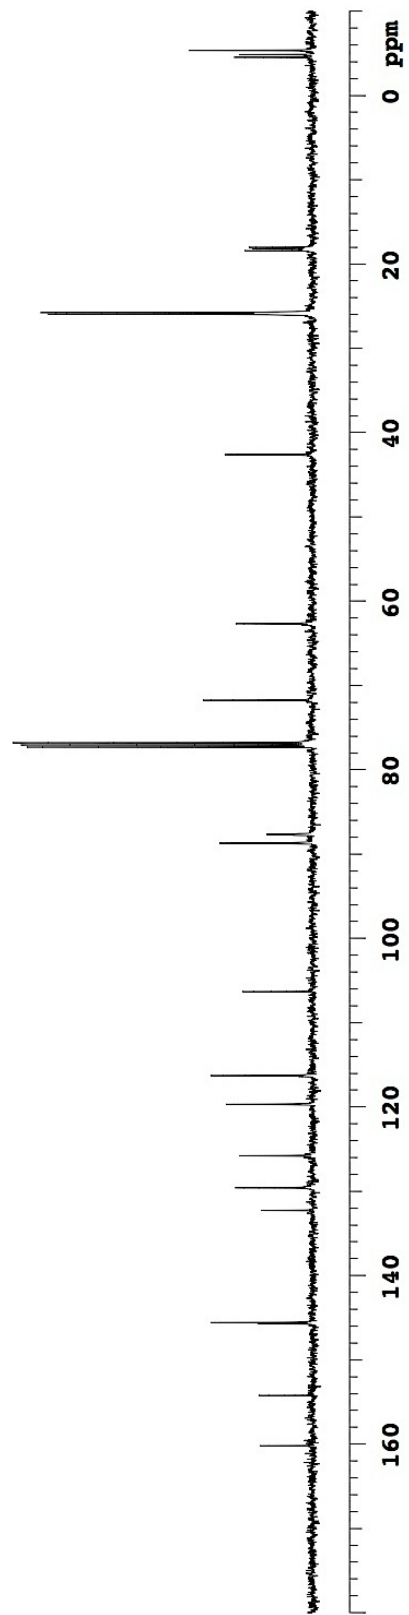

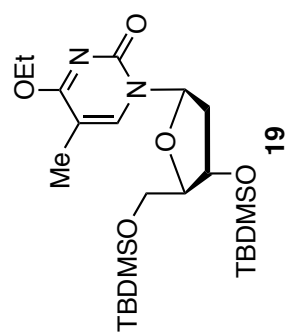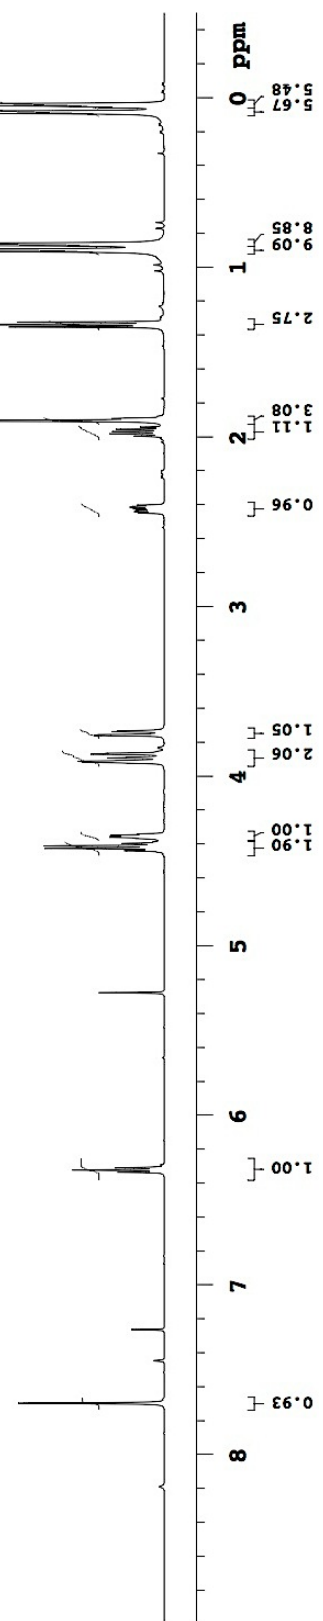

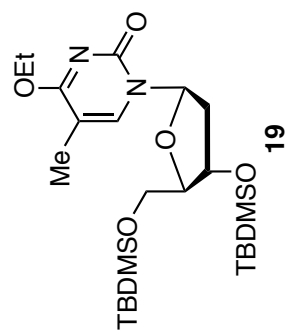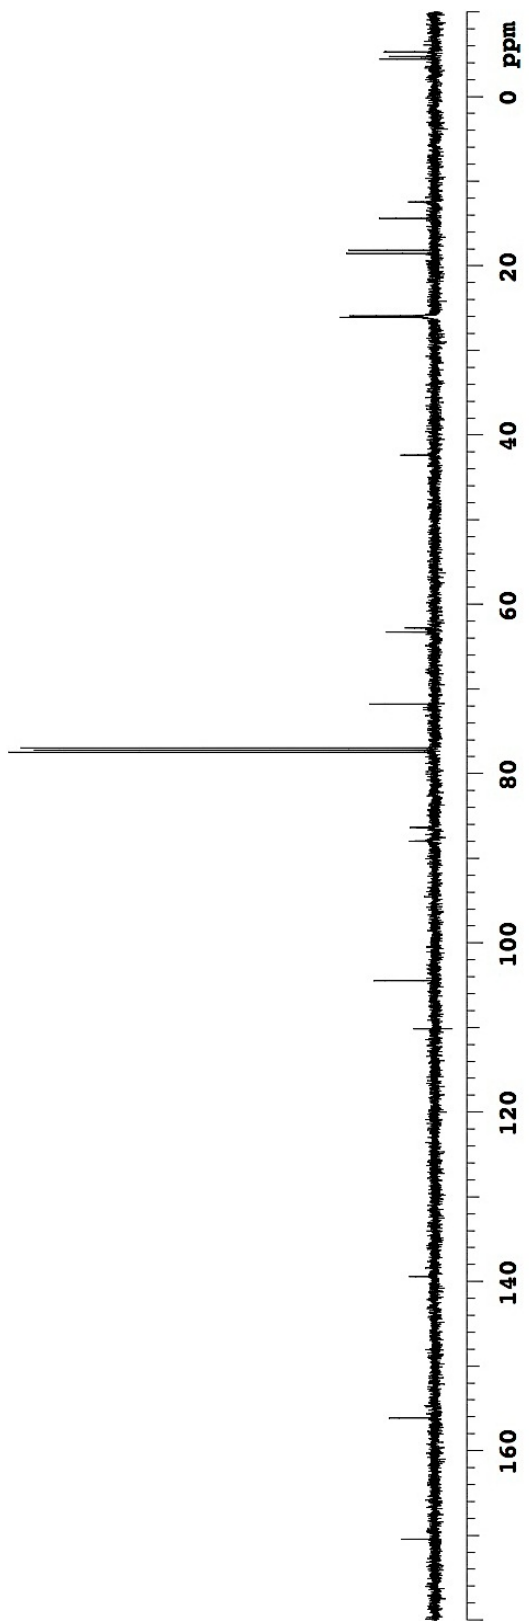

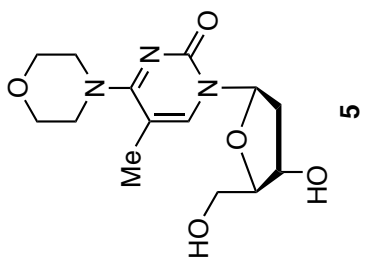

5

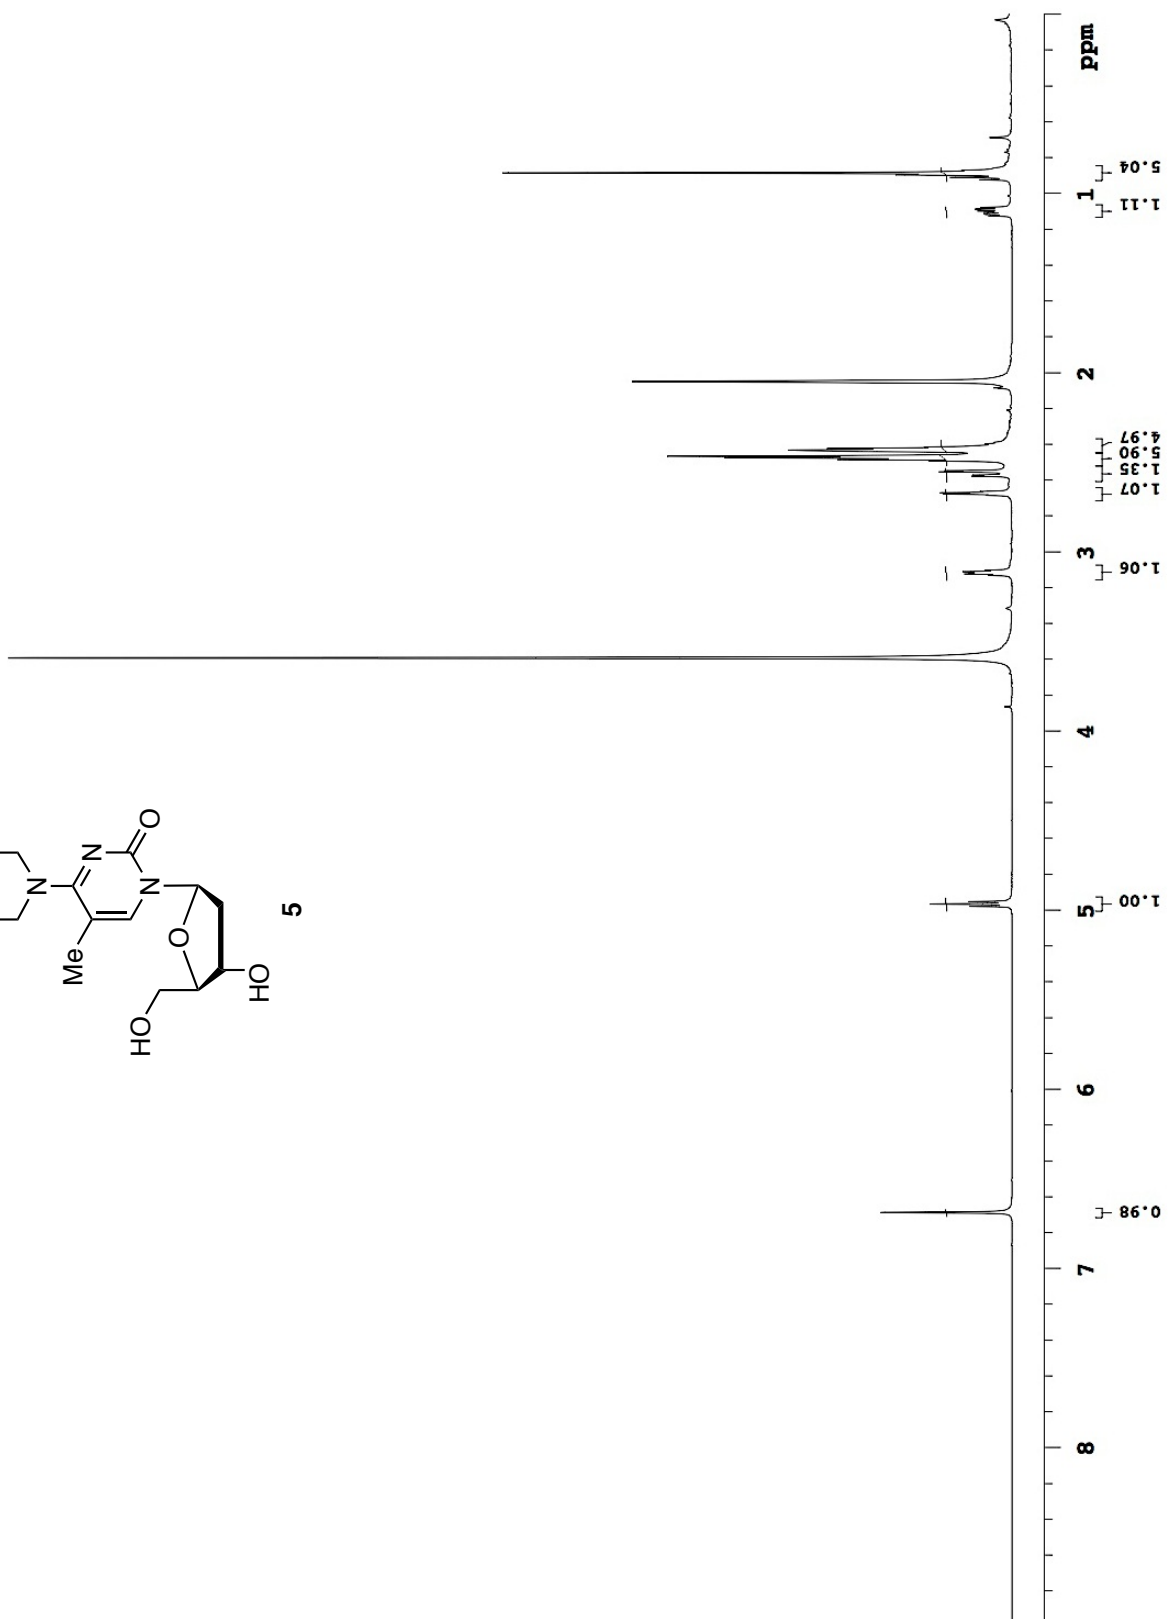

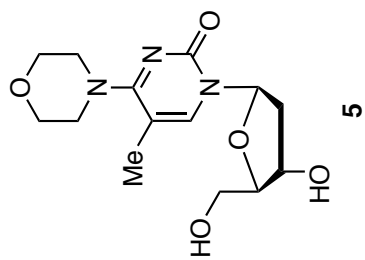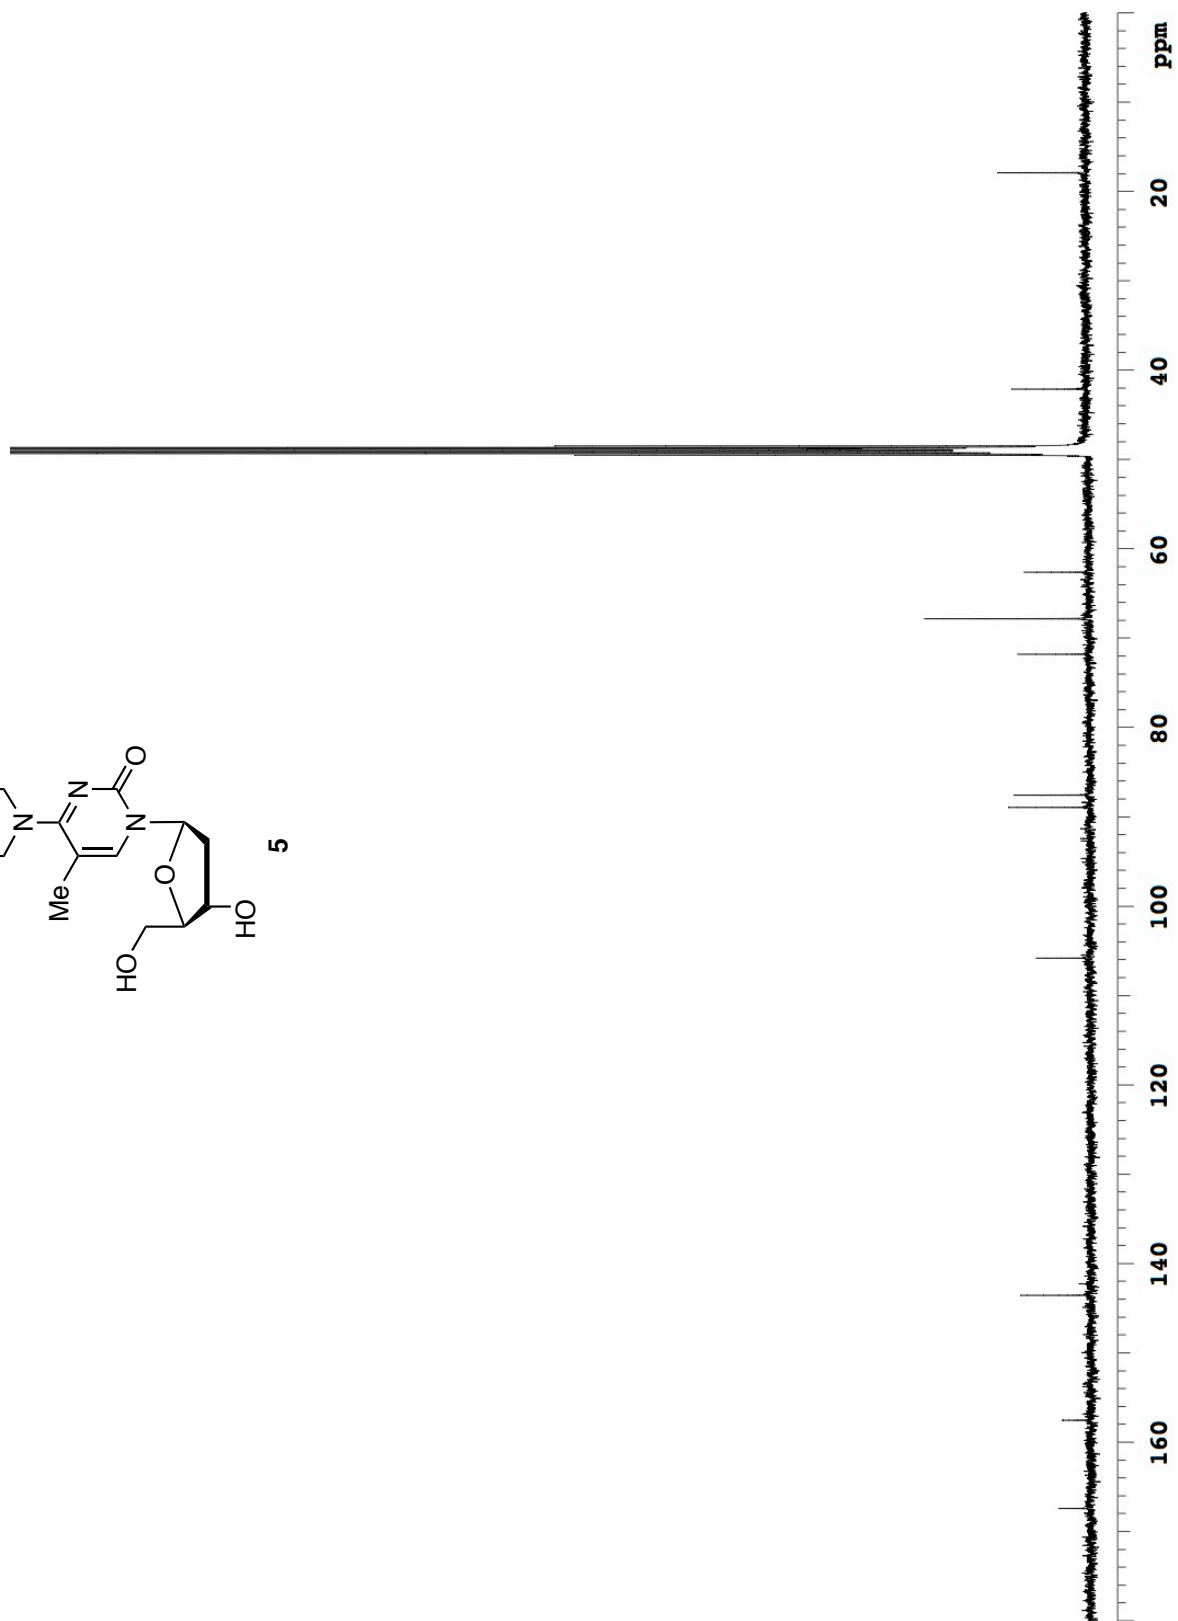

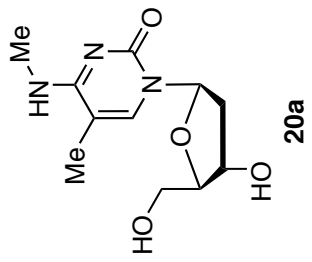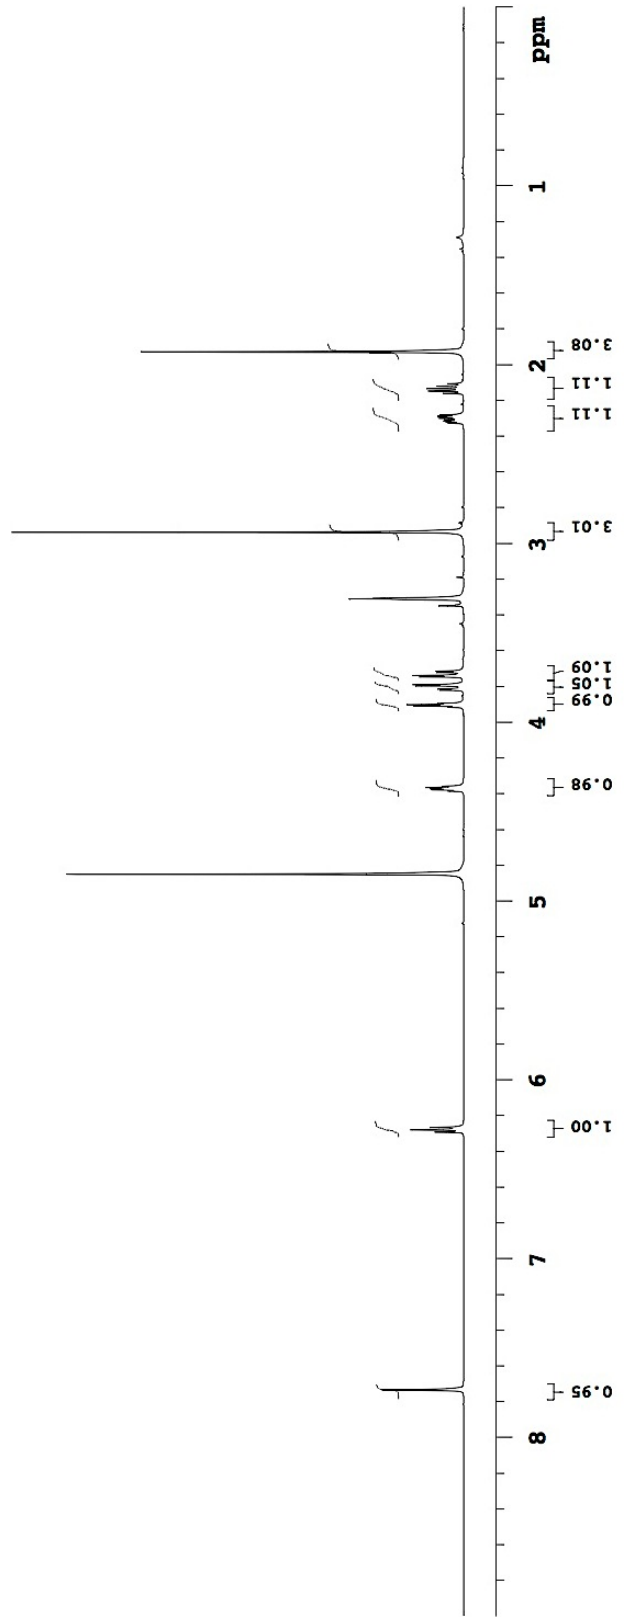



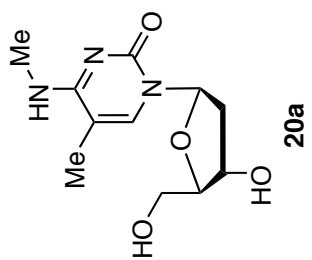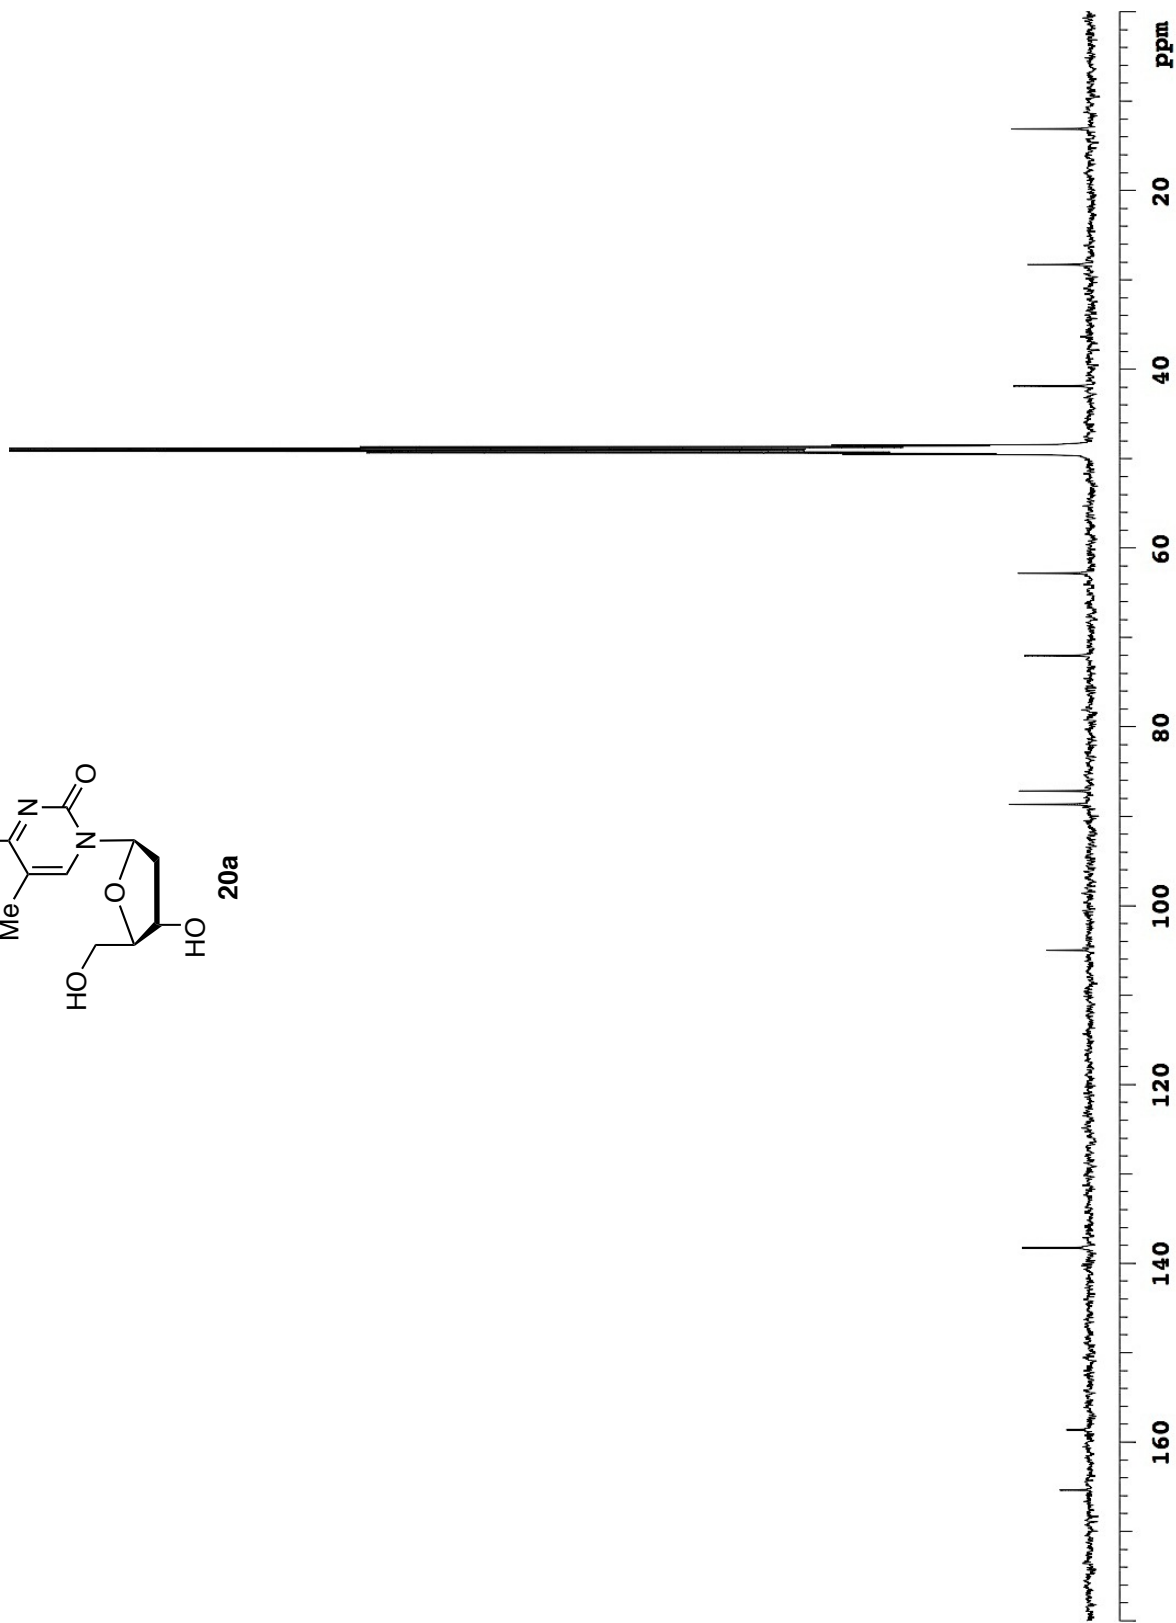

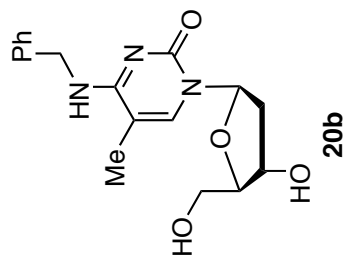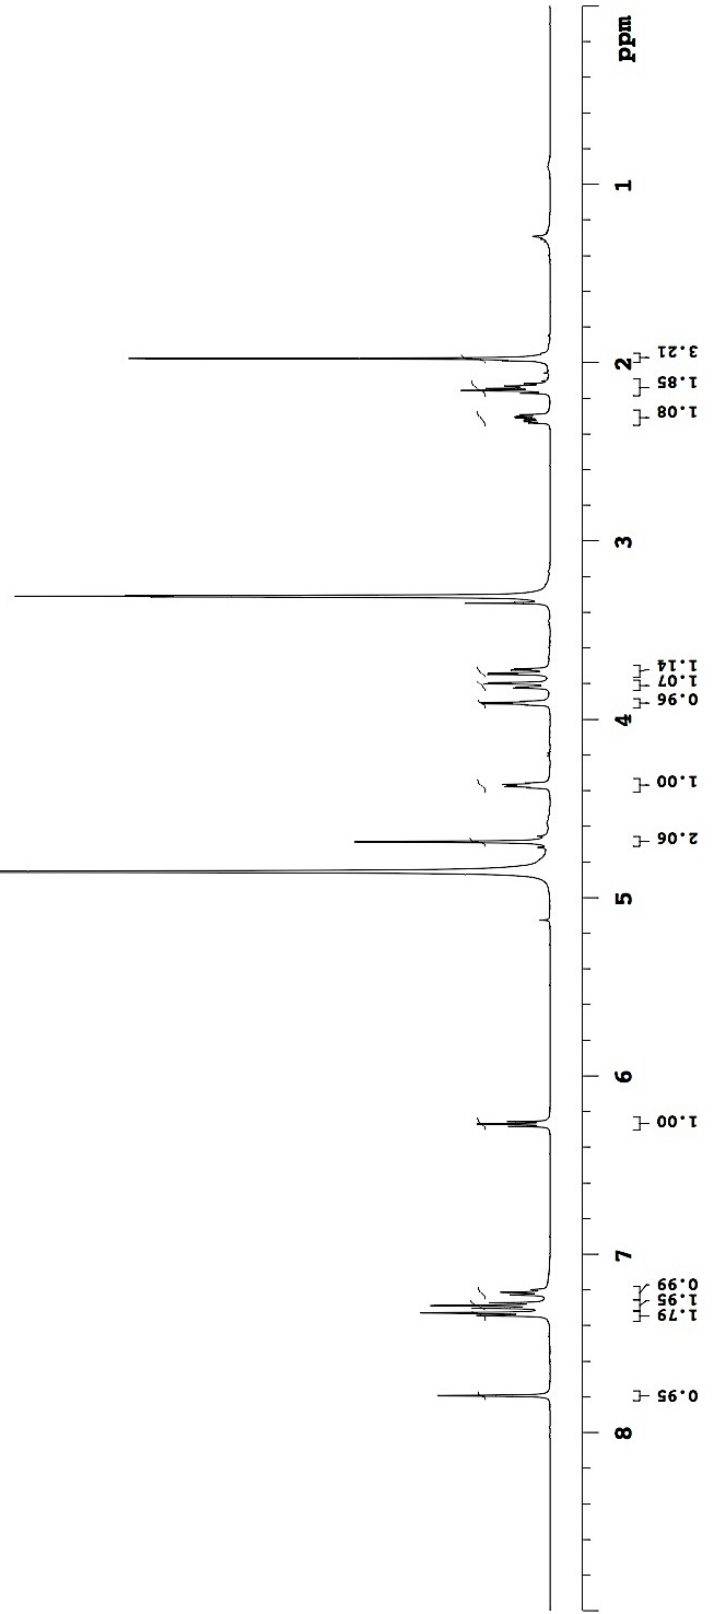

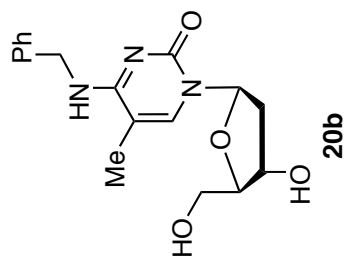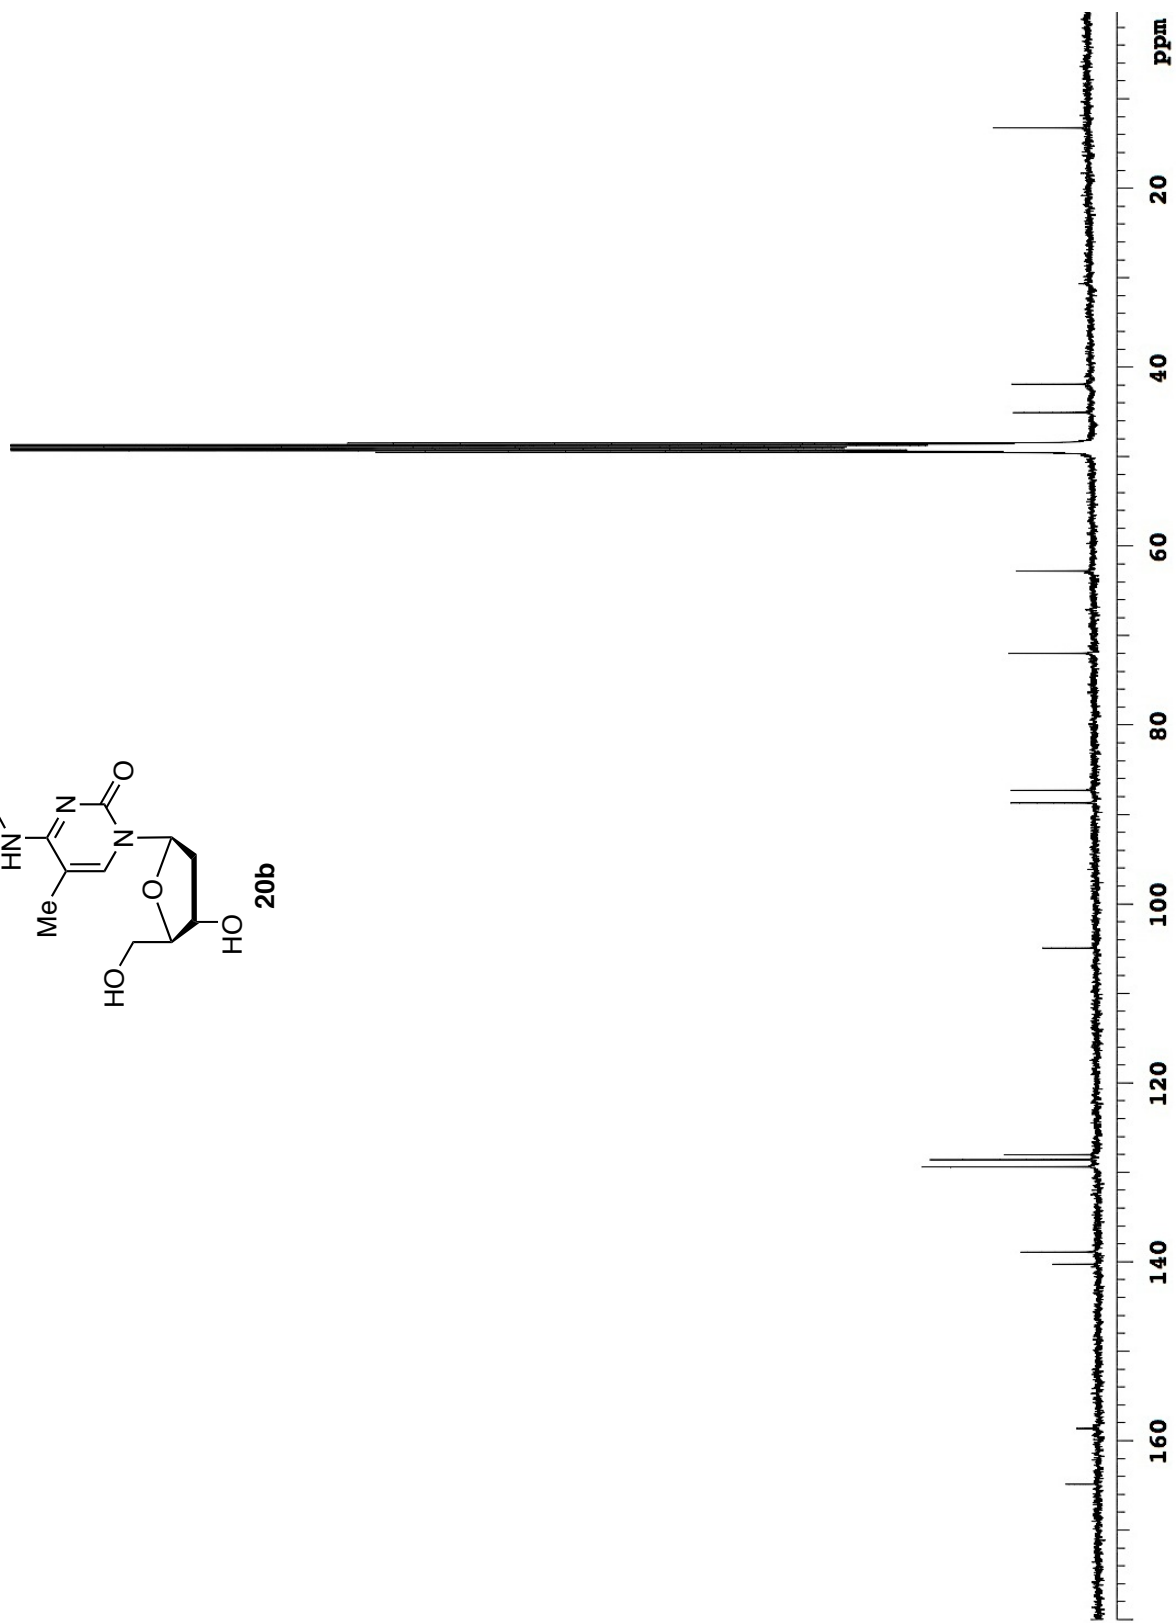

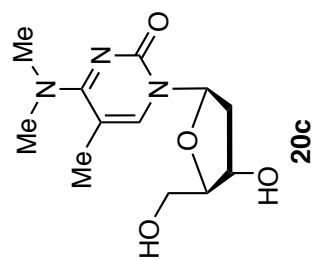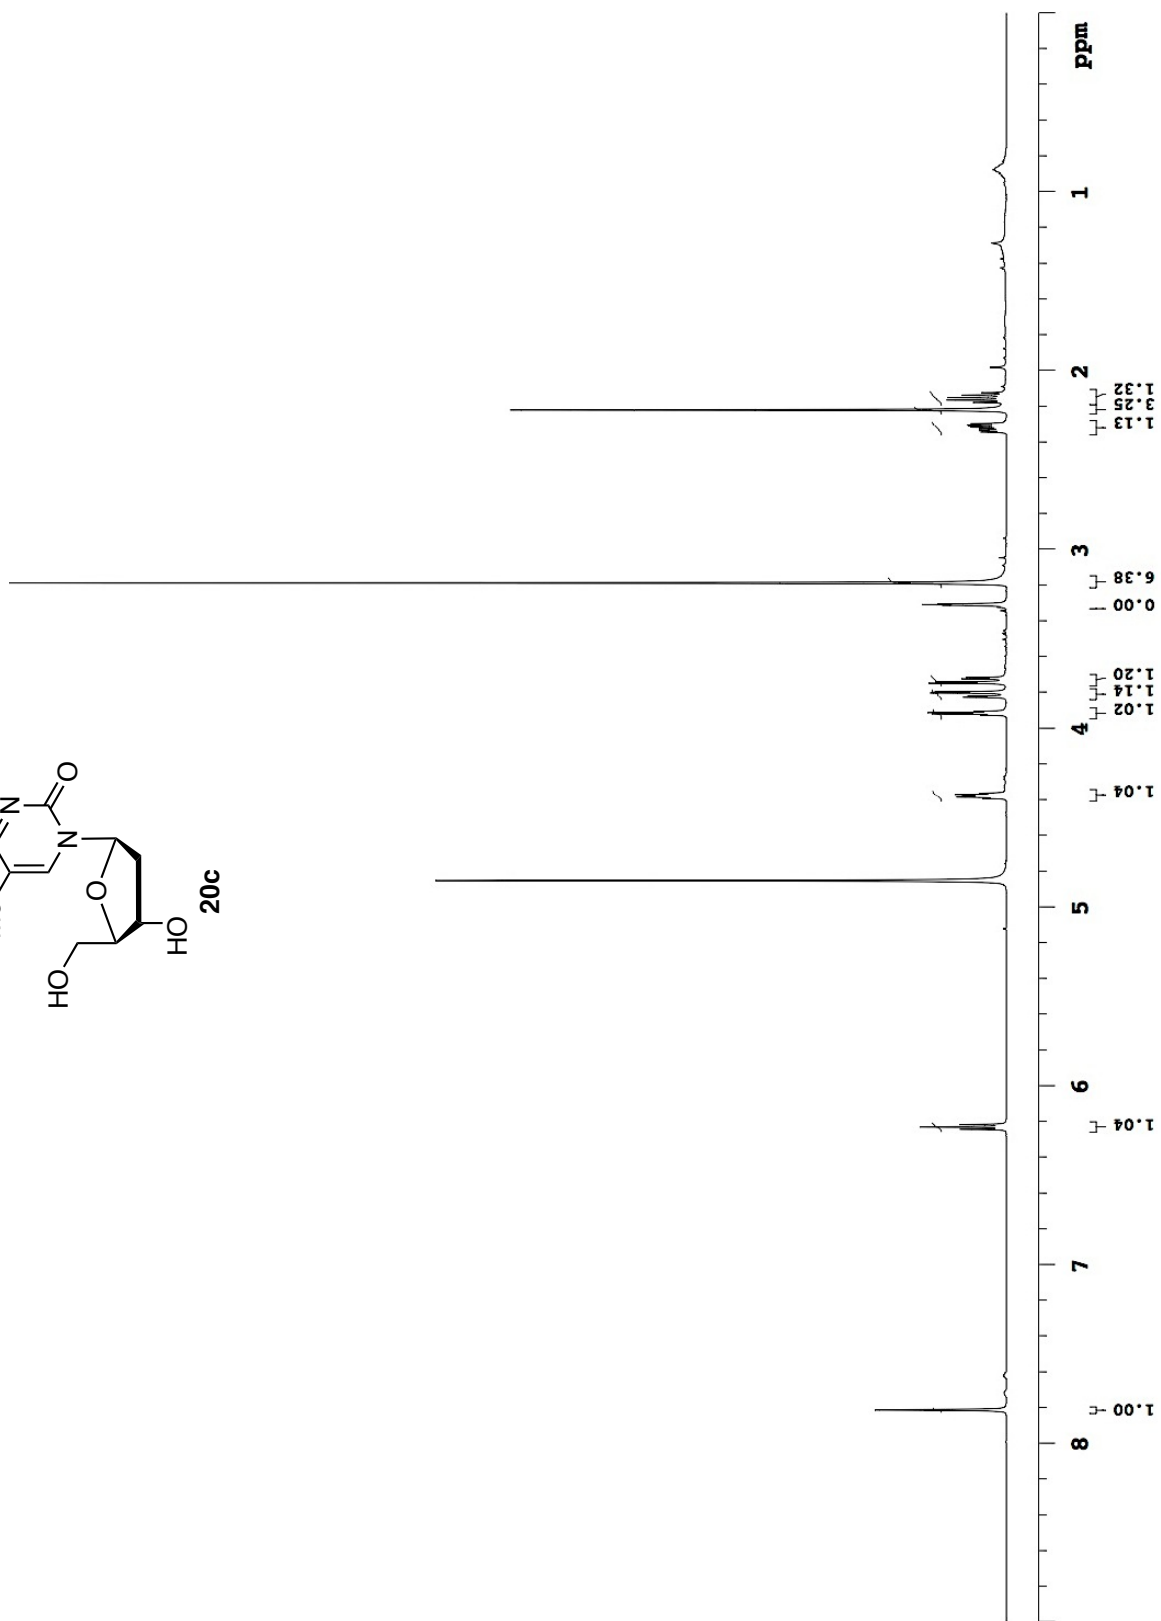

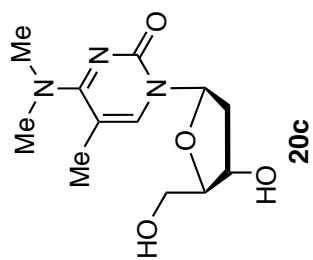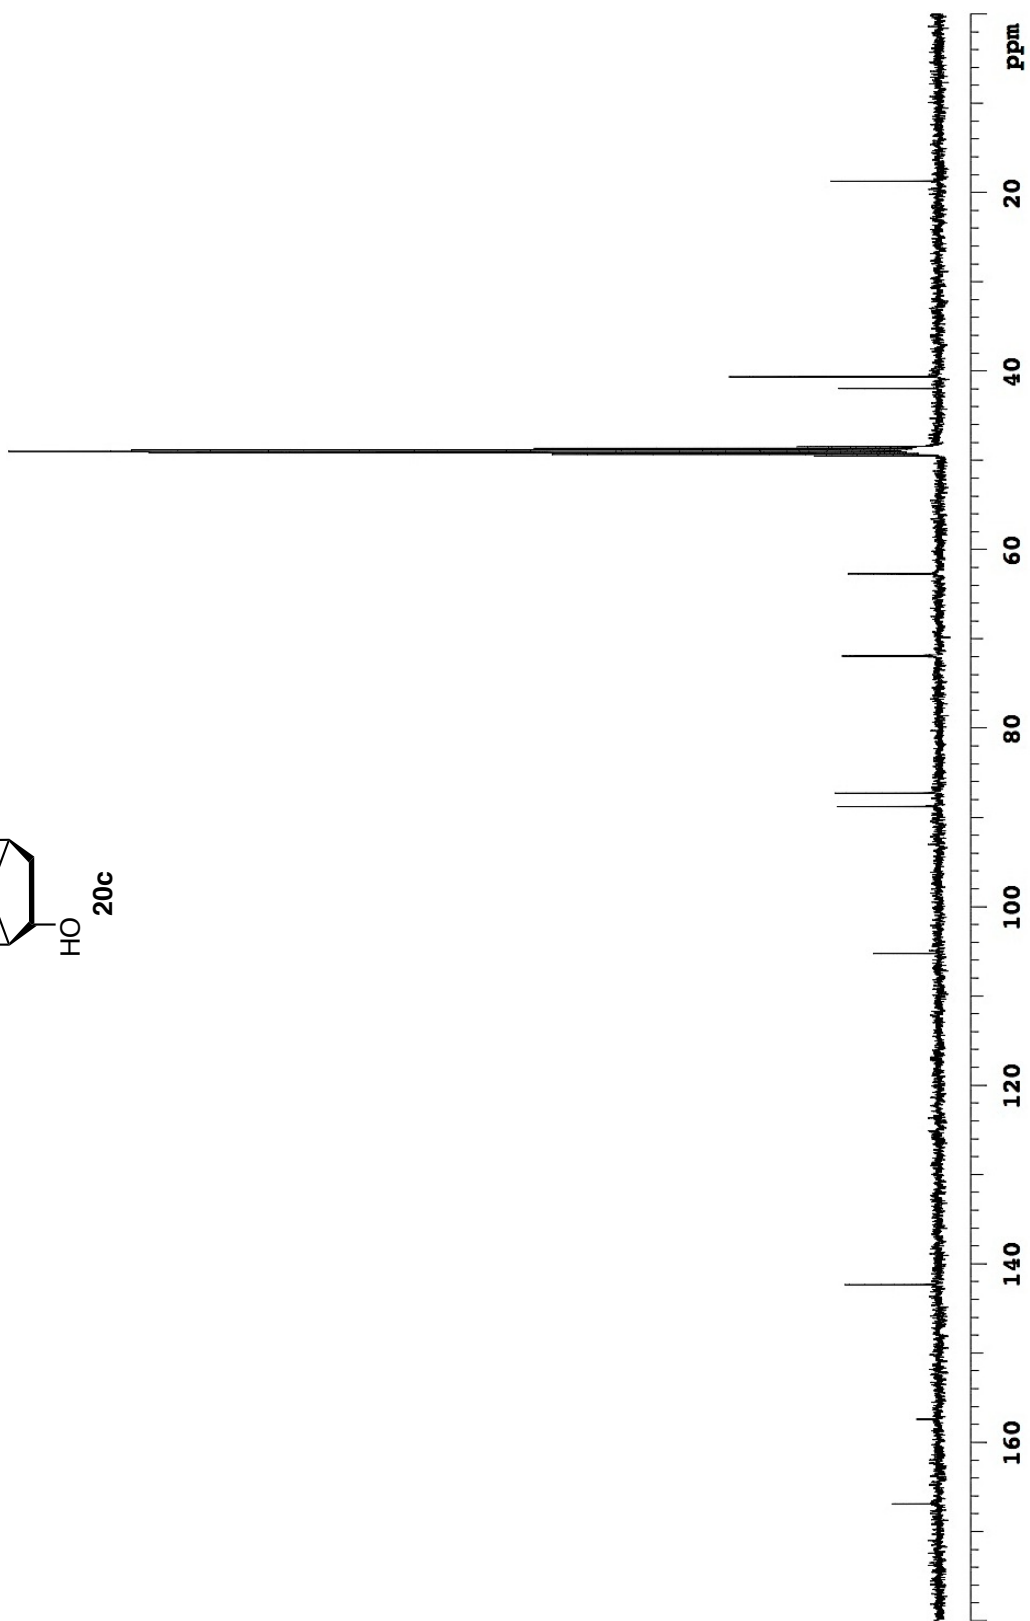

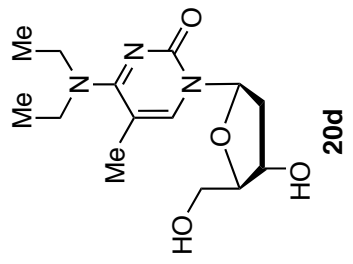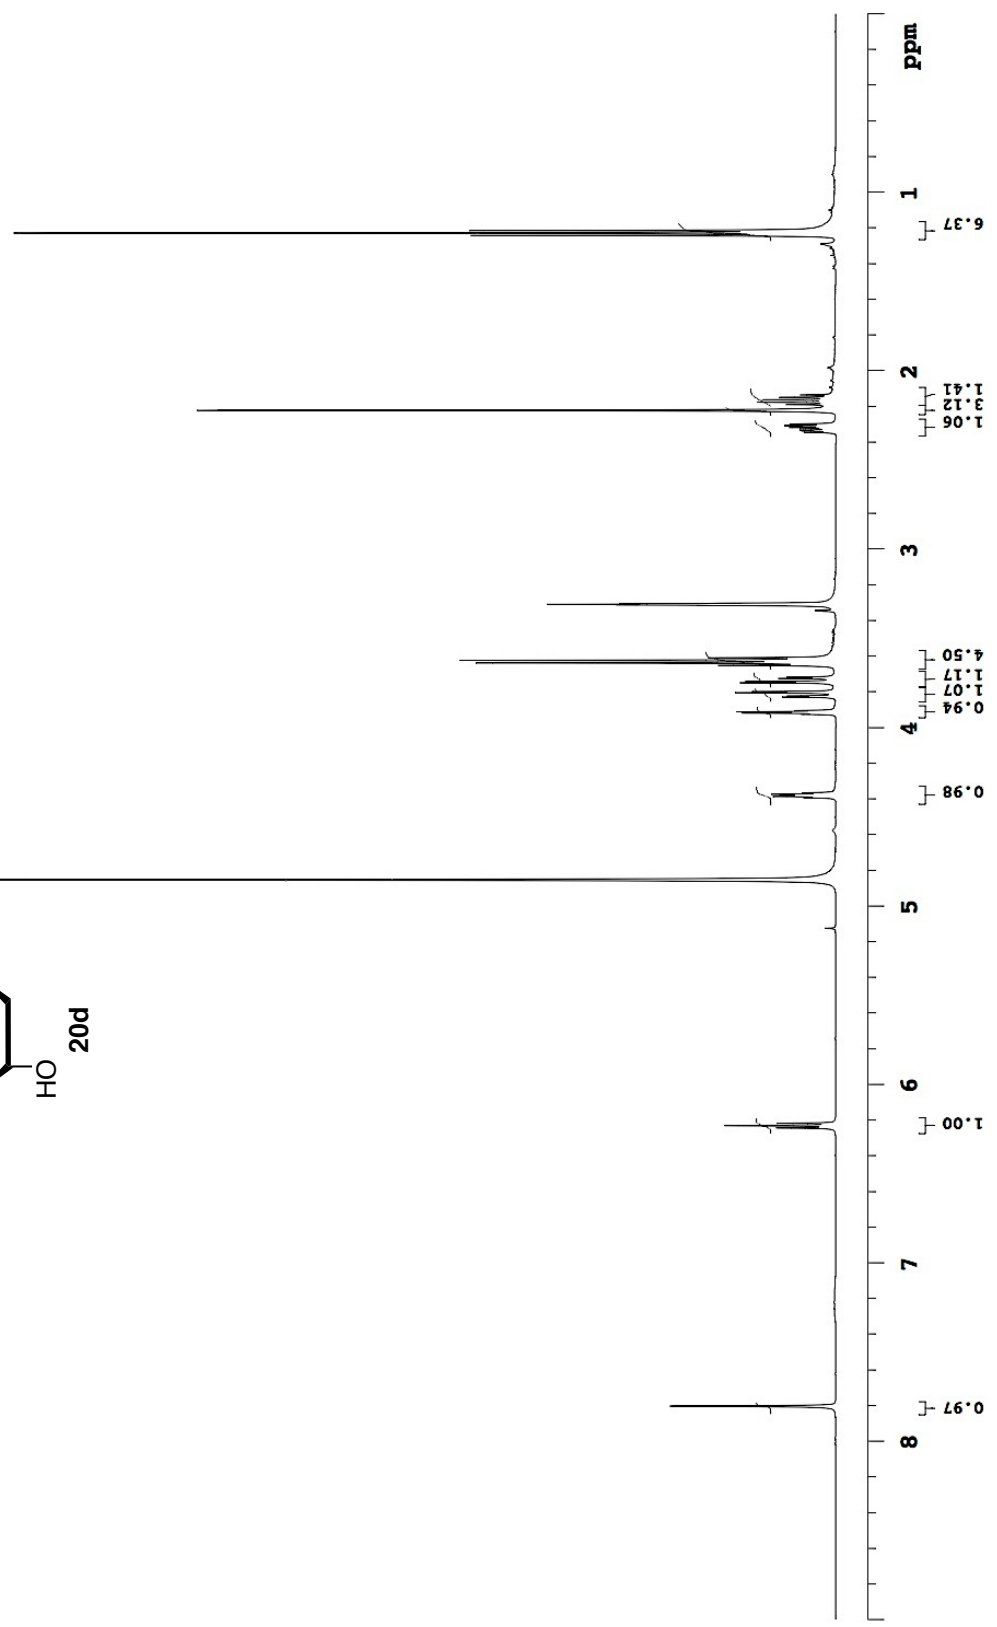

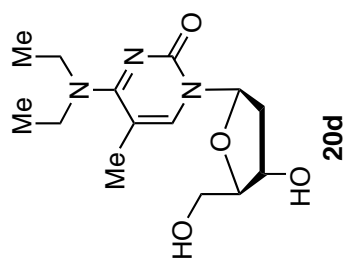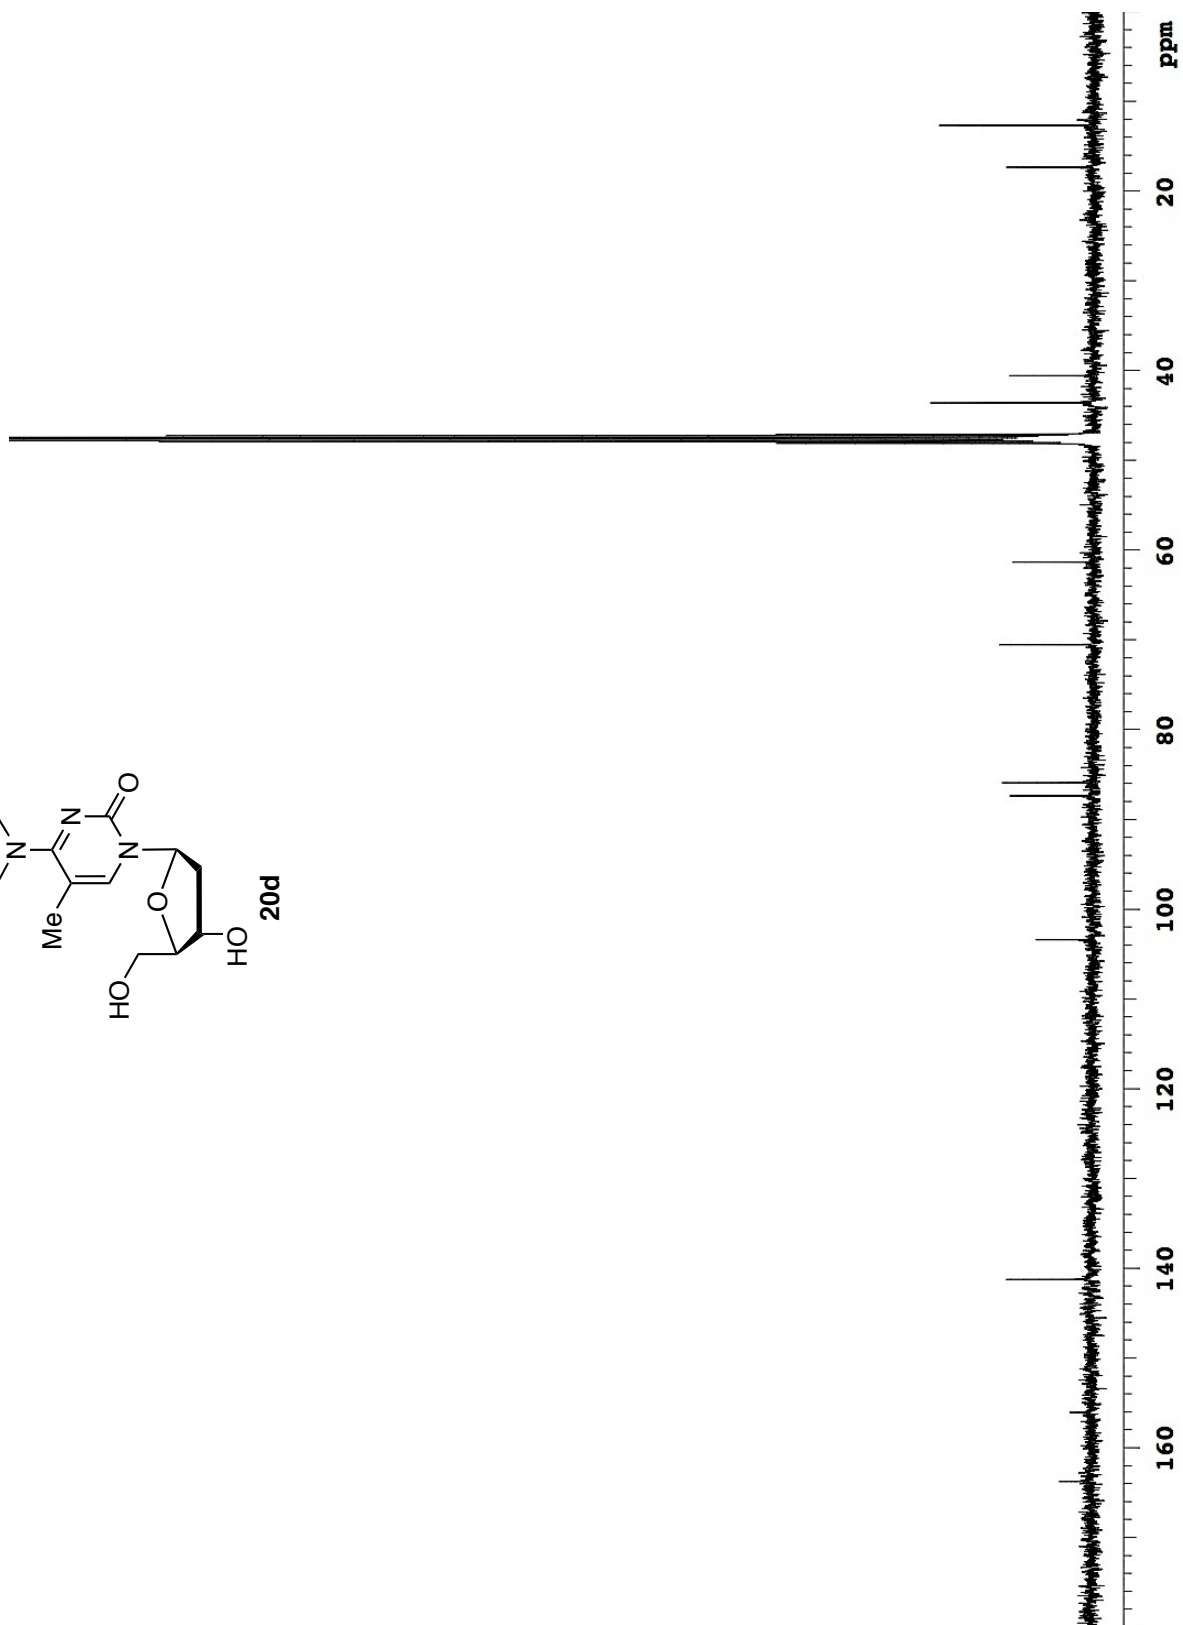

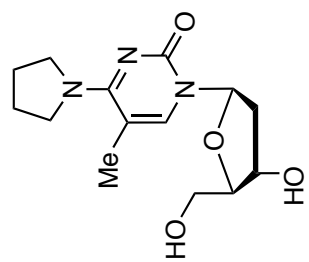

20e

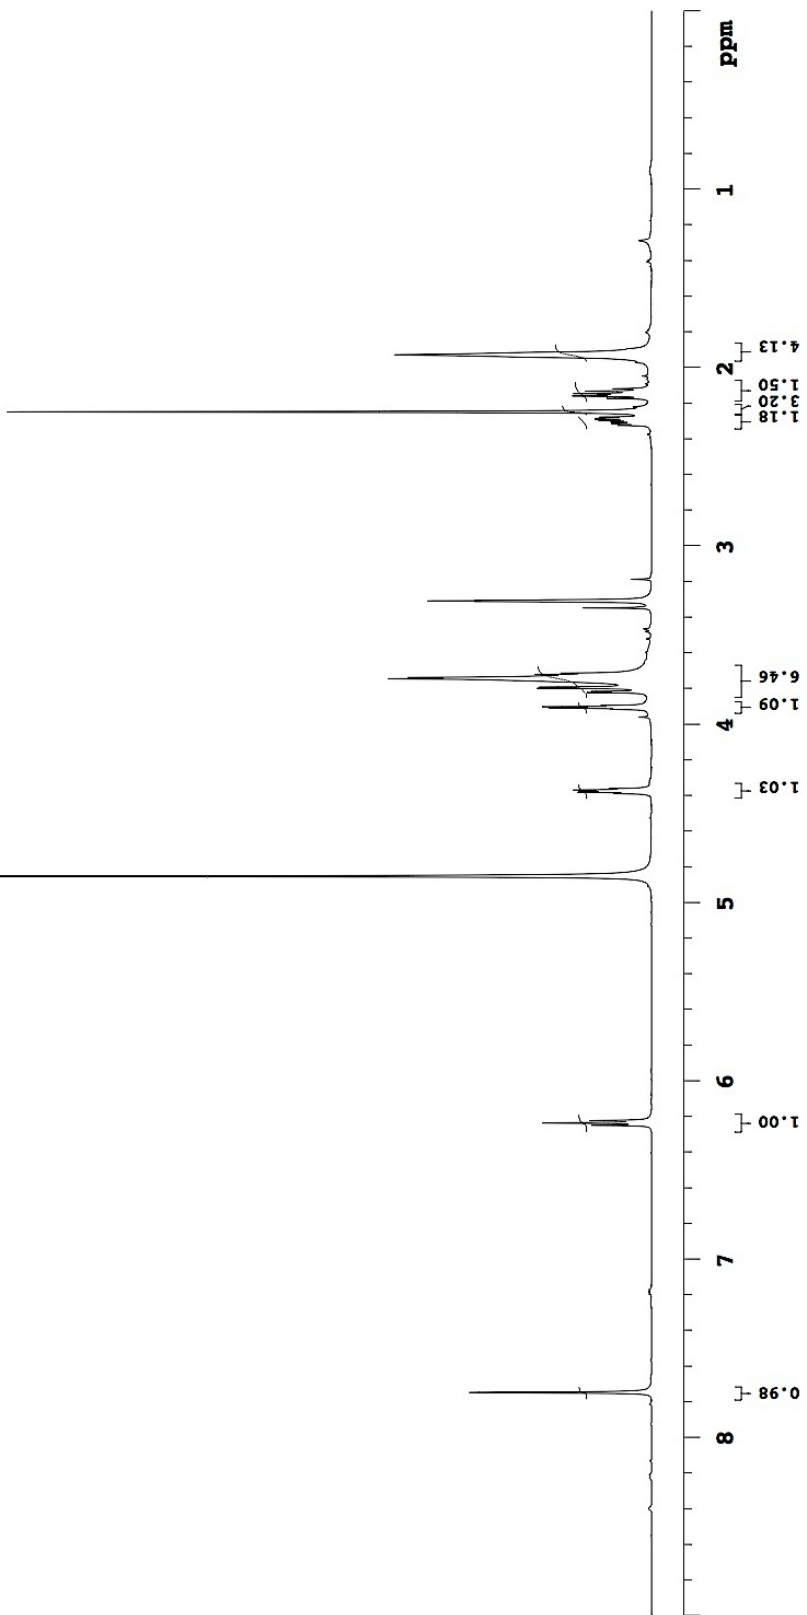



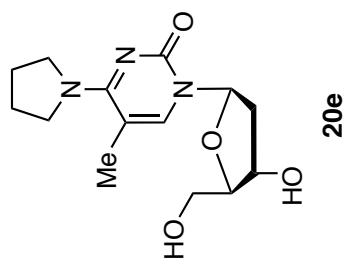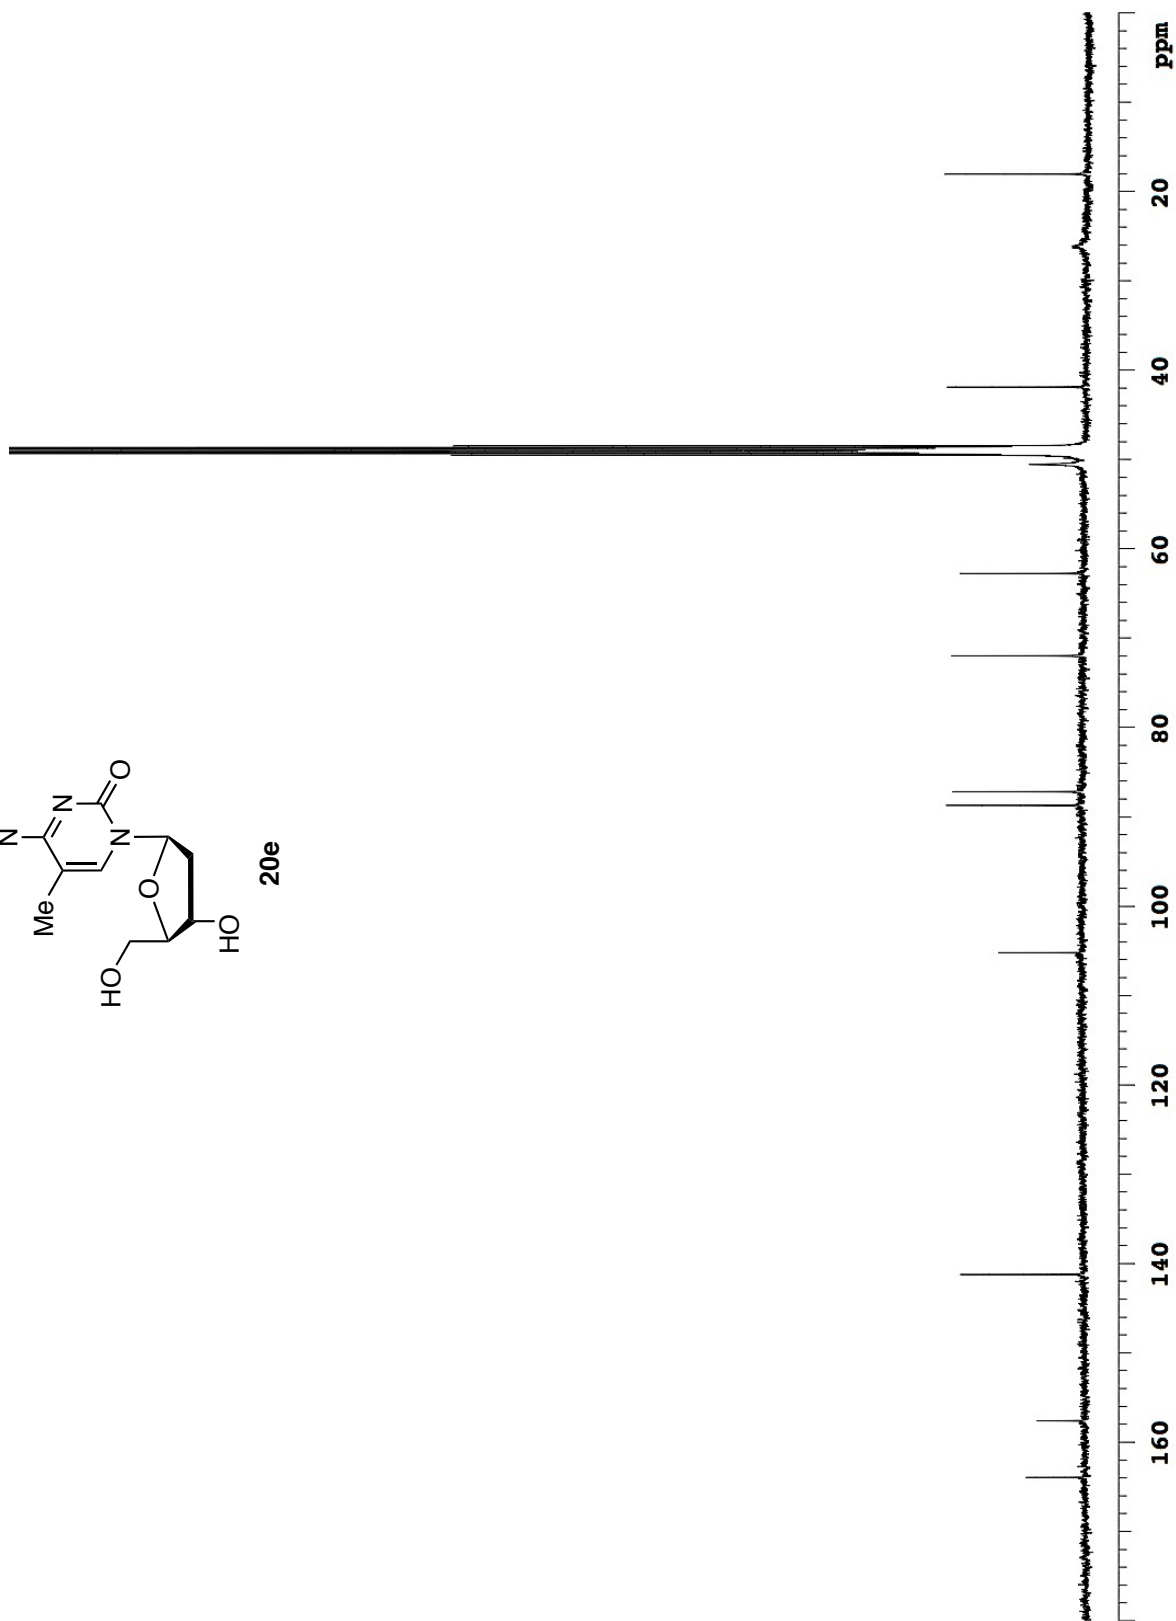

gCOSY spectrum of compound **20e** in CD<sub>3</sub>OD

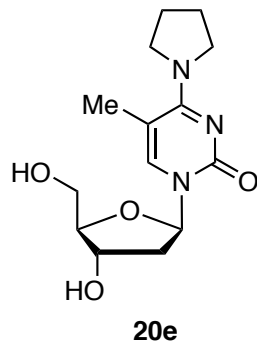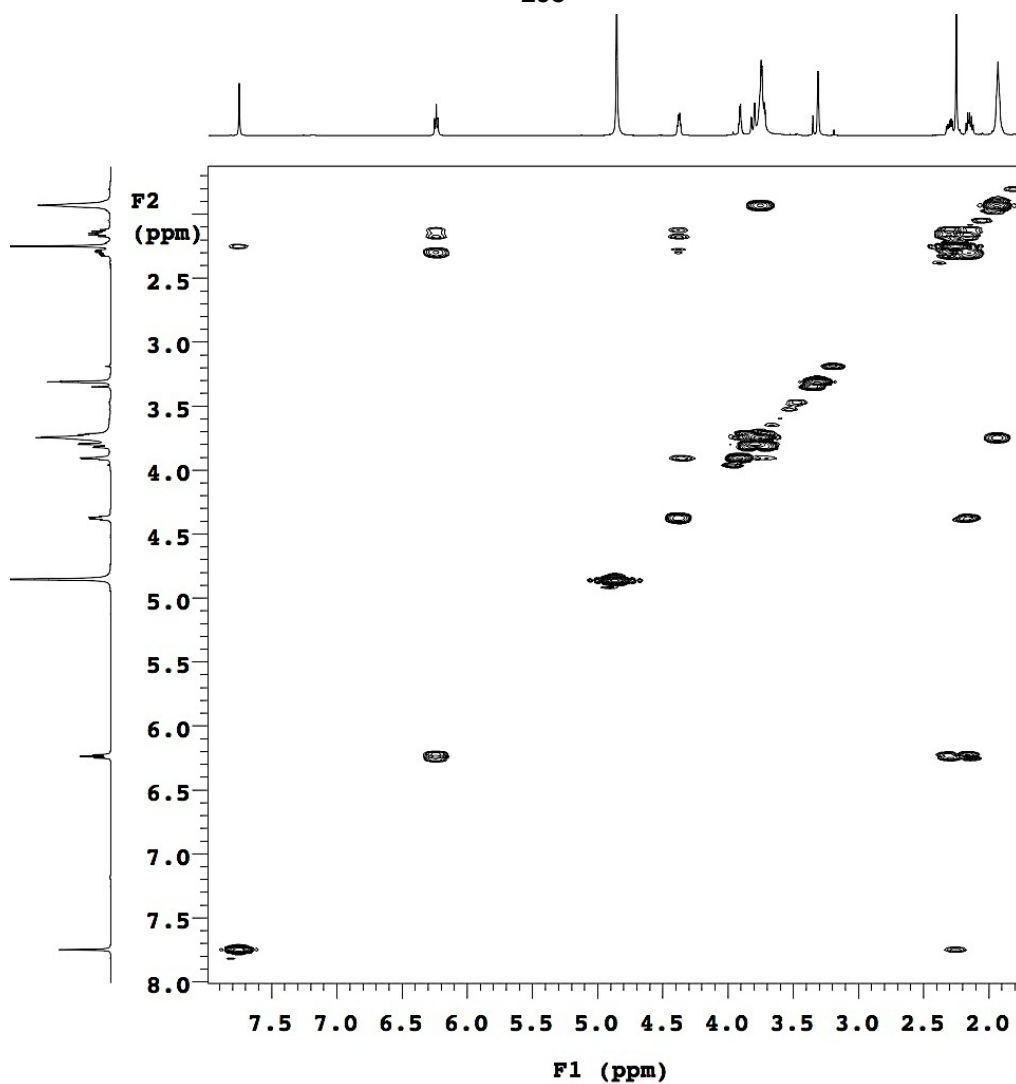

gHMQC spectrum of compound **20e** in CD<sub>3</sub>OD

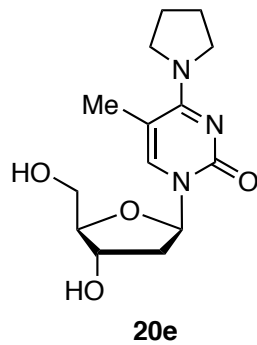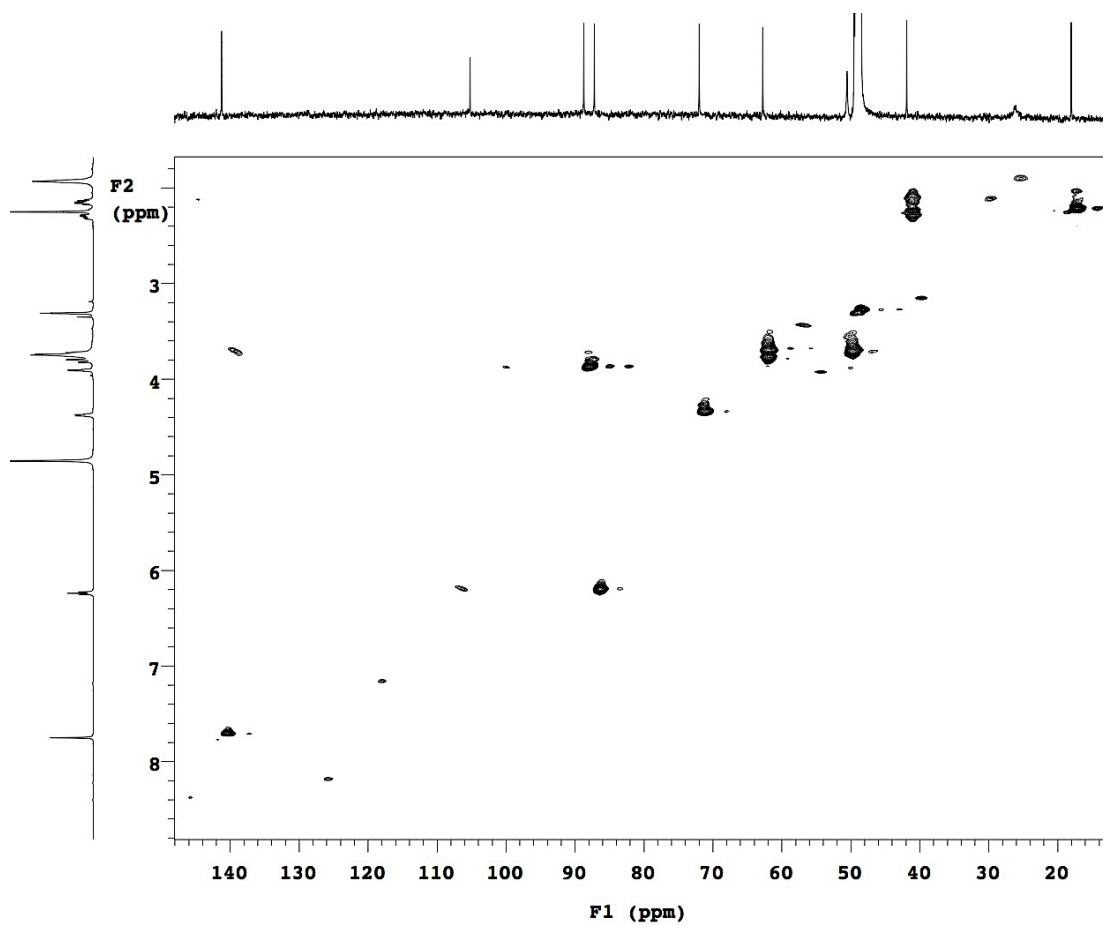

gHMQC spectrum of compound **20e** in CD<sub>3</sub>OD

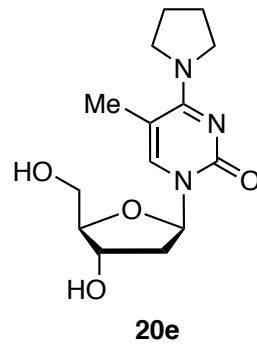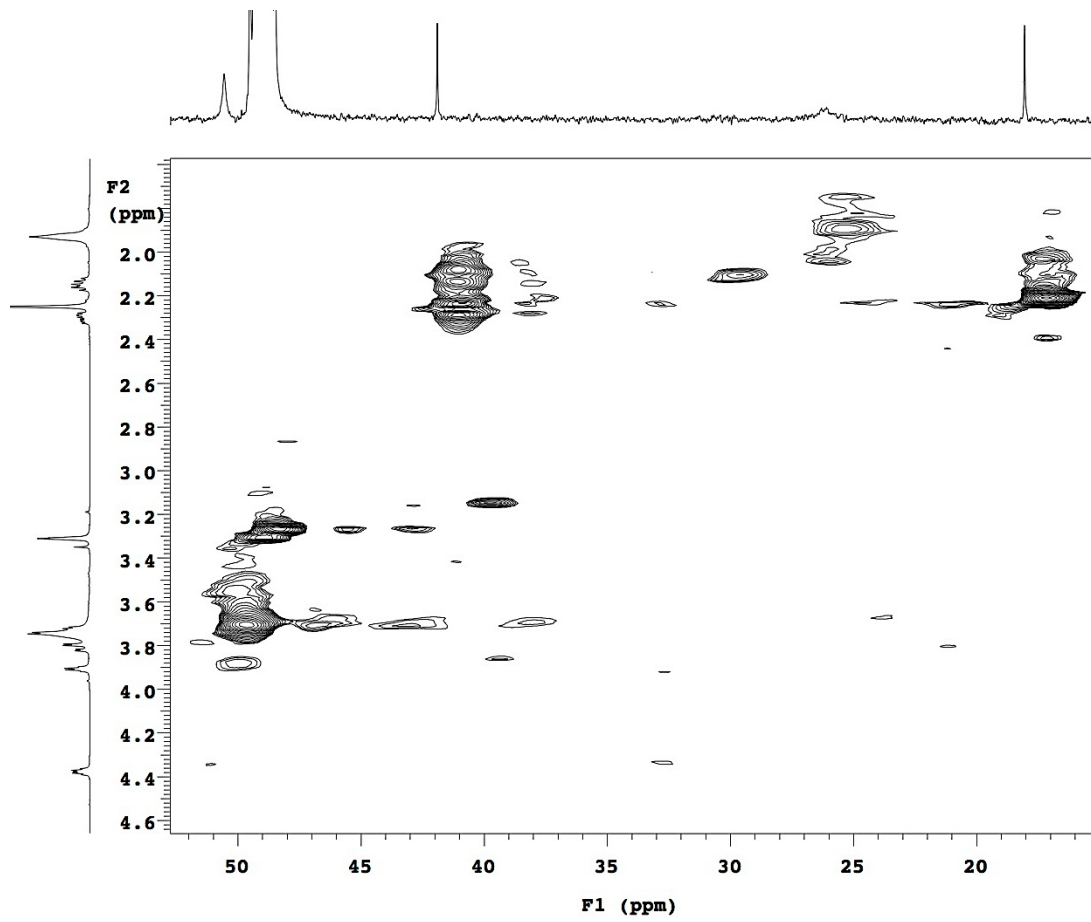

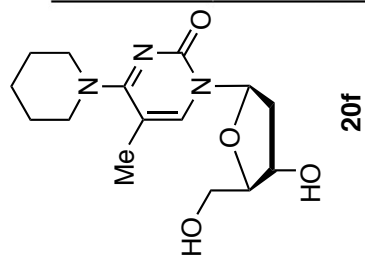

20f

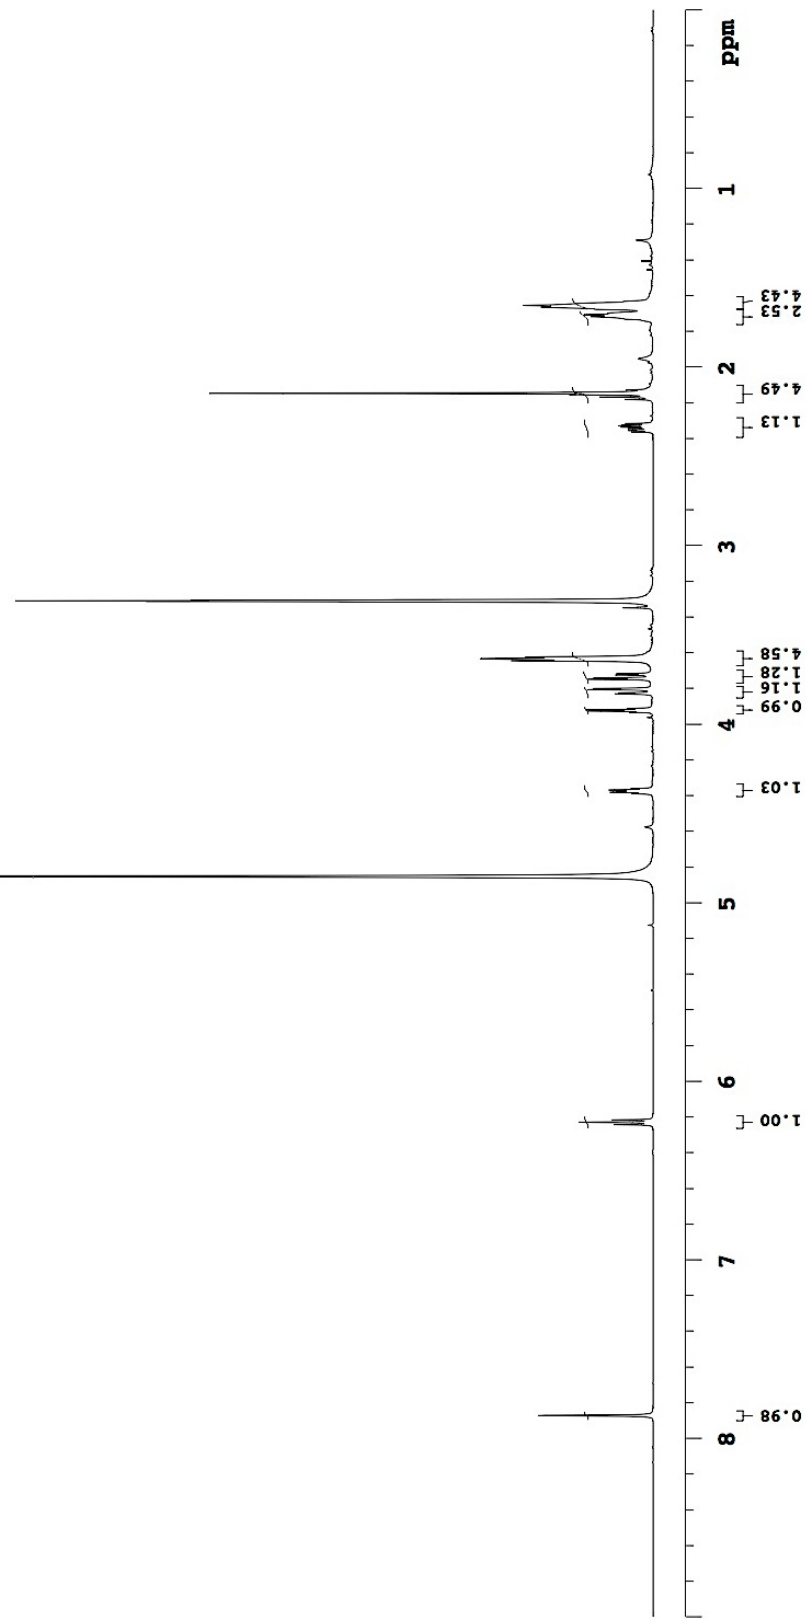

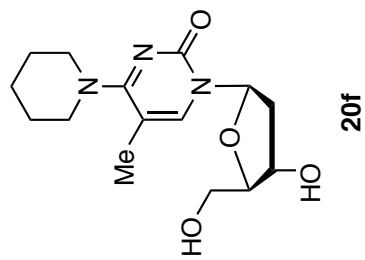

20f

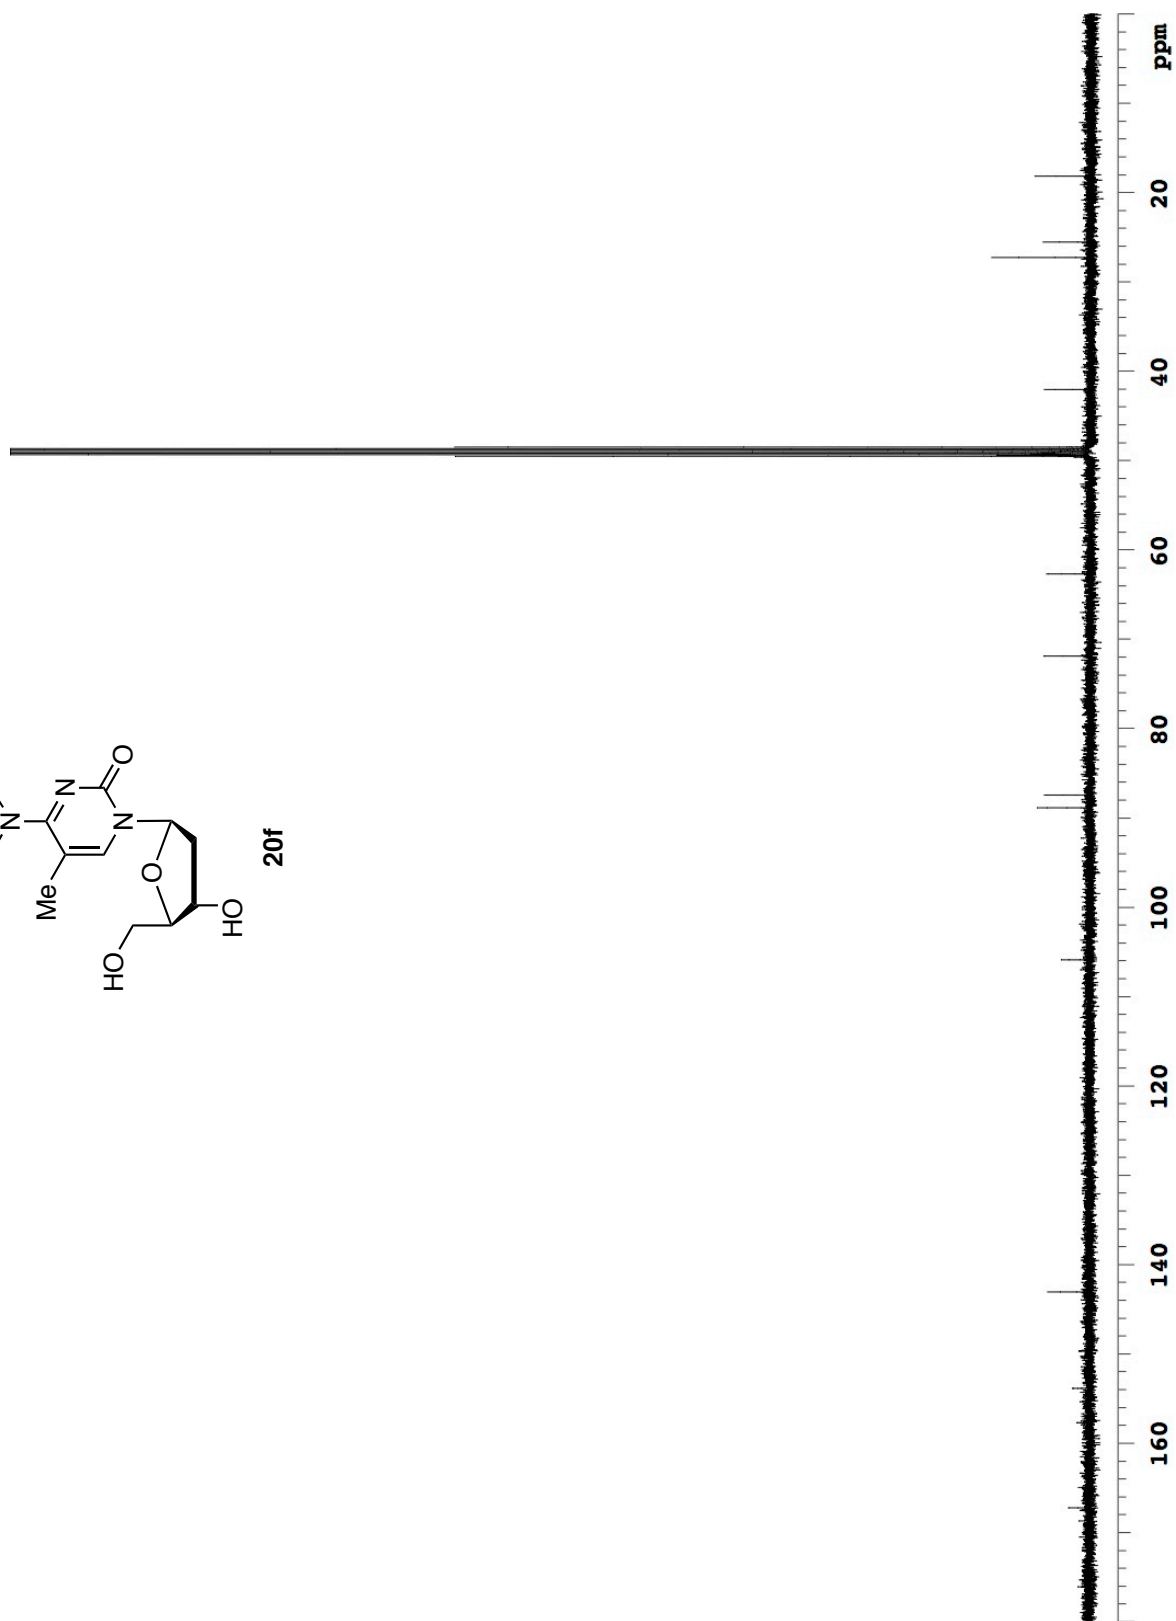

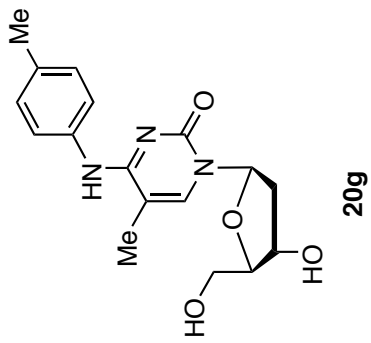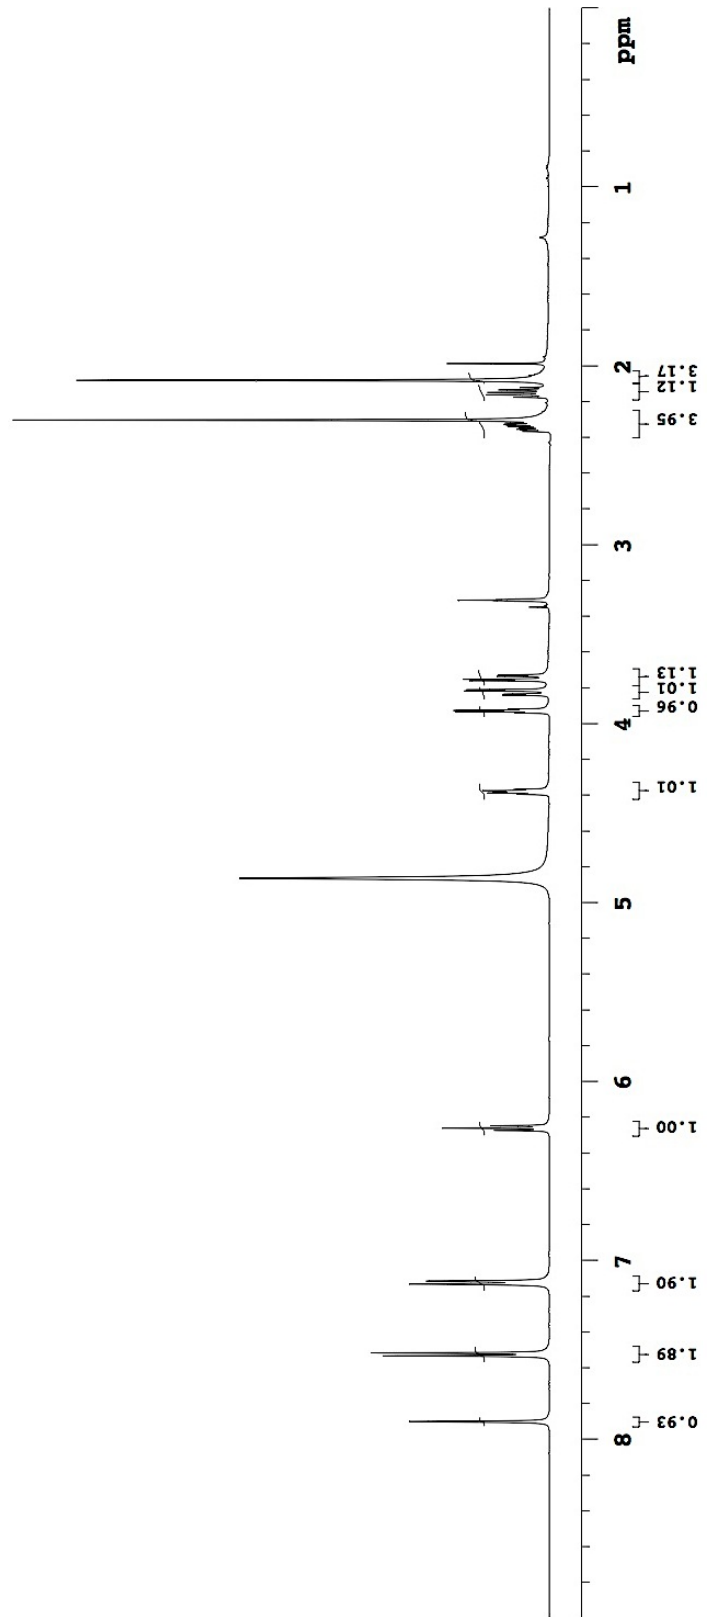

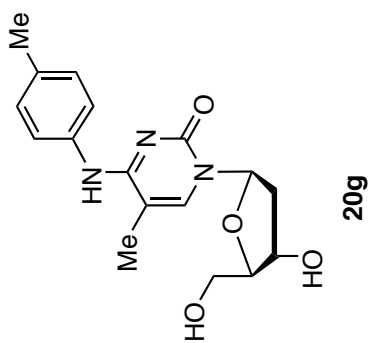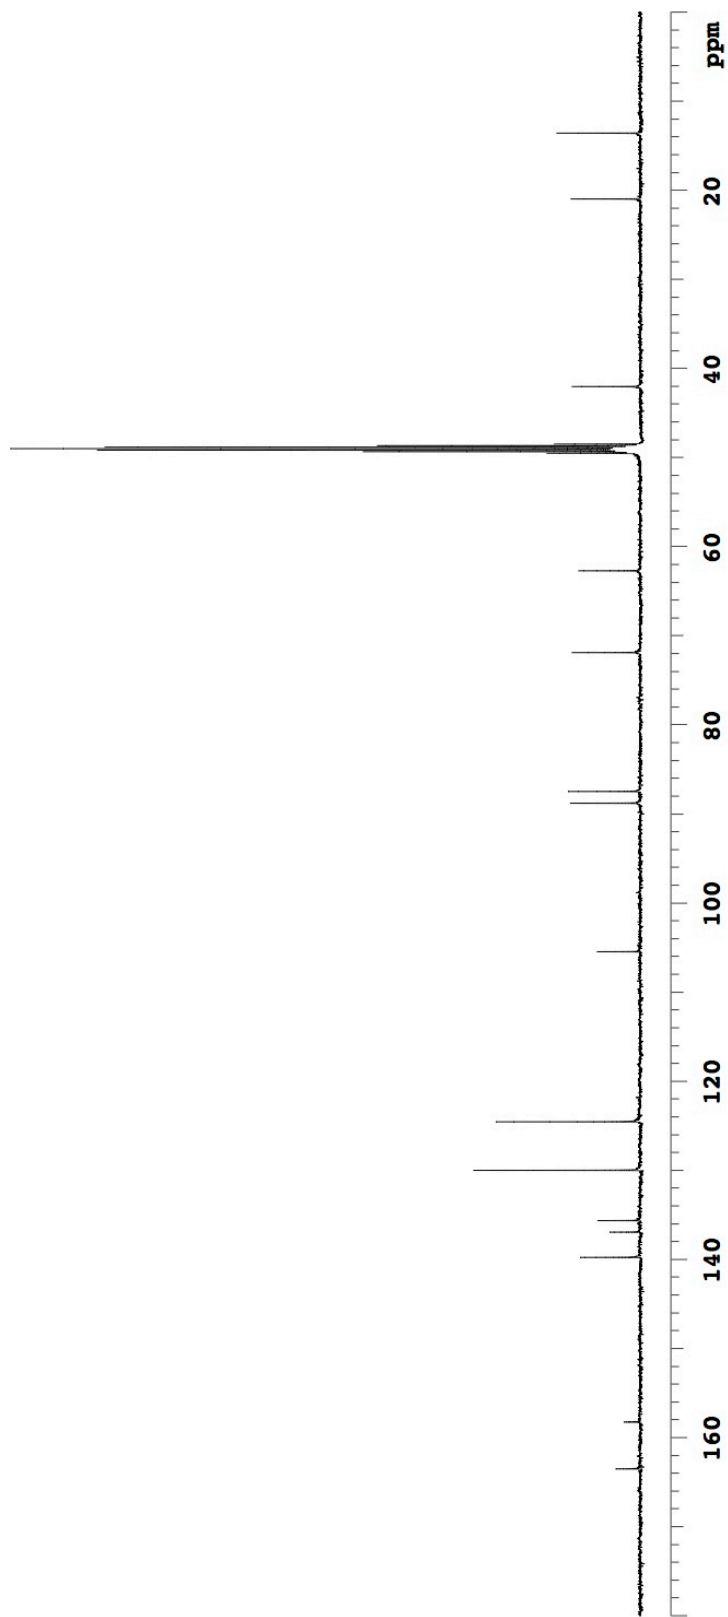



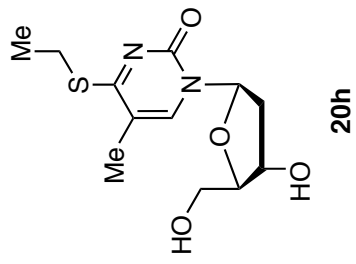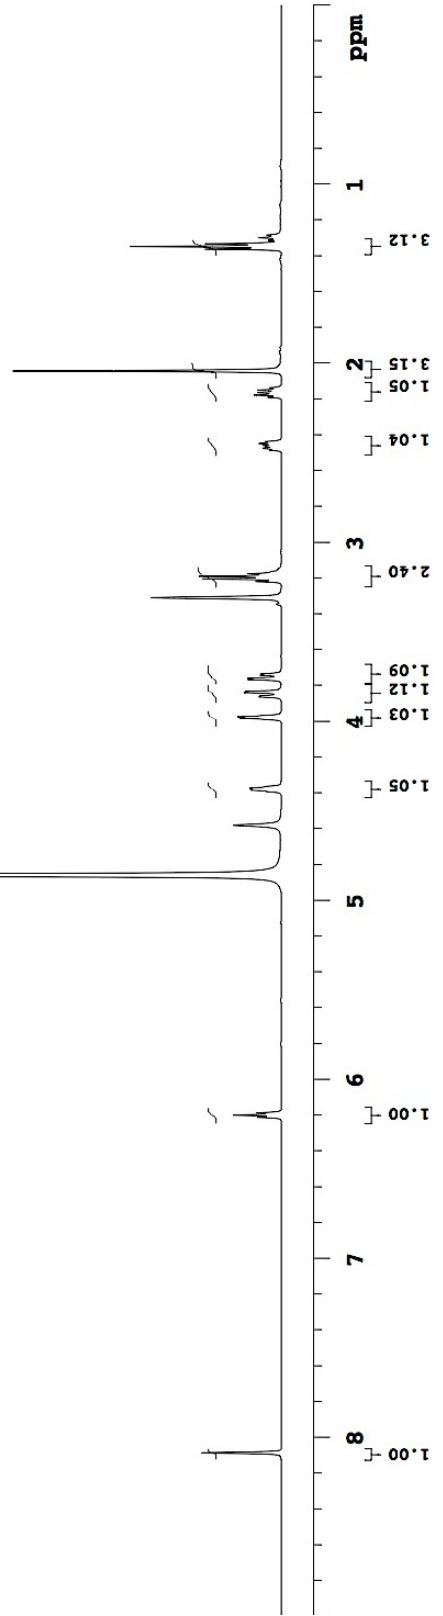

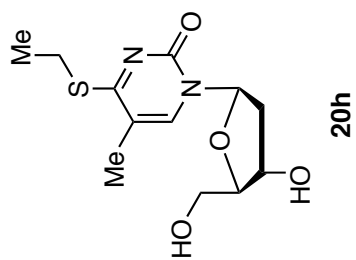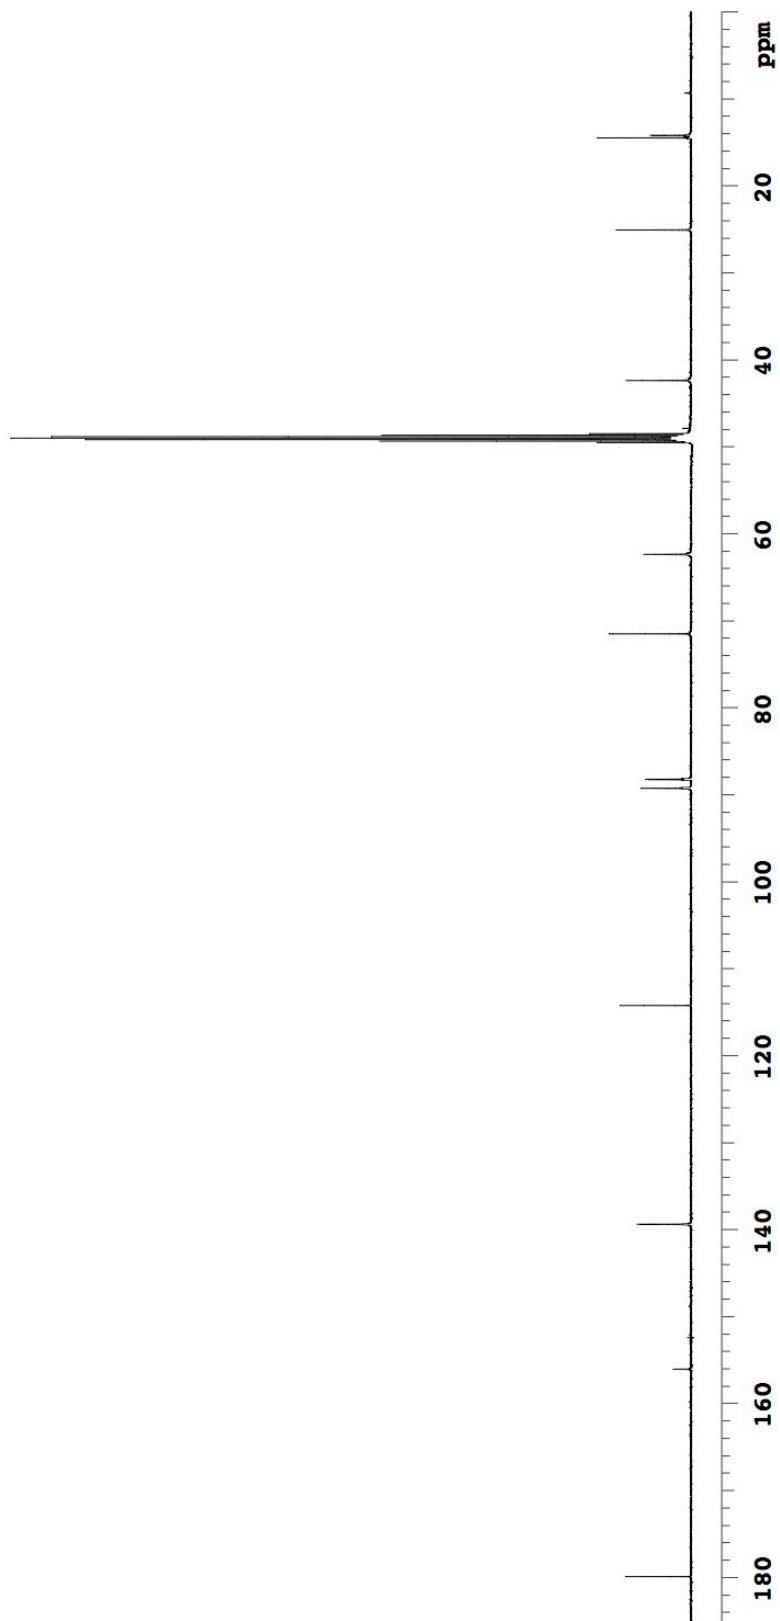

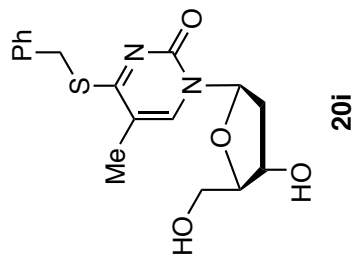

20i

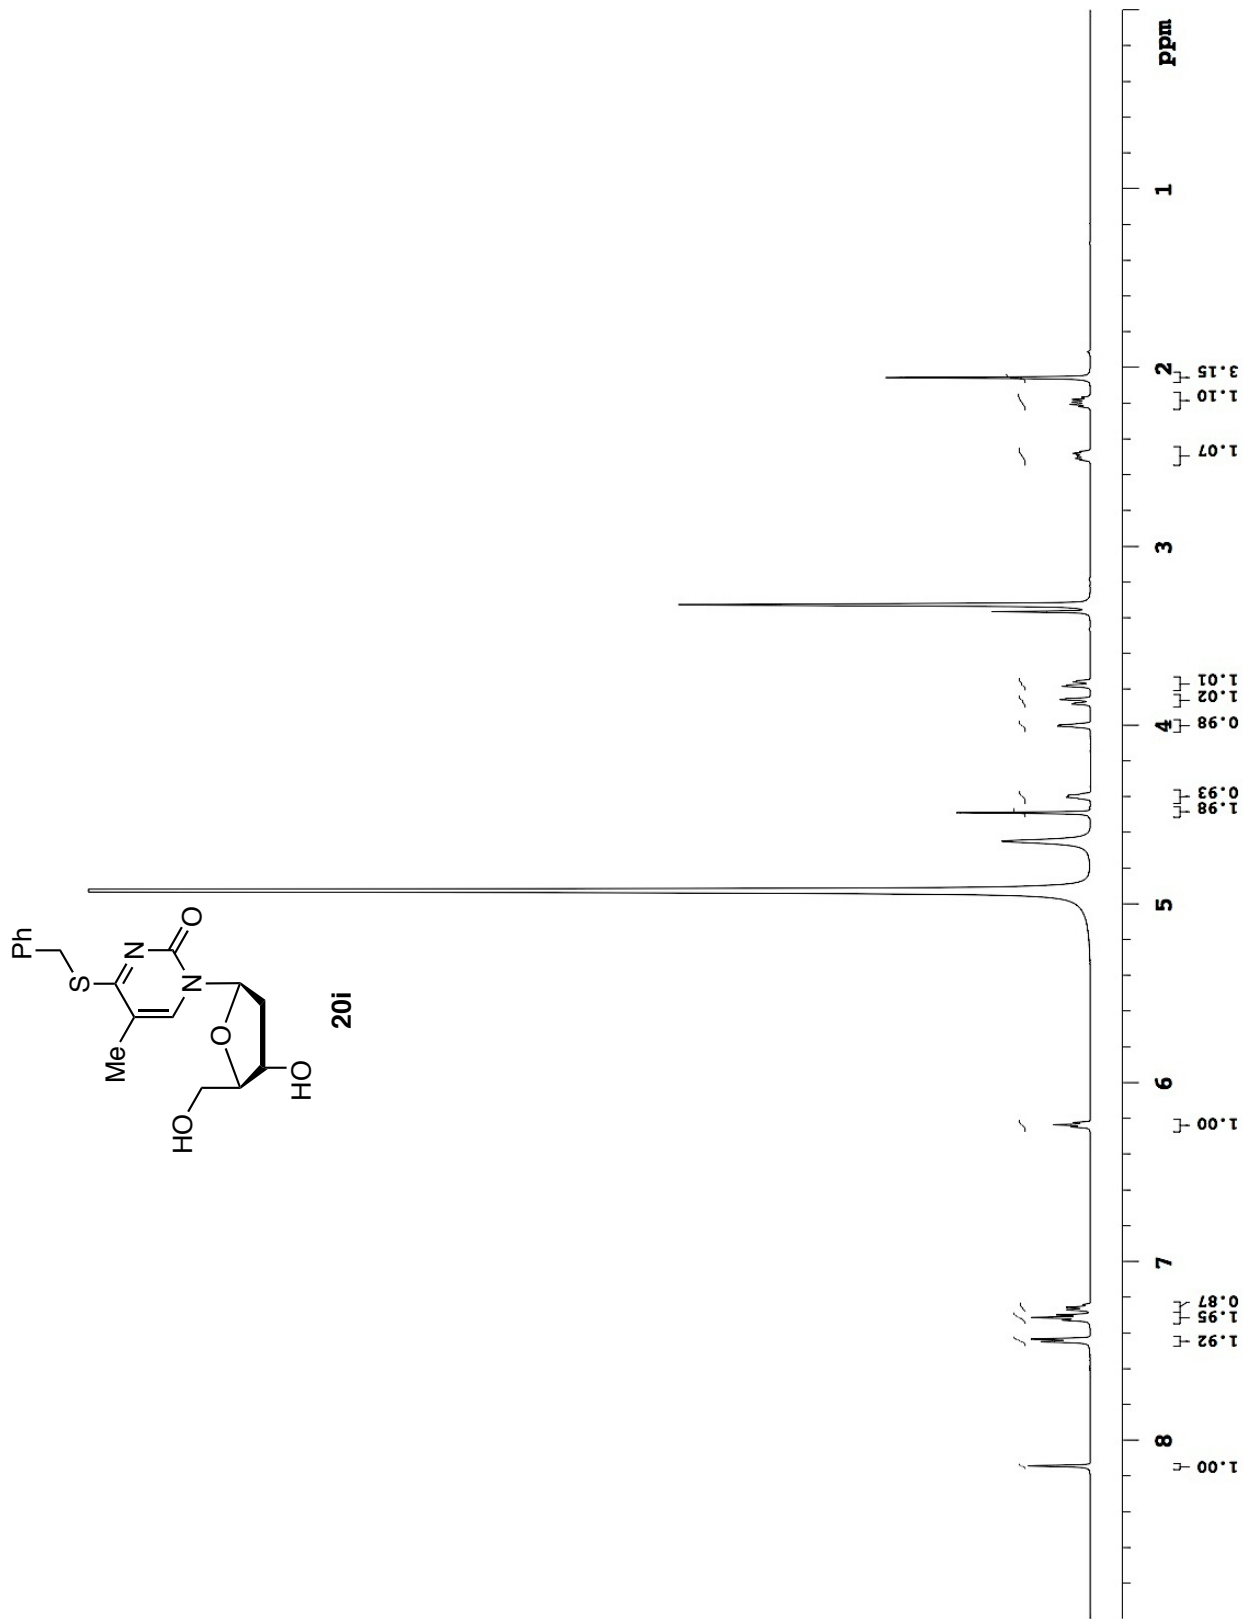

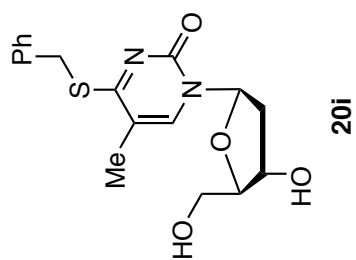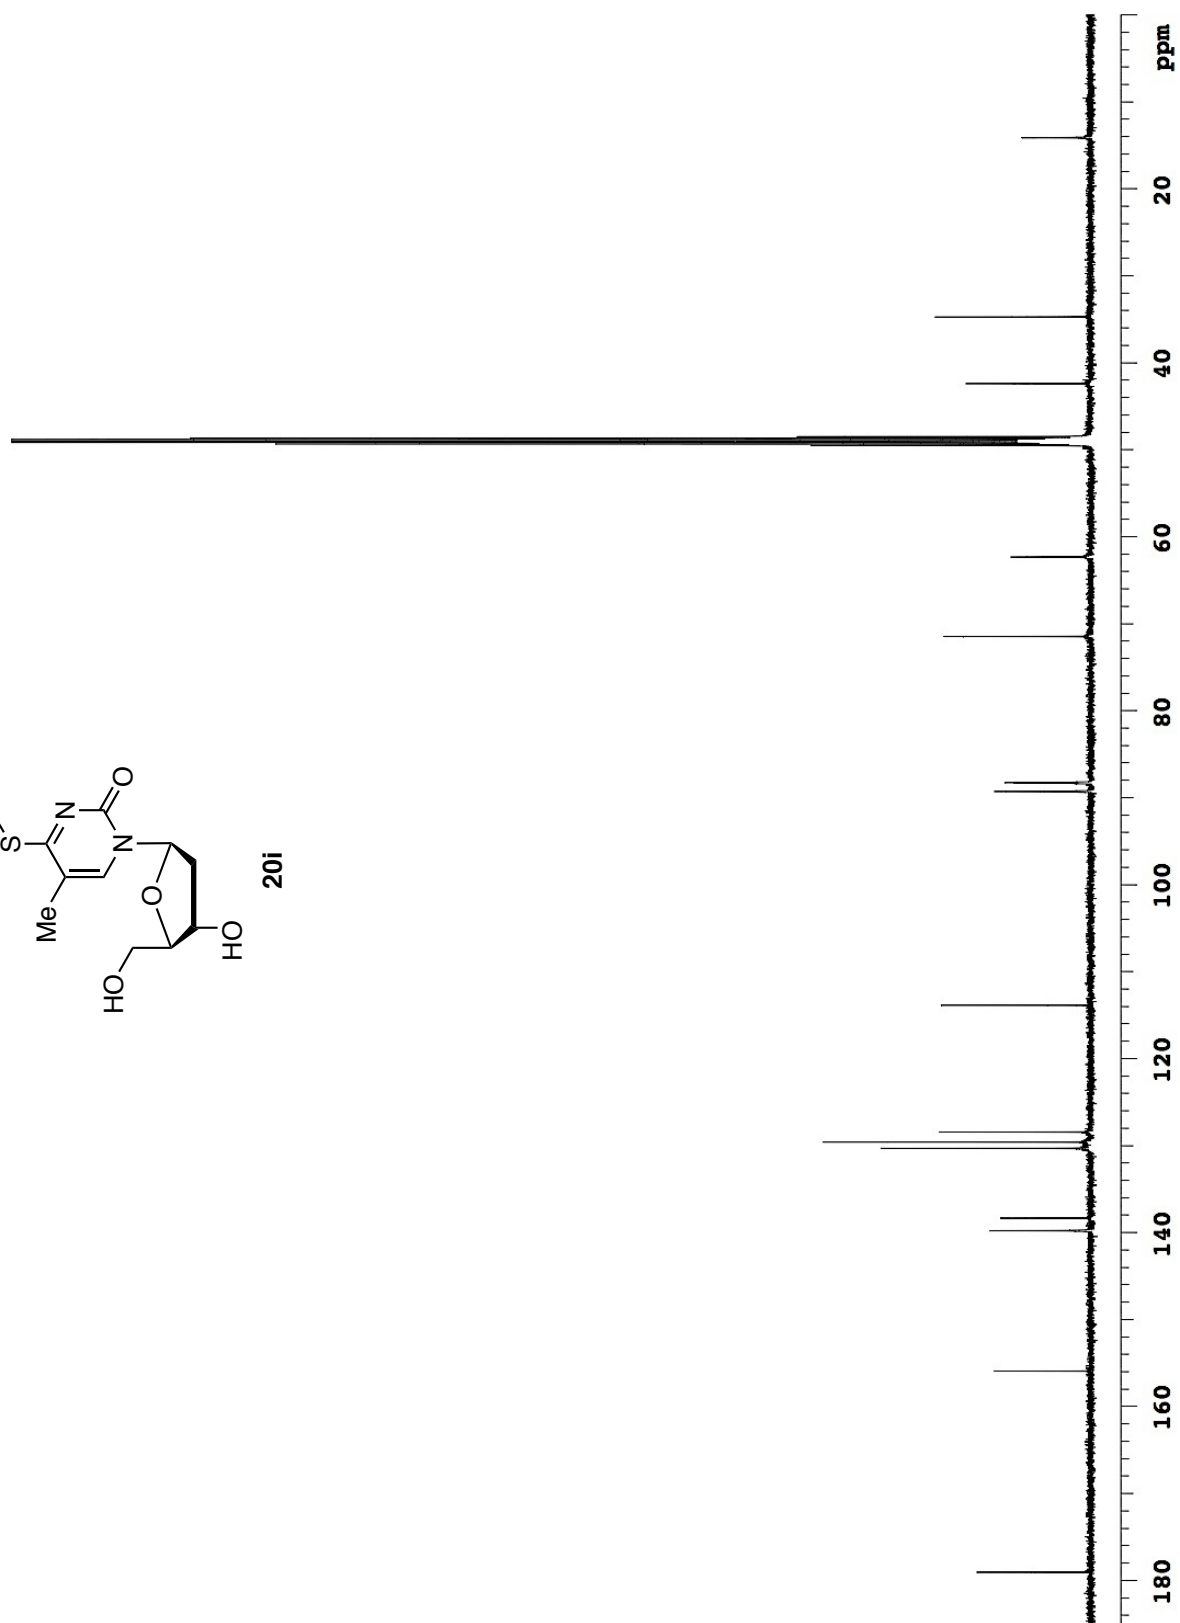

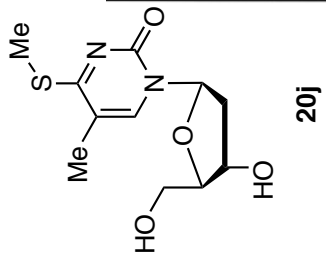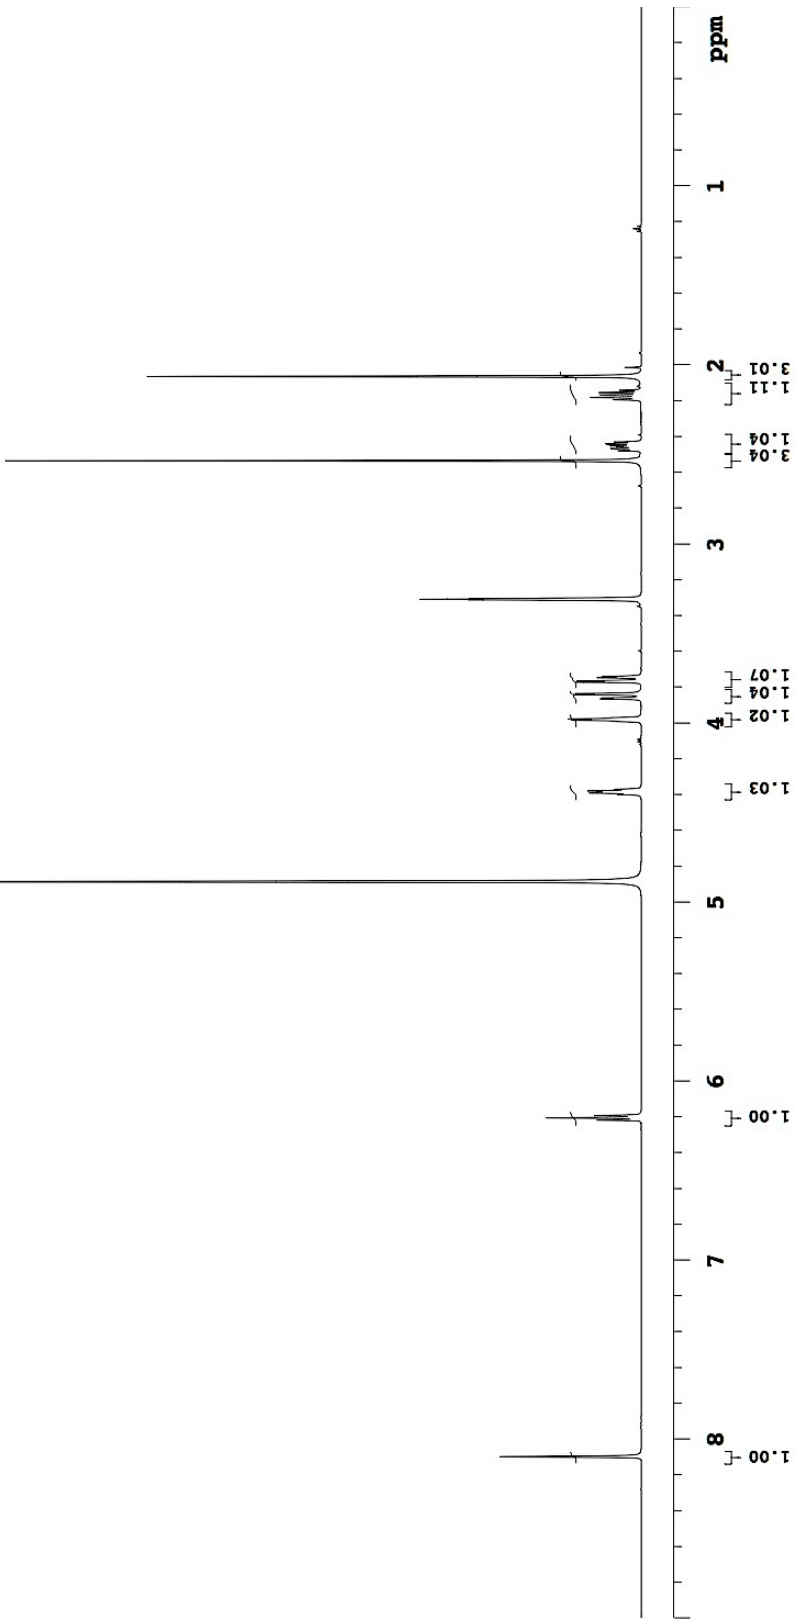

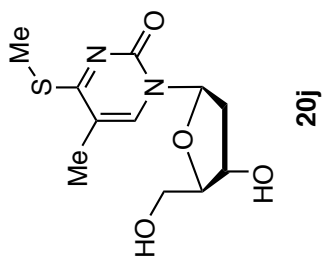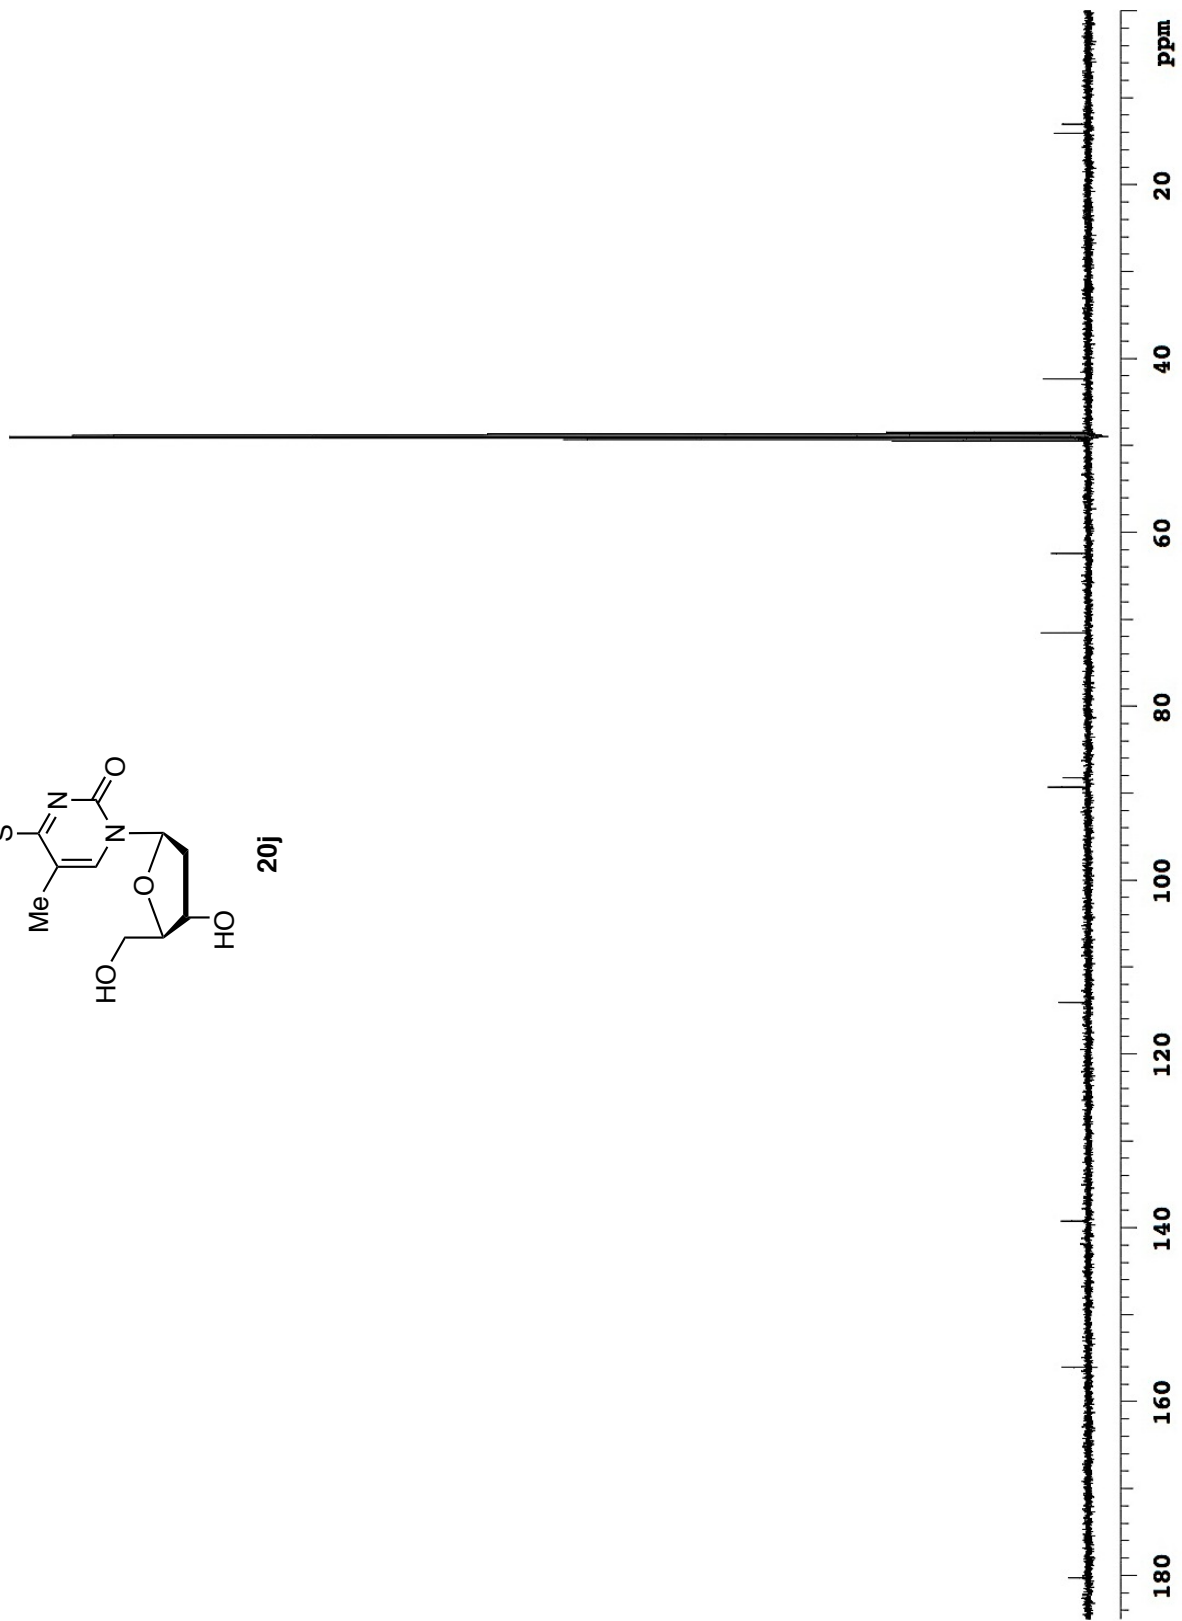

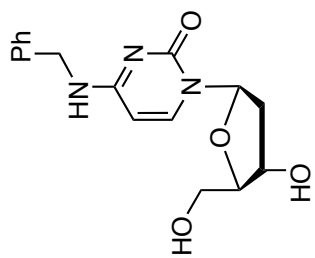

21a

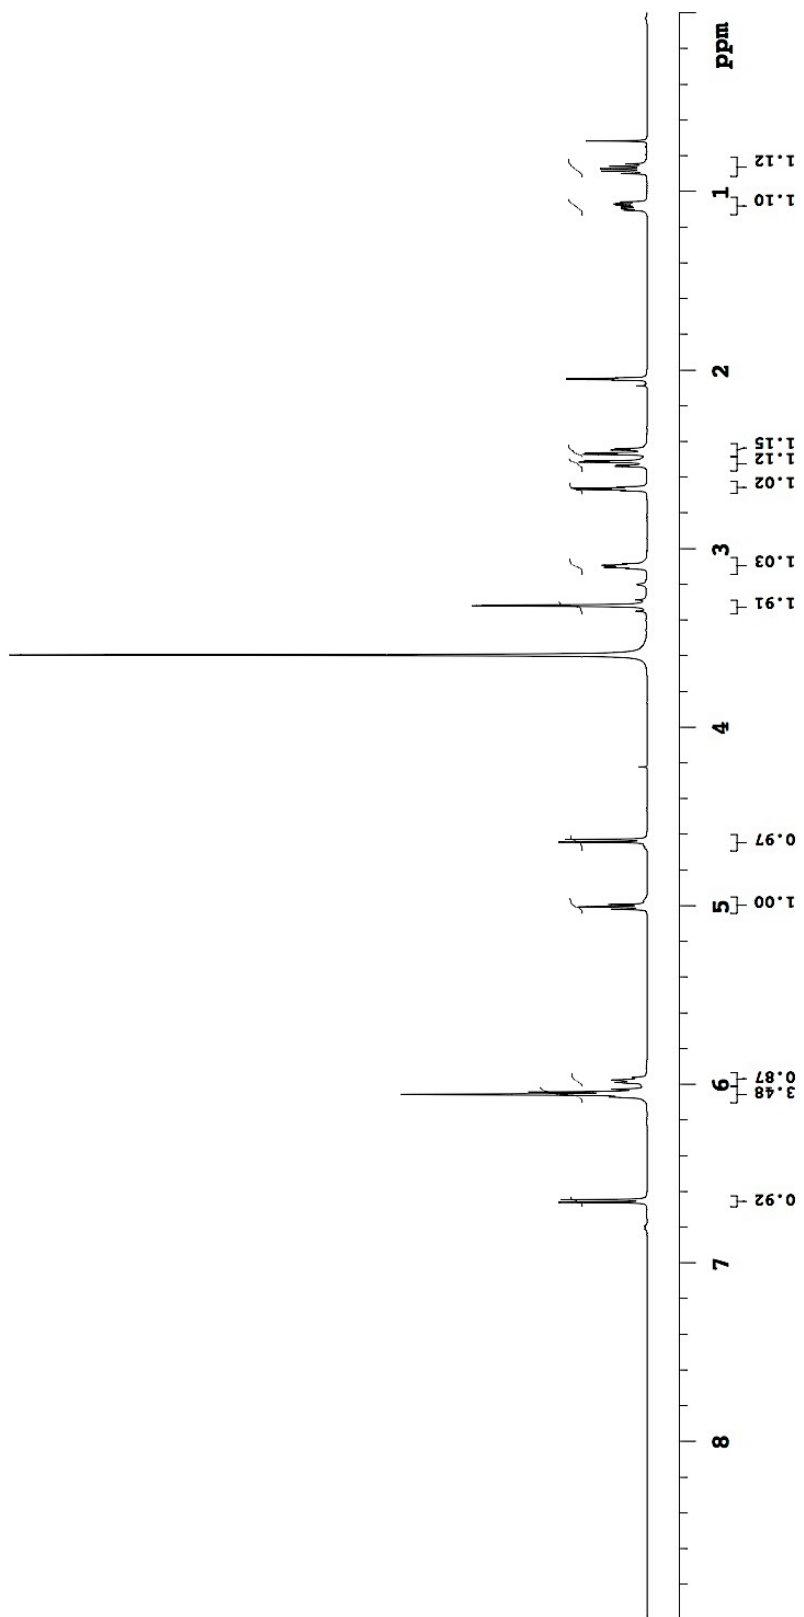

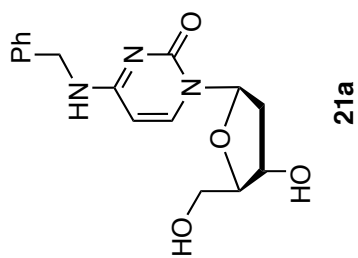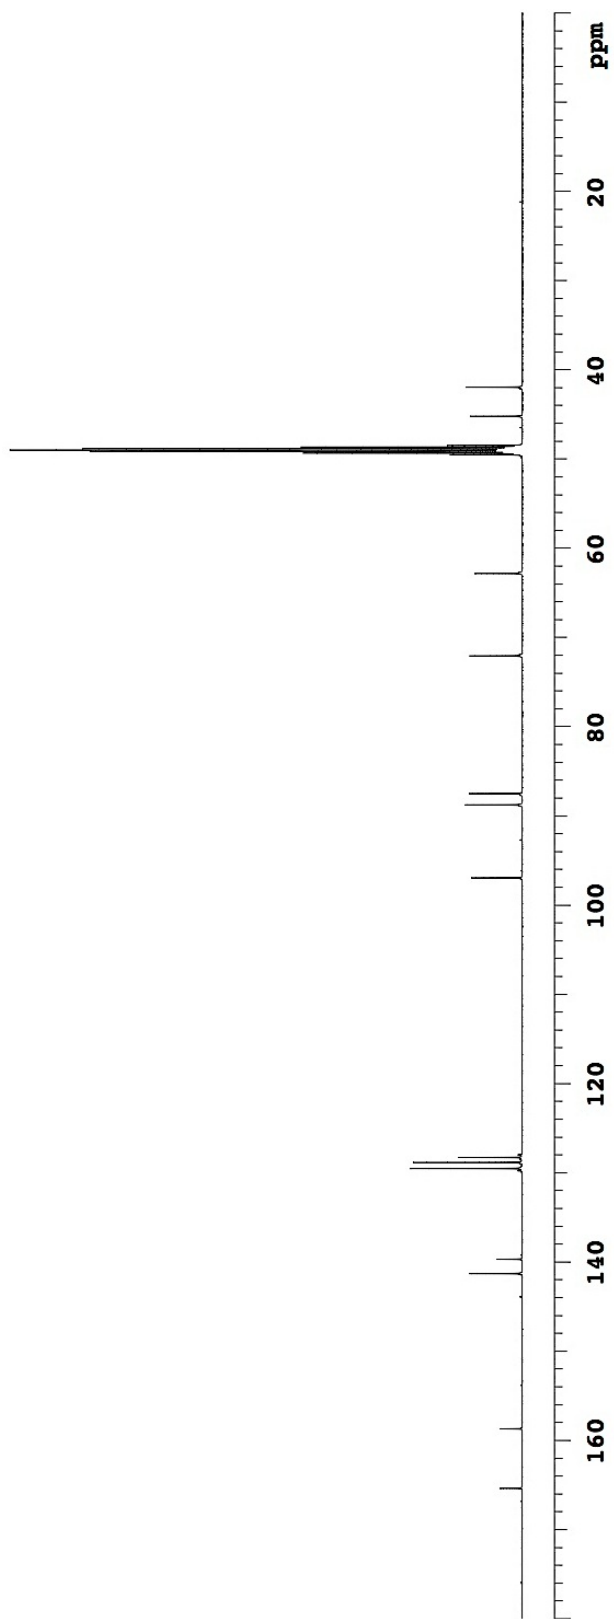



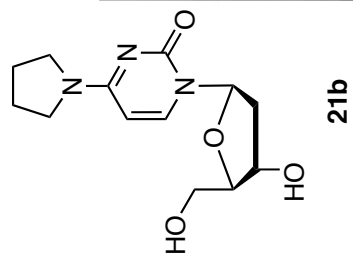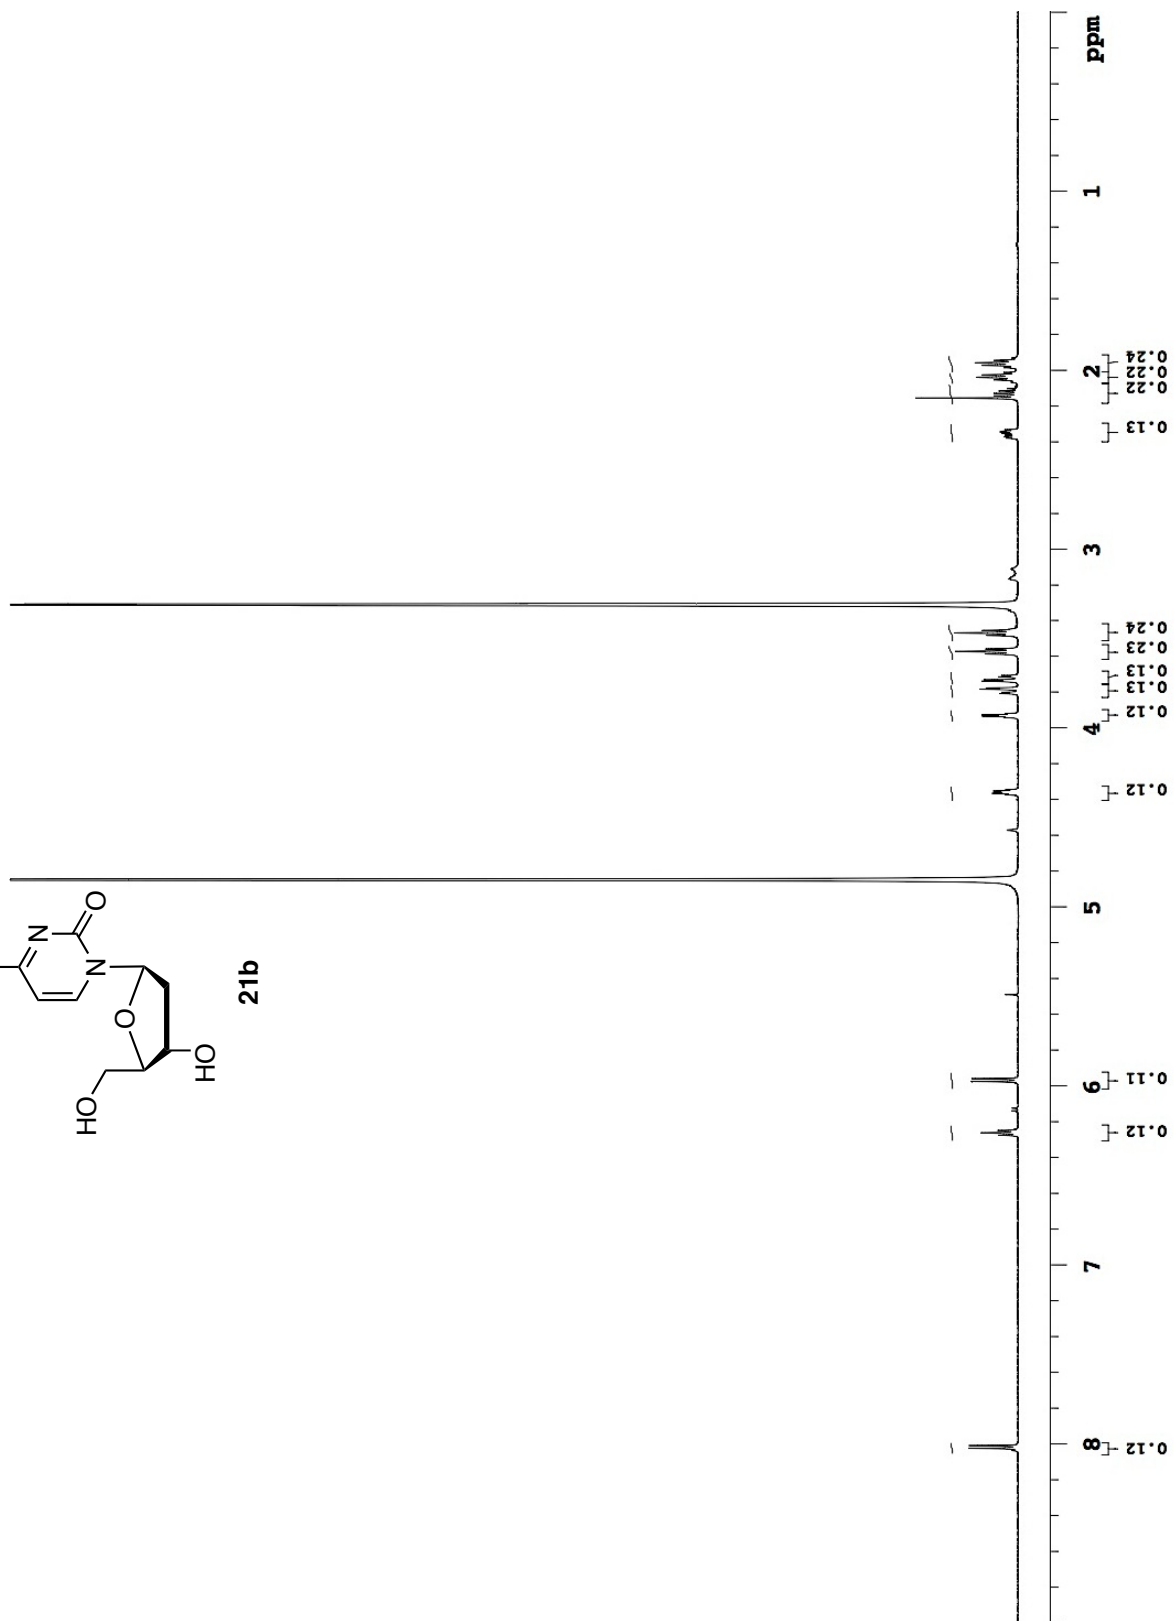

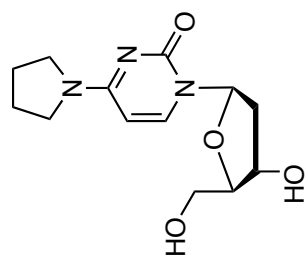

21b

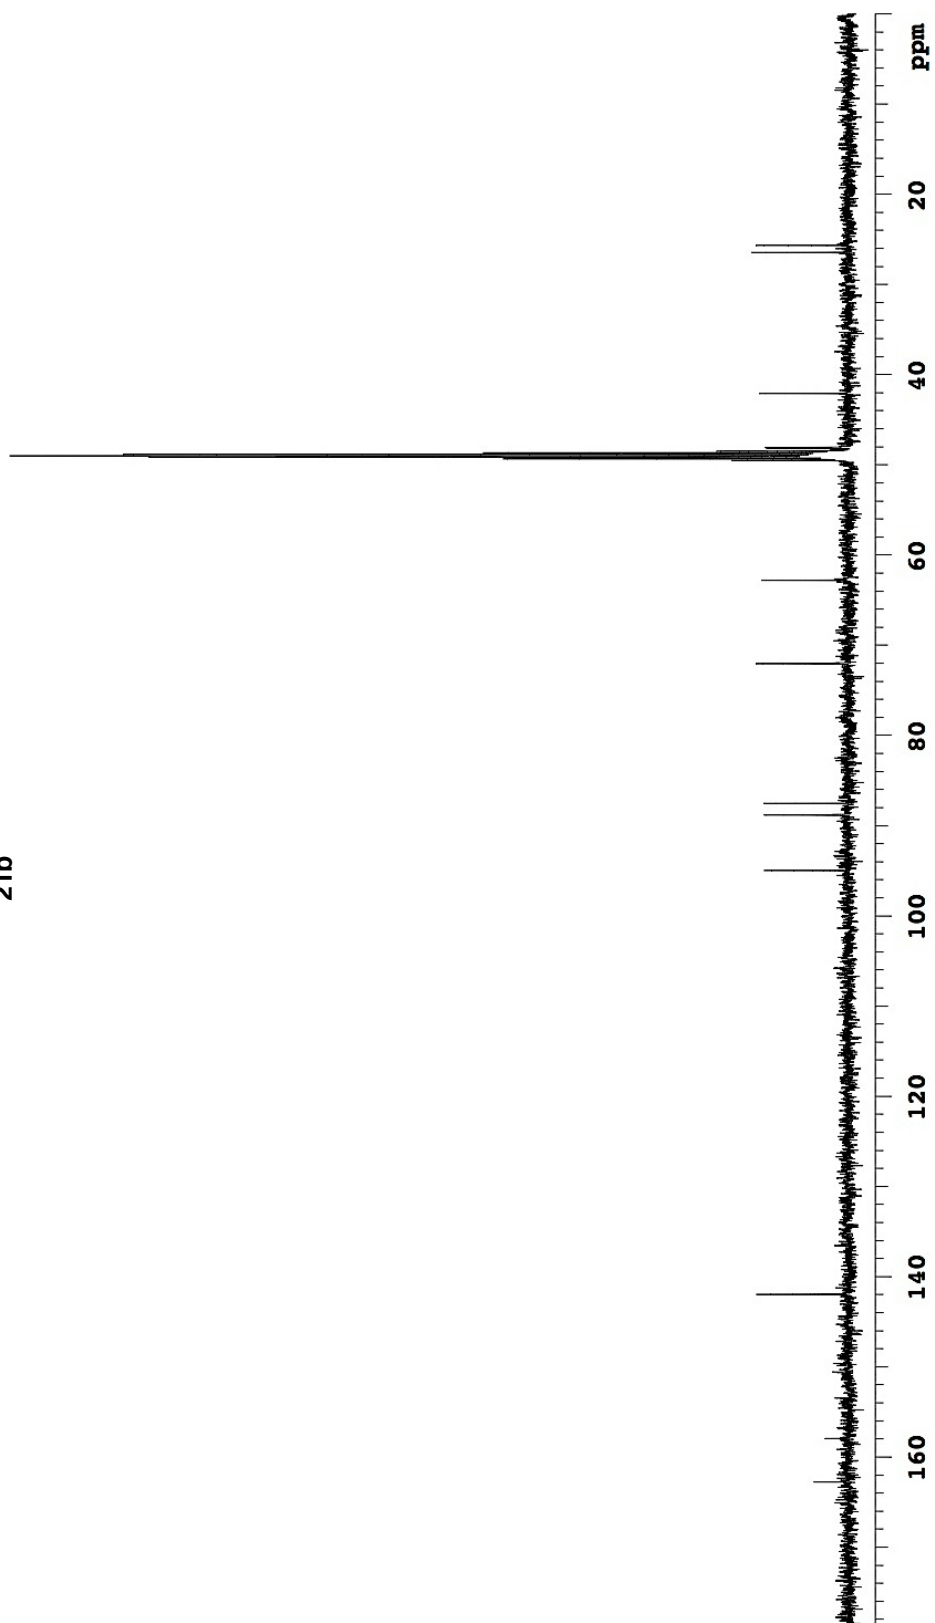

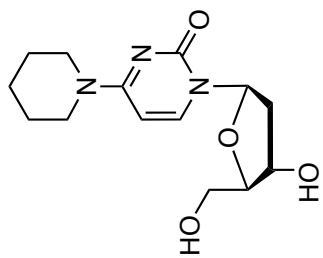

21c

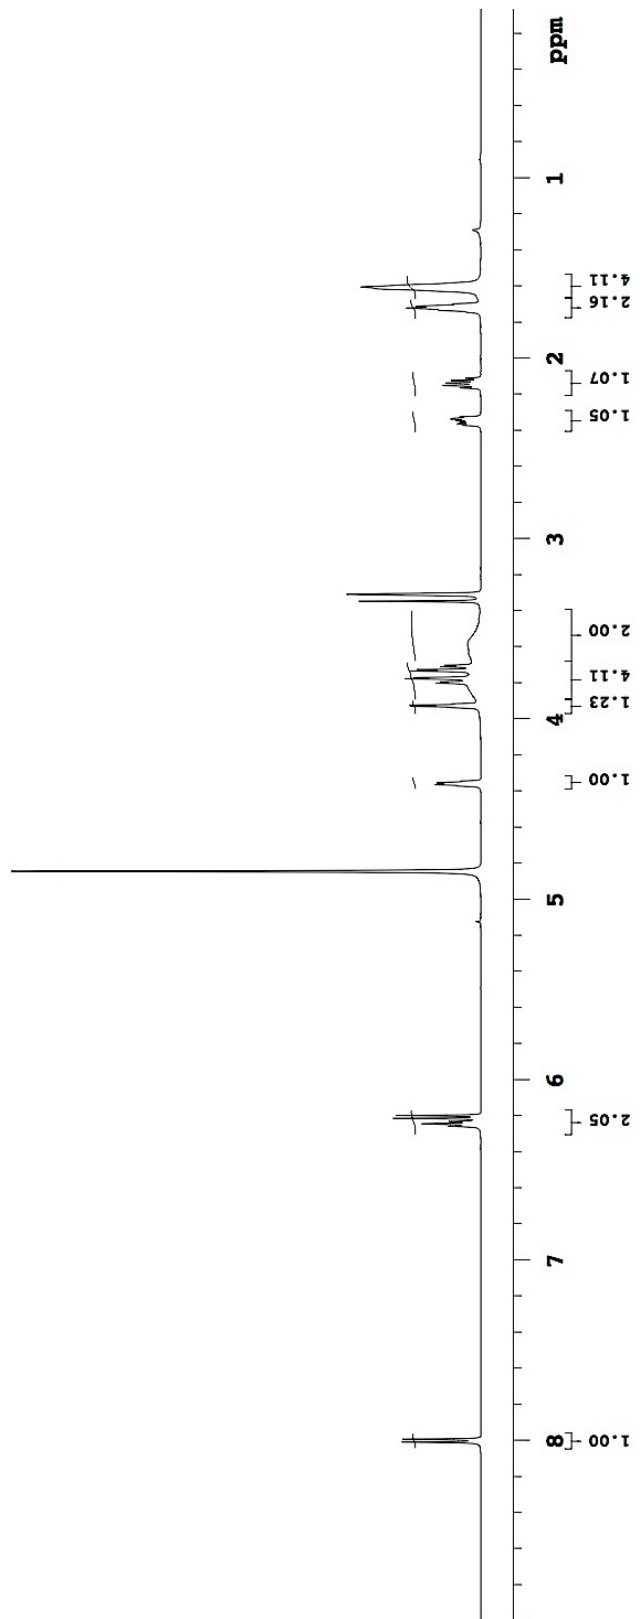

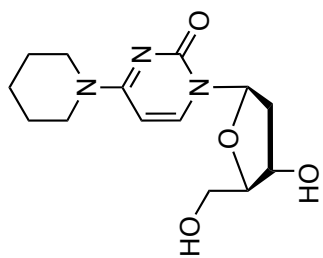

21c

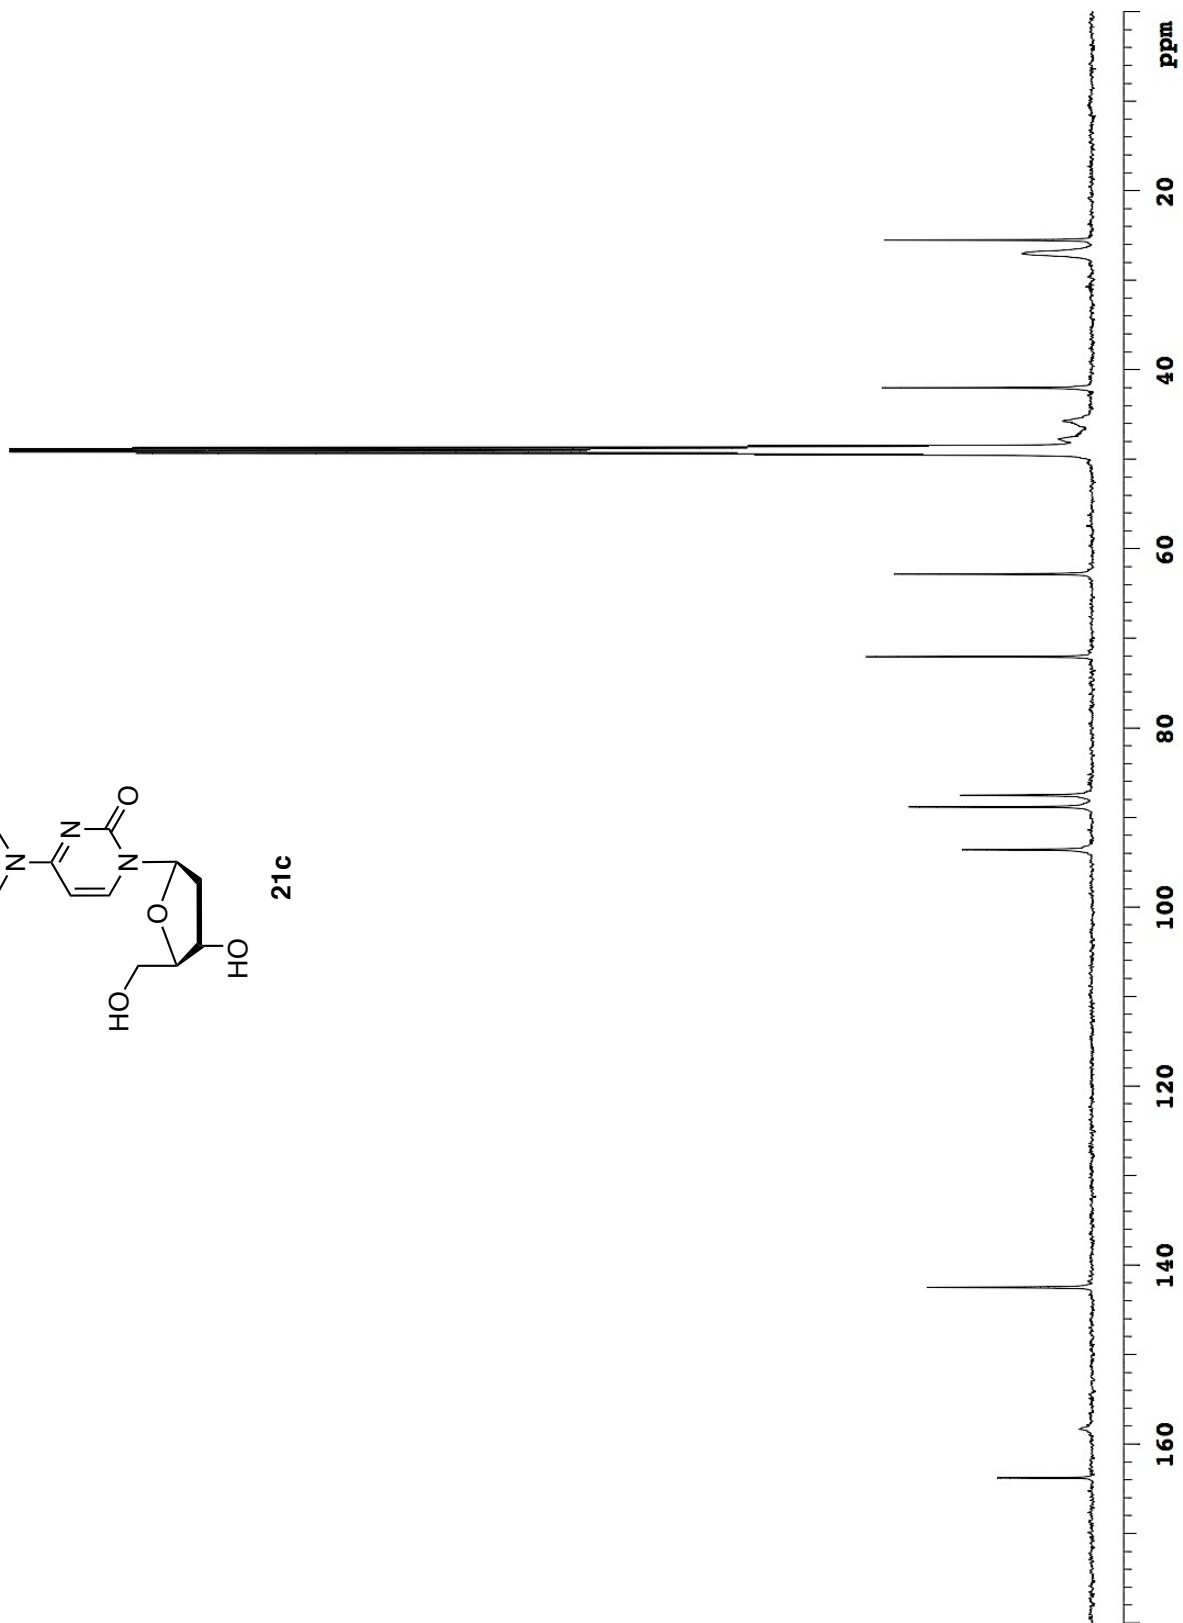

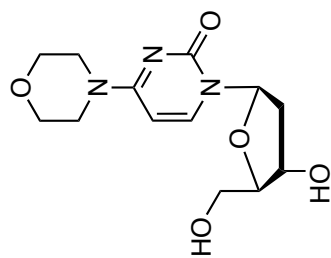

21d

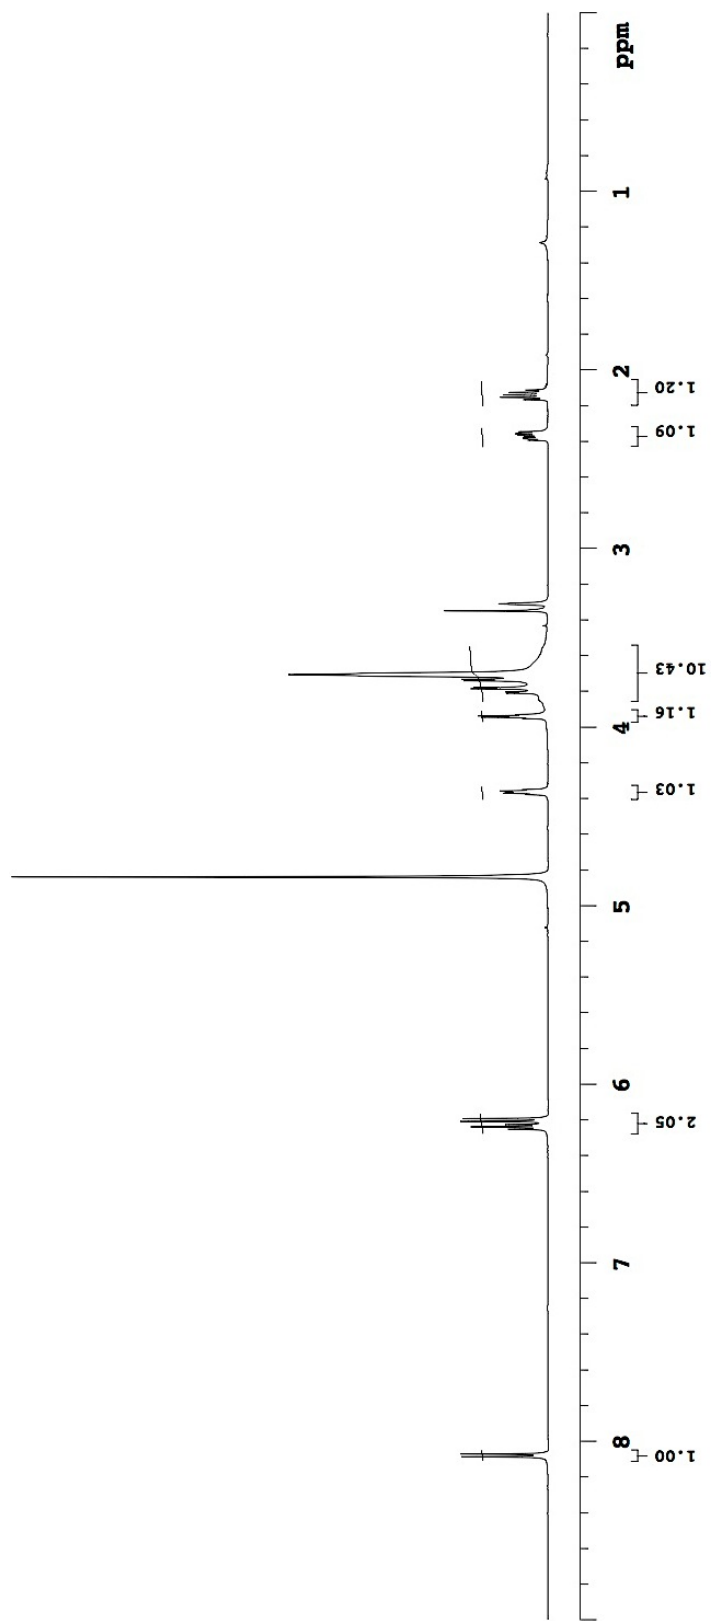

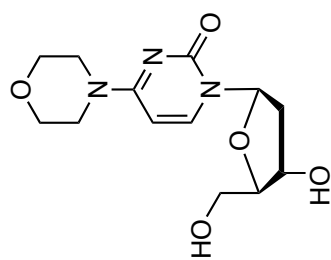

21d

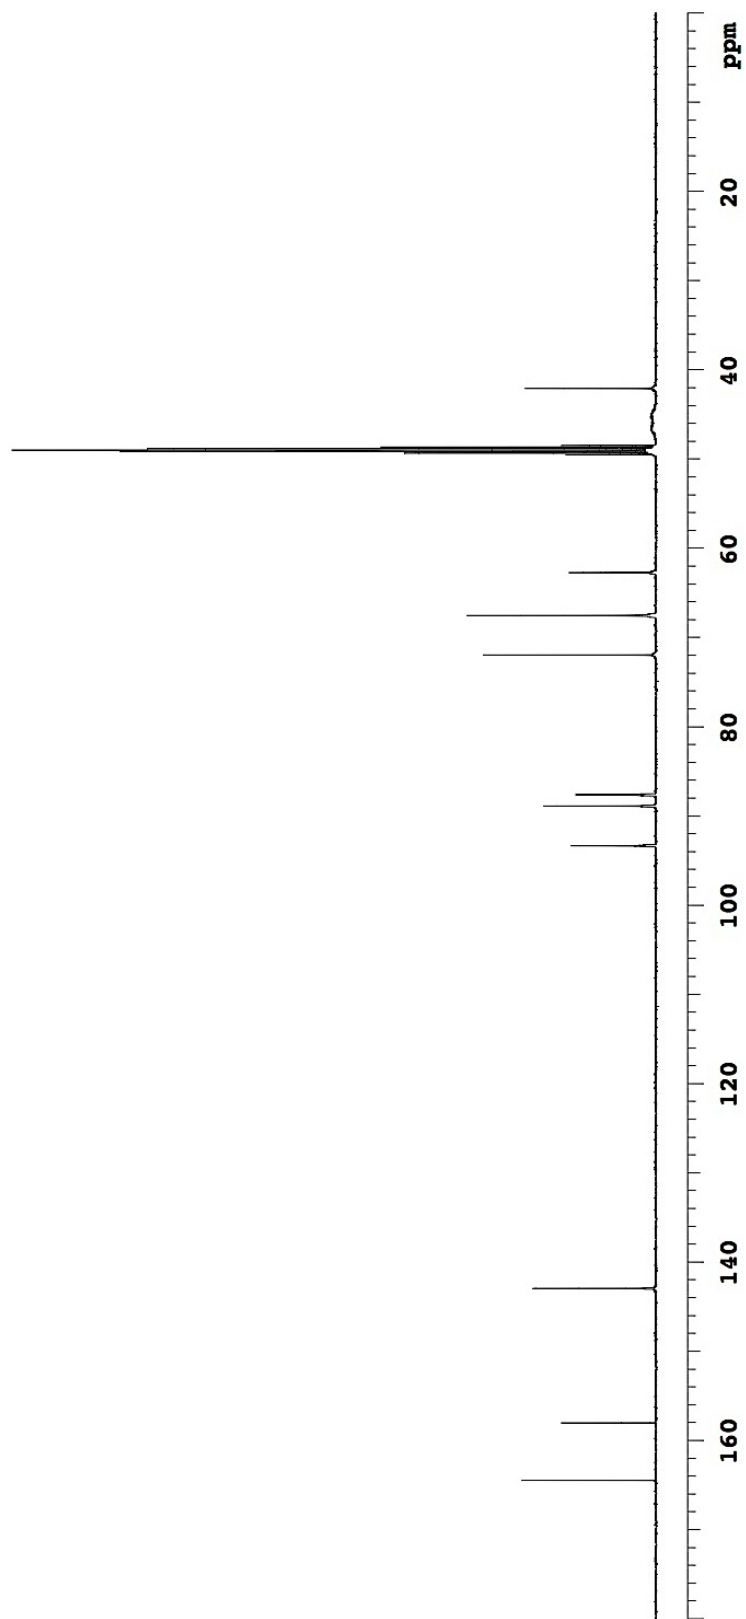

gCOSY spectrum of compound **21d** in CD<sub>3</sub>OD

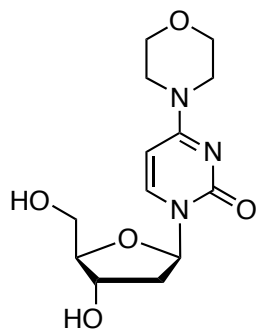

**21d**

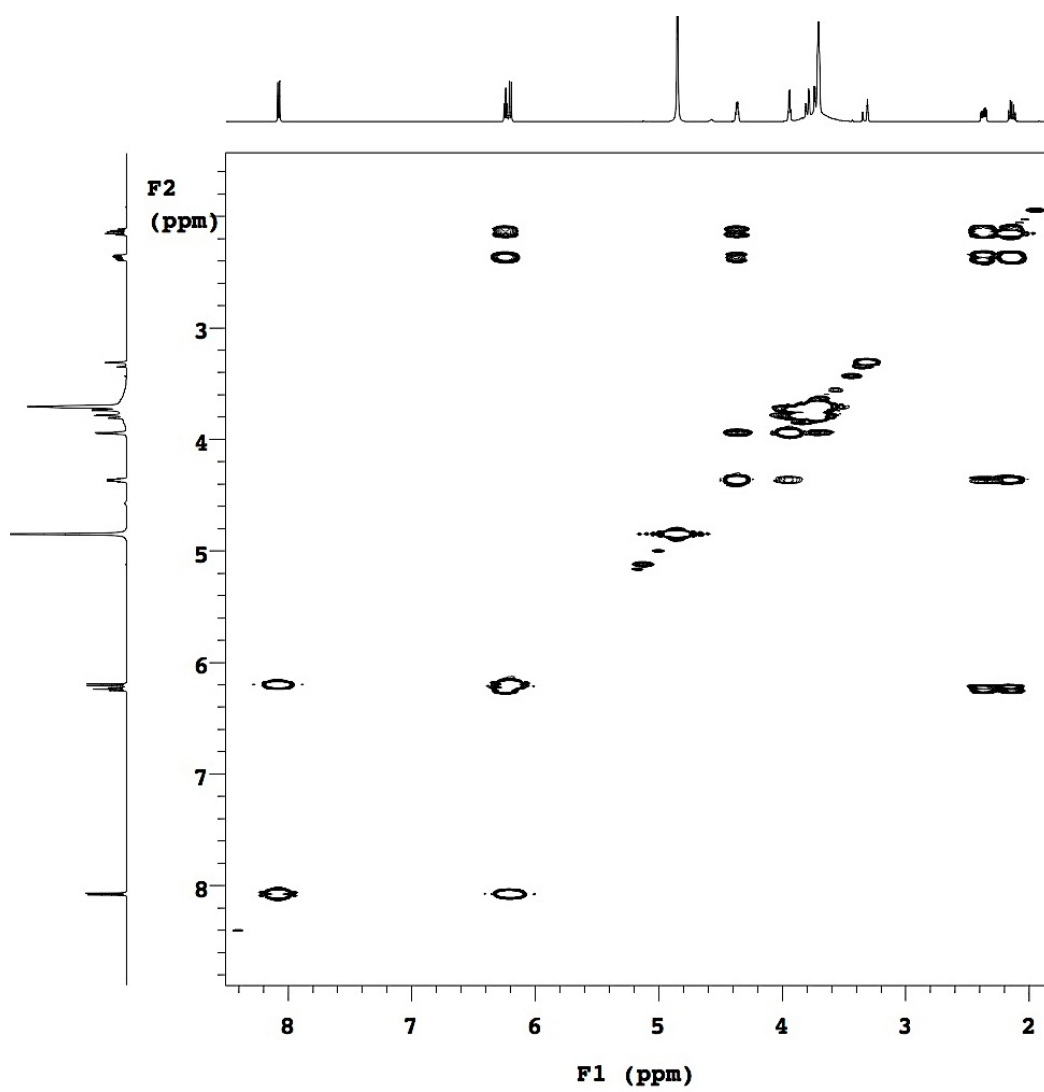

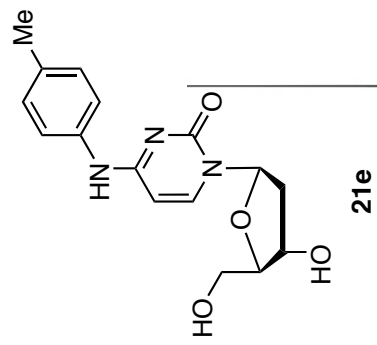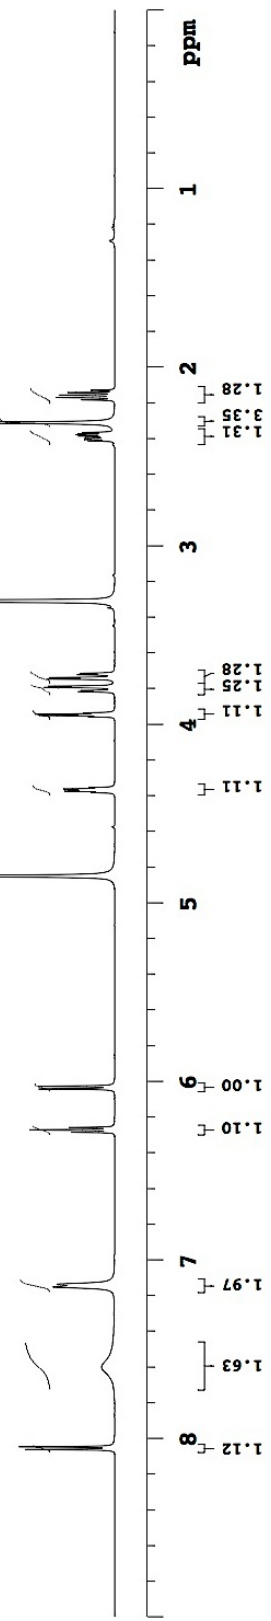



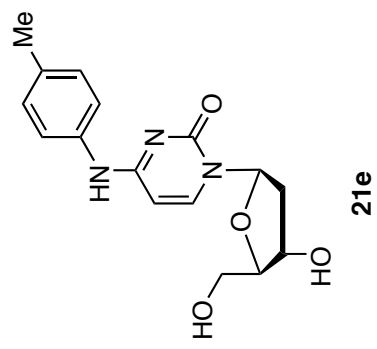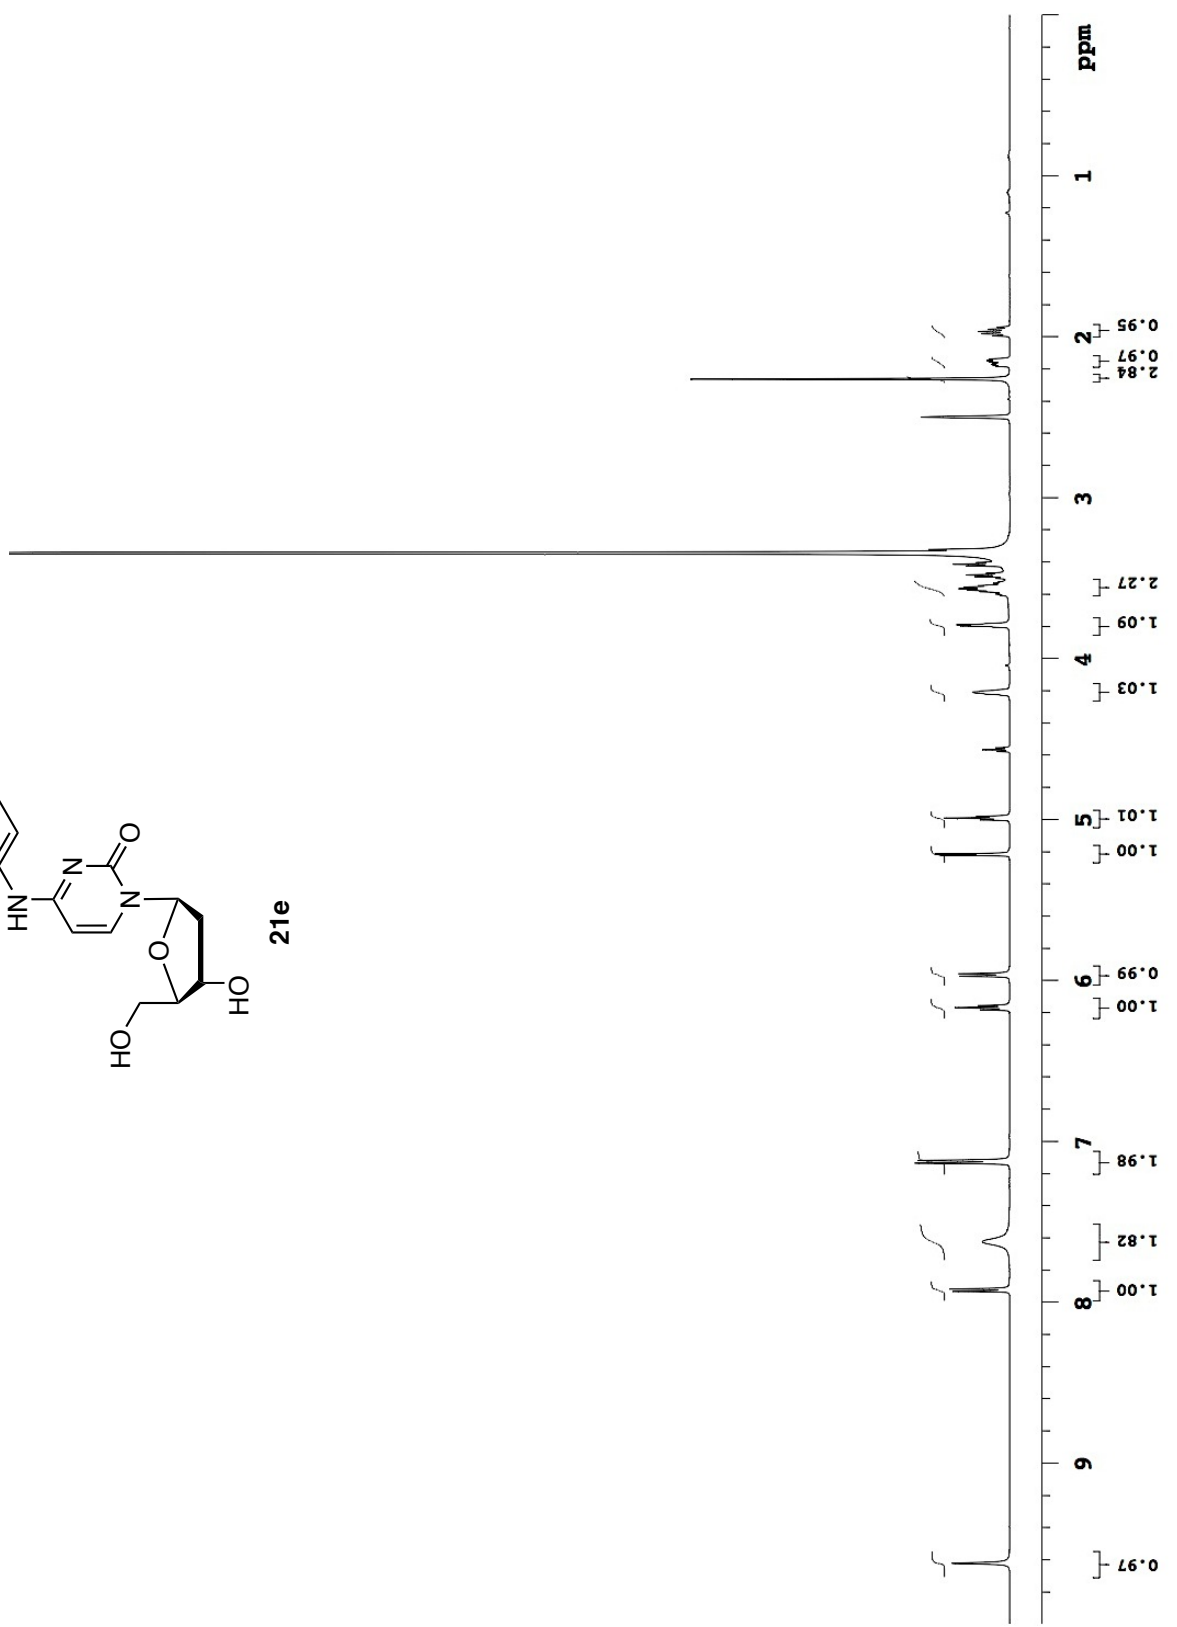

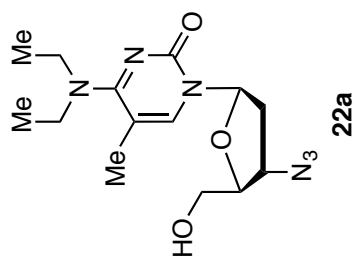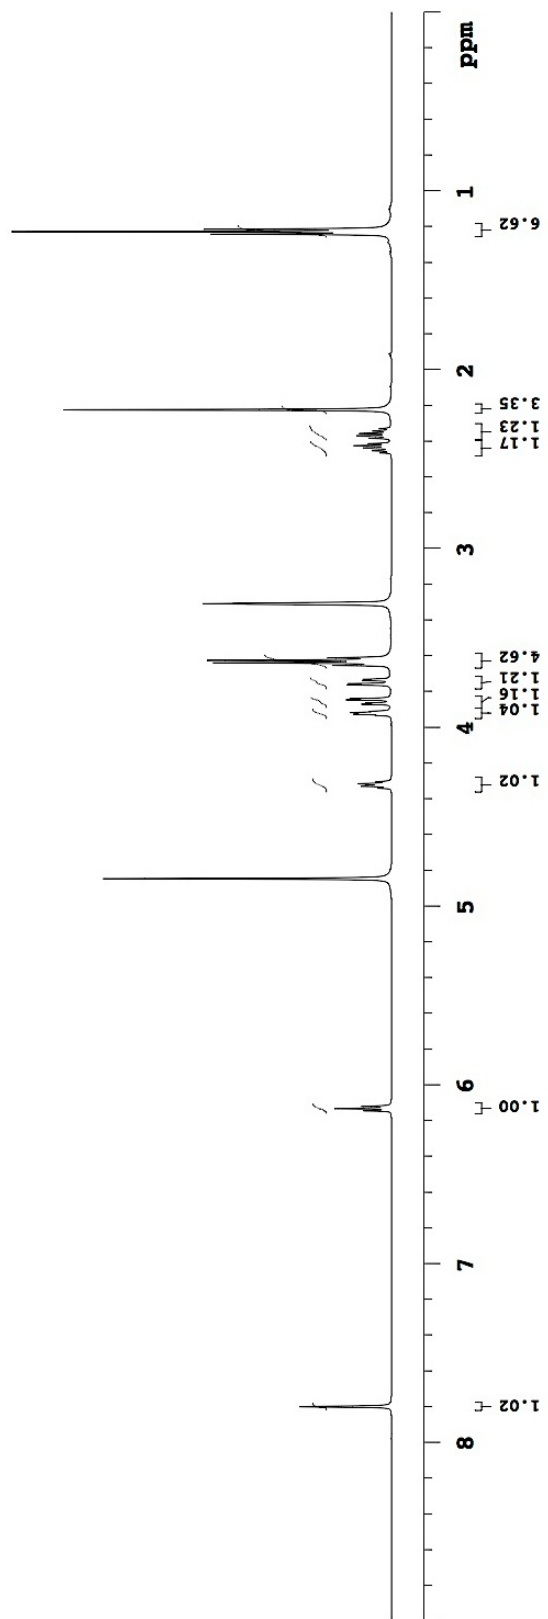

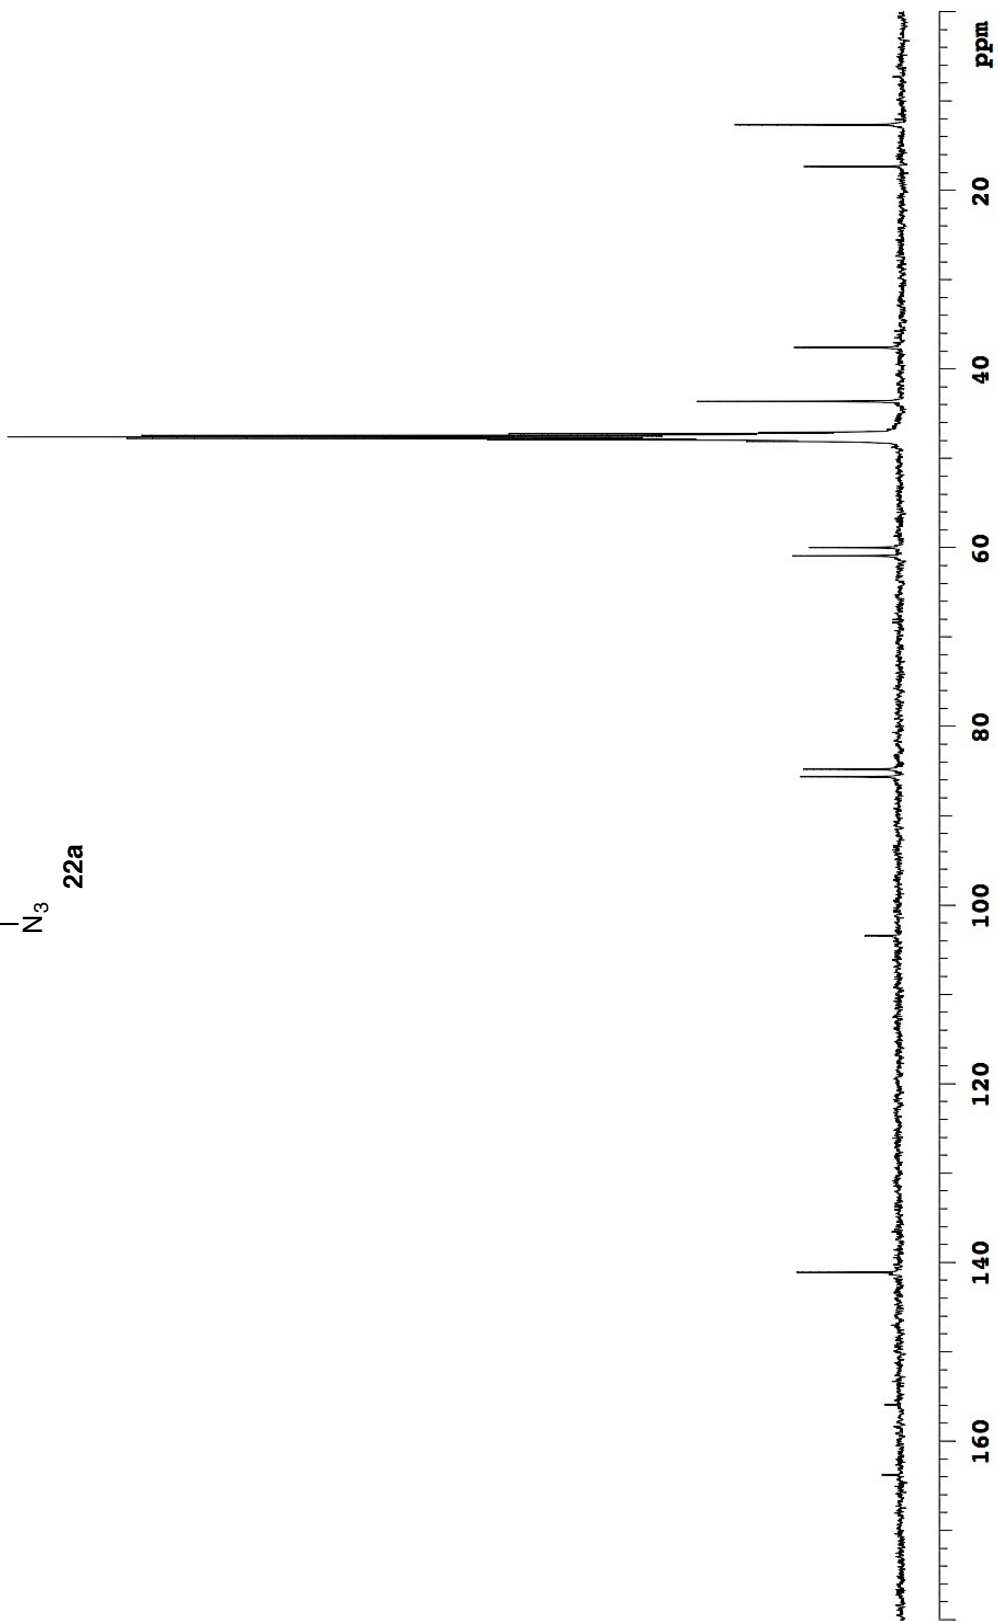

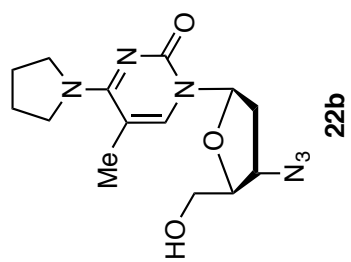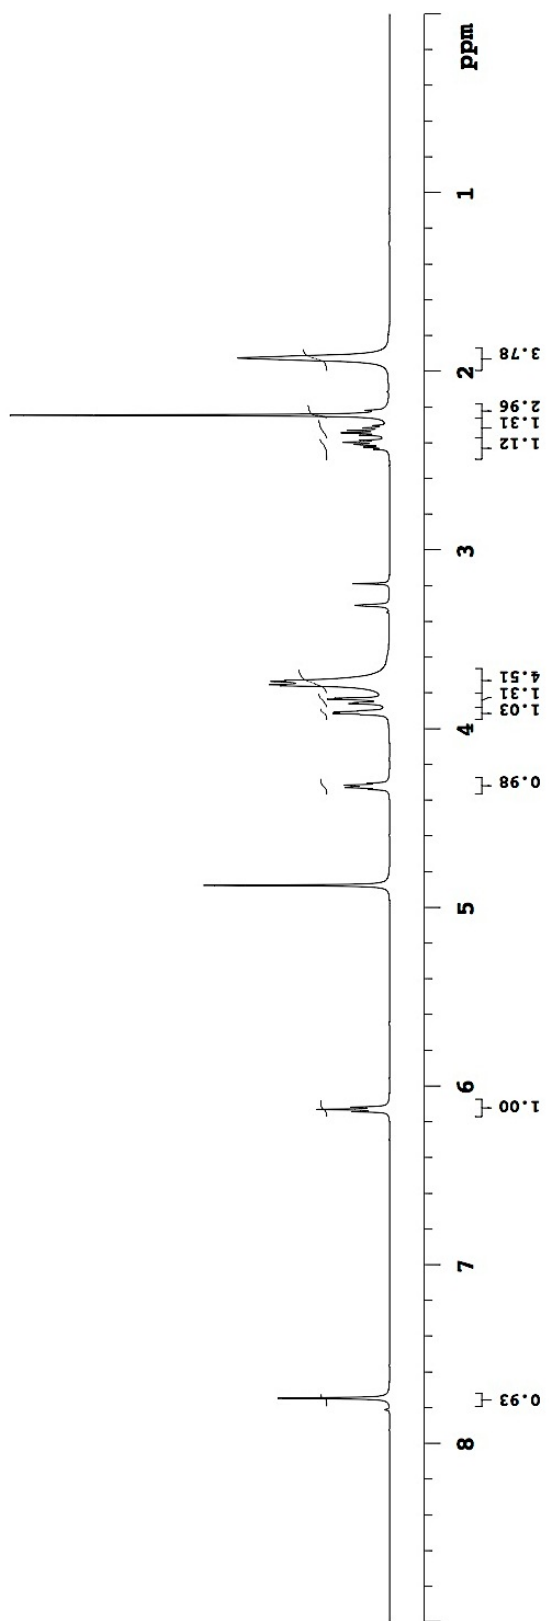

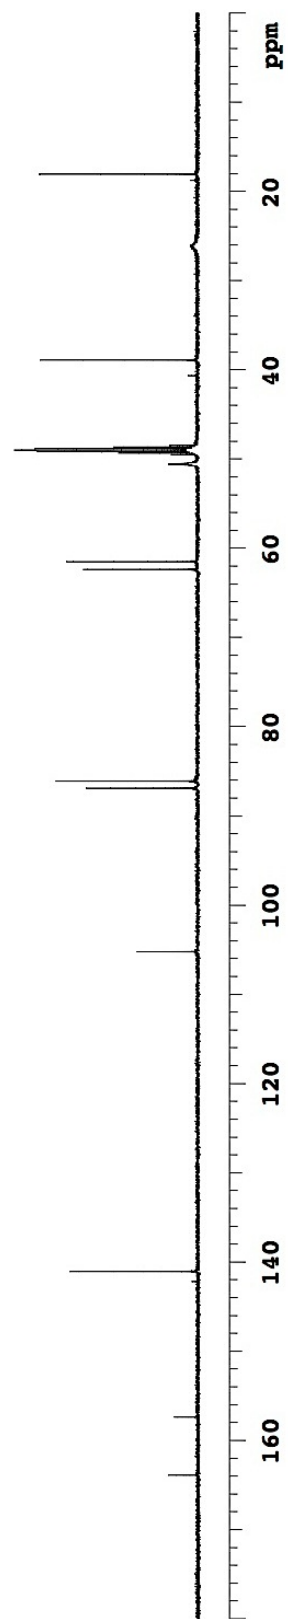

gCOSY spectrum of compound **22b** in CD<sub>3</sub>OD

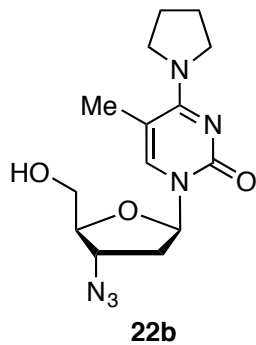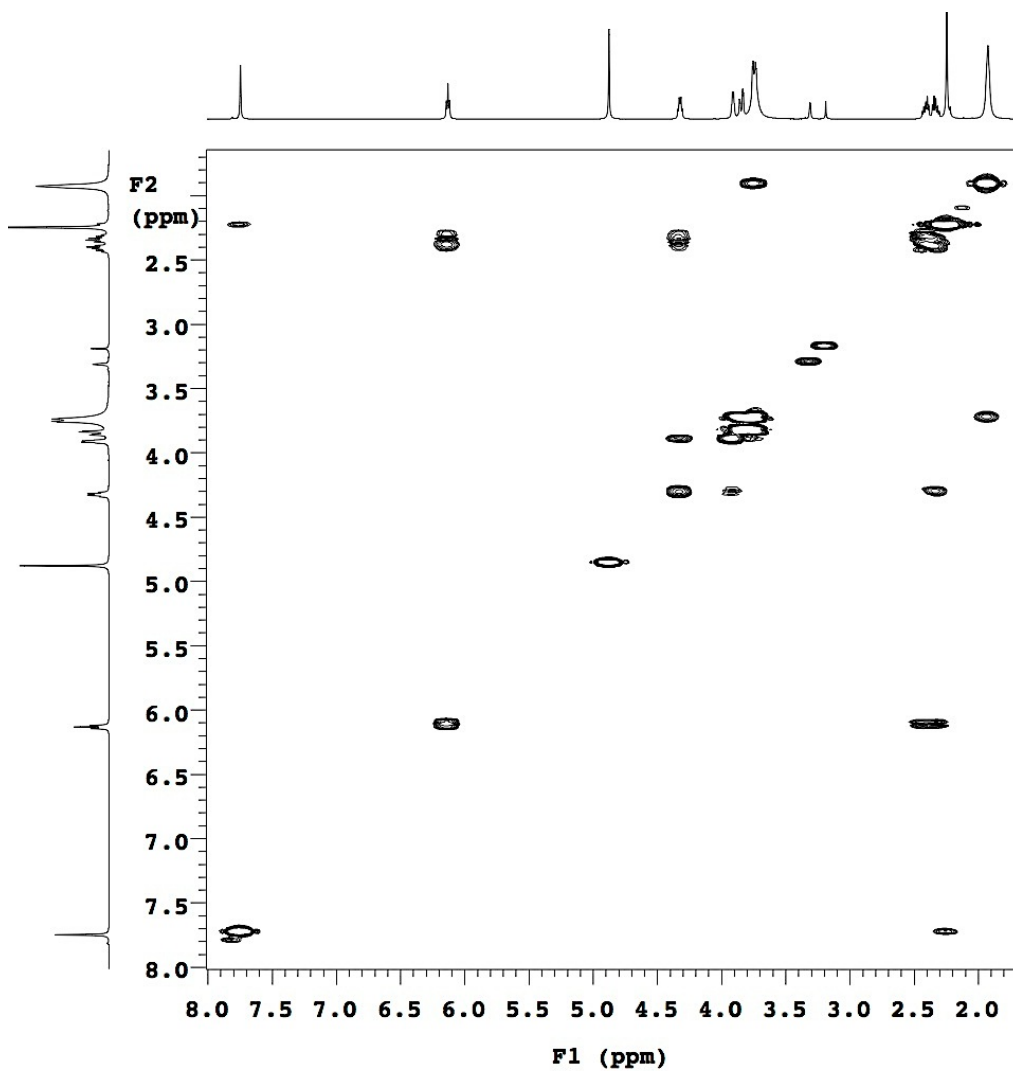

gHMQC spectrum of compound **22b** in CD<sub>3</sub>OD

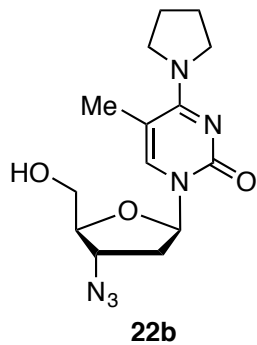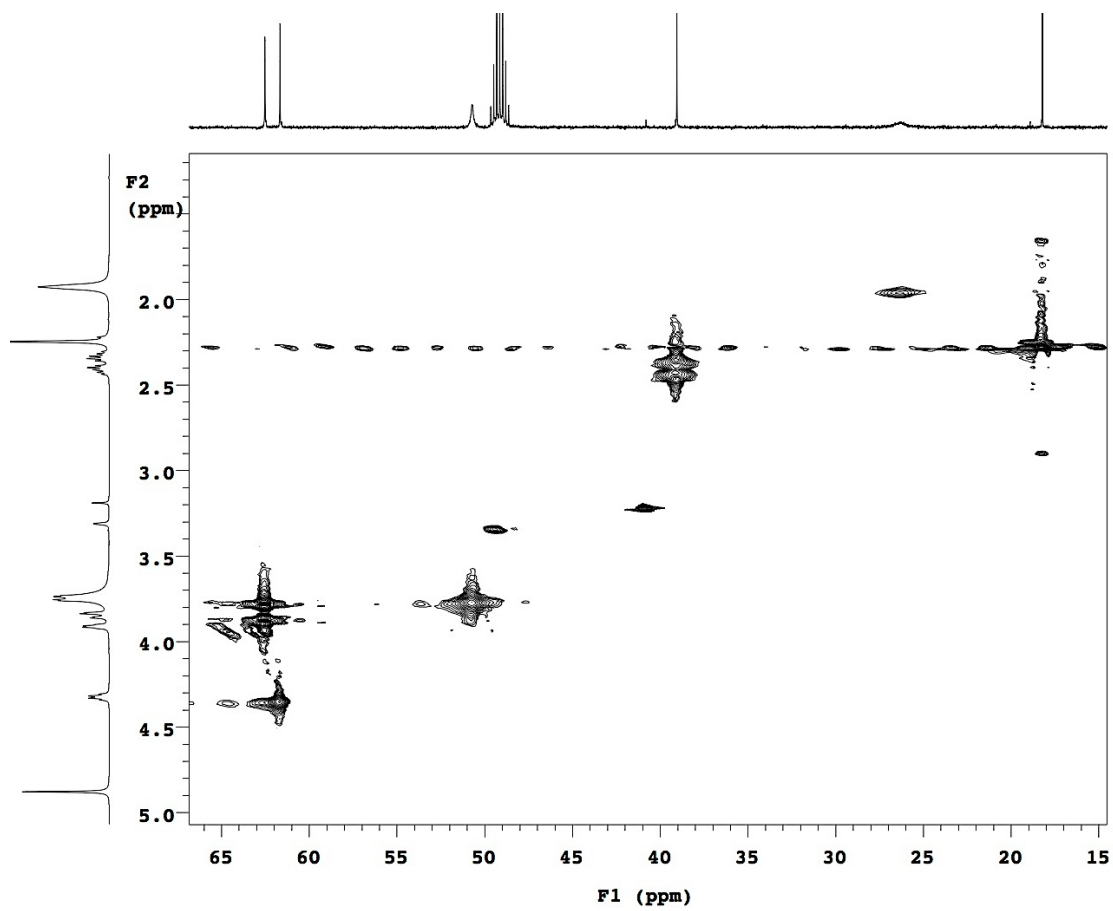

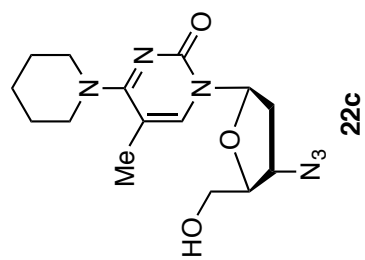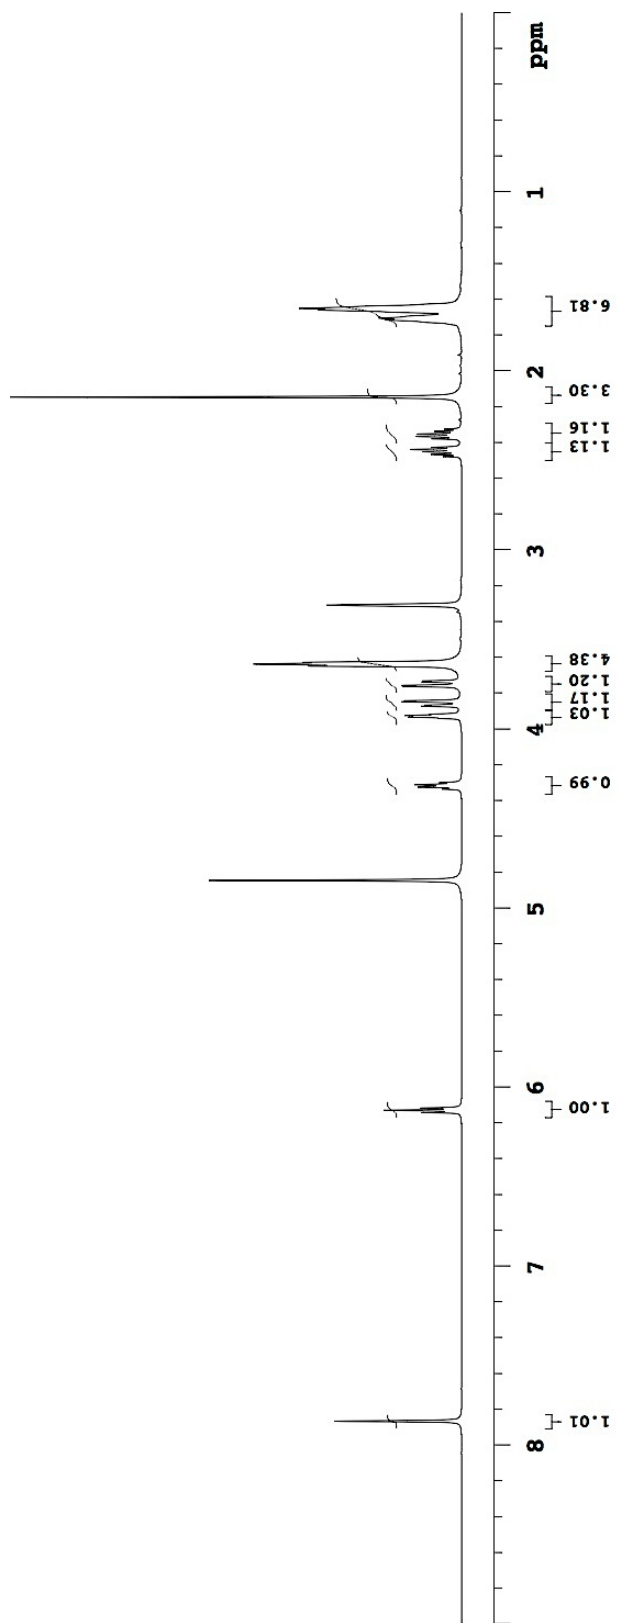



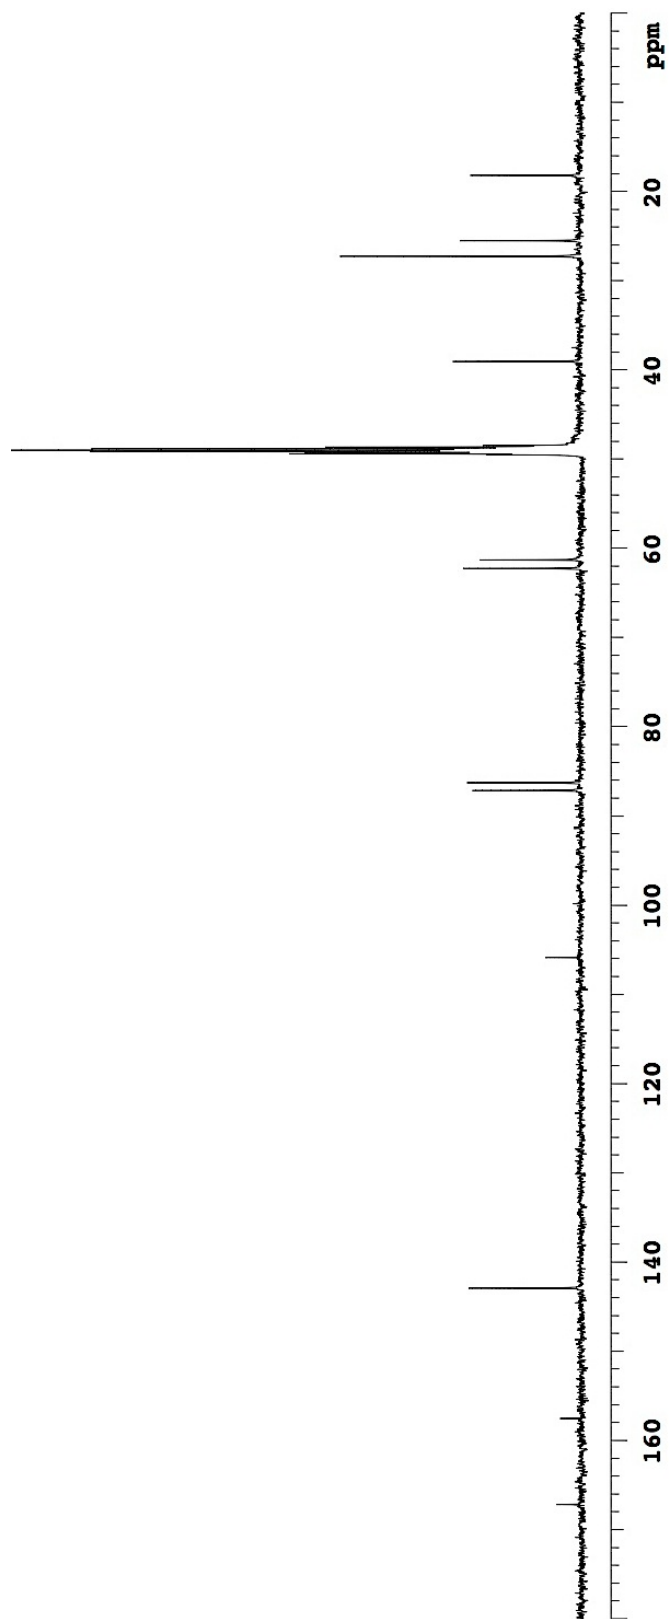

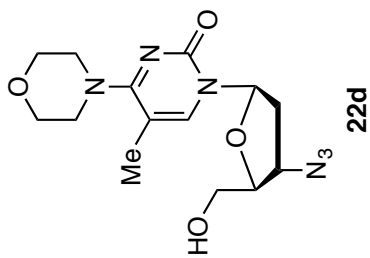

22d

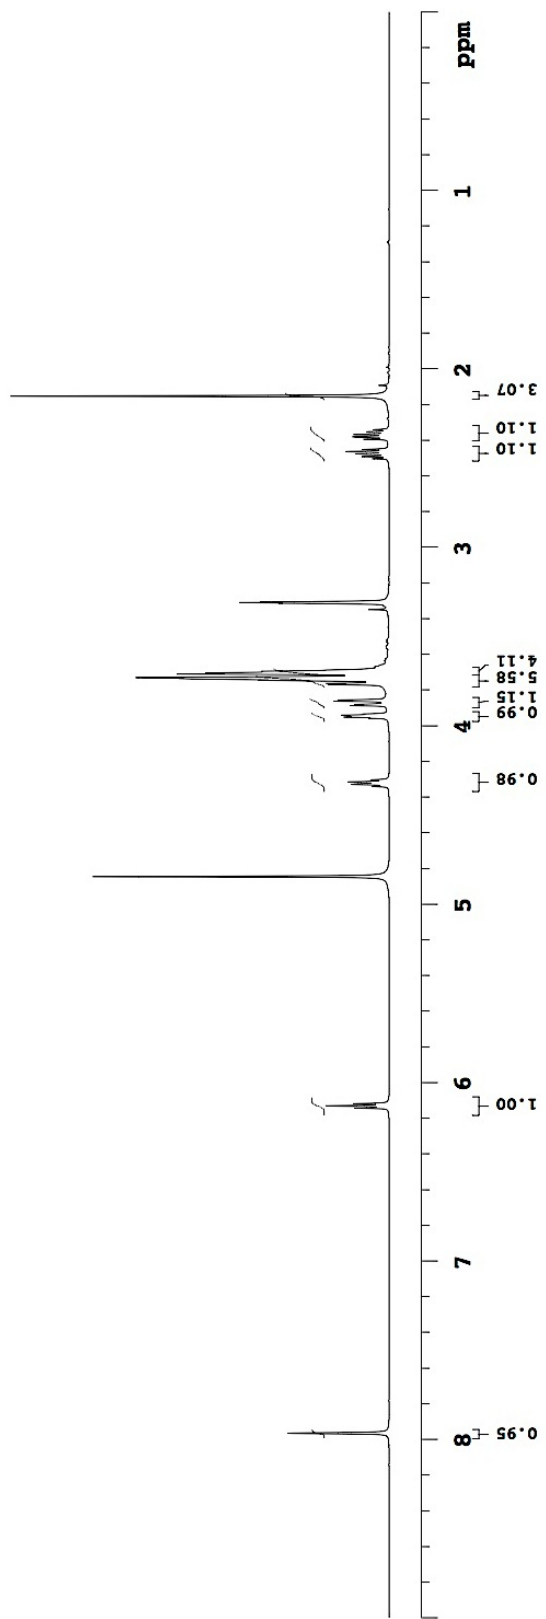

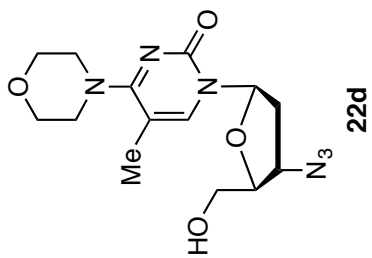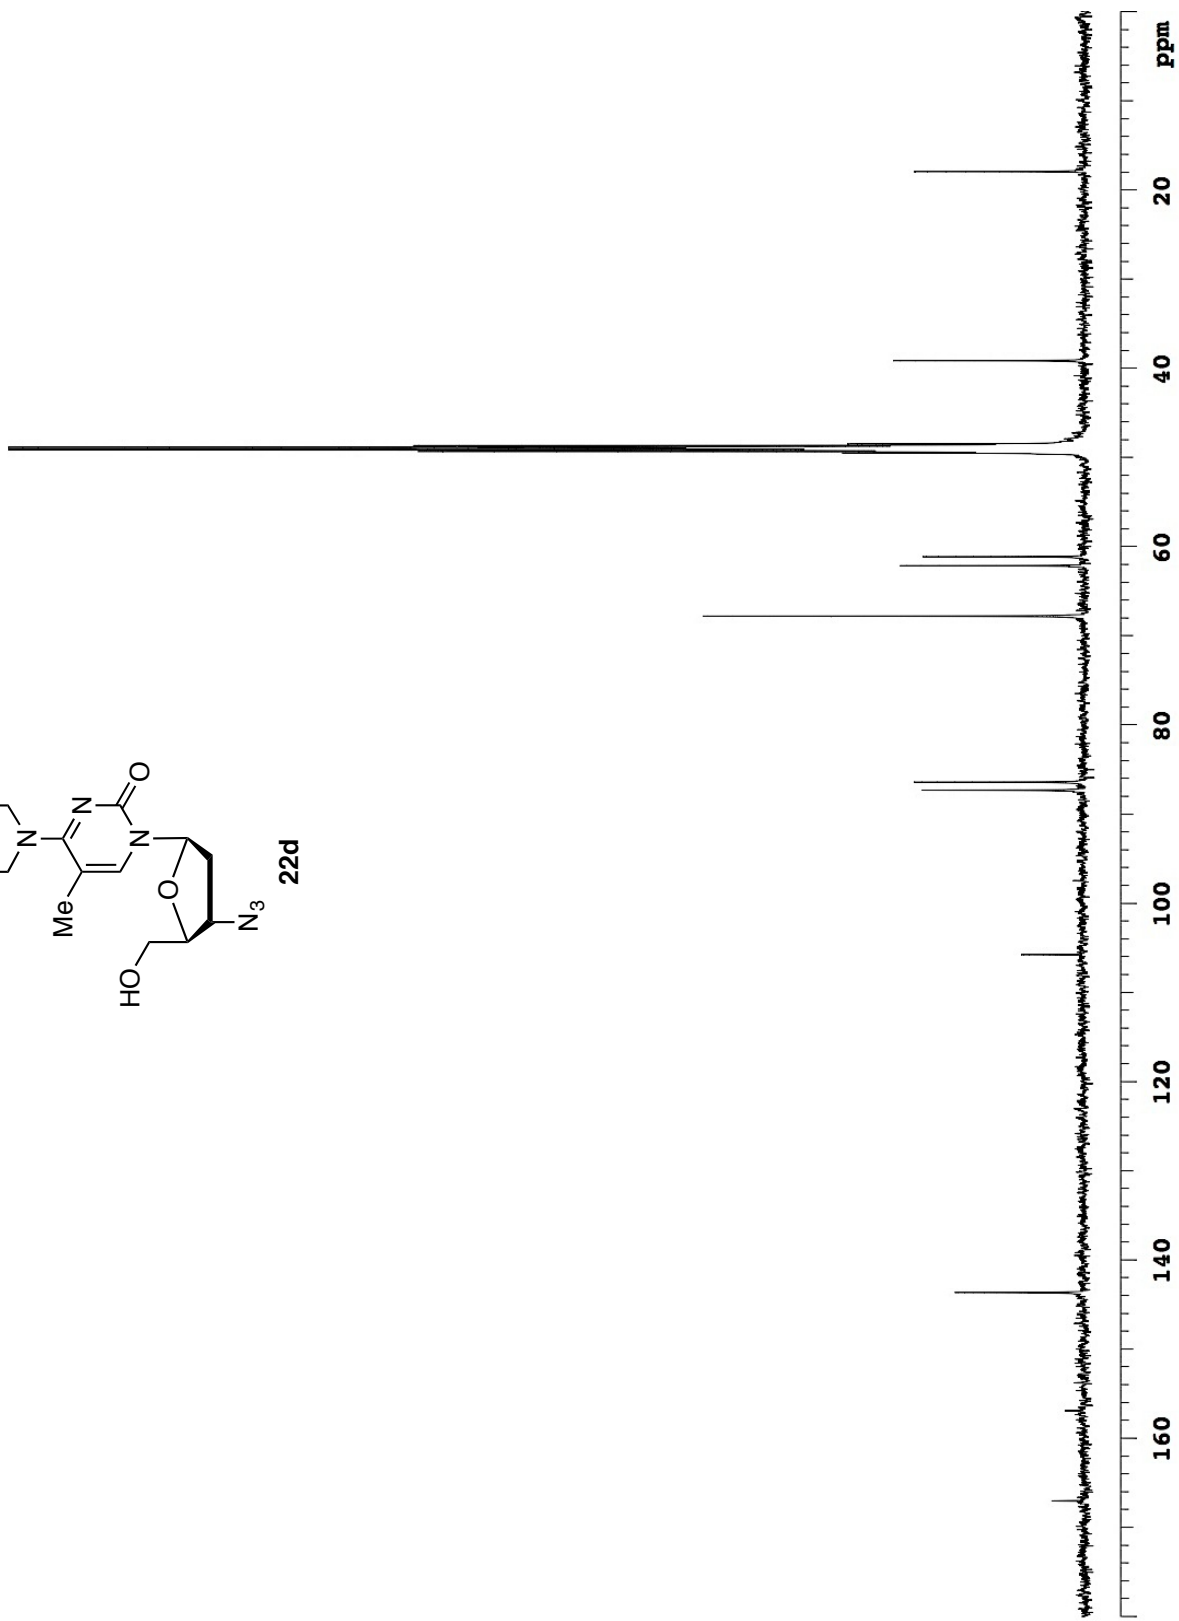

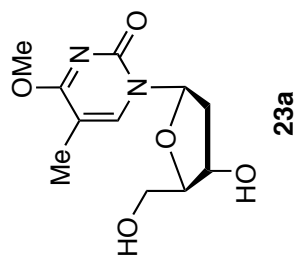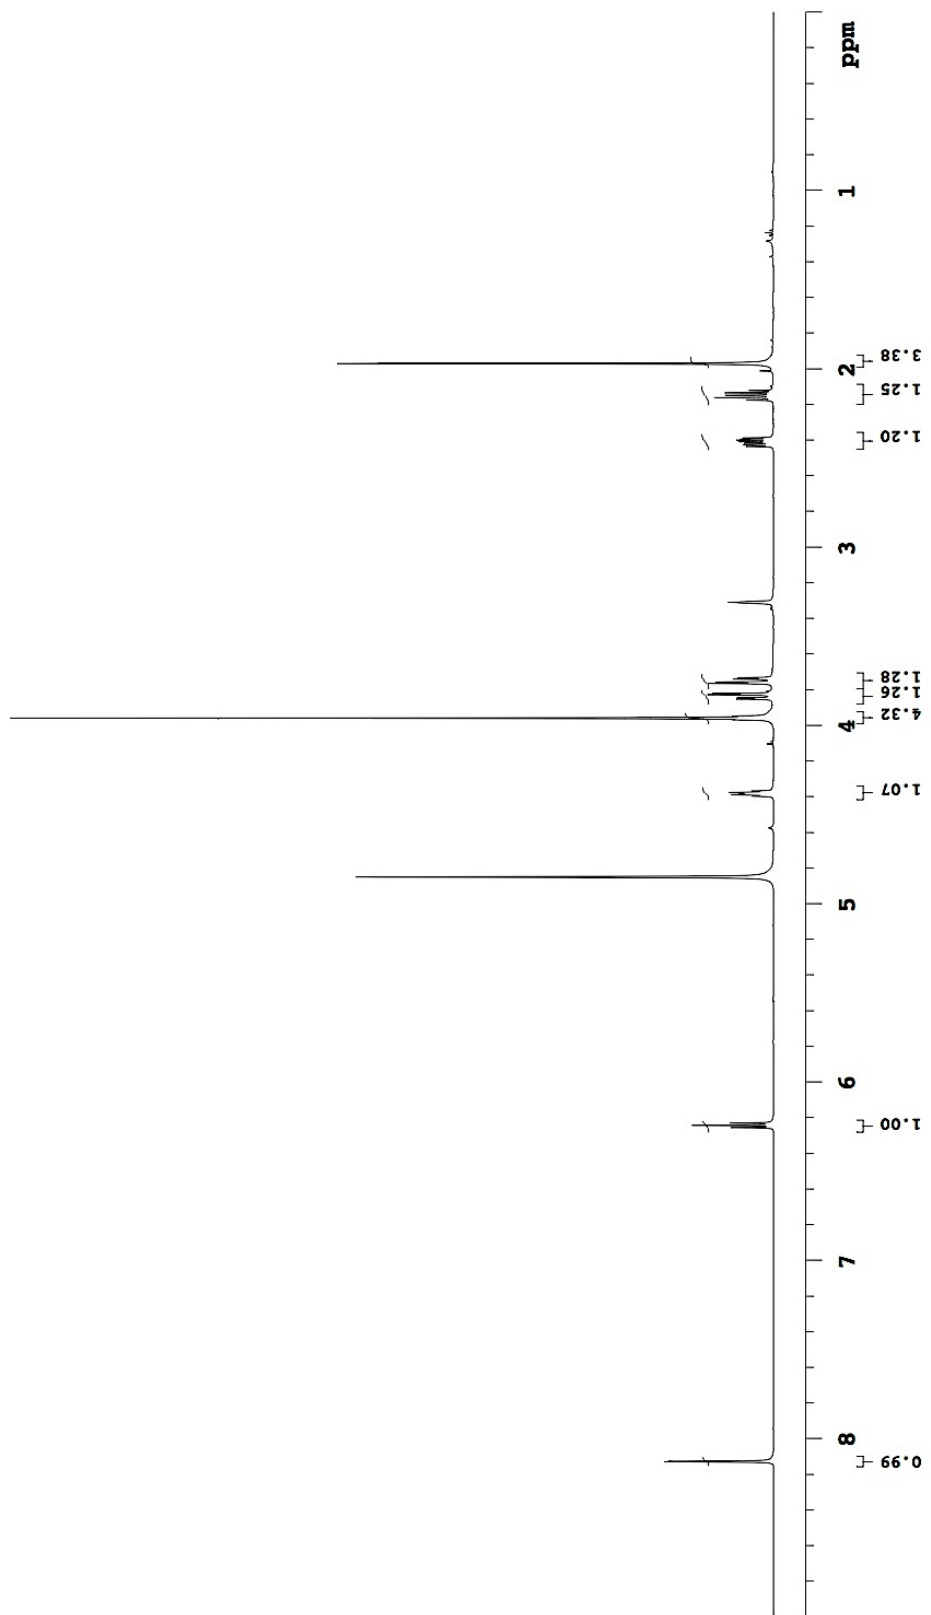

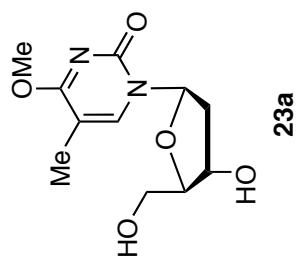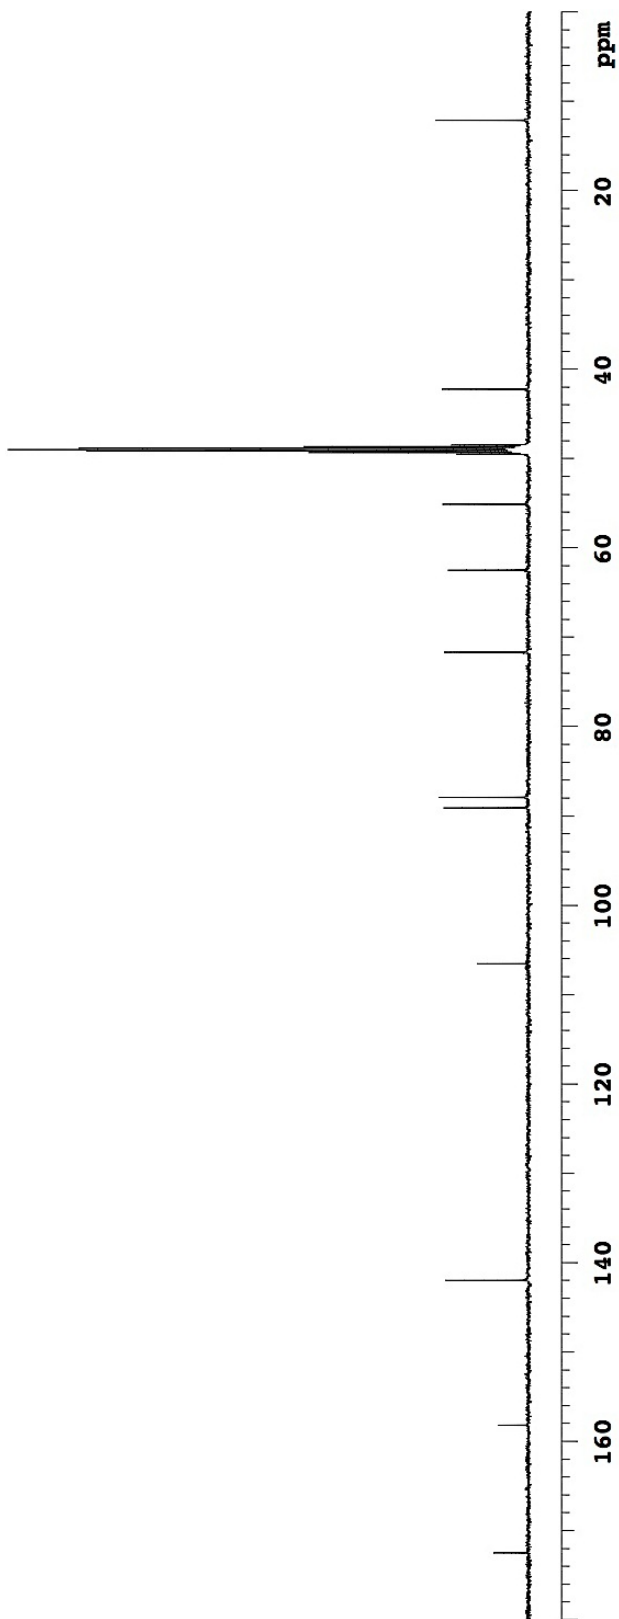

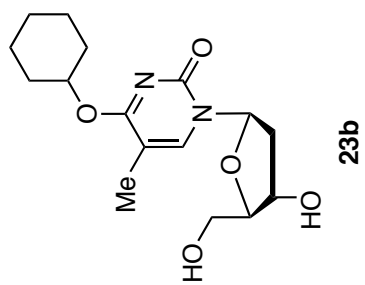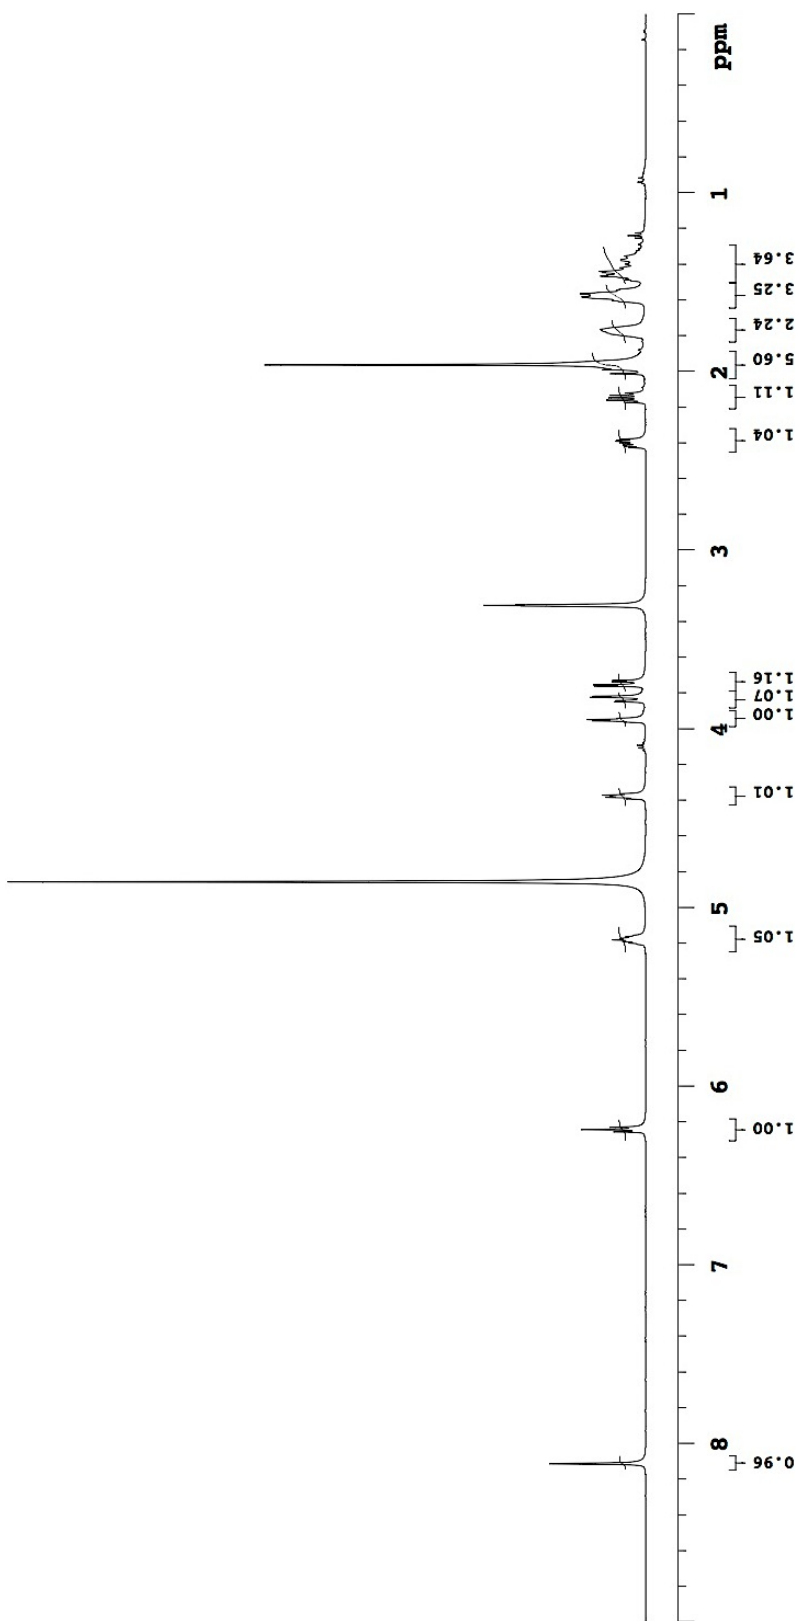

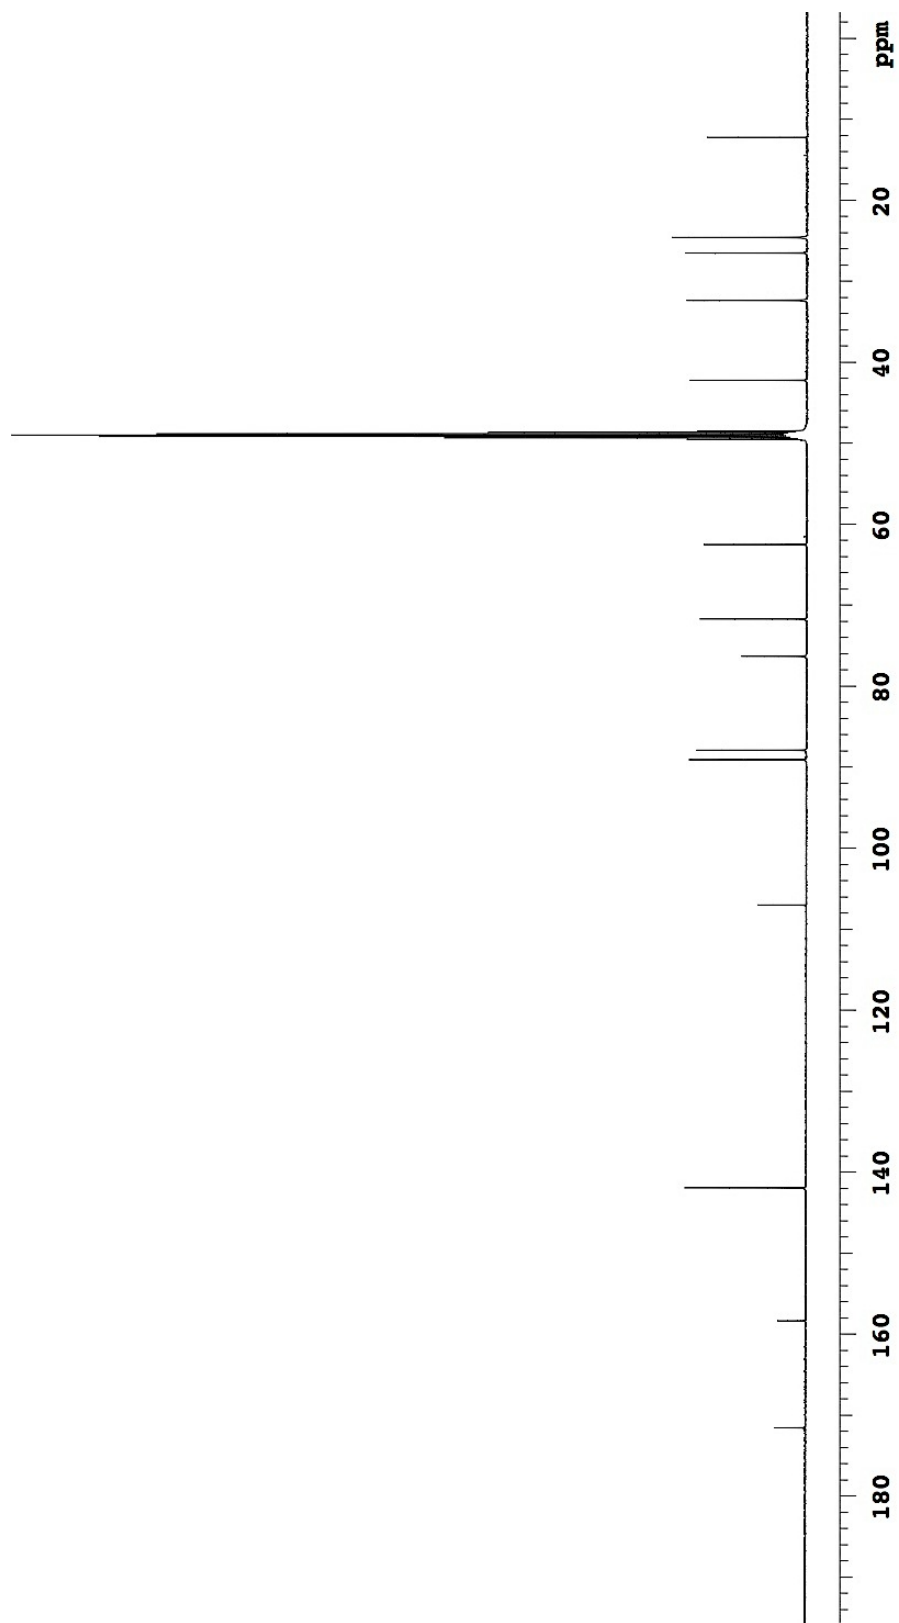

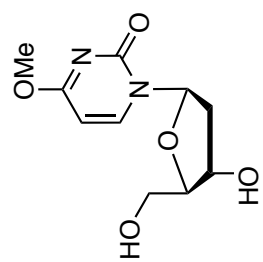

24

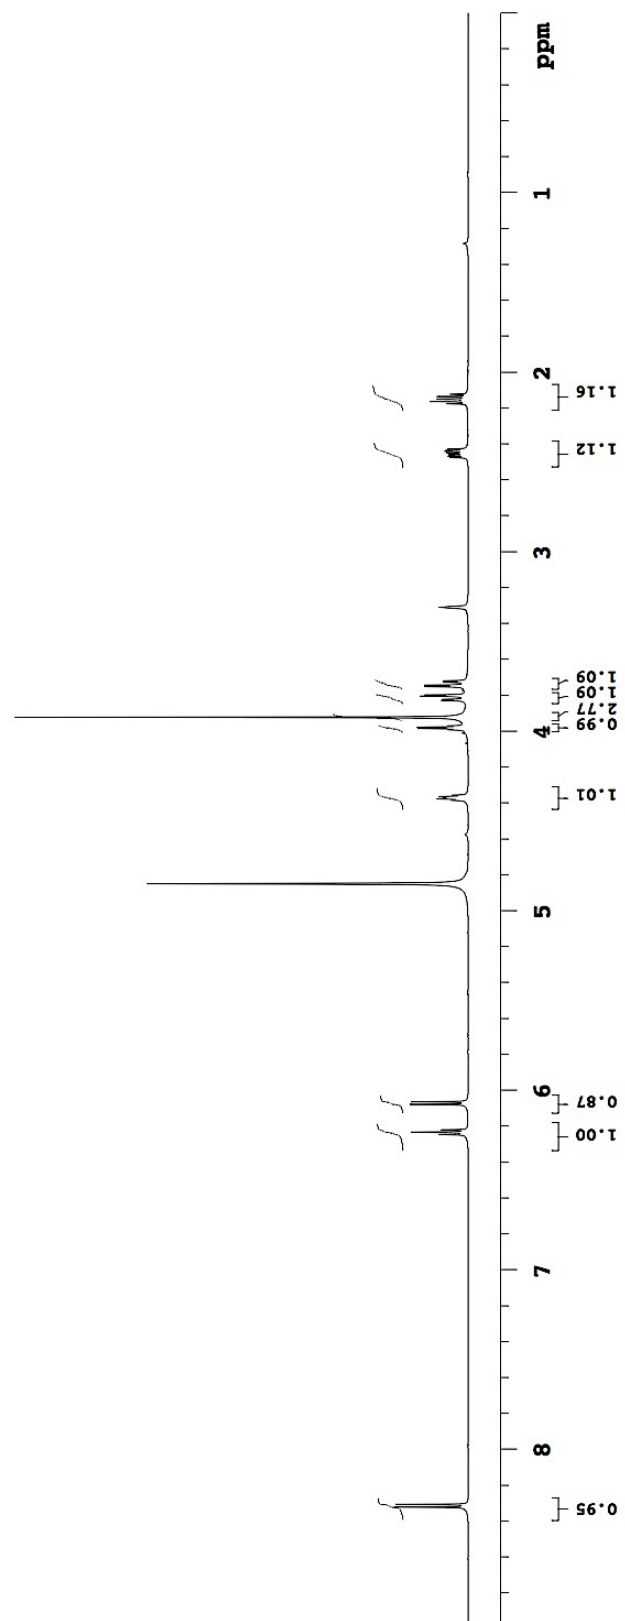



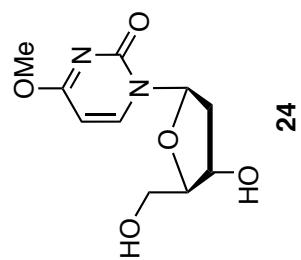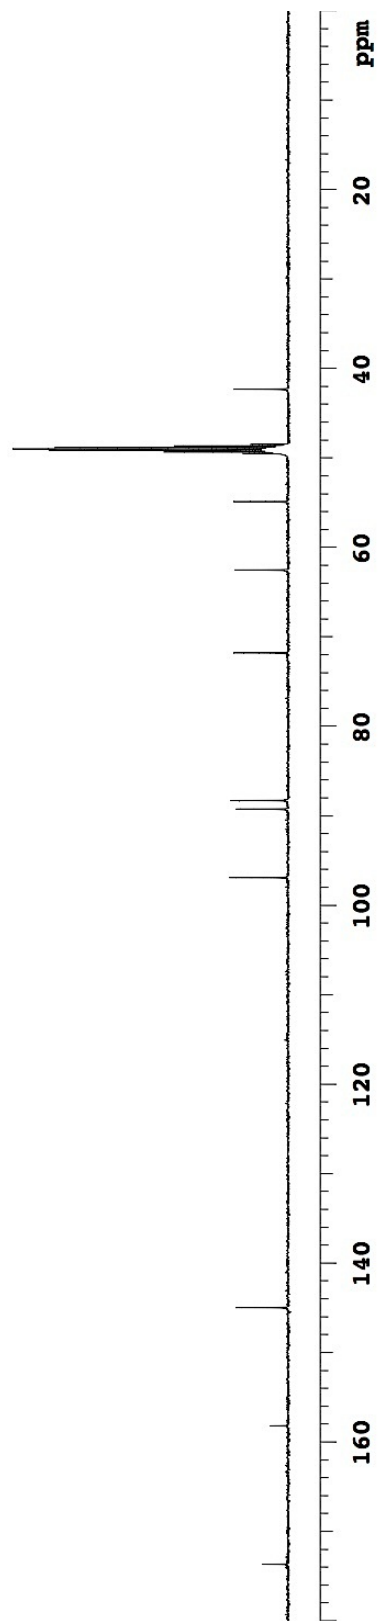

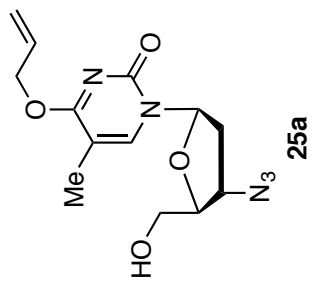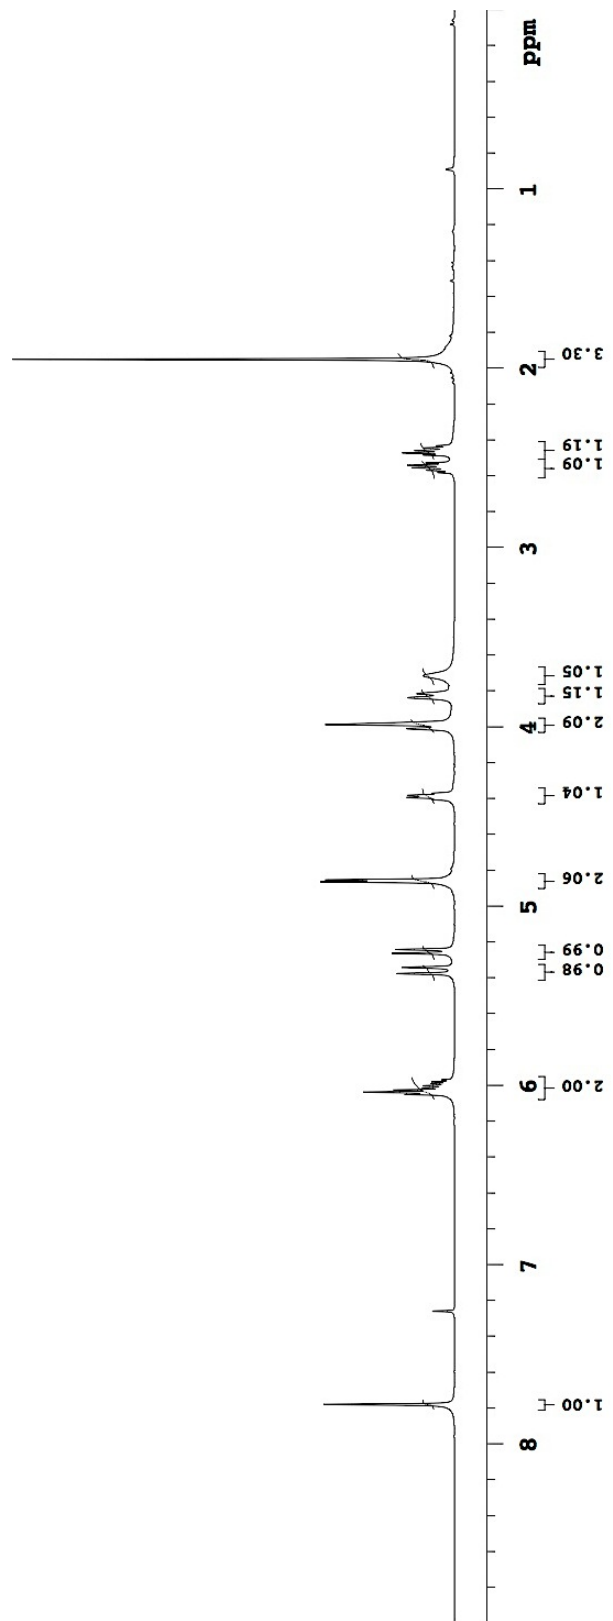

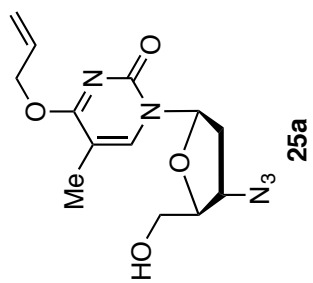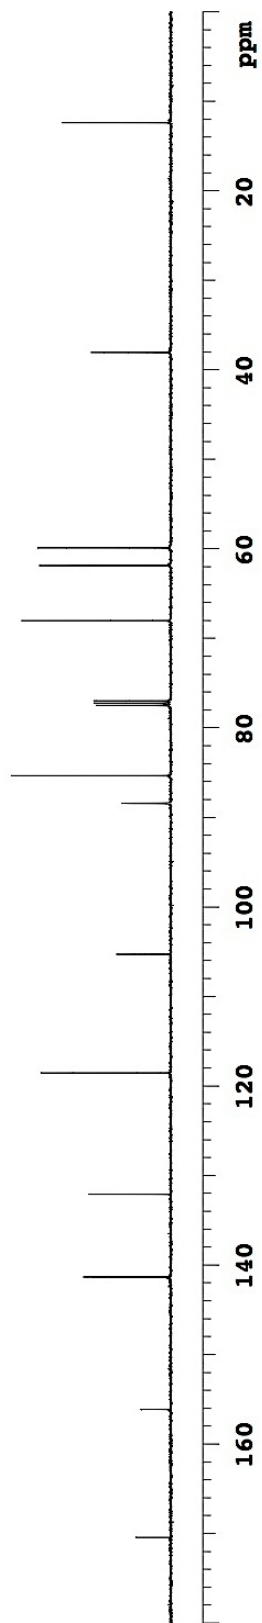

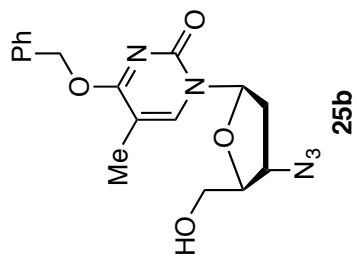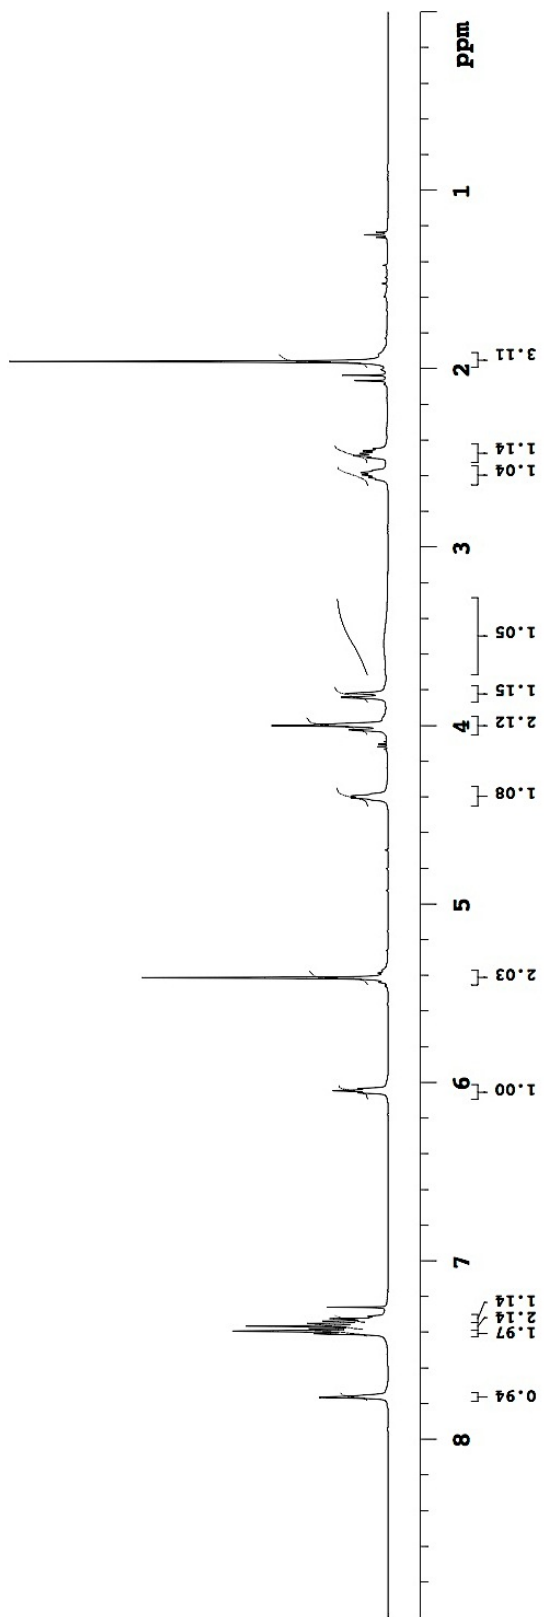

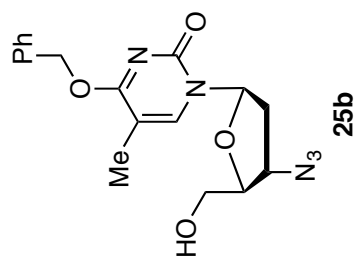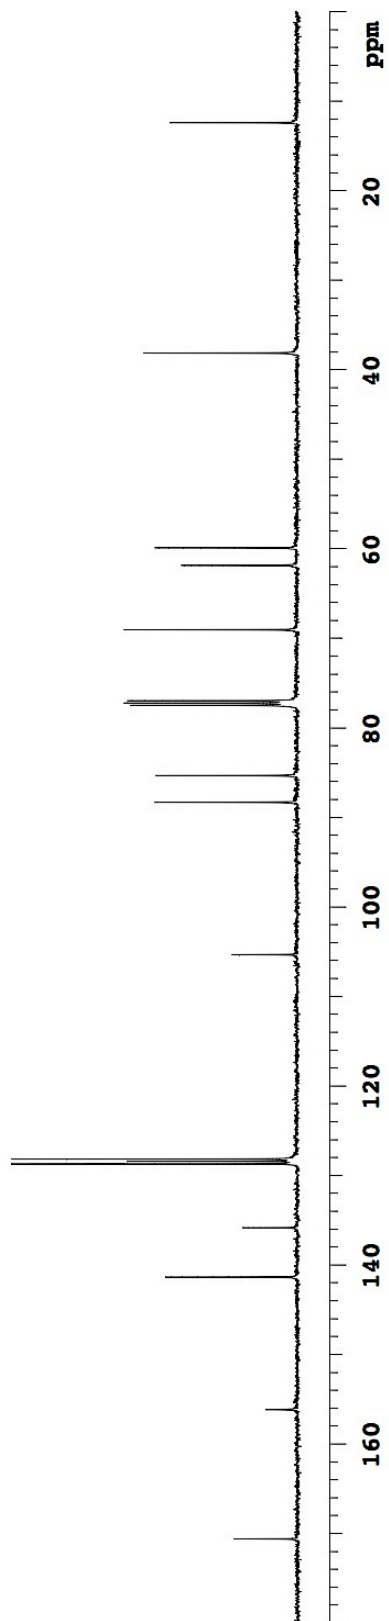

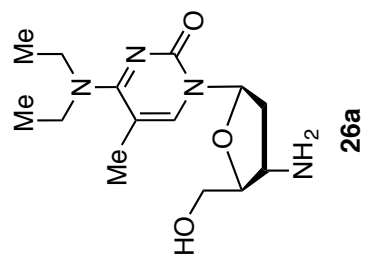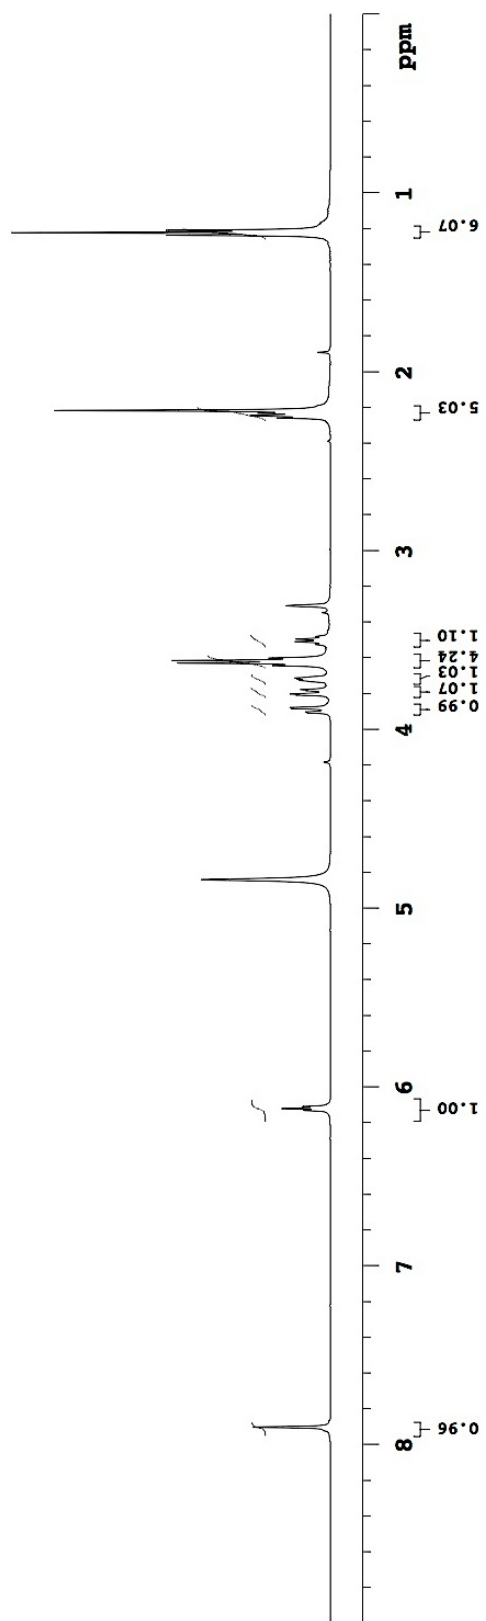

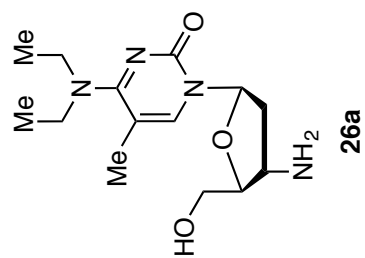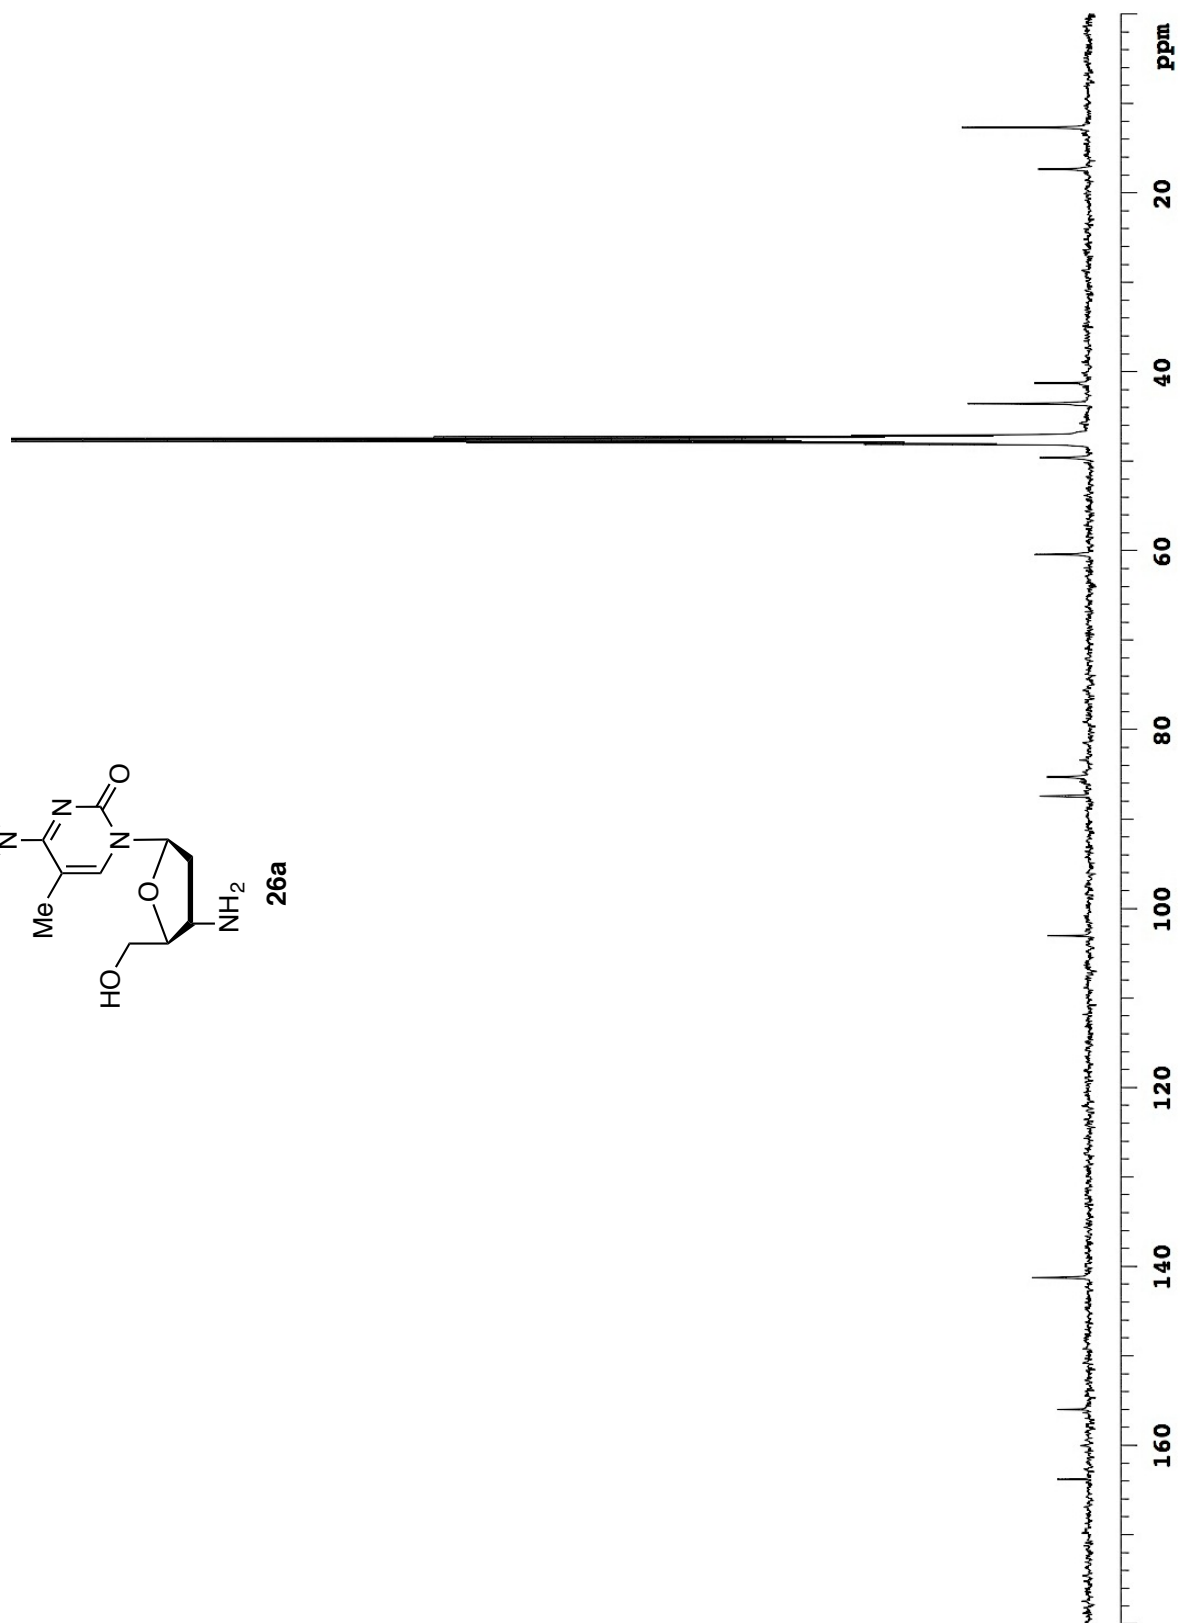

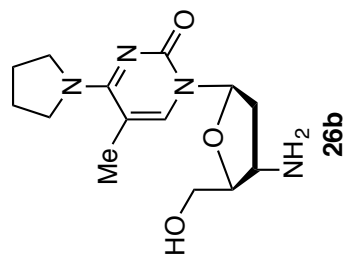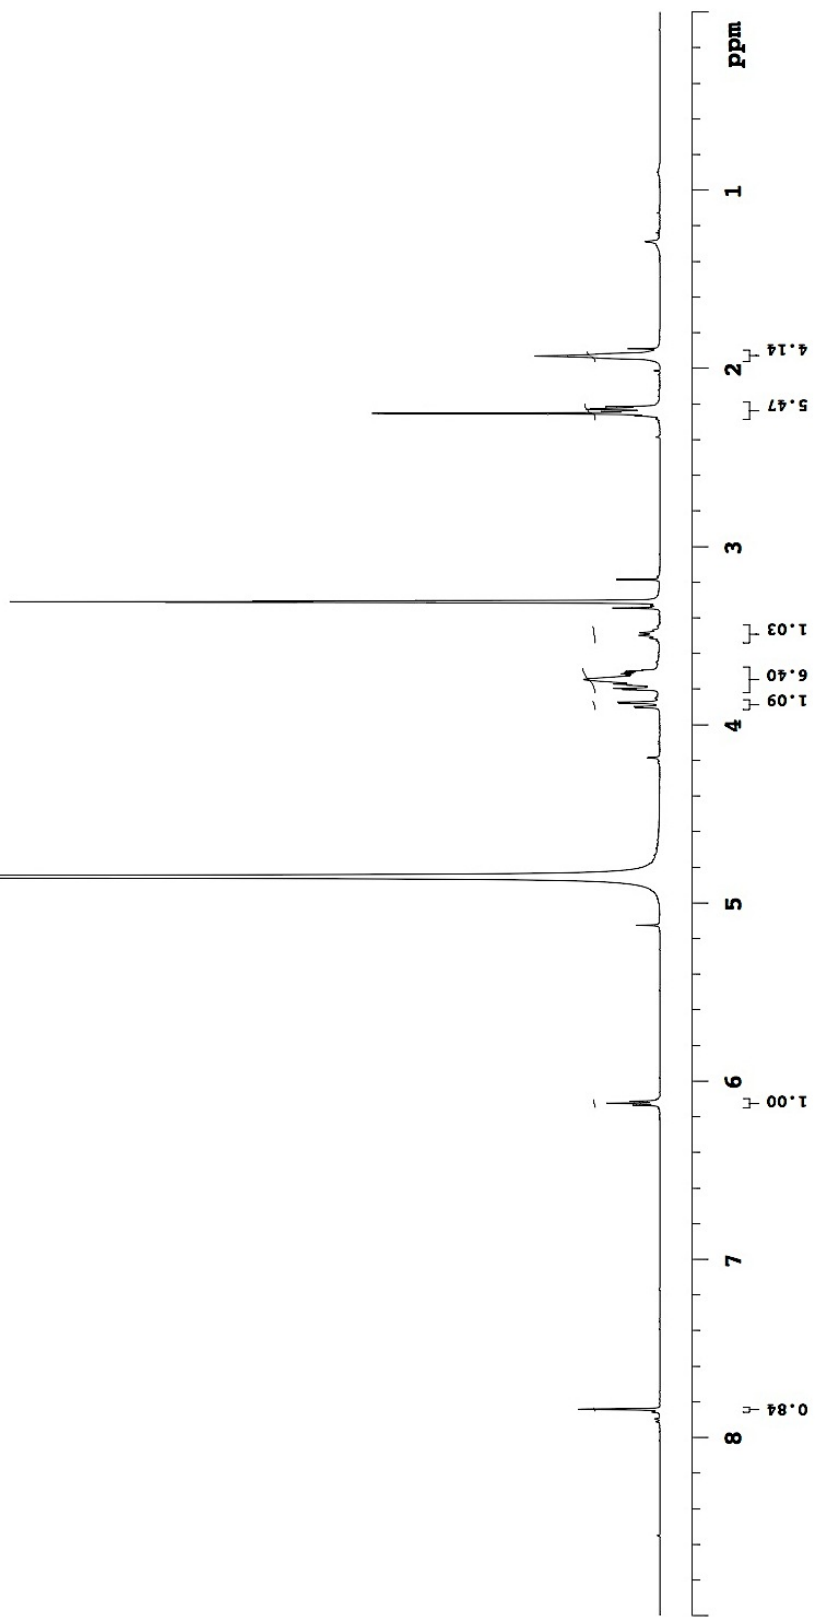



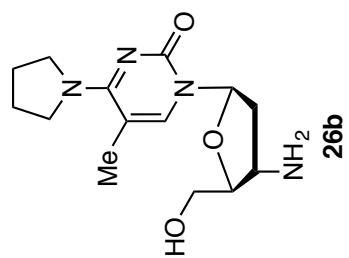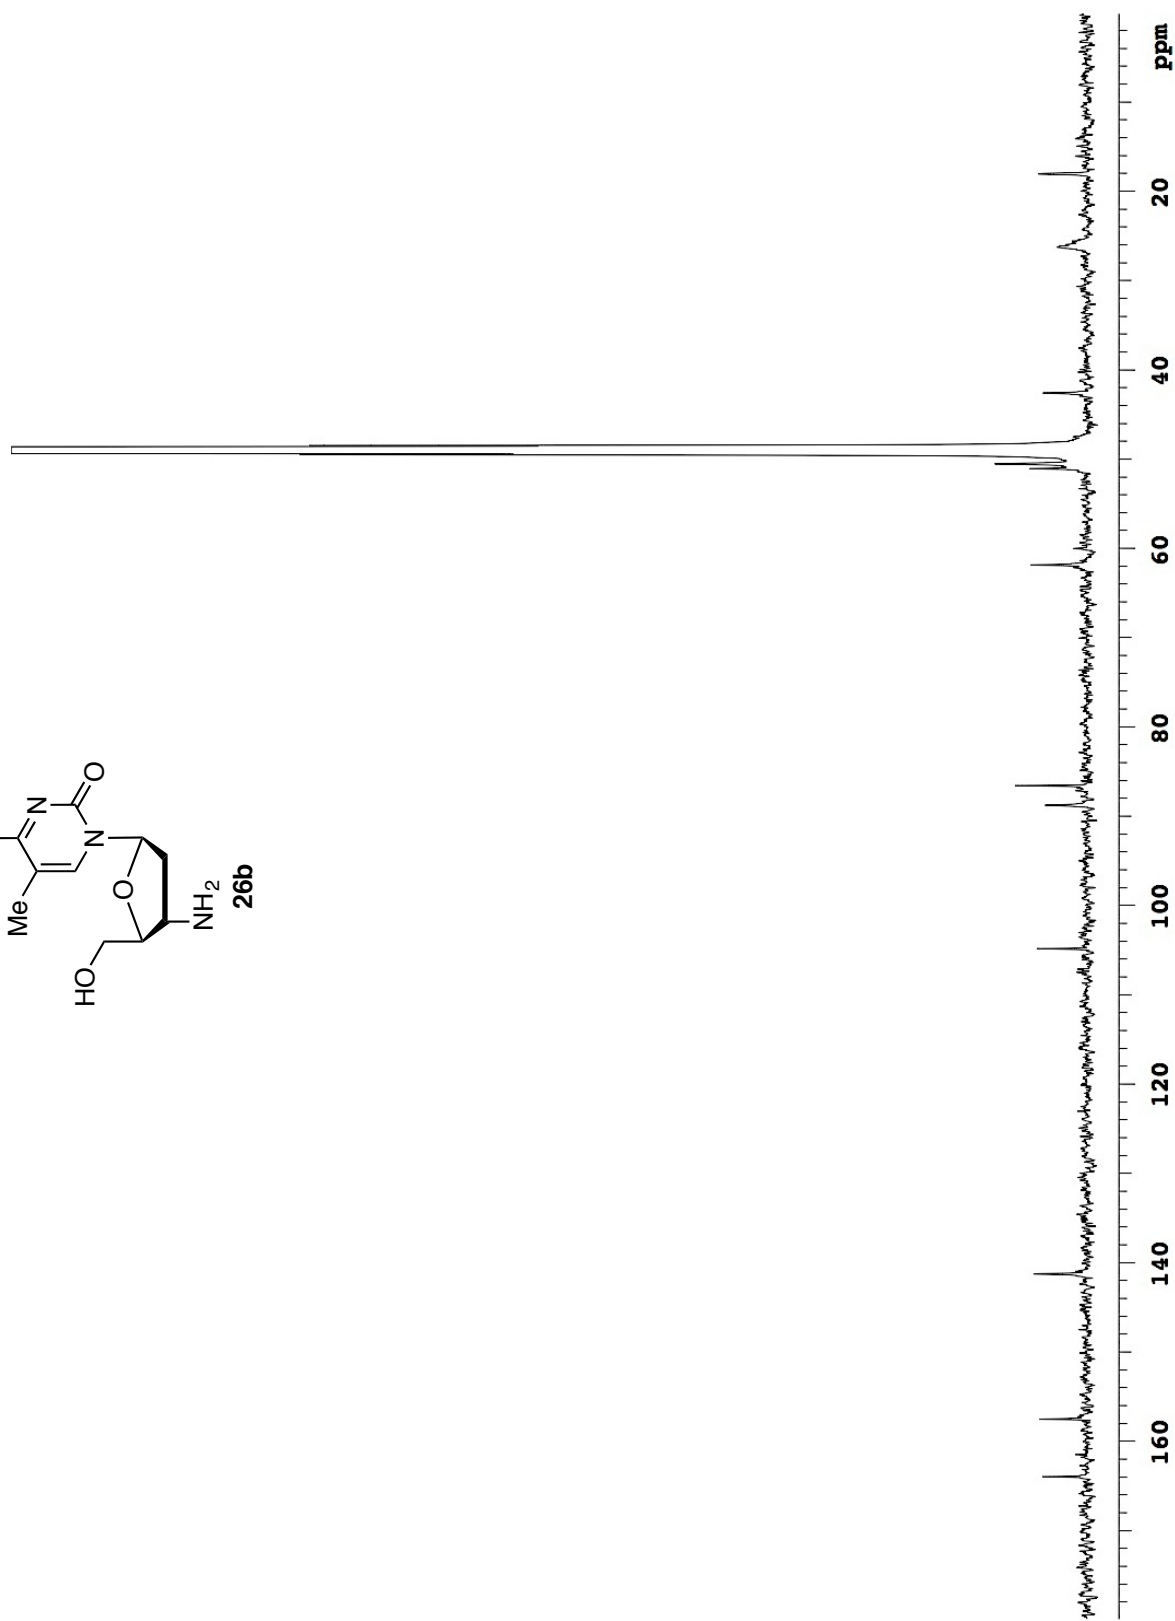

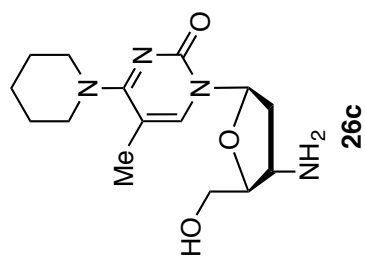

26c

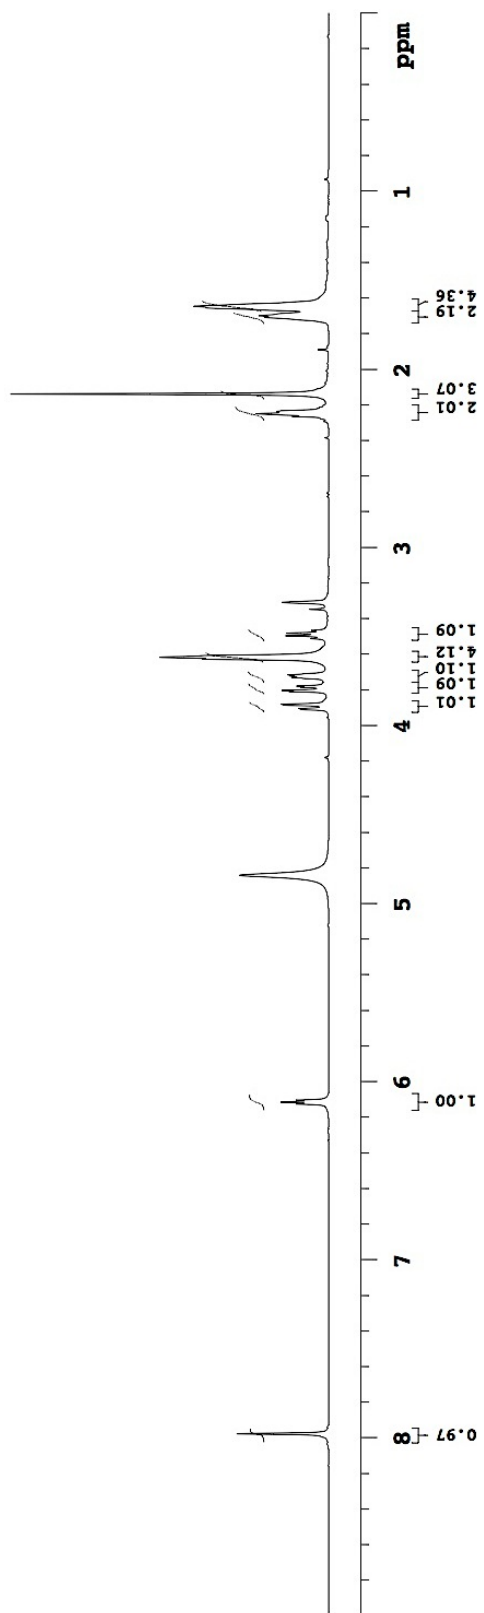

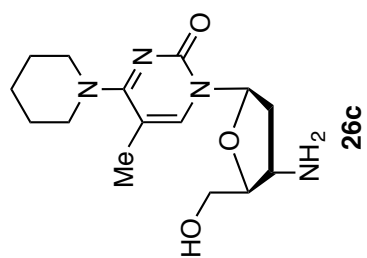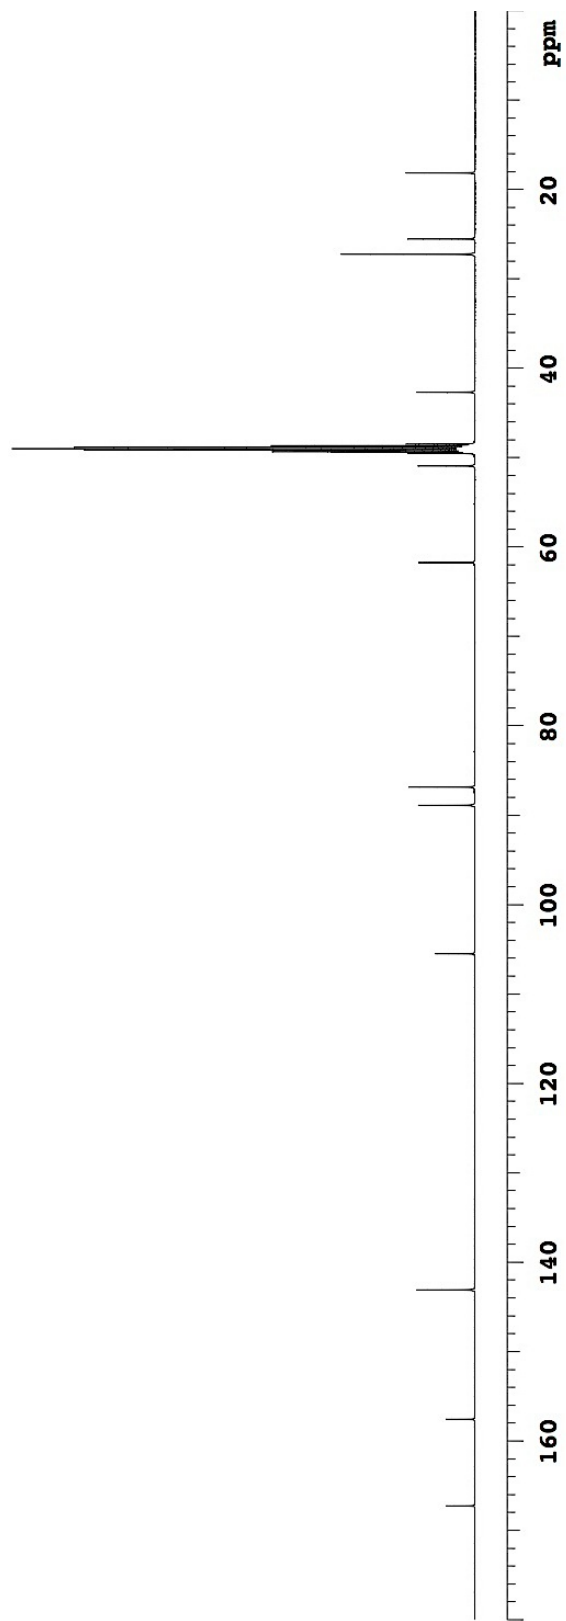

gCOSY spectrum of compound **26c** in CD<sub>3</sub>OD

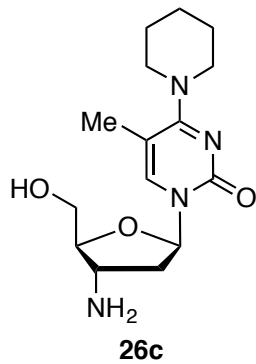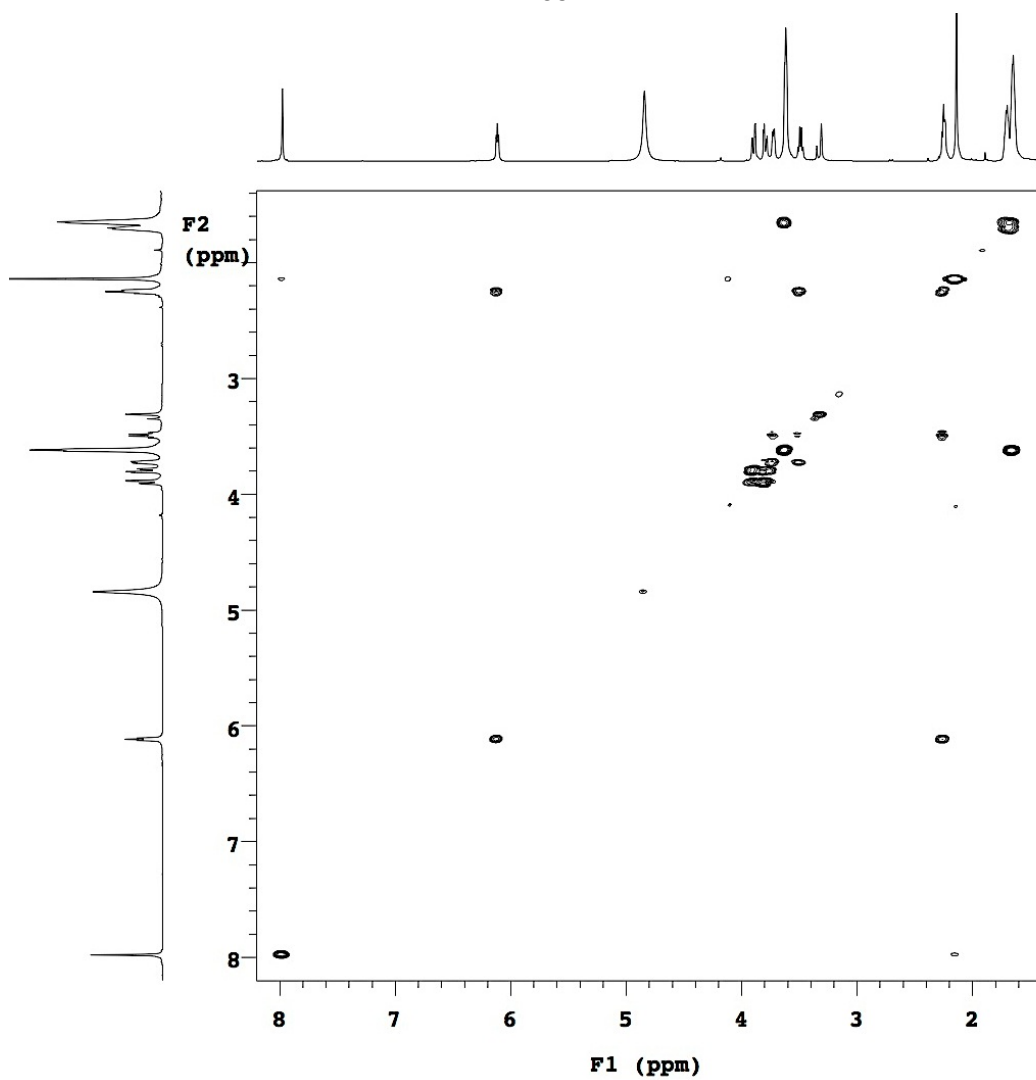

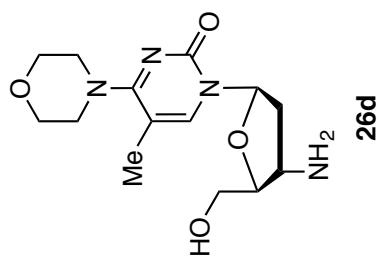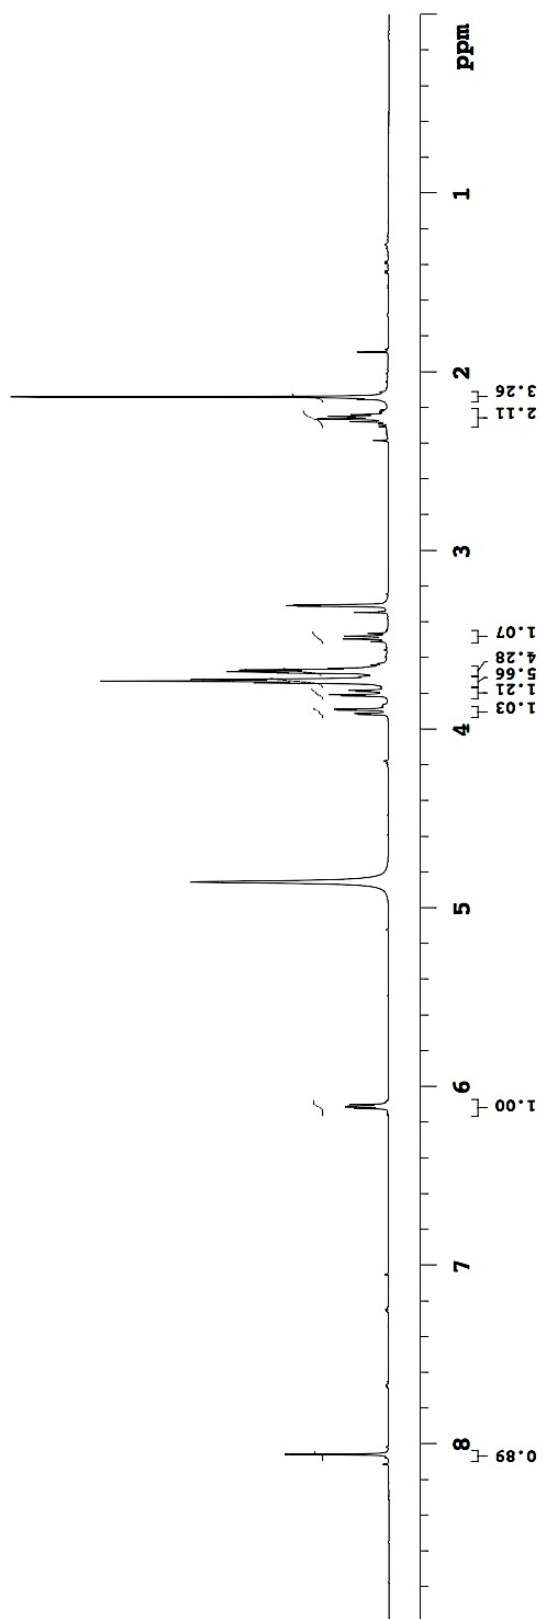



26d

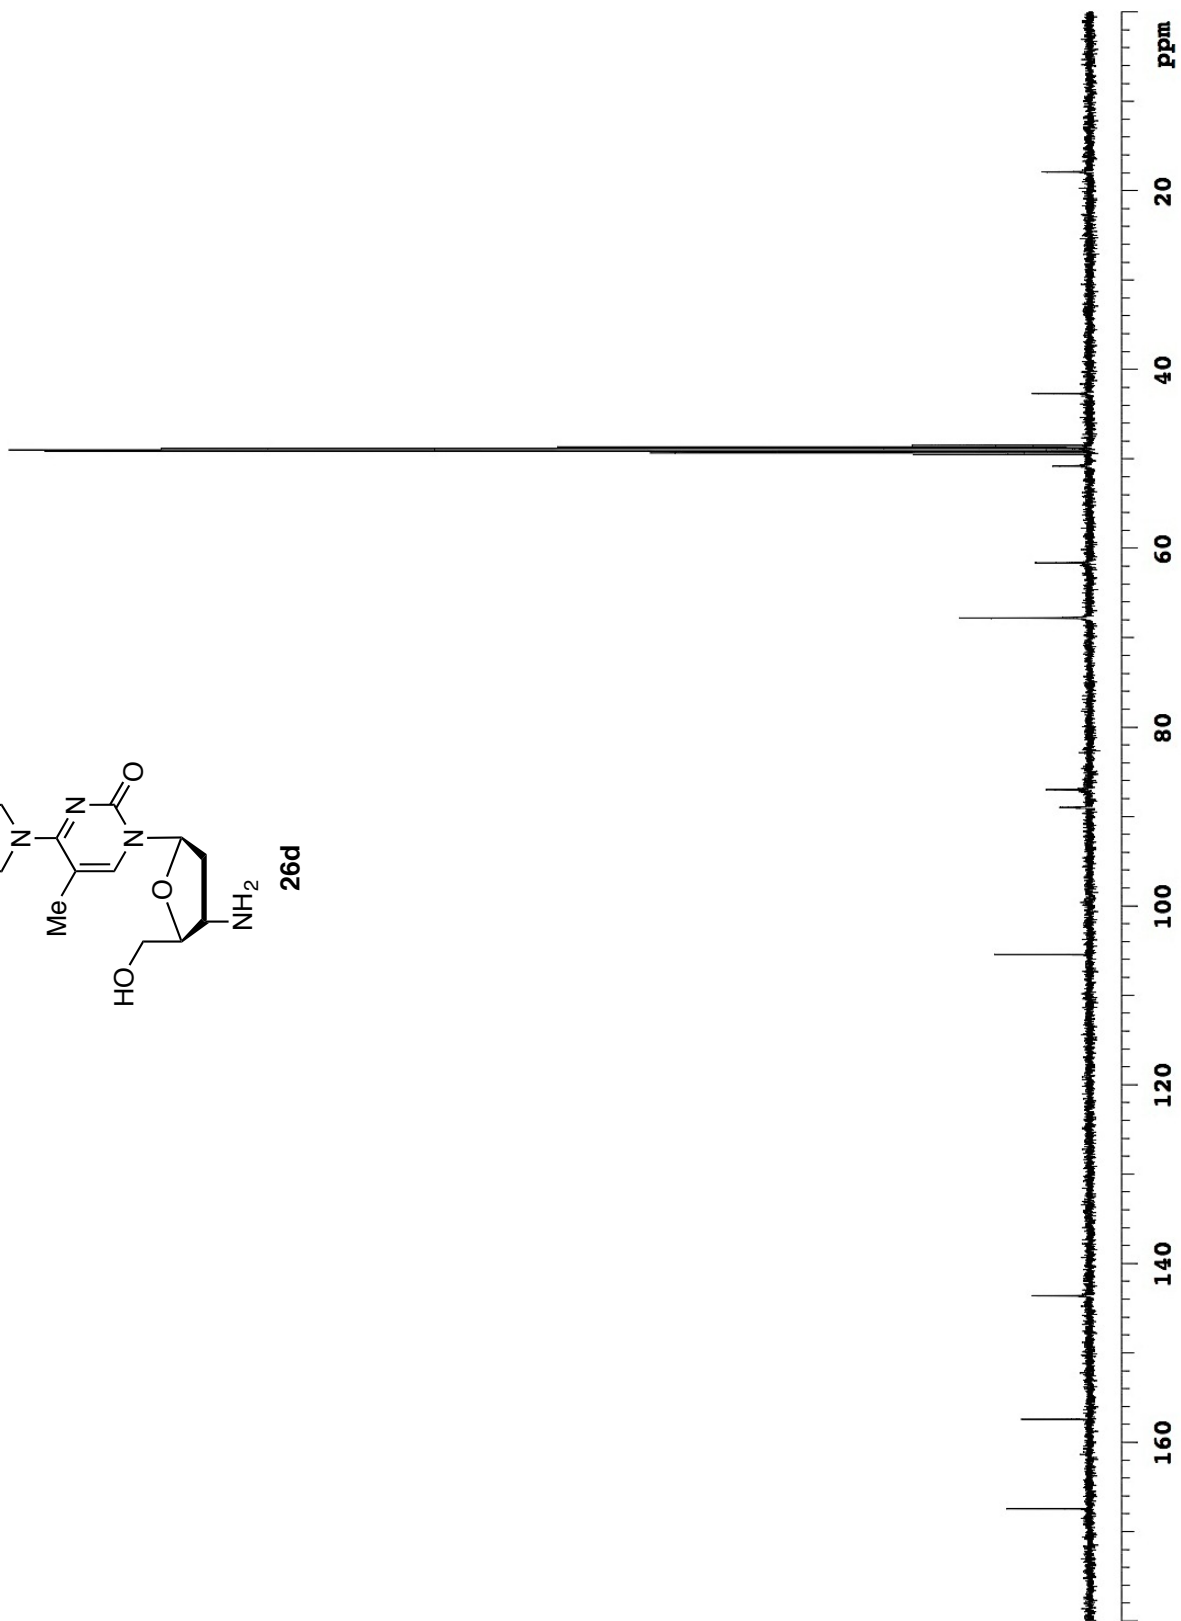

Supplement: NIHMS843560-supplement-ESI_2.pdf [file NIHMS843560-supplement-ESI_2.pdf]
